# Supplementary material for: Capabilities Approach Application in the Development of Regional Rehabilitation Systems in Russia
Source: MDPI journal article supplement (doi:10.3390/soc12060166), 2022-11-19
Supplement: s1 [file s1]

Archive with 3 entries (3 files):
- Indicators of the regional rehabilitation systems development in Russia (2018) (3).pdf
- Indicators of the regional rehabilitation systems development in Russia (2019) (3).pdf
- Indicators of the regional rehabilitation systems development in Russia (2020) (3).pdf
