# Supplementary material for: Capabilities Approach Application in the Development of Regional Rehabilitation Systems in Russia
Source: MDPI journal article supplement (doi:10.3390/soc12060166), 2022-11-19
Supplement: s1 [file s1 › Indicators of the regional rehabilitation systems development in Russia (2018) (3).pdf]

**Table S1: Indicators of the regional rehabilitation systems development in Russia (2018)**

| Regions of the Russian Federation | Number of organizations providing rehabilitation and (or) habilitation services and included in the regional system regarding to the formation an integrated approach to its arrangement | Total number of organizations providing rehabilitation and (or) habilitation services and located in the region | The share of organizations providing rehabilitation and (or) habilitation services and included in the regional system regarding to the formation an integrated approach to its arrangement in the total number of organizations providing rehabilitation and (or) habilitation services and located in the region, % | The share of organizations providing rehabilitation and (or) habilitation services and included in the regional system regarding to the formation an integrated approach to its arrangement in the total number of organizations providing rehabilitation and (or) habilitation services and located in the region, points | Number of regional agencies in various fields of activities (healthcare, education, social protection, physical culture and sports, culture, labor and employment, information and communication) involved in the formation of an integrated approach to the arrangement of the regional system | Number of regional agencies in various fields of activity (healthcare, education, social protection, physical culture and sports, culture, labor and employment, information and communication) involved in the formation of an integrated approach to the arrangement of the regional system, points | Availability of the legal and methodological base of the regional system for forming an integrated approach to its arrangement, agreements on interaction between providers of rehabilitation and (or) habilitation measures (presence – 1 point, absence – 0 point) | Funding allocated for rehabilitation and habilitation measures to meet the needs of the disabled in the assessment period, million rubles | Funding allocated for rehabilitation and habilitation measures to meet the needs of PwD in the previous period, million rubles | The share of changes in funding allocated for rehabilitation and habilitation measures to meet the needs of PwD in comparison with the previous period | The share of changes in funding allocated for rehabilitation and habilitation measures to meet the needs of PwD in comparison with the previous period, points | Availability of the feasible regional recommendations on options for the provision of rehabilitation and habilitation measures for PwD (plan approved by agencies, certificates, co-financing, and others) (presence - 1 point, absence - 0 point) | The formation of an integrated approach to the organization of the regional system in the region, points |
|-----------------------------------|------------------------------------------------------------------------------------------------------------------------------------------------------------------------------------------|-----------------------------------------------------------------------------------------------------------------|-----------------------------------------------------------------------------------------------------------------------------------------------------------------------------------------------------------------------------------------------------------------------------------------------------------------------|----------------------------------------------------------------------------------------------------------------------------------------------------------------------------------------------------------------------------------------------------------------------------------------------------------------------------|-------------------------------------------------------------------------------------------------------------------------------------------------------------------------------------------------------------------------------------------------------------------------------------------------|-------------------------------------------------------------------------------------------------------------------------------------------------------------------------------------------------------------------------------------------------------------------------------------------------------|----------------------------------------------------------------------------------------------------------------------------------------------------------------------------------------------------------------------------------------------------------------------|-------------------------------------------------------------------------------------------------------------------------------------------|--------------------------------------------------------------------------------------------------------------------------------|--------------------------------------------------------------------------------------------------------------------------------------------------------|----------------------------------------------------------------------------------------------------------------------------------------------------------------|----------------------------------------------------------------------------------------------------------------------------------------------------------------------------------------------------------------------------------------------------|----------------------------------------------------------------------------------------------------------|
| Region 1                          | 0                                                                                                                                                                                        | 264                                                                                                             | 0,0                                                                                                                                                                                                                                                                                                                   | 0,0                                                                                                                                                                                                                                                                                                                        | 1                                                                                                                                                                                                                                                                                               | 1                                                                                                                                                                                                                                                                                                     | 1                                                                                                                                                                                                                                                                    | 207,4                                                                                                                                     | 198                                                                                                                            | 1                                                                                                                                                      | 1                                                                                                                                                              | 0                                                                                                                                                                                                                                                  | 3,0                                                                                                      |
| Region 2                          | 0                                                                                                                                                                                        | 0                                                                                                               | 0,0                                                                                                                                                                                                                                                                                                                   | 0,0                                                                                                                                                                                                                                                                                                                        | 5                                                                                                                                                                                                                                                                                               | 0,7                                                                                                                                                                                                                                                                                                   | 1                                                                                                                                                                                                                                                                    | 0                                                                                                                                         | 0                                                                                                                              | 0,5                                                                                                                                                    | 0,5                                                                                                                                                            | 1                                                                                                                                                                                                                                                  | 3,2                                                                                                      |
| Region 3                          | 0                                                                                                                                                                                        | 17                                                                                                              | 0,0                                                                                                                                                                                                                                                                                                                   | 0,0                                                                                                                                                                                                                                                                                                                        | 1                                                                                                                                                                                                                                                                                               | 1                                                                                                                                                                                                                                                                                                     | 0                                                                                                                                                                                                                                                                    | 191,2                                                                                                                                     | 189,2                                                                                                                          | 0,5                                                                                                                                                    | 1                                                                                                                                                              | 0                                                                                                                                                                                                                                                  | 2,0                                                                                                      |
| Region 4                          | 40                                                                                                                                                                                       | 766                                                                                                             | 5,2                                                                                                                                                                                                                                                                                                                   | 0,0                                                                                                                                                                                                                                                                                                                        | 5                                                                                                                                                                                                                                                                                               | 0,7                                                                                                                                                                                                                                                                                                   | 0                                                                                                                                                                                                                                                                    |                                                                                                                                           |                                                                                                                                |                                                                                                                                                        | 0,5                                                                                                                                                            | 1                                                                                                                                                                                                                                                  | 2,2                                                                                                      |
| Region 5                          | 356                                                                                                                                                                                      | 559                                                                                                             | 63,7                                                                                                                                                                                                                                                                                                                  | 0,6                                                                                                                                                                                                                                                                                                                        | 1                                                                                                                                                                                                                                                                                               | 1                                                                                                                                                                                                                                                                                                     | 1                                                                                                                                                                                                                                                                    | 10                                                                                                                                        | 6,5                                                                                                                            | 1                                                                                                                                                      | 1                                                                                                                                                              | 1                                                                                                                                                                                                                                                  | 4,6                                                                                                      |
| Region 6                          | 53                                                                                                                                                                                       | 172                                                                                                             | 30,8                                                                                                                                                                                                                                                                                                                  | 0,3                                                                                                                                                                                                                                                                                                                        | 1                                                                                                                                                                                                                                                                                               | 1                                                                                                                                                                                                                                                                                                     | 1                                                                                                                                                                                                                                                                    | 685,4                                                                                                                                     | 612,1                                                                                                                          | 0,5                                                                                                                                                    | 1                                                                                                                                                              | 1                                                                                                                                                                                                                                                  | 4,3                                                                                                      |
| Region 7                          | 148                                                                                                                                                                                      | 493                                                                                                             | 30,0                                                                                                                                                                                                                                                                                                                  | 0,3                                                                                                                                                                                                                                                                                                                        | 1                                                                                                                                                                                                                                                                                               | 1                                                                                                                                                                                                                                                                                                     | 1                                                                                                                                                                                                                                                                    | 1464,3                                                                                                                                    | 1263,5                                                                                                                         | 0,2                                                                                                                                                    | 1                                                                                                                                                              | 0                                                                                                                                                                                                                                                  | 3,3                                                                                                      |
| Region 8                          | 49                                                                                                                                                                                       | 166                                                                                                             | 29,5                                                                                                                                                                                                                                                                                                                  | 0,2                                                                                                                                                                                                                                                                                                                        | 6                                                                                                                                                                                                                                                                                               | 1                                                                                                                                                                                                                                                                                                     | 1                                                                                                                                                                                                                                                                    | 241                                                                                                                                       | 240,8                                                                                                                          | 0,5                                                                                                                                                    | 1                                                                                                                                                              | 0                                                                                                                                                                                                                                                  | 3,2                                                                                                      |
| Region 9                          | 161                                                                                                                                                                                      | 161                                                                                                             | 100,0                                                                                                                                                                                                                                                                                                                 | 1,0                                                                                                                                                                                                                                                                                                                        | 2                                                                                                                                                                                                                                                                                               | 0,4                                                                                                                                                                                                                                                                                                   | 1                                                                                                                                                                                                                                                                    |                                                                                                                                           |                                                                                                                                |                                                                                                                                                        | 0,5                                                                                                                                                            | 1                                                                                                                                                                                                                                                  | 3,9                                                                                                      |
| Region 10                         | 532                                                                                                                                                                                      | 532                                                                                                             | 100,0                                                                                                                                                                                                                                                                                                                 | 1,0                                                                                                                                                                                                                                                                                                                        | 1                                                                                                                                                                                                                                                                                               | 1                                                                                                                                                                                                                                                                                                     | 1                                                                                                                                                                                                                                                                    |                                                                                                                                           |                                                                                                                                | 1                                                                                                                                                      | 0,5                                                                                                                                                            | 1                                                                                                                                                                                                                                                  | 4,5                                                                                                      |
| Region 11                         | 177                                                                                                                                                                                      | 177                                                                                                             | 100,0                                                                                                                                                                                                                                                                                                                 | 1,0                                                                                                                                                                                                                                                                                                                        | 1                                                                                                                                                                                                                                                                                               | 1                                                                                                                                                                                                                                                                                                     | 1                                                                                                                                                                                                                                                                    | 59                                                                                                                                        | 66,4                                                                                                                           | 0                                                                                                                                                      | 0                                                                                                                                                              | 1                                                                                                                                                                                                                                                  | 4,0                                                                                                      |
| Region 12                         | 0                                                                                                                                                                                        | 93                                                                                                              | 0,0                                                                                                                                                                                                                                                                                                                   | 0,0                                                                                                                                                                                                                                                                                                                        | 0                                                                                                                                                                                                                                                                                               | 0                                                                                                                                                                                                                                                                                                     | 0                                                                                                                                                                                                                                                                    | 12,087                                                                                                                                    | 11,776                                                                                                                         | 0,026                                                                                                                                                  | 1                                                                                                                                                              | 1                                                                                                                                                                                                                                                  | 2,0                                                                                                      |
| Region 13                         | 6                                                                                                                                                                                        | 9                                                                                                               | 66,7                                                                                                                                                                                                                                                                                                                  | 0,6                                                                                                                                                                                                                                                                                                                        | 3                                                                                                                                                                                                                                                                                               | 0,4                                                                                                                                                                                                                                                                                                   | 1                                                                                                                                                                                                                                                                    | 1                                                                                                                                         | 0,5                                                                                                                            | 1                                                                                                                                                      | 1                                                                                                                                                              | 1                                                                                                                                                                                                                                                  | 4,0                                                                                                      |
| Region 14                         | 138                                                                                                                                                                                      | 362                                                                                                             | 38,1                                                                                                                                                                                                                                                                                                                  | 0,3                                                                                                                                                                                                                                                                                                                        | 6                                                                                                                                                                                                                                                                                               | 1                                                                                                                                                                                                                                                                                                     | 1                                                                                                                                                                                                                                                                    | 18,73                                                                                                                                     | 5,2                                                                                                                            | 2,6                                                                                                                                                    | 1                                                                                                                                                              | 1                                                                                                                                                                                                                                                  | 4,3                                                                                                      |
| Region 15                         | 410                                                                                                                                                                                      | 125                                                                                                             | 328,0                                                                                                                                                                                                                                                                                                                 | 0,0                                                                                                                                                                                                                                                                                                                        | 5                                                                                                                                                                                                                                                                                               | 0,7                                                                                                                                                                                                                                                                                                   | 1                                                                                                                                                                                                                                                                    | 1425,1029                                                                                                                                 | 1530,793                                                                                                                       | 1                                                                                                                                                      | 0                                                                                                                                                              | 1                                                                                                                                                                                                                                                  | 2,7                                                                                                      |
| Region 16                         | 83                                                                                                                                                                                       | 139                                                                                                             | 59,7                                                                                                                                                                                                                                                                                                                  | 0,5                                                                                                                                                                                                                                                                                                                        | 5                                                                                                                                                                                                                                                                                               | 0,7                                                                                                                                                                                                                                                                                                   | 1                                                                                                                                                                                                                                                                    |                                                                                                                                           |                                                                                                                                | 1                                                                                                                                                      | 0,5                                                                                                                                                            | 1                                                                                                                                                                                                                                                  | 3,7                                                                                                      |
| Region 17                         | 42                                                                                                                                                                                       | 194                                                                                                             | 21,6                                                                                                                                                                                                                                                                                                                  | 0,2                                                                                                                                                                                                                                                                                                                        | 1                                                                                                                                                                                                                                                                                               | 1                                                                                                                                                                                                                                                                                                     | 1                                                                                                                                                                                                                                                                    | 2,7                                                                                                                                       | 2,7                                                                                                                            | 0,5                                                                                                                                                    | 0,5                                                                                                                                                            | 0                                                                                                                                                                                                                                                  | 2,7                                                                                                      |
| Region 18                         | 14                                                                                                                                                                                       | 1474                                                                                                            | 0,9                                                                                                                                                                                                                                                                                                                   | 0,0                                                                                                                                                                                                                                                                                                                        | 6                                                                                                                                                                                                                                                                                               | 1                                                                                                                                                                                                                                                                                                     | 1                                                                                                                                                                                                                                                                    | 283,57                                                                                                                                    | 163,07                                                                                                                         | 0,74                                                                                                                                                   | 1                                                                                                                                                              | 1                                                                                                                                                                                                                                                  | 4,0                                                                                                      |
| Region 19                         | 37                                                                                                                                                                                       | 125                                                                                                             | 29,6                                                                                                                                                                                                                                                                                                                  | 0,2                                                                                                                                                                                                                                                                                                                        | 1                                                                                                                                                                                                                                                                                               | 1                                                                                                                                                                                                                                                                                                     | 1                                                                                                                                                                                                                                                                    | 18,519892                                                                                                                                 | 16,516087                                                                                                                      | 1                                                                                                                                                      | 1                                                                                                                                                              | 0                                                                                                                                                                                                                                                  | 3,2                                                                                                      |
| Region 20                         | 39                                                                                                                                                                                       | 195                                                                                                             | 20,0                                                                                                                                                                                                                                                                                                                  | 0,2                                                                                                                                                                                                                                                                                                                        | 1                                                                                                                                                                                                                                                                                               | 1                                                                                                                                                                                                                                                                                                     | 1                                                                                                                                                                                                                                                                    | 16,7186                                                                                                                                   | 17,4161                                                                                                                        | 0                                                                                                                                                      | 0                                                                                                                                                              | 1                                                                                                                                                                                                                                                  | 3,2                                                                                                      |
| Region 21                         | 99                                                                                                                                                                                       | 101                                                                                                             | 98,0                                                                                                                                                                                                                                                                                                                  | 0,9                                                                                                                                                                                                                                                                                                                        | 1                                                                                                                                                                                                                                                                                               | 1                                                                                                                                                                                                                                                                                                     | 1                                                                                                                                                                                                                                                                    | 230,5                                                                                                                                     | 185,6                                                                                                                          | 0,2                                                                                                                                                    | 1                                                                                                                                                              | 1                                                                                                                                                                                                                                                  | 4,9                                                                                                      |
| Region 22                         | 1112                                                                                                                                                                                     | 1249                                                                                                            | 89,0                                                                                                                                                                                                                                                                                                                  | 0,8                                                                                                                                                                                                                                                                                                                        | 1                                                                                                                                                                                                                                                                                               | 1                                                                                                                                                                                                                                                                                                     | 1                                                                                                                                                                                                                                                                    |                                                                                                                                           |                                                                                                                                | 0,5                                                                                                                                                    | 0,5                                                                                                                                                            | 1                                                                                                                                                                                                                                                  | 4,3                                                                                                      |
| Region 23                         | 469                                                                                                                                                                                      | 482                                                                                                             | 97,3                                                                                                                                                                                                                                                                                                                  | 0,9                                                                                                                                                                                                                                                                                                                        | 4                                                                                                                                                                                                                                                                                               | 0,7                                                                                                                                                                                                                                                                                                   | 1                                                                                                                                                                                                                                                                    | 507,3                                                                                                                                     | 495,2                                                                                                                          | 0,02                                                                                                                                                   | 1                                                                                                                                                              | 1                                                                                                                                                                                                                                                  | 4,6                                                                                                      |
| Region 24                         | 0                                                                                                                                                                                        | 0,00001                                                                                                         | 0,0                                                                                                                                                                                                                                                                                                                   | 0,0                                                                                                                                                                                                                                                                                                                        | 0                                                                                                                                                                                                                                                                                               | 0                                                                                                                                                                                                                                                                                                     | 0                                                                                                                                                                                                                                                                    | 0                                                                                                                                         | 0                                                                                                                              | 0                                                                                                                                                      | 0,5                                                                                                                                                            | 0                                                                                                                                                                                                                                                  | 0,5                                                                                                      |

**Indicators of the regional rehabilitation systems development in Russia (2018)**

| Regions of the Russian Federation | Number of organizations providing rehabilitation and (or) habilitation services and included in the regional system regarding to the formation an integrated approach to its arrangement | Total number of organizations providing rehabilitation and (or) habilitation services and located in the region | The share of organizations providing rehabilitation and (or) habilitation services and included in the regional system regarding to the formation an integrated approach to its arrangement in the total number of organizations providing rehabilitation and (or) habilitation services and located in the region, % | The share of organizations providing rehabilitation and (or) habilitation services and included in the regional system regarding to the formation an integrated approach to its arrangement in the total number of organizations providing rehabilitation and (or) habilitation services and located in the region, points | Number of regional agencies in various fields of activities (healthcare, education, social protection, physical culture and sports, culture, labor and employment, information and communication) involved in the formation of an integrated approach to the arrangement of the regional system | Number of regional agencies in various fields of activity (healthcare, education, social protection, physical culture and sports, culture, labor and employment, information and communication) involved in the formation of an integrated approach to the arrangement of the regional system, points | Availability of the legal and methodological base of the regional system for forming an integrated approach to its arrangement, agreements on interaction between providers of rehabilitation and (or) habilitation measures (presence – 1 point, absence – 0 point) | Funding allocated for rehabilitation and habilitation measures to meet the needs of the disabled in the assessment period, million rubles | Funding allocated for rehabilitation and habilitation measures to meet the needs of PwD in the previous period, million rubles | The share of changes in funding allocated for rehabilitation and habilitation measures to meet the needs of PwD in comparison with the previous period | The share of changes in funding allocated for rehabilitation and habilitation measures to meet the needs of PwD in comparison with the previous period, points | Availability of the feasible regional recommendations on options for the provision of rehabilitation and habilitation measures for PwD (plan approved by agencies, certificates, co-financing, and others) (presence - 1 point, absence - 0 point) | The formation of an integrated approach to the organization of the regional system in the region, points |
|-----------------------------------|------------------------------------------------------------------------------------------------------------------------------------------------------------------------------------------|-----------------------------------------------------------------------------------------------------------------|-----------------------------------------------------------------------------------------------------------------------------------------------------------------------------------------------------------------------------------------------------------------------------------------------------------------------|----------------------------------------------------------------------------------------------------------------------------------------------------------------------------------------------------------------------------------------------------------------------------------------------------------------------------|-------------------------------------------------------------------------------------------------------------------------------------------------------------------------------------------------------------------------------------------------------------------------------------------------|-------------------------------------------------------------------------------------------------------------------------------------------------------------------------------------------------------------------------------------------------------------------------------------------------------|----------------------------------------------------------------------------------------------------------------------------------------------------------------------------------------------------------------------------------------------------------------------|-------------------------------------------------------------------------------------------------------------------------------------------|--------------------------------------------------------------------------------------------------------------------------------|--------------------------------------------------------------------------------------------------------------------------------------------------------|----------------------------------------------------------------------------------------------------------------------------------------------------------------|----------------------------------------------------------------------------------------------------------------------------------------------------------------------------------------------------------------------------------------------------|----------------------------------------------------------------------------------------------------------|
| Region 25                         | 1907                                                                                                                                                                                     | 2952                                                                                                            | 64,6                                                                                                                                                                                                                                                                                                                  | 0,6                                                                                                                                                                                                                                                                                                                        | 6                                                                                                                                                                                                                                                                                               | 1                                                                                                                                                                                                                                                                                                     | 1                                                                                                                                                                                                                                                                    | 1134,22                                                                                                                                   | 975,74                                                                                                                         | 0,16                                                                                                                                                   | 1                                                                                                                                                              | 1                                                                                                                                                                                                                                                  | 4,6                                                                                                      |
| Region 26                         | 347                                                                                                                                                                                      | 347                                                                                                             | 100,0                                                                                                                                                                                                                                                                                                                 | 1,0                                                                                                                                                                                                                                                                                                                        | 6                                                                                                                                                                                                                                                                                               | 1                                                                                                                                                                                                                                                                                                     | 0                                                                                                                                                                                                                                                                    | 39,9                                                                                                                                      | 46,6                                                                                                                           | -0,14                                                                                                                                                  | 0                                                                                                                                                              | 1                                                                                                                                                                                                                                                  | 3,0                                                                                                      |
| Region 27                         | 0                                                                                                                                                                                        | 0,00001                                                                                                         | 0,0                                                                                                                                                                                                                                                                                                                   | 0,0                                                                                                                                                                                                                                                                                                                        | 4                                                                                                                                                                                                                                                                                               | 0,7                                                                                                                                                                                                                                                                                                   | 1                                                                                                                                                                                                                                                                    |                                                                                                                                           |                                                                                                                                | 0,5                                                                                                                                                    | 0,5                                                                                                                                                            | 1                                                                                                                                                                                                                                                  | 3,2                                                                                                      |
| Region 28                         | 593                                                                                                                                                                                      | 1550                                                                                                            | 38,3                                                                                                                                                                                                                                                                                                                  | 0,3                                                                                                                                                                                                                                                                                                                        | 6                                                                                                                                                                                                                                                                                               | 1                                                                                                                                                                                                                                                                                                     | 1                                                                                                                                                                                                                                                                    | 266,07                                                                                                                                    | 215,16                                                                                                                         | 0,24                                                                                                                                                   | 1                                                                                                                                                              | 1                                                                                                                                                                                                                                                  | 4,3                                                                                                      |
| Region 29                         | 161                                                                                                                                                                                      | 238                                                                                                             | 67,6                                                                                                                                                                                                                                                                                                                  | 0,6                                                                                                                                                                                                                                                                                                                        | 4                                                                                                                                                                                                                                                                                               | 0,7                                                                                                                                                                                                                                                                                                   | 1                                                                                                                                                                                                                                                                    |                                                                                                                                           |                                                                                                                                | 1                                                                                                                                                      | 0,5                                                                                                                                                            | 1                                                                                                                                                                                                                                                  | 3,8                                                                                                      |
| Region 30                         | 153                                                                                                                                                                                      | 713                                                                                                             | 21,5                                                                                                                                                                                                                                                                                                                  | 0,2                                                                                                                                                                                                                                                                                                                        | 1                                                                                                                                                                                                                                                                                               | 1                                                                                                                                                                                                                                                                                                     | 1                                                                                                                                                                                                                                                                    | 237,18                                                                                                                                    | 229,76                                                                                                                         | 1                                                                                                                                                      | 1                                                                                                                                                              | 1                                                                                                                                                                                                                                                  | 4,2                                                                                                      |
| Region 31                         | 5                                                                                                                                                                                        | 5                                                                                                               | 100,0                                                                                                                                                                                                                                                                                                                 | 1,0                                                                                                                                                                                                                                                                                                                        | 5                                                                                                                                                                                                                                                                                               | 0,7                                                                                                                                                                                                                                                                                                   | 1                                                                                                                                                                                                                                                                    | 147,61351                                                                                                                                 | 101,96115                                                                                                                      | 0,447                                                                                                                                                  | 1                                                                                                                                                              | 0                                                                                                                                                                                                                                                  | 3,7                                                                                                      |
| Region 32                         | 0                                                                                                                                                                                        | 0,00001                                                                                                         | 0,0                                                                                                                                                                                                                                                                                                                   | 0,0                                                                                                                                                                                                                                                                                                                        | 0                                                                                                                                                                                                                                                                                               | 0                                                                                                                                                                                                                                                                                                     |                                                                                                                                                                                                                                                                      |                                                                                                                                           |                                                                                                                                |                                                                                                                                                        | 0,5                                                                                                                                                            |                                                                                                                                                                                                                                                    | 0,5                                                                                                      |
| Region 33                         | 128                                                                                                                                                                                      | 314                                                                                                             | 40,8                                                                                                                                                                                                                                                                                                                  | 0,4                                                                                                                                                                                                                                                                                                                        | 1                                                                                                                                                                                                                                                                                               | 1                                                                                                                                                                                                                                                                                                     | 1                                                                                                                                                                                                                                                                    | 44,9                                                                                                                                      | 44,60331                                                                                                                       | 1                                                                                                                                                      | 1                                                                                                                                                              | 1                                                                                                                                                                                                                                                  | 4,4                                                                                                      |
| Region 34                         | 200                                                                                                                                                                                      | 265                                                                                                             | 75,5                                                                                                                                                                                                                                                                                                                  | 0,7                                                                                                                                                                                                                                                                                                                        | 4                                                                                                                                                                                                                                                                                               | 0,7                                                                                                                                                                                                                                                                                                   | 1                                                                                                                                                                                                                                                                    | 300                                                                                                                                       | 300                                                                                                                            | 0,5                                                                                                                                                    | 0,5                                                                                                                                                            | 0                                                                                                                                                                                                                                                  | 2,9                                                                                                      |
| Region 35                         | 75                                                                                                                                                                                       | 244                                                                                                             | 30,7                                                                                                                                                                                                                                                                                                                  | 0,3                                                                                                                                                                                                                                                                                                                        | 1                                                                                                                                                                                                                                                                                               | 1                                                                                                                                                                                                                                                                                                     | 1                                                                                                                                                                                                                                                                    | 377,9                                                                                                                                     | 322,7                                                                                                                          | 1                                                                                                                                                      | 1                                                                                                                                                              | 1                                                                                                                                                                                                                                                  | 4,3                                                                                                      |
| Region 36                         | 0                                                                                                                                                                                        | 332                                                                                                             | 0,0                                                                                                                                                                                                                                                                                                                   | 0,0                                                                                                                                                                                                                                                                                                                        | 1                                                                                                                                                                                                                                                                                               | 1                                                                                                                                                                                                                                                                                                     | 1                                                                                                                                                                                                                                                                    | 970,1                                                                                                                                     | 733                                                                                                                            | 1                                                                                                                                                      | 1                                                                                                                                                              | 1                                                                                                                                                                                                                                                  | 4,0                                                                                                      |
| Region 37                         | 520                                                                                                                                                                                      | 872                                                                                                             | 59,6                                                                                                                                                                                                                                                                                                                  | 0,5                                                                                                                                                                                                                                                                                                                        | 5                                                                                                                                                                                                                                                                                               | 0,7                                                                                                                                                                                                                                                                                                   | 0                                                                                                                                                                                                                                                                    | 440                                                                                                                                       | 401,1                                                                                                                          | 1                                                                                                                                                      | 1                                                                                                                                                              | 1                                                                                                                                                                                                                                                  | 3,2                                                                                                      |
| Region 38                         | 22                                                                                                                                                                                       | 41                                                                                                              | 53,7                                                                                                                                                                                                                                                                                                                  | 0,5                                                                                                                                                                                                                                                                                                                        | 5                                                                                                                                                                                                                                                                                               | 0,7                                                                                                                                                                                                                                                                                                   | 0                                                                                                                                                                                                                                                                    | 36,32                                                                                                                                     | 0                                                                                                                              | 1                                                                                                                                                      | 0,5                                                                                                                                                            | 0                                                                                                                                                                                                                                                  | 1,7                                                                                                      |
| Region 39                         | 374                                                                                                                                                                                      | 377                                                                                                             | 99,2                                                                                                                                                                                                                                                                                                                  | 0,9                                                                                                                                                                                                                                                                                                                        | 5                                                                                                                                                                                                                                                                                               | 0,7                                                                                                                                                                                                                                                                                                   | 1                                                                                                                                                                                                                                                                    | 0,8                                                                                                                                       | 0,8                                                                                                                            | 0                                                                                                                                                      | 0,5                                                                                                                                                            | 0                                                                                                                                                                                                                                                  | 3,1                                                                                                      |
| Region 40                         | 35                                                                                                                                                                                       | 64                                                                                                              | 54,7                                                                                                                                                                                                                                                                                                                  | 0,5                                                                                                                                                                                                                                                                                                                        | 1                                                                                                                                                                                                                                                                                               | 1                                                                                                                                                                                                                                                                                                     | 1                                                                                                                                                                                                                                                                    | 220,879845                                                                                                                                | 128,910157                                                                                                                     | 1                                                                                                                                                      | 1                                                                                                                                                              | 1                                                                                                                                                                                                                                                  | 4,5                                                                                                      |
| Region 41                         | 97                                                                                                                                                                                       | 322                                                                                                             | 30,1                                                                                                                                                                                                                                                                                                                  | 0,3                                                                                                                                                                                                                                                                                                                        | 4                                                                                                                                                                                                                                                                                               | 0,7                                                                                                                                                                                                                                                                                                   | 1                                                                                                                                                                                                                                                                    | 46,1609                                                                                                                                   | 0                                                                                                                              | 1                                                                                                                                                      | 0,5                                                                                                                                                            | 1                                                                                                                                                                                                                                                  | 3,5                                                                                                      |
| Region 42                         | 0                                                                                                                                                                                        | 0,00001                                                                                                         | 0,0                                                                                                                                                                                                                                                                                                                   | 0,0                                                                                                                                                                                                                                                                                                                        | 0                                                                                                                                                                                                                                                                                               | 0                                                                                                                                                                                                                                                                                                     |                                                                                                                                                                                                                                                                      |                                                                                                                                           |                                                                                                                                |                                                                                                                                                        | 0,5                                                                                                                                                            |                                                                                                                                                                                                                                                    | 0,5                                                                                                      |
| Region 43                         | 0                                                                                                                                                                                        | 178                                                                                                             | 0,0                                                                                                                                                                                                                                                                                                                   | 0,0                                                                                                                                                                                                                                                                                                                        | 0                                                                                                                                                                                                                                                                                               | 0                                                                                                                                                                                                                                                                                                     | 0                                                                                                                                                                                                                                                                    | 0                                                                                                                                         | 0                                                                                                                              | 0                                                                                                                                                      | 0,5                                                                                                                                                            | 1                                                                                                                                                                                                                                                  | 1,5                                                                                                      |
| Region 44                         | 27                                                                                                                                                                                       | 107                                                                                                             | 25,2                                                                                                                                                                                                                                                                                                                  | 0,2                                                                                                                                                                                                                                                                                                                        | 1                                                                                                                                                                                                                                                                                               | 1                                                                                                                                                                                                                                                                                                     | 1                                                                                                                                                                                                                                                                    | 895,05504                                                                                                                                 | 745,60835                                                                                                                      | 0,2                                                                                                                                                    | 1                                                                                                                                                              | 0                                                                                                                                                                                                                                                  | 3,2                                                                                                      |
| Region 45                         | 2                                                                                                                                                                                        | 2                                                                                                               | 100,0                                                                                                                                                                                                                                                                                                                 | 1,0                                                                                                                                                                                                                                                                                                                        | 1                                                                                                                                                                                                                                                                                               | 1                                                                                                                                                                                                                                                                                                     | 1                                                                                                                                                                                                                                                                    | 141,3                                                                                                                                     | 370,9                                                                                                                          | 0                                                                                                                                                      | 0                                                                                                                                                              | 1                                                                                                                                                                                                                                                  | 4,0                                                                                                      |
| Region 46                         | 0                                                                                                                                                                                        | 0                                                                                                               | 0,0                                                                                                                                                                                                                                                                                                                   | 0,0                                                                                                                                                                                                                                                                                                                        | 1                                                                                                                                                                                                                                                                                               | 1                                                                                                                                                                                                                                                                                                     | 1                                                                                                                                                                                                                                                                    |                                                                                                                                           |                                                                                                                                | 0,5                                                                                                                                                    | 0,5                                                                                                                                                            | 1                                                                                                                                                                                                                                                  | 3,5                                                                                                      |
| Region 47                         | 24                                                                                                                                                                                       | 64                                                                                                              | 37,5                                                                                                                                                                                                                                                                                                                  | 0,3                                                                                                                                                                                                                                                                                                                        | 1                                                                                                                                                                                                                                                                                               | 1                                                                                                                                                                                                                                                                                                     | 1                                                                                                                                                                                                                                                                    | 4,4                                                                                                                                       | 7,3                                                                                                                            | 0                                                                                                                                                      | 0                                                                                                                                                              | 0                                                                                                                                                                                                                                                  | 2,3                                                                                                      |
| Region 48                         | 1158                                                                                                                                                                                     | 1264                                                                                                            | 91,6                                                                                                                                                                                                                                                                                                                  | 0,9                                                                                                                                                                                                                                                                                                                        | 1                                                                                                                                                                                                                                                                                               | 1                                                                                                                                                                                                                                                                                                     | 1                                                                                                                                                                                                                                                                    | 7,03                                                                                                                                      | 6,03                                                                                                                           | 1                                                                                                                                                      | 1                                                                                                                                                              | 1                                                                                                                                                                                                                                                  | 4,9                                                                                                      |

**Indicators of the regional rehabilitation systems development in Russia (2018)**

| Regions of the Russian Federation | Number of organizations providing rehabilitation and (or) habilitation services and included in the regional system regarding to the formation an integrated approach to its arrangement | Total number of organizations providing rehabilitation and (or) habilitation services and located in the region | The share of organizations providing rehabilitation and (or) habilitation services and included in the regional system regarding to the formation an integrated approach to its arrangement in the total number of organizations providing rehabilitation and (or) habilitation services and located in the region, % | The share of organizations providing rehabilitation and (or) habilitation services and included in the regional system regarding to the formation an integrated approach to its arrangement in the total number of organizations providing rehabilitation and (or) habilitation services and located in the region, points | Number of regional agencies in various fields of activities (healthcare, education, social protection, physical culture and sports, culture, labor and employment, information and communication) involved in the formation of an integrated approach to the arrangement of the regional system | Number of regional agencies in various fields of activity (healthcare, education, social protection, physical culture and sports, culture, labor and employment, information and communication) involved in the formation of an integrated approach to the arrangement of the regional system, points | Availability of the legal and methodological base of the regional system for forming an integrated approach to its arrangement, agreements on interaction between providers of rehabilitation and (or) habilitation measures (presence – 1 point, absence – 0 point) | Funding allocated for rehabilitation and habilitation measures to meet the needs of the disabled in the assessment period, million rubles | Funding allocated for rehabilitation and habilitation measures to meet the needs of PwD in the previous period, million rubles | The share of changes in funding allocated for rehabilitation and habilitation measures to meet the needs of PwD in comparison with the previous period | The share of changes in funding allocated for rehabilitation and habilitation measures to meet the needs of PwD in comparison with the previous period, points | Availability of the feasible regional recommendations on options for the provision of rehabilitation and habilitation measures for PwD (plan approved by agencies, certificates, co-financing, and others) (presence - 1 point, absence - 0 point) | The formation of an integrated approach to the organization of the regional system in the region, points |
|-----------------------------------|------------------------------------------------------------------------------------------------------------------------------------------------------------------------------------------|-----------------------------------------------------------------------------------------------------------------|-----------------------------------------------------------------------------------------------------------------------------------------------------------------------------------------------------------------------------------------------------------------------------------------------------------------------|----------------------------------------------------------------------------------------------------------------------------------------------------------------------------------------------------------------------------------------------------------------------------------------------------------------------------|-------------------------------------------------------------------------------------------------------------------------------------------------------------------------------------------------------------------------------------------------------------------------------------------------|-------------------------------------------------------------------------------------------------------------------------------------------------------------------------------------------------------------------------------------------------------------------------------------------------------|----------------------------------------------------------------------------------------------------------------------------------------------------------------------------------------------------------------------------------------------------------------------|-------------------------------------------------------------------------------------------------------------------------------------------|--------------------------------------------------------------------------------------------------------------------------------|--------------------------------------------------------------------------------------------------------------------------------------------------------|----------------------------------------------------------------------------------------------------------------------------------------------------------------|----------------------------------------------------------------------------------------------------------------------------------------------------------------------------------------------------------------------------------------------------|----------------------------------------------------------------------------------------------------------|
| Region 49                         | 44                                                                                                                                                                                       | 91                                                                                                              | 48,4                                                                                                                                                                                                                                                                                                                  | 0,4                                                                                                                                                                                                                                                                                                                        | 6                                                                                                                                                                                                                                                                                               | 1                                                                                                                                                                                                                                                                                                     | 0                                                                                                                                                                                                                                                                    | 3048,7                                                                                                                                    | 2453,2                                                                                                                         | 1                                                                                                                                                      | 1                                                                                                                                                              | 0                                                                                                                                                                                                                                                  | 2,4                                                                                                      |
| Region 50                         |                                                                                                                                                                                          |                                                                                                                 | 0,0                                                                                                                                                                                                                                                                                                                   | 0,0                                                                                                                                                                                                                                                                                                                        | 1                                                                                                                                                                                                                                                                                               | 1                                                                                                                                                                                                                                                                                                     | 1                                                                                                                                                                                                                                                                    |                                                                                                                                           |                                                                                                                                | 0,5                                                                                                                                                    | 0,5                                                                                                                                                            | 1                                                                                                                                                                                                                                                  | 3,5                                                                                                      |
| Region 51                         | 323                                                                                                                                                                                      | 497                                                                                                             | 65,0                                                                                                                                                                                                                                                                                                                  | 0,6                                                                                                                                                                                                                                                                                                                        | 1                                                                                                                                                                                                                                                                                               | 1                                                                                                                                                                                                                                                                                                     | 1                                                                                                                                                                                                                                                                    | 1217,4                                                                                                                                    | 547                                                                                                                            | 1                                                                                                                                                      | 1                                                                                                                                                              | 1                                                                                                                                                                                                                                                  | 4,6                                                                                                      |
| Region 52                         | 18                                                                                                                                                                                       | 57                                                                                                              | 31,6                                                                                                                                                                                                                                                                                                                  | 0,3                                                                                                                                                                                                                                                                                                                        | 6                                                                                                                                                                                                                                                                                               | 1                                                                                                                                                                                                                                                                                                     | 1                                                                                                                                                                                                                                                                    | 44,3                                                                                                                                      | 16,1                                                                                                                           | 1,7                                                                                                                                                    | 1                                                                                                                                                              | 1                                                                                                                                                                                                                                                  | 4,3                                                                                                      |
| Region 53                         | 13                                                                                                                                                                                       | 63                                                                                                              | 20,6                                                                                                                                                                                                                                                                                                                  | 0,2                                                                                                                                                                                                                                                                                                                        | 5                                                                                                                                                                                                                                                                                               | 0,7                                                                                                                                                                                                                                                                                                   | 0                                                                                                                                                                                                                                                                    | 674,2                                                                                                                                     | 556,4                                                                                                                          | 0,2                                                                                                                                                    | 1                                                                                                                                                              | 1                                                                                                                                                                                                                                                  | 2,9                                                                                                      |
| Region 54                         | 0                                                                                                                                                                                        | 0                                                                                                               | 0,0                                                                                                                                                                                                                                                                                                                   | 0,0                                                                                                                                                                                                                                                                                                                        | 7                                                                                                                                                                                                                                                                                               | 1                                                                                                                                                                                                                                                                                                     | 1                                                                                                                                                                                                                                                                    |                                                                                                                                           |                                                                                                                                |                                                                                                                                                        | 0,5                                                                                                                                                            | 1                                                                                                                                                                                                                                                  | 3,5                                                                                                      |
| Region 55                         | 1075                                                                                                                                                                                     | 1098                                                                                                            | 97,9                                                                                                                                                                                                                                                                                                                  | 0,9                                                                                                                                                                                                                                                                                                                        | 6                                                                                                                                                                                                                                                                                               | 1                                                                                                                                                                                                                                                                                                     | 1                                                                                                                                                                                                                                                                    |                                                                                                                                           |                                                                                                                                |                                                                                                                                                        | 0,5                                                                                                                                                            | 1                                                                                                                                                                                                                                                  | 4,4                                                                                                      |
| Region 56                         | 0                                                                                                                                                                                        | 0                                                                                                               | 0,0                                                                                                                                                                                                                                                                                                                   | 0,0                                                                                                                                                                                                                                                                                                                        | 1                                                                                                                                                                                                                                                                                               | 1                                                                                                                                                                                                                                                                                                     | 1                                                                                                                                                                                                                                                                    |                                                                                                                                           |                                                                                                                                | 1                                                                                                                                                      | 0,5                                                                                                                                                            | 1                                                                                                                                                                                                                                                  | 3,5                                                                                                      |
| Region 57                         | 50                                                                                                                                                                                       | 116                                                                                                             | 43,1                                                                                                                                                                                                                                                                                                                  | 0,4                                                                                                                                                                                                                                                                                                                        | 1                                                                                                                                                                                                                                                                                               | 1                                                                                                                                                                                                                                                                                                     | 1                                                                                                                                                                                                                                                                    | 2024,20286                                                                                                                                | 1868,40814                                                                                                                     | 1                                                                                                                                                      | 1                                                                                                                                                              | 1                                                                                                                                                                                                                                                  | 4,4                                                                                                      |
| Region 58                         | 2303                                                                                                                                                                                     | 2433                                                                                                            | 94,7                                                                                                                                                                                                                                                                                                                  | 0,9                                                                                                                                                                                                                                                                                                                        | 1                                                                                                                                                                                                                                                                                               | 1                                                                                                                                                                                                                                                                                                     | 1                                                                                                                                                                                                                                                                    | 2460,81                                                                                                                                   | 2369,3                                                                                                                         | 0,04                                                                                                                                                   | 1                                                                                                                                                              | 1                                                                                                                                                                                                                                                  | 4,9                                                                                                      |
| Region 59                         | 26                                                                                                                                                                                       | 319                                                                                                             | 8,2                                                                                                                                                                                                                                                                                                                   | 0,0                                                                                                                                                                                                                                                                                                                        | 6                                                                                                                                                                                                                                                                                               | 1                                                                                                                                                                                                                                                                                                     | 1                                                                                                                                                                                                                                                                    | 277,4                                                                                                                                     | 121,7                                                                                                                          | 1,28                                                                                                                                                   | 1                                                                                                                                                              | 1                                                                                                                                                                                                                                                  | 4,0                                                                                                      |
| Region 60                         | 0                                                                                                                                                                                        | 399                                                                                                             | 0,0                                                                                                                                                                                                                                                                                                                   | 0,0                                                                                                                                                                                                                                                                                                                        | 5                                                                                                                                                                                                                                                                                               | 0,7                                                                                                                                                                                                                                                                                                   | 1                                                                                                                                                                                                                                                                    | 301,6                                                                                                                                     | 267                                                                                                                            | 1                                                                                                                                                      | 1                                                                                                                                                              | 1                                                                                                                                                                                                                                                  | 3,7                                                                                                      |
| Region 61                         | 0                                                                                                                                                                                        | 45                                                                                                              | 0,0                                                                                                                                                                                                                                                                                                                   | 0,0                                                                                                                                                                                                                                                                                                                        | 1                                                                                                                                                                                                                                                                                               | 1                                                                                                                                                                                                                                                                                                     | 1                                                                                                                                                                                                                                                                    | 94,3872                                                                                                                                   | 123,5119                                                                                                                       | 0                                                                                                                                                      | 0                                                                                                                                                              | 1                                                                                                                                                                                                                                                  | 3,0                                                                                                      |
| Region 62                         |                                                                                                                                                                                          |                                                                                                                 | 0,0                                                                                                                                                                                                                                                                                                                   | 0,0                                                                                                                                                                                                                                                                                                                        | 0                                                                                                                                                                                                                                                                                               | 0                                                                                                                                                                                                                                                                                                     |                                                                                                                                                                                                                                                                      |                                                                                                                                           |                                                                                                                                |                                                                                                                                                        | 0,5                                                                                                                                                            |                                                                                                                                                                                                                                                    | 0,5                                                                                                      |
| Region 63                         | 94                                                                                                                                                                                       | 135                                                                                                             | 69,6                                                                                                                                                                                                                                                                                                                  | 0,6                                                                                                                                                                                                                                                                                                                        | 1                                                                                                                                                                                                                                                                                               | 1                                                                                                                                                                                                                                                                                                     | 1                                                                                                                                                                                                                                                                    | 844,4                                                                                                                                     | 763,04                                                                                                                         | 1                                                                                                                                                      | 1                                                                                                                                                              | 1                                                                                                                                                                                                                                                  | 4,6                                                                                                      |
| Region 64                         | 0                                                                                                                                                                                        | 38                                                                                                              | 0,0                                                                                                                                                                                                                                                                                                                   | 0,0                                                                                                                                                                                                                                                                                                                        | 0                                                                                                                                                                                                                                                                                               | 0                                                                                                                                                                                                                                                                                                     | 0                                                                                                                                                                                                                                                                    | 0                                                                                                                                         | 0                                                                                                                              | 0                                                                                                                                                      | 0,5                                                                                                                                                            | 0                                                                                                                                                                                                                                                  | 0,5                                                                                                      |
| Region 65                         | 190                                                                                                                                                                                      | 190                                                                                                             | 100,0                                                                                                                                                                                                                                                                                                                 | 1,0                                                                                                                                                                                                                                                                                                                        | 5                                                                                                                                                                                                                                                                                               | 0,7                                                                                                                                                                                                                                                                                                   | 0                                                                                                                                                                                                                                                                    | 217,9                                                                                                                                     | 216,3                                                                                                                          | 0,5                                                                                                                                                    | 1                                                                                                                                                              | 1                                                                                                                                                                                                                                                  | 3,7                                                                                                      |
| Region 66                         |                                                                                                                                                                                          |                                                                                                                 | 0,0                                                                                                                                                                                                                                                                                                                   | 0,0                                                                                                                                                                                                                                                                                                                        | 0                                                                                                                                                                                                                                                                                               | 0                                                                                                                                                                                                                                                                                                     |                                                                                                                                                                                                                                                                      |                                                                                                                                           |                                                                                                                                |                                                                                                                                                        | 0,5                                                                                                                                                            |                                                                                                                                                                                                                                                    | 0,5                                                                                                      |
| Region 67                         | 0                                                                                                                                                                                        | 36                                                                                                              | 0,0                                                                                                                                                                                                                                                                                                                   | 0,0                                                                                                                                                                                                                                                                                                                        | 6                                                                                                                                                                                                                                                                                               | 1                                                                                                                                                                                                                                                                                                     | 0                                                                                                                                                                                                                                                                    | 0                                                                                                                                         | 0                                                                                                                              | 0                                                                                                                                                      | 0,5                                                                                                                                                            | 0                                                                                                                                                                                                                                                  | 1,5                                                                                                      |
| Region 68                         | 9                                                                                                                                                                                        | 9                                                                                                               | 100,0                                                                                                                                                                                                                                                                                                                 | 1,0                                                                                                                                                                                                                                                                                                                        | 1                                                                                                                                                                                                                                                                                               | 1                                                                                                                                                                                                                                                                                                     | 1                                                                                                                                                                                                                                                                    | 824,043457                                                                                                                                | 689,012679                                                                                                                     | 0,2                                                                                                                                                    | 1                                                                                                                                                              | 1                                                                                                                                                                                                                                                  | 5,0                                                                                                      |
| Region 69                         |                                                                                                                                                                                          |                                                                                                                 | 0,0                                                                                                                                                                                                                                                                                                                   | 0,0                                                                                                                                                                                                                                                                                                                        | 0                                                                                                                                                                                                                                                                                               | 0                                                                                                                                                                                                                                                                                                     |                                                                                                                                                                                                                                                                      |                                                                                                                                           |                                                                                                                                |                                                                                                                                                        | 0,5                                                                                                                                                            |                                                                                                                                                                                                                                                    | 0,5                                                                                                      |
| Region 70                         | 35                                                                                                                                                                                       | 286                                                                                                             | 12,2                                                                                                                                                                                                                                                                                                                  | 0,1                                                                                                                                                                                                                                                                                                                        | 5                                                                                                                                                                                                                                                                                               | 0,7                                                                                                                                                                                                                                                                                                   | 1                                                                                                                                                                                                                                                                    | 20,6                                                                                                                                      | 13,6                                                                                                                           | 0,5                                                                                                                                                    | 1                                                                                                                                                              | 1                                                                                                                                                                                                                                                  | 3,8                                                                                                      |
| Region 71                         | 1                                                                                                                                                                                        | 75                                                                                                              | 1,3                                                                                                                                                                                                                                                                                                                   | 0,0                                                                                                                                                                                                                                                                                                                        | 1                                                                                                                                                                                                                                                                                               | 1                                                                                                                                                                                                                                                                                                     | 1                                                                                                                                                                                                                                                                    | 49,8025                                                                                                                                   | 45,9453                                                                                                                        | 0,1                                                                                                                                                    | 1                                                                                                                                                              | 0                                                                                                                                                                                                                                                  | 3,0                                                                                                      |
| Region 72                         | 35                                                                                                                                                                                       | 35                                                                                                              | 100,0                                                                                                                                                                                                                                                                                                                 | 1,0                                                                                                                                                                                                                                                                                                                        | 1                                                                                                                                                                                                                                                                                               | 1                                                                                                                                                                                                                                                                                                     | 1                                                                                                                                                                                                                                                                    | 105,084                                                                                                                                   | 105,1                                                                                                                          | 0,5                                                                                                                                                    | 0                                                                                                                                                              | 1                                                                                                                                                                                                                                                  | 4,0                                                                                                      |

**Indicators of the regional rehabilitation systems development in Russia (2018)**

| Regions of the Russian Federation | Number of organizations providing rehabilitation and (or) habilitation services and included in the regional system regarding to the formation an integrated approach to its arrangement | Total number of organizations providing rehabilitation and (or) habilitation services and located in the region | The share of organizations providing rehabilitation and (or) habilitation services and included in the regional system regarding to the formation an integrated approach to its arrangement in the total number of organizations providing rehabilitation and (or) habilitation services and located in the region, % | The share of organizations providing rehabilitation and (or) habilitation services and included in the regional system regarding to the formation an integrated approach to its arrangement in the total number of organizations providing rehabilitation and (or) habilitation services and located in the region, points | Number of regional agencies in various fields of activities (healthcare, education, social protection, physical culture and sports, culture, labor and employment, information and communication) involved in the formation of an integrated approach to the arrangement of the regional system | Number of regional agencies in various fields of activity (healthcare, education, social protection, physical culture and sports, culture, labor and employment, information and communication) involved in the formation of an integrated approach to the arrangement of the regional system, points | Availability of the legal and methodological base of the regional system for forming an integrated approach to its arrangement, agreements on interaction between providers of rehabilitation and (or) habilitation measures (presence – 1 point, absence – 0 point) | Funding allocated for rehabilitation and habilitation measures to meet the needs of the disabled in the assessment period, million rubles | Funding allocated for rehabilitation and habilitation measures to meet the needs of PwD in the previous period, million rubles | The share of changes in funding allocated for rehabilitation and habilitation measures to meet the needs of PwD in comparison with the previous period | The share of changes in funding allocated for rehabilitation and habilitation measures to meet the needs of PwD in comparison with the previous period, points | Availability of the feasible regional recommendations on options for the provision of rehabilitation and habilitation measures for PwD (plan approved by agencies, certificates, co-financing, and others) (presence - 1 point, absence - 0 point) | The formation of an integrated approach to the organization of the regional system in the region, points |
|-----------------------------------|------------------------------------------------------------------------------------------------------------------------------------------------------------------------------------------|-----------------------------------------------------------------------------------------------------------------|-----------------------------------------------------------------------------------------------------------------------------------------------------------------------------------------------------------------------------------------------------------------------------------------------------------------------|----------------------------------------------------------------------------------------------------------------------------------------------------------------------------------------------------------------------------------------------------------------------------------------------------------------------------|-------------------------------------------------------------------------------------------------------------------------------------------------------------------------------------------------------------------------------------------------------------------------------------------------|-------------------------------------------------------------------------------------------------------------------------------------------------------------------------------------------------------------------------------------------------------------------------------------------------------|----------------------------------------------------------------------------------------------------------------------------------------------------------------------------------------------------------------------------------------------------------------------|-------------------------------------------------------------------------------------------------------------------------------------------|--------------------------------------------------------------------------------------------------------------------------------|--------------------------------------------------------------------------------------------------------------------------------------------------------|----------------------------------------------------------------------------------------------------------------------------------------------------------------|----------------------------------------------------------------------------------------------------------------------------------------------------------------------------------------------------------------------------------------------------|----------------------------------------------------------------------------------------------------------|
| Region 73                         | 42                                                                                                                                                                                       | 128                                                                                                             | 32,8                                                                                                                                                                                                                                                                                                                  | 0,3                                                                                                                                                                                                                                                                                                                        | 1                                                                                                                                                                                                                                                                                               | 1                                                                                                                                                                                                                                                                                                     | 1                                                                                                                                                                                                                                                                    |                                                                                                                                           |                                                                                                                                | 1                                                                                                                                                      | 0,5                                                                                                                                                            | 0                                                                                                                                                                                                                                                  | 2,8                                                                                                      |
| Region 74                         |                                                                                                                                                                                          |                                                                                                                 | 0,0                                                                                                                                                                                                                                                                                                                   | 0,0                                                                                                                                                                                                                                                                                                                        | 0                                                                                                                                                                                                                                                                                               | 0                                                                                                                                                                                                                                                                                                     |                                                                                                                                                                                                                                                                      |                                                                                                                                           |                                                                                                                                |                                                                                                                                                        | 0,5                                                                                                                                                            |                                                                                                                                                                                                                                                    | 0,5                                                                                                      |
| Region 75                         | 75                                                                                                                                                                                       | 425                                                                                                             | 17,6                                                                                                                                                                                                                                                                                                                  | 0,1                                                                                                                                                                                                                                                                                                                        | 1                                                                                                                                                                                                                                                                                               | 1                                                                                                                                                                                                                                                                                                     | 1                                                                                                                                                                                                                                                                    |                                                                                                                                           |                                                                                                                                | 0,5                                                                                                                                                    | 0,5                                                                                                                                                            | 1                                                                                                                                                                                                                                                  | 3,6                                                                                                      |
| Region 76                         | 6                                                                                                                                                                                        | 6                                                                                                               | 100,0                                                                                                                                                                                                                                                                                                                 | 1,0                                                                                                                                                                                                                                                                                                                        | 1                                                                                                                                                                                                                                                                                               | 1                                                                                                                                                                                                                                                                                                     | 0                                                                                                                                                                                                                                                                    | 13,321                                                                                                                                    | 11,32                                                                                                                          | 0,18                                                                                                                                                   | 1                                                                                                                                                              | 0                                                                                                                                                                                                                                                  | 3,0                                                                                                      |
| Region 77                         |                                                                                                                                                                                          |                                                                                                                 | 0,0                                                                                                                                                                                                                                                                                                                   | 0,0                                                                                                                                                                                                                                                                                                                        | 0                                                                                                                                                                                                                                                                                               | 0                                                                                                                                                                                                                                                                                                     |                                                                                                                                                                                                                                                                      |                                                                                                                                           |                                                                                                                                |                                                                                                                                                        | 0,5                                                                                                                                                            |                                                                                                                                                                                                                                                    | 0,5                                                                                                      |
| Region 78                         |                                                                                                                                                                                          |                                                                                                                 | 0,0                                                                                                                                                                                                                                                                                                                   | 0,0                                                                                                                                                                                                                                                                                                                        | 5                                                                                                                                                                                                                                                                                               | 0,7                                                                                                                                                                                                                                                                                                   | 0                                                                                                                                                                                                                                                                    |                                                                                                                                           |                                                                                                                                | 0,5                                                                                                                                                    | 0,5                                                                                                                                                            | 0                                                                                                                                                                                                                                                  | 1,2                                                                                                      |
| Region 79                         |                                                                                                                                                                                          |                                                                                                                 | 0,0                                                                                                                                                                                                                                                                                                                   | 0,0                                                                                                                                                                                                                                                                                                                        | 1                                                                                                                                                                                                                                                                                               | 1                                                                                                                                                                                                                                                                                                     |                                                                                                                                                                                                                                                                      |                                                                                                                                           |                                                                                                                                | 1                                                                                                                                                      | 0,5                                                                                                                                                            | 1                                                                                                                                                                                                                                                  | 2,5                                                                                                      |
| Region 80                         | 54                                                                                                                                                                                       | 54                                                                                                              | 100,0                                                                                                                                                                                                                                                                                                                 | 1,0                                                                                                                                                                                                                                                                                                                        | 1                                                                                                                                                                                                                                                                                               | 1                                                                                                                                                                                                                                                                                                     | 1                                                                                                                                                                                                                                                                    | 1,6                                                                                                                                       | 0,3                                                                                                                            | 1                                                                                                                                                      | 1                                                                                                                                                              | 1                                                                                                                                                                                                                                                  | 5,0                                                                                                      |
| Region 81                         |                                                                                                                                                                                          |                                                                                                                 | 0,0                                                                                                                                                                                                                                                                                                                   | 0,0                                                                                                                                                                                                                                                                                                                        | 0                                                                                                                                                                                                                                                                                               | 0                                                                                                                                                                                                                                                                                                     |                                                                                                                                                                                                                                                                      |                                                                                                                                           |                                                                                                                                |                                                                                                                                                        | 0,5                                                                                                                                                            |                                                                                                                                                                                                                                                    | 0,5                                                                                                      |
| Region 82                         |                                                                                                                                                                                          | 303                                                                                                             | 0,0                                                                                                                                                                                                                                                                                                                   | 0,0                                                                                                                                                                                                                                                                                                                        | 3                                                                                                                                                                                                                                                                                               | 0,4                                                                                                                                                                                                                                                                                                   | 1                                                                                                                                                                                                                                                                    |                                                                                                                                           |                                                                                                                                | 1                                                                                                                                                      | 0,5                                                                                                                                                            | 1                                                                                                                                                                                                                                                  | 2,9                                                                                                      |
| Region 83                         | 354                                                                                                                                                                                      | 354                                                                                                             | 100,0                                                                                                                                                                                                                                                                                                                 | 1,0                                                                                                                                                                                                                                                                                                                        | 1                                                                                                                                                                                                                                                                                               | 1                                                                                                                                                                                                                                                                                                     | 1                                                                                                                                                                                                                                                                    |                                                                                                                                           |                                                                                                                                | 0                                                                                                                                                      | 0,5                                                                                                                                                            | 1                                                                                                                                                                                                                                                  | 4,5                                                                                                      |
| Region 84                         | 34                                                                                                                                                                                       | 34                                                                                                              | 100,0                                                                                                                                                                                                                                                                                                                 | 1,0                                                                                                                                                                                                                                                                                                                        | 5                                                                                                                                                                                                                                                                                               | 0,7                                                                                                                                                                                                                                                                                                   | 1                                                                                                                                                                                                                                                                    | 39,348489                                                                                                                                 | 42,144453                                                                                                                      | 0                                                                                                                                                      | 0                                                                                                                                                              | 1                                                                                                                                                                                                                                                  | 3,7                                                                                                      |
| Region 85                         |                                                                                                                                                                                          |                                                                                                                 | 0,0                                                                                                                                                                                                                                                                                                                   | 0,0                                                                                                                                                                                                                                                                                                                        | 0                                                                                                                                                                                                                                                                                               | 0                                                                                                                                                                                                                                                                                                     |                                                                                                                                                                                                                                                                      |                                                                                                                                           |                                                                                                                                |                                                                                                                                                        | 0,5                                                                                                                                                            |                                                                                                                                                                                                                                                    | 0,5                                                                                                      |

**Indicators of the regional rehabilitation systems development in Russia (2018)**

| Regions of the Russian Federation | Total number of PwD (their legal representatives) who were interviewed on the quality of the provision of rehabilitation and (or) habilitation services | Number of PwD (their legal representatives) who are satisfied with the quality of the provision of rehabilitation and (or) habilitation services | The share of PwD (their legal representatives) who are satisfied with the quality of the provision of rehabilitation and (or) habilitation services in the total number of interviewed PwD (their legal representatives), % | The share of PwD (their legal representatives) who are satisfied with the quality of the provision of rehabilitation and (or) habilitation services in the total number of interviewed PwD (their legal representatives), % | The share of PwD (their legal representatives) who are satisfied with the quality of the provision of rehabilitation and (or) habilitation services in the total number of interviewed PwD (their legal representatives), points | Total number of PwD (their legal representatives) who were interviewed to evaluate the system for the provision of rehabilitation and (or) habilitation services | Number of PwD (their legal representatives) who evaluate positively the system for the provision of rehabilitation and (or) habilitation services | The share of PwD (their legal representatives) who evaluate positively the system for the provision of rehabilitation and (or) habilitation services in the total number of interviewed PwD (their legal representatives), % | The share of PwD (their legal representatives) who evaluate positively the system for the provision of rehabilitation and (or) habilitation services in the total number of interviewed PwD (their legal representatives), % | The share of PwD (their legal representatives) who evaluate positively the system for the provision of rehabilitation and (or) habilitation services in the total number of interviewed PwD (their legal representatives), points | The satisfaction of PwD (their legal representatives) with rehabilitation or habilitation measures (services), points |
|-----------------------------------|---------------------------------------------------------------------------------------------------------------------------------------------------------|--------------------------------------------------------------------------------------------------------------------------------------------------|-----------------------------------------------------------------------------------------------------------------------------------------------------------------------------------------------------------------------------|-----------------------------------------------------------------------------------------------------------------------------------------------------------------------------------------------------------------------------|----------------------------------------------------------------------------------------------------------------------------------------------------------------------------------------------------------------------------------|------------------------------------------------------------------------------------------------------------------------------------------------------------------|---------------------------------------------------------------------------------------------------------------------------------------------------|------------------------------------------------------------------------------------------------------------------------------------------------------------------------------------------------------------------------------|------------------------------------------------------------------------------------------------------------------------------------------------------------------------------------------------------------------------------|-----------------------------------------------------------------------------------------------------------------------------------------------------------------------------------------------------------------------------------|-----------------------------------------------------------------------------------------------------------------------|
| Region 1                          | 100                                                                                                                                                     | 88,2                                                                                                                                             | 0,88                                                                                                                                                                                                                        | 88,2                                                                                                                                                                                                                        | 0,8                                                                                                                                                                                                                              | 100                                                                                                                                                              | 88,3                                                                                                                                              | 0,8                                                                                                                                                                                                                          | 88,3                                                                                                                                                                                                                         | 0,8                                                                                                                                                                                                                               | 1,6                                                                                                                   |
| Region 2                          |                                                                                                                                                         |                                                                                                                                                  | 0,40                                                                                                                                                                                                                        | 0,4                                                                                                                                                                                                                         | 0                                                                                                                                                                                                                                |                                                                                                                                                                  |                                                                                                                                                   | 0,5                                                                                                                                                                                                                          | 0,5                                                                                                                                                                                                                          | 0                                                                                                                                                                                                                                 | 0                                                                                                                     |
| Region 3                          | 350                                                                                                                                                     | 313                                                                                                                                              | 73,80                                                                                                                                                                                                                       | 89,4                                                                                                                                                                                                                        | 0,8                                                                                                                                                                                                                              | 350                                                                                                                                                              | 288                                                                                                                                               | 82,2                                                                                                                                                                                                                         | 82,3                                                                                                                                                                                                                         | 0,8                                                                                                                                                                                                                               | 1,6                                                                                                                   |
| Region 4                          |                                                                                                                                                         |                                                                                                                                                  | 71,50                                                                                                                                                                                                                       | 71,5                                                                                                                                                                                                                        | 0,7                                                                                                                                                                                                                              |                                                                                                                                                                  |                                                                                                                                                   | 61,3                                                                                                                                                                                                                         | 61,3                                                                                                                                                                                                                         | 0,6                                                                                                                                                                                                                               | 1,3                                                                                                                   |
| Region 5                          |                                                                                                                                                         |                                                                                                                                                  |                                                                                                                                                                                                                             | 0,0                                                                                                                                                                                                                         | 0                                                                                                                                                                                                                                |                                                                                                                                                                  |                                                                                                                                                   |                                                                                                                                                                                                                              | 0,0                                                                                                                                                                                                                          | 0                                                                                                                                                                                                                                 | 0                                                                                                                     |
| Region 6                          | 23685                                                                                                                                                   | 19239                                                                                                                                            | 0,80                                                                                                                                                                                                                        | 81,2                                                                                                                                                                                                                        | 0,8                                                                                                                                                                                                                              | 328                                                                                                                                                              | 144                                                                                                                                               | 0,4                                                                                                                                                                                                                          | 43,9                                                                                                                                                                                                                         | 0,4                                                                                                                                                                                                                               | 1,2                                                                                                                   |
| Region 7                          | 2383                                                                                                                                                    | 2167                                                                                                                                             | 90,90                                                                                                                                                                                                                       | 90,9                                                                                                                                                                                                                        | 0,9                                                                                                                                                                                                                              | 2383                                                                                                                                                             | 1940                                                                                                                                              | 81,4                                                                                                                                                                                                                         | 81,4                                                                                                                                                                                                                         | 0,8                                                                                                                                                                                                                               | 1,7                                                                                                                   |
| Region 8                          | 1220                                                                                                                                                    | 891                                                                                                                                              | 73,00                                                                                                                                                                                                                       | 73,0                                                                                                                                                                                                                        | 0,7                                                                                                                                                                                                                              | 1220                                                                                                                                                             | 1170                                                                                                                                              | 95,9                                                                                                                                                                                                                         | 95,9                                                                                                                                                                                                                         | 0,9                                                                                                                                                                                                                               | 1,6                                                                                                                   |
| Region 9                          | 34000                                                                                                                                                   | 29600                                                                                                                                            | 0,87                                                                                                                                                                                                                        | 87,1                                                                                                                                                                                                                        | 0,8                                                                                                                                                                                                                              | 34000                                                                                                                                                            | 29600                                                                                                                                             | 87,10%                                                                                                                                                                                                                       | 87,1                                                                                                                                                                                                                         | 0,8                                                                                                                                                                                                                               | 1,6                                                                                                                   |
| Region 10                         | 600                                                                                                                                                     | 243                                                                                                                                              | 0,40                                                                                                                                                                                                                        | 40,5                                                                                                                                                                                                                        | 0,4                                                                                                                                                                                                                              | 600                                                                                                                                                              | 243                                                                                                                                               | 0,4                                                                                                                                                                                                                          | 40,5                                                                                                                                                                                                                         | 0,4                                                                                                                                                                                                                               | 0,8                                                                                                                   |
| Region 11                         | 9425                                                                                                                                                    | 4649                                                                                                                                             | 49,30                                                                                                                                                                                                                       | 49,3                                                                                                                                                                                                                        | 0,4                                                                                                                                                                                                                              | 8930                                                                                                                                                             | 4189                                                                                                                                              | 46,9                                                                                                                                                                                                                         | 46,9                                                                                                                                                                                                                         | 0,4                                                                                                                                                                                                                               | 0,8                                                                                                                   |
| Region 12                         | 1099                                                                                                                                                    | 987                                                                                                                                              | 89,80                                                                                                                                                                                                                       | 89,8                                                                                                                                                                                                                        | 0,8                                                                                                                                                                                                                              | 1049                                                                                                                                                             | 944                                                                                                                                               | 90                                                                                                                                                                                                                           | 90,0                                                                                                                                                                                                                         | 0                                                                                                                                                                                                                                 | 0,8                                                                                                                   |
| Region 13                         | 1042                                                                                                                                                    | 1003                                                                                                                                             | 0,90                                                                                                                                                                                                                        | 96,3                                                                                                                                                                                                                        | 0,9                                                                                                                                                                                                                              | 1042                                                                                                                                                             | 1003                                                                                                                                              | 0,9                                                                                                                                                                                                                          | 96,3                                                                                                                                                                                                                         | 0,9                                                                                                                                                                                                                               | 1,8                                                                                                                   |
| Region 14                         | 10260                                                                                                                                                   | 9492                                                                                                                                             | 92,50                                                                                                                                                                                                                       | 92,5                                                                                                                                                                                                                        | 0,9                                                                                                                                                                                                                              | 9106                                                                                                                                                             | 8465                                                                                                                                              | 92,9                                                                                                                                                                                                                         | 93,0                                                                                                                                                                                                                         | 0,9                                                                                                                                                                                                                               | 1,8                                                                                                                   |
| Region 15                         | 2987                                                                                                                                                    | 2714                                                                                                                                             | 90,90                                                                                                                                                                                                                       | 90,9                                                                                                                                                                                                                        | 0,9                                                                                                                                                                                                                              | 354                                                                                                                                                              | 285                                                                                                                                               | 80,5                                                                                                                                                                                                                         | 80,5                                                                                                                                                                                                                         | 0,8                                                                                                                                                                                                                               | 1,7                                                                                                                   |
| Region 16                         |                                                                                                                                                         | 17747                                                                                                                                            | 0,90                                                                                                                                                                                                                        | 0,0                                                                                                                                                                                                                         | 0                                                                                                                                                                                                                                |                                                                                                                                                                  | 17700                                                                                                                                             | 0,9                                                                                                                                                                                                                          | 0,0                                                                                                                                                                                                                          | 0                                                                                                                                                                                                                                 | 0                                                                                                                     |
| Region 17                         | 23980                                                                                                                                                   | 22330                                                                                                                                            | 93,00                                                                                                                                                                                                                       | 93,1                                                                                                                                                                                                                        | 0,9                                                                                                                                                                                                                              | 23980                                                                                                                                                            | 22330                                                                                                                                             | 93                                                                                                                                                                                                                           | 93,1                                                                                                                                                                                                                         | 0,9                                                                                                                                                                                                                               | 1,8                                                                                                                   |
| Region 18                         | 7390                                                                                                                                                    | 7304                                                                                                                                             | 98,80                                                                                                                                                                                                                       | 98,8                                                                                                                                                                                                                        | 0,9                                                                                                                                                                                                                              | 4487                                                                                                                                                             | 4437                                                                                                                                              | 98,8                                                                                                                                                                                                                         | 98,9                                                                                                                                                                                                                         | 0,9                                                                                                                                                                                                                               | 1,8                                                                                                                   |
| Region 19                         | 125                                                                                                                                                     | 105                                                                                                                                              | 84,00                                                                                                                                                                                                                       | 84,0                                                                                                                                                                                                                        | 0,8                                                                                                                                                                                                                              | 125                                                                                                                                                              | 102                                                                                                                                               | 81                                                                                                                                                                                                                           | 81,6                                                                                                                                                                                                                         | 0,8                                                                                                                                                                                                                               | 1,6                                                                                                                   |
| Region 20                         | 13763                                                                                                                                                   | 13551                                                                                                                                            | 98,50                                                                                                                                                                                                                       | 98,5                                                                                                                                                                                                                        | 0,9                                                                                                                                                                                                                              | 7419                                                                                                                                                             | 7291                                                                                                                                              | 98,3                                                                                                                                                                                                                         | 98,3                                                                                                                                                                                                                         | 0,9                                                                                                                                                                                                                               | 1,8                                                                                                                   |
| Region 21                         | 51752                                                                                                                                                   | 41919                                                                                                                                            | 81,00                                                                                                                                                                                                                       | 81,0                                                                                                                                                                                                                        | 0,8                                                                                                                                                                                                                              | 51752                                                                                                                                                            | 42747                                                                                                                                             | 82,6                                                                                                                                                                                                                         | 82,6                                                                                                                                                                                                                         | 0,8                                                                                                                                                                                                                               | 1,6                                                                                                                   |
| Region 22                         | 43952                                                                                                                                                   | 29009                                                                                                                                            | 0,70                                                                                                                                                                                                                        | 66,0                                                                                                                                                                                                                        | 0,6                                                                                                                                                                                                                              | 17712                                                                                                                                                            | 15658                                                                                                                                             | 0,8                                                                                                                                                                                                                          | 88,4                                                                                                                                                                                                                         | 0,8                                                                                                                                                                                                                               | 1,4                                                                                                                   |
| Region 23                         | 2454                                                                                                                                                    | 1583                                                                                                                                             | 52,00                                                                                                                                                                                                                       | 64,5                                                                                                                                                                                                                        | 0,6                                                                                                                                                                                                                              | 2454                                                                                                                                                             | 1583                                                                                                                                              | 31,2                                                                                                                                                                                                                         | 64,5                                                                                                                                                                                                                         | 0,6                                                                                                                                                                                                                               | 1,2                                                                                                                   |
| Region 24                         | 0                                                                                                                                                       | 0                                                                                                                                                | 0,00                                                                                                                                                                                                                        | 0,0                                                                                                                                                                                                                         | 0                                                                                                                                                                                                                                | 0                                                                                                                                                                | 0                                                                                                                                                 | 0                                                                                                                                                                                                                            | 0,0                                                                                                                                                                                                                          | 0                                                                                                                                                                                                                                 | 0                                                                                                                     |

**Indicators of the regional rehabilitation systems development in Russia (2018)**

| Regions of the Russian Federation | Total number of PwD (their legal representatives) who were interviewed on the quality of the provision of rehabilitation and (or) habilitation services | Number of PwD (their legal representatives) who are satisfied with the quality of the provision of rehabilitation and (or) habilitation services | The share of PwD (their legal representatives) who are satisfied with the quality of the provision of rehabilitation and (or) habilitation services in the total number of interviewed PwD (their legal representatives), % | The share of PwD (their legal representatives) who are satisfied with the quality of the provision of rehabilitation and (or) habilitation services in the total number of interviewed PwD (their legal representatives), % | The share of PwD (their legal representatives) who are satisfied with the quality of the provision of rehabilitation and (or) habilitation services in the total number of interviewed PwD (their legal representatives), points | Total number of PwD (their legal representatives) who were interviewed to evaluate the system for the provision of rehabilitation and (or) habilitation services | Number of PwD (their legal representatives) who evaluate positively the system for the provision of rehabilitation and (or) habilitation services | The share of PwD (their legal representatives) who evaluate positively the system for the provision of rehabilitation and (or) habilitation services in the total number of interviewed PwD (their legal representatives), % | The share of PwD (their legal representatives) who evaluate positively the system for the provision of rehabilitation and (or) habilitation services in the total number of interviewed PwD (their legal representatives), % | The share of PwD (their legal representatives) who evaluate positively the system for the provision of rehabilitation and (or) habilitation services in the total number of interviewed PwD (their legal representatives), points | The satisfaction of PwD (their legal representatives) with rehabilitation or habilitation measures (services), points |
|-----------------------------------|---------------------------------------------------------------------------------------------------------------------------------------------------------|--------------------------------------------------------------------------------------------------------------------------------------------------|-----------------------------------------------------------------------------------------------------------------------------------------------------------------------------------------------------------------------------|-----------------------------------------------------------------------------------------------------------------------------------------------------------------------------------------------------------------------------|----------------------------------------------------------------------------------------------------------------------------------------------------------------------------------------------------------------------------------|------------------------------------------------------------------------------------------------------------------------------------------------------------------|---------------------------------------------------------------------------------------------------------------------------------------------------|------------------------------------------------------------------------------------------------------------------------------------------------------------------------------------------------------------------------------|------------------------------------------------------------------------------------------------------------------------------------------------------------------------------------------------------------------------------|-----------------------------------------------------------------------------------------------------------------------------------------------------------------------------------------------------------------------------------|-----------------------------------------------------------------------------------------------------------------------|
| Region 25                         | 17718                                                                                                                                                   | 9831                                                                                                                                             | 55,00                                                                                                                                                                                                                       | 55,5                                                                                                                                                                                                                        | 0,5                                                                                                                                                                                                                              | 17718                                                                                                                                                            | 7887                                                                                                                                              | 45                                                                                                                                                                                                                           | 44,5                                                                                                                                                                                                                         | 0,4                                                                                                                                                                                                                               | 0,9                                                                                                                   |
| Region 26                         | 882                                                                                                                                                     | 756                                                                                                                                              | 85,70                                                                                                                                                                                                                       | 85,7                                                                                                                                                                                                                        | 0,8                                                                                                                                                                                                                              | 98                                                                                                                                                               | 98                                                                                                                                                | 100                                                                                                                                                                                                                          | 100,0                                                                                                                                                                                                                        | 1                                                                                                                                                                                                                                 | 1,8                                                                                                                   |
| Region 27                         |                                                                                                                                                         |                                                                                                                                                  |                                                                                                                                                                                                                             | 0,0                                                                                                                                                                                                                         | 0                                                                                                                                                                                                                                |                                                                                                                                                                  |                                                                                                                                                   | 0,7                                                                                                                                                                                                                          | 0,7                                                                                                                                                                                                                          | 0                                                                                                                                                                                                                                 | 0                                                                                                                     |
| Region 28                         | 4216                                                                                                                                                    | 3752                                                                                                                                             | 89,00                                                                                                                                                                                                                       | 89,0                                                                                                                                                                                                                        | 0,8                                                                                                                                                                                                                              | 4135                                                                                                                                                             | 3902                                                                                                                                              | 94,4                                                                                                                                                                                                                         | 94,4                                                                                                                                                                                                                         | 0,9                                                                                                                                                                                                                               | 1,7                                                                                                                   |
| Region 29                         |                                                                                                                                                         |                                                                                                                                                  | 0,80                                                                                                                                                                                                                        | 0,8                                                                                                                                                                                                                         | 0                                                                                                                                                                                                                                |                                                                                                                                                                  |                                                                                                                                                   | 0,7                                                                                                                                                                                                                          | 0,7                                                                                                                                                                                                                          | 0                                                                                                                                                                                                                                 | 0                                                                                                                     |
| Region 30                         | 7064                                                                                                                                                    | 4309                                                                                                                                             | 61,00                                                                                                                                                                                                                       | 61,0                                                                                                                                                                                                                        | 0,6                                                                                                                                                                                                                              | 6940                                                                                                                                                             | 3262                                                                                                                                              | 47                                                                                                                                                                                                                           | 47,0                                                                                                                                                                                                                         | 0,4                                                                                                                                                                                                                               | 1                                                                                                                     |
| Region 31                         | 703                                                                                                                                                     | 703                                                                                                                                              | 100,00                                                                                                                                                                                                                      | 100,0                                                                                                                                                                                                                       | 1                                                                                                                                                                                                                                | 703                                                                                                                                                              | 703                                                                                                                                               | 100                                                                                                                                                                                                                          | 100,0                                                                                                                                                                                                                        | 1                                                                                                                                                                                                                                 | 2                                                                                                                     |
| Region 32                         |                                                                                                                                                         |                                                                                                                                                  |                                                                                                                                                                                                                             | 0,0                                                                                                                                                                                                                         | 0                                                                                                                                                                                                                                |                                                                                                                                                                  |                                                                                                                                                   |                                                                                                                                                                                                                              | 0,0                                                                                                                                                                                                                          | 0                                                                                                                                                                                                                                 | 0                                                                                                                     |
| Region 33                         | 8400                                                                                                                                                    | 7163                                                                                                                                             | 0,80                                                                                                                                                                                                                        | 85,3                                                                                                                                                                                                                        | 0,8                                                                                                                                                                                                                              | 8400                                                                                                                                                             | 7875                                                                                                                                              | 0,9                                                                                                                                                                                                                          | 93,8                                                                                                                                                                                                                         | 0,9                                                                                                                                                                                                                               | 1,7                                                                                                                   |
| Region 34                         | 550                                                                                                                                                     | 368                                                                                                                                              | 67,00                                                                                                                                                                                                                       | 66,9                                                                                                                                                                                                                        | 0,6                                                                                                                                                                                                                              | 550                                                                                                                                                              | 296                                                                                                                                               | 53                                                                                                                                                                                                                           | 53,8                                                                                                                                                                                                                         | 0,5                                                                                                                                                                                                                               | 1,1                                                                                                                   |
| Region 35                         | 2053                                                                                                                                                    | 2053                                                                                                                                             | 100,00                                                                                                                                                                                                                      | 100,0                                                                                                                                                                                                                       | 1                                                                                                                                                                                                                                | 2053                                                                                                                                                             | 1992                                                                                                                                              | 97                                                                                                                                                                                                                           | 97,0                                                                                                                                                                                                                         | 0,9                                                                                                                                                                                                                               | 1,9                                                                                                                   |
| Region 36                         | 3673                                                                                                                                                    | 3317                                                                                                                                             | 90,00                                                                                                                                                                                                                       | 90,3                                                                                                                                                                                                                        | 0,9                                                                                                                                                                                                                              | 3673                                                                                                                                                             | 1468                                                                                                                                              | 40                                                                                                                                                                                                                           | 40,0                                                                                                                                                                                                                         | 0                                                                                                                                                                                                                                 | 0,9                                                                                                                   |
| Region 37                         | 789                                                                                                                                                     | 647                                                                                                                                              | 82,00                                                                                                                                                                                                                       | 82,0                                                                                                                                                                                                                        | 0,8                                                                                                                                                                                                                              | 788                                                                                                                                                              | 622                                                                                                                                               | 78,9                                                                                                                                                                                                                         | 78,9                                                                                                                                                                                                                         | 0,7                                                                                                                                                                                                                               | 1,5                                                                                                                   |
| Region 38                         | 1298                                                                                                                                                    | 1267                                                                                                                                             | 0,90                                                                                                                                                                                                                        | 97,6                                                                                                                                                                                                                        | 0,9                                                                                                                                                                                                                              | 1298                                                                                                                                                             | 1237                                                                                                                                              | 0,9                                                                                                                                                                                                                          | 95,3                                                                                                                                                                                                                         | 0,9                                                                                                                                                                                                                               | 1,8                                                                                                                   |
| Region 39                         | 33000                                                                                                                                                   | 17094                                                                                                                                            | 51,80                                                                                                                                                                                                                       | 51,8                                                                                                                                                                                                                        | 0,5                                                                                                                                                                                                                              | 33000                                                                                                                                                            | 16995                                                                                                                                             | 51,5                                                                                                                                                                                                                         | 51,5                                                                                                                                                                                                                         | 0,5                                                                                                                                                                                                                               | 1                                                                                                                     |
| Region 40                         | 825                                                                                                                                                     | 787                                                                                                                                              | 95,40                                                                                                                                                                                                                       | 95,4                                                                                                                                                                                                                        | 0,9                                                                                                                                                                                                                              | 825                                                                                                                                                              | 762                                                                                                                                               | 92,4                                                                                                                                                                                                                         | 92,4                                                                                                                                                                                                                         | 0,9                                                                                                                                                                                                                               | 1,8                                                                                                                   |
| Region 41                         | 11744                                                                                                                                                   | 10570                                                                                                                                            | 90,00                                                                                                                                                                                                                       | 90,0                                                                                                                                                                                                                        | 0,9                                                                                                                                                                                                                              | 11744                                                                                                                                                            | 10452                                                                                                                                             | 89                                                                                                                                                                                                                           | 89,0                                                                                                                                                                                                                         | 0,8                                                                                                                                                                                                                               | 1,7                                                                                                                   |
| Region 42                         |                                                                                                                                                         |                                                                                                                                                  |                                                                                                                                                                                                                             | 0,0                                                                                                                                                                                                                         | 0                                                                                                                                                                                                                                |                                                                                                                                                                  |                                                                                                                                                   |                                                                                                                                                                                                                              | 0,0                                                                                                                                                                                                                          | 0                                                                                                                                                                                                                                 | 0                                                                                                                     |
| Region 43                         | 0                                                                                                                                                       | 0                                                                                                                                                | 0,00                                                                                                                                                                                                                        | 0,0                                                                                                                                                                                                                         | 0                                                                                                                                                                                                                                | 0                                                                                                                                                                | 0                                                                                                                                                 | 0                                                                                                                                                                                                                            | 0,0                                                                                                                                                                                                                          | 0                                                                                                                                                                                                                                 | 0                                                                                                                     |
| Region 44                         | 12962                                                                                                                                                   | 12870                                                                                                                                            | 0,99                                                                                                                                                                                                                        | 99,3                                                                                                                                                                                                                        | 0,9                                                                                                                                                                                                                              | 9069                                                                                                                                                             | 9023                                                                                                                                              | 99,49                                                                                                                                                                                                                        | 99,5                                                                                                                                                                                                                         | 0,9                                                                                                                                                                                                                               | 1,8                                                                                                                   |
| Region 45                         | 1100                                                                                                                                                    | 1095                                                                                                                                             | 99,50                                                                                                                                                                                                                       | 99,5                                                                                                                                                                                                                        | 0,9                                                                                                                                                                                                                              | 1100                                                                                                                                                             | 1075                                                                                                                                              | 97,7                                                                                                                                                                                                                         | 97,7                                                                                                                                                                                                                         | 0,9                                                                                                                                                                                                                               | 1,8                                                                                                                   |
| Region 46                         |                                                                                                                                                         |                                                                                                                                                  | 64,80                                                                                                                                                                                                                       | 64,8                                                                                                                                                                                                                        | 0,6                                                                                                                                                                                                                              |                                                                                                                                                                  |                                                                                                                                                   | 54,1                                                                                                                                                                                                                         | 54,1                                                                                                                                                                                                                         | 0,5                                                                                                                                                                                                                               | 1,1                                                                                                                   |
| Region 47                         | 3537                                                                                                                                                    | 3533                                                                                                                                             | 0,90                                                                                                                                                                                                                        | 99,9                                                                                                                                                                                                                        | 0,9                                                                                                                                                                                                                              | 3537                                                                                                                                                             | 3533                                                                                                                                              | 0,9                                                                                                                                                                                                                          | 99,9                                                                                                                                                                                                                         | 0,9                                                                                                                                                                                                                               | 1,8                                                                                                                   |

**Indicators of the regional rehabilitation systems development in Russia (2018)**

| Regions of the Russian Federation | Total number of PwD (their legal representatives) who were interviewed on the quality of the provision of rehabilitation and (or) habilitation services | Number of PwD (their legal representatives) who are satisfied with the quality of the provision of rehabilitation and (or) habilitation services | The share of PwD (their legal representatives) who are satisfied with the quality of the provision of rehabilitation and (or) habilitation services in the total number of interviewed PwD (their legal representatives), % | The share of PwD (their legal representatives) who are satisfied with the quality of the provision of rehabilitation and (or) habilitation services in the total number of interviewed PwD (their legal representatives), % | The share of PwD (their legal representatives) who are satisfied with the quality of the provision of rehabilitation and (or) habilitation services in the total number of interviewed PwD (their legal representatives), points | Total number of PwD (their legal representatives) who were interviewed to evaluate the system for the provision of rehabilitation and (or) habilitation services | Number of PwD (their legal representatives) who evaluate positively the system for the provision of rehabilitation and (or) habilitation services | The share of PwD (their legal representatives) who evaluate positively the system for the provision of rehabilitation and (or) habilitation services in the total number of interviewed PwD (their legal representatives), % | The share of PwD (their legal representatives) who evaluate positively the system for the provision of rehabilitation and (or) habilitation services in the total number of interviewed PwD (their legal representatives), % | The share of PwD (their legal representatives) who evaluate positively the system for the provision of rehabilitation and (or) habilitation services in the total number of interviewed PwD (their legal representatives), points | The satisfaction of PwD (their legal representatives) with rehabilitation or habilitation measures (services), points |
|-----------------------------------|---------------------------------------------------------------------------------------------------------------------------------------------------------|--------------------------------------------------------------------------------------------------------------------------------------------------|-----------------------------------------------------------------------------------------------------------------------------------------------------------------------------------------------------------------------------|-----------------------------------------------------------------------------------------------------------------------------------------------------------------------------------------------------------------------------|----------------------------------------------------------------------------------------------------------------------------------------------------------------------------------------------------------------------------------|------------------------------------------------------------------------------------------------------------------------------------------------------------------|---------------------------------------------------------------------------------------------------------------------------------------------------|------------------------------------------------------------------------------------------------------------------------------------------------------------------------------------------------------------------------------|------------------------------------------------------------------------------------------------------------------------------------------------------------------------------------------------------------------------------|-----------------------------------------------------------------------------------------------------------------------------------------------------------------------------------------------------------------------------------|-----------------------------------------------------------------------------------------------------------------------|
| Region 48                         | 9199                                                                                                                                                    | 8455                                                                                                                                             | 91,90                                                                                                                                                                                                                       | 91,9                                                                                                                                                                                                                        | 0,9                                                                                                                                                                                                                              | 8932                                                                                                                                                             | 8188                                                                                                                                              | 91,7                                                                                                                                                                                                                         | 91,7                                                                                                                                                                                                                         | 0,9                                                                                                                                                                                                                               | 1,8                                                                                                                   |
| Region 49                         | 2037                                                                                                                                                    | 1957                                                                                                                                             | 96,10                                                                                                                                                                                                                       | 96,1                                                                                                                                                                                                                        | 0,9                                                                                                                                                                                                                              | 2037                                                                                                                                                             | 1930                                                                                                                                              | 94,7                                                                                                                                                                                                                         | 94,7                                                                                                                                                                                                                         | 0,9                                                                                                                                                                                                                               | 1,8                                                                                                                   |
| Region 50                         |                                                                                                                                                         |                                                                                                                                                  | 93,00                                                                                                                                                                                                                       | 93,0                                                                                                                                                                                                                        | 0,9                                                                                                                                                                                                                              |                                                                                                                                                                  |                                                                                                                                                   | 93                                                                                                                                                                                                                           | 93,0                                                                                                                                                                                                                         | 0,9                                                                                                                                                                                                                               | 1,8                                                                                                                   |
| Region 51                         | 1514                                                                                                                                                    | 1246                                                                                                                                             | 82,00                                                                                                                                                                                                                       | 82,3                                                                                                                                                                                                                        | 0,8                                                                                                                                                                                                                              | 1514                                                                                                                                                             | 1027                                                                                                                                              | 68                                                                                                                                                                                                                           | 67,8                                                                                                                                                                                                                         | 0,6                                                                                                                                                                                                                               | 1,4                                                                                                                   |
| Region 52                         | 111                                                                                                                                                     | 92                                                                                                                                               | 82,90                                                                                                                                                                                                                       | 82,9                                                                                                                                                                                                                        | 0,8                                                                                                                                                                                                                              | 111                                                                                                                                                              | 90                                                                                                                                                | 81,1                                                                                                                                                                                                                         | 81,1                                                                                                                                                                                                                         | 0,8                                                                                                                                                                                                                               | 1,6                                                                                                                   |
| Region 53                         | 210                                                                                                                                                     | 210                                                                                                                                              | 100,00                                                                                                                                                                                                                      | 100,0                                                                                                                                                                                                                       | 1                                                                                                                                                                                                                                | 210                                                                                                                                                              | 210                                                                                                                                               | 100                                                                                                                                                                                                                          | 100,0                                                                                                                                                                                                                        | 1                                                                                                                                                                                                                                 | 2                                                                                                                     |
| Region 54                         |                                                                                                                                                         |                                                                                                                                                  |                                                                                                                                                                                                                             | 0,0                                                                                                                                                                                                                         | 0                                                                                                                                                                                                                                |                                                                                                                                                                  |                                                                                                                                                   |                                                                                                                                                                                                                              | 0,0                                                                                                                                                                                                                          | 0                                                                                                                                                                                                                                 | 0                                                                                                                     |
| Region 55                         |                                                                                                                                                         |                                                                                                                                                  | 97,20                                                                                                                                                                                                                       | 97,2                                                                                                                                                                                                                        | 0,9                                                                                                                                                                                                                              |                                                                                                                                                                  |                                                                                                                                                   | 9720,00%                                                                                                                                                                                                                     | 97,2                                                                                                                                                                                                                         | 0,9                                                                                                                                                                                                                               | 1,8                                                                                                                   |
| Region 56                         |                                                                                                                                                         |                                                                                                                                                  | 0,00                                                                                                                                                                                                                        | 0,0                                                                                                                                                                                                                         | 0                                                                                                                                                                                                                                |                                                                                                                                                                  |                                                                                                                                                   | 0                                                                                                                                                                                                                            | 0,0                                                                                                                                                                                                                          | 0                                                                                                                                                                                                                                 | 0                                                                                                                     |
| Region 57                         | 2326                                                                                                                                                    | 2326                                                                                                                                             | 100,00                                                                                                                                                                                                                      | 100,0                                                                                                                                                                                                                       | 1                                                                                                                                                                                                                                | 2476                                                                                                                                                             | 2474                                                                                                                                              | 0,999                                                                                                                                                                                                                        | 99,9                                                                                                                                                                                                                         | 0                                                                                                                                                                                                                                 | 1                                                                                                                     |
| Region 58                         | 4771                                                                                                                                                    | 4195                                                                                                                                             | 87,90                                                                                                                                                                                                                       | 87,9                                                                                                                                                                                                                        | 0,8                                                                                                                                                                                                                              | 4954                                                                                                                                                             | 4367                                                                                                                                              | 88,2                                                                                                                                                                                                                         | 88,2                                                                                                                                                                                                                         | 0,8                                                                                                                                                                                                                               | 1,6                                                                                                                   |
| Region 59                         | 3469                                                                                                                                                    | 3258                                                                                                                                             | 94,00                                                                                                                                                                                                                       | 93,9                                                                                                                                                                                                                        | 0,9                                                                                                                                                                                                                              | 3469                                                                                                                                                             | 3326                                                                                                                                              | 96                                                                                                                                                                                                                           | 95,9                                                                                                                                                                                                                         | 0,9                                                                                                                                                                                                                               | 1,8                                                                                                                   |
| Region 60                         | 16595                                                                                                                                                   | 13905                                                                                                                                            | 84,00                                                                                                                                                                                                                       | 83,8                                                                                                                                                                                                                        | 0,8                                                                                                                                                                                                                              | 16595                                                                                                                                                            | 12428                                                                                                                                             | 75                                                                                                                                                                                                                           | 74,9                                                                                                                                                                                                                         | 0,7                                                                                                                                                                                                                               | 1,5                                                                                                                   |
| Region 61                         |                                                                                                                                                         |                                                                                                                                                  | 0,90                                                                                                                                                                                                                        | 0,9                                                                                                                                                                                                                         | 0                                                                                                                                                                                                                                |                                                                                                                                                                  |                                                                                                                                                   | 0,9                                                                                                                                                                                                                          | 0,9                                                                                                                                                                                                                          | 0                                                                                                                                                                                                                                 | 0                                                                                                                     |
| Region 62                         |                                                                                                                                                         |                                                                                                                                                  |                                                                                                                                                                                                                             | 0,0                                                                                                                                                                                                                         | 0                                                                                                                                                                                                                                |                                                                                                                                                                  |                                                                                                                                                   |                                                                                                                                                                                                                              | 0,0                                                                                                                                                                                                                          | 0                                                                                                                                                                                                                                 | 0                                                                                                                     |
| Region 63                         | 16931                                                                                                                                                   | 6772                                                                                                                                             | 40,00                                                                                                                                                                                                                       | 40,0                                                                                                                                                                                                                        | 0                                                                                                                                                                                                                                | 15717                                                                                                                                                            | 6287                                                                                                                                              | 40                                                                                                                                                                                                                           | 40,0                                                                                                                                                                                                                         | 0,4                                                                                                                                                                                                                               | 0,4                                                                                                                   |
| Region 64                         | 300                                                                                                                                                     | 57                                                                                                                                               | 19,00                                                                                                                                                                                                                       | 19,0                                                                                                                                                                                                                        | 0,1                                                                                                                                                                                                                              |                                                                                                                                                                  |                                                                                                                                                   |                                                                                                                                                                                                                              | 0,0                                                                                                                                                                                                                          | 0                                                                                                                                                                                                                                 | 0,1                                                                                                                   |
| Region 65                         | 1237                                                                                                                                                    | 1196                                                                                                                                             | 97,00                                                                                                                                                                                                                       | 96,7                                                                                                                                                                                                                        | 0,9                                                                                                                                                                                                                              | 670                                                                                                                                                              | 670                                                                                                                                               | 100                                                                                                                                                                                                                          | 100,0                                                                                                                                                                                                                        | 1                                                                                                                                                                                                                                 | 1,9                                                                                                                   |
| Region 66                         | 1120                                                                                                                                                    | 984                                                                                                                                              | 87,80                                                                                                                                                                                                                       | 87,9                                                                                                                                                                                                                        | 0,8                                                                                                                                                                                                                              | 1120                                                                                                                                                             | 796                                                                                                                                               | 71,1                                                                                                                                                                                                                         | 71,1                                                                                                                                                                                                                         | 0,7                                                                                                                                                                                                                               | 1,5                                                                                                                   |
| Region 67                         | 8817                                                                                                                                                    | 8497                                                                                                                                             | 97,00                                                                                                                                                                                                                       | 96,4                                                                                                                                                                                                                        | 0,9                                                                                                                                                                                                                              | 7329                                                                                                                                                             | 7194                                                                                                                                              | 98                                                                                                                                                                                                                           | 98,2                                                                                                                                                                                                                         | 0,9                                                                                                                                                                                                                               | 1,8                                                                                                                   |
| Region 68                         |                                                                                                                                                         |                                                                                                                                                  |                                                                                                                                                                                                                             | 0,0                                                                                                                                                                                                                         | 0                                                                                                                                                                                                                                |                                                                                                                                                                  |                                                                                                                                                   |                                                                                                                                                                                                                              | 0,0                                                                                                                                                                                                                          | 0                                                                                                                                                                                                                                 | 0                                                                                                                     |
| Region 69                         | 929                                                                                                                                                     | 706                                                                                                                                              | 76/0,7                                                                                                                                                                                                                      | 76,0                                                                                                                                                                                                                        | 0,7                                                                                                                                                                                                                              | 0                                                                                                                                                                | 0                                                                                                                                                 | 0                                                                                                                                                                                                                            | 0,0                                                                                                                                                                                                                          | 0                                                                                                                                                                                                                                 | 0,7                                                                                                                   |
| Region 70                         | 330                                                                                                                                                     | 271                                                                                                                                              | 82,1                                                                                                                                                                                                                        | 82,1                                                                                                                                                                                                                        | 0,8                                                                                                                                                                                                                              | 330                                                                                                                                                              | 211                                                                                                                                               | 63,9                                                                                                                                                                                                                         | 63,9                                                                                                                                                                                                                         | 0,6                                                                                                                                                                                                                               | 1,4                                                                                                                   |

**Indicators of the regional rehabilitation systems development in Russia (2018)**

| Regions of the Russian Federation | Total number of PwD (their legal representatives) who were interviewed on the quality of the provision of rehabilitation and (or) habilitation services | Number of PwD (their legal representatives) who are satisfied with the quality of the provision of rehabilitation and (or) habilitation services | The share of PwD (their legal representatives) who are satisfied with the quality of the provision of rehabilitation and (or) habilitation services in the total number of interviewed PwD (their legal representatives), % | The share of PwD (their legal representatives) who are satisfied with the quality of the provision of rehabilitation and (or) habilitation services in the total number of interviewed PwD (their legal representatives), % | The share of PwD (their legal representatives) who are satisfied with the quality of the provision of rehabilitation and (or) habilitation services in the total number of interviewed PwD (their legal representatives), points | Total number of PwD (their legal representatives) who were interviewed to evaluate the system for the provision of rehabilitation and (or) habilitation services | Number of PwD (their legal representatives) who evaluate positively the system for the provision of rehabilitation and (or) habilitation services | The share of PwD (their legal representatives) who evaluate positively the system for the provision of rehabilitation and (or) habilitation services in the total number of interviewed PwD (their legal representatives), % | The share of PwD (their legal representatives) who evaluate positively the system for the provision of rehabilitation and (or) habilitation services in the total number of interviewed PwD (their legal representatives), % | The share of PwD (their legal representatives) who evaluate positively the system for the provision of rehabilitation and (or) habilitation services in the total number of interviewed PwD (their legal representatives), points | The satisfaction of PwD (their legal representatives) with rehabilitation or habilitation measures (services), points |
|-----------------------------------|---------------------------------------------------------------------------------------------------------------------------------------------------------|--------------------------------------------------------------------------------------------------------------------------------------------------|-----------------------------------------------------------------------------------------------------------------------------------------------------------------------------------------------------------------------------|-----------------------------------------------------------------------------------------------------------------------------------------------------------------------------------------------------------------------------|----------------------------------------------------------------------------------------------------------------------------------------------------------------------------------------------------------------------------------|------------------------------------------------------------------------------------------------------------------------------------------------------------------|---------------------------------------------------------------------------------------------------------------------------------------------------|------------------------------------------------------------------------------------------------------------------------------------------------------------------------------------------------------------------------------|------------------------------------------------------------------------------------------------------------------------------------------------------------------------------------------------------------------------------|-----------------------------------------------------------------------------------------------------------------------------------------------------------------------------------------------------------------------------------|-----------------------------------------------------------------------------------------------------------------------|
| Region 71                         | 234                                                                                                                                                     | 229                                                                                                                                              | 98,8                                                                                                                                                                                                                        | 97,9                                                                                                                                                                                                                        | 0,9                                                                                                                                                                                                                              | 234                                                                                                                                                              | 167                                                                                                                                               | 71,4                                                                                                                                                                                                                         | 71,4                                                                                                                                                                                                                         | 0,7                                                                                                                                                                                                                               | 1,6                                                                                                                   |
| Region 72                         |                                                                                                                                                         |                                                                                                                                                  | 0,8                                                                                                                                                                                                                         | 0,8                                                                                                                                                                                                                         | 0                                                                                                                                                                                                                                |                                                                                                                                                                  |                                                                                                                                                   | 0,9                                                                                                                                                                                                                          | 0,9                                                                                                                                                                                                                          | 0                                                                                                                                                                                                                                 | 0                                                                                                                     |
| Region 73                         |                                                                                                                                                         |                                                                                                                                                  |                                                                                                                                                                                                                             | 0,0                                                                                                                                                                                                                         | 0                                                                                                                                                                                                                                |                                                                                                                                                                  |                                                                                                                                                   |                                                                                                                                                                                                                              | 0,0                                                                                                                                                                                                                          | 0                                                                                                                                                                                                                                 | 0                                                                                                                     |
| Region 74                         |                                                                                                                                                         |                                                                                                                                                  | 1                                                                                                                                                                                                                           | 1,0                                                                                                                                                                                                                         | 0                                                                                                                                                                                                                                |                                                                                                                                                                  |                                                                                                                                                   | 1                                                                                                                                                                                                                            | 1,0                                                                                                                                                                                                                          | 0                                                                                                                                                                                                                                 | 0                                                                                                                     |
| Region 75                         | 684                                                                                                                                                     | 509                                                                                                                                              | 74                                                                                                                                                                                                                          | 74,4                                                                                                                                                                                                                        | 0,7                                                                                                                                                                                                                              | 684                                                                                                                                                              | 438                                                                                                                                               | 64                                                                                                                                                                                                                           | 64,0                                                                                                                                                                                                                         | 0,6                                                                                                                                                                                                                               | 1,3                                                                                                                   |
| Region 76                         |                                                                                                                                                         |                                                                                                                                                  |                                                                                                                                                                                                                             | 0,0                                                                                                                                                                                                                         | 0                                                                                                                                                                                                                                |                                                                                                                                                                  |                                                                                                                                                   |                                                                                                                                                                                                                              | 0,0                                                                                                                                                                                                                          | 0                                                                                                                                                                                                                                 | 0                                                                                                                     |
| Region 77                         |                                                                                                                                                         |                                                                                                                                                  | 0,9                                                                                                                                                                                                                         | 0,9                                                                                                                                                                                                                         | 0                                                                                                                                                                                                                                |                                                                                                                                                                  |                                                                                                                                                   | 0,9                                                                                                                                                                                                                          | 0,9                                                                                                                                                                                                                          | 0                                                                                                                                                                                                                                 | 0                                                                                                                     |
| Region 78                         |                                                                                                                                                         |                                                                                                                                                  | 0,6                                                                                                                                                                                                                         | 0,6                                                                                                                                                                                                                         | 0                                                                                                                                                                                                                                |                                                                                                                                                                  |                                                                                                                                                   | 0,6                                                                                                                                                                                                                          | 0,6                                                                                                                                                                                                                          | 0                                                                                                                                                                                                                                 | 0                                                                                                                     |
| Region 79                         | 500                                                                                                                                                     | 455                                                                                                                                              | 0,9                                                                                                                                                                                                                         | 91,0                                                                                                                                                                                                                        | 0,9                                                                                                                                                                                                                              | 500                                                                                                                                                              | 455                                                                                                                                               | 0,9                                                                                                                                                                                                                          | 91,0                                                                                                                                                                                                                         | 0,9                                                                                                                                                                                                                               | 1,8                                                                                                                   |
| Region 80                         |                                                                                                                                                         |                                                                                                                                                  |                                                                                                                                                                                                                             | 0,0                                                                                                                                                                                                                         | 0                                                                                                                                                                                                                                |                                                                                                                                                                  |                                                                                                                                                   |                                                                                                                                                                                                                              | 0,0                                                                                                                                                                                                                          | 0                                                                                                                                                                                                                                 | 0                                                                                                                     |
| Region 81                         |                                                                                                                                                         | 9500                                                                                                                                             | 0,8                                                                                                                                                                                                                         | 0,0                                                                                                                                                                                                                         | 0                                                                                                                                                                                                                                |                                                                                                                                                                  | 4043                                                                                                                                              | 0,5                                                                                                                                                                                                                          | 0,0                                                                                                                                                                                                                          | 0                                                                                                                                                                                                                                 | 0                                                                                                                     |
| Region 82                         | 134                                                                                                                                                     | 115                                                                                                                                              | 0,8                                                                                                                                                                                                                         | 85,8                                                                                                                                                                                                                        | 0,8                                                                                                                                                                                                                              | 134                                                                                                                                                              | 115                                                                                                                                               | 0,8                                                                                                                                                                                                                          | 85,8                                                                                                                                                                                                                         | 0,8                                                                                                                                                                                                                               | 1,6                                                                                                                   |
| Region 83                         | 120                                                                                                                                                     |                                                                                                                                                  | 86,7                                                                                                                                                                                                                        | 0,0                                                                                                                                                                                                                         | 0                                                                                                                                                                                                                                | 120                                                                                                                                                              |                                                                                                                                                   | 63,3                                                                                                                                                                                                                         | 0,0                                                                                                                                                                                                                          | 0                                                                                                                                                                                                                                 | 0                                                                                                                     |
| Region 84                         |                                                                                                                                                         |                                                                                                                                                  | 96                                                                                                                                                                                                                          | 96,0                                                                                                                                                                                                                        | 0,9                                                                                                                                                                                                                              |                                                                                                                                                                  |                                                                                                                                                   | 85                                                                                                                                                                                                                           | 85,0                                                                                                                                                                                                                         | 0,8                                                                                                                                                                                                                               | 1,7                                                                                                                   |
| Region 85                         |                                                                                                                                                         |                                                                                                                                                  |                                                                                                                                                                                                                             |                                                                                                                                                                                                                             |                                                                                                                                                                                                                                  |                                                                                                                                                                  |                                                                                                                                                   |                                                                                                                                                                                                                              |                                                                                                                                                                                                                              |                                                                                                                                                                                                                                   |                                                                                                                       |

**Indicators of the regional rehabilitation systems development in Russia (2018)**

| Regions of the Russian Federation | Total number of professionals providing rehabilitation and (or) habilitation measures for PwD | Number of professionals providing rehabilitation and (or) habilitation measures for PwD, who have updated skills and (or) been trained under programs including application of techniques on rehabilitation and (or) habilitation for PwD | The share of professionals providing rehabilitation and (or) habilitation measures for PwD, who have updated skills and (or) been trained under programs including application of techniques on rehabilitation and (or) habilitation for PwD in the total number of those professionals, % | The share of professionals providing rehabilitation and (or) habilitation measures for PwD, who have updated skills and (or) been trained under programs including application of techniques on rehabilitation and (or) habilitation for PwD in the total number of those professionals, % | The share of professionals providing rehabilitation and (or) habilitation measures for PwD, who have updated skills and (or) been trained under programs including application of techniques on rehabilitation and (or) habilitation for PwD in the total number of those professionals, points | The total number of professionals in educational organizations, who teach professionals providing rehabilitation and (or) habilitation measures | Number of professionals in educational organizations, who have been trained under programs on rehabilitation and habilitation for PwD for the last 5 years and teach professionals providing rehabilitation and (or) habilitation measures | The share of professionals in educational organizations, who have been trained under programs on rehabilitation and for PwD for the last 5 years and teach professionals providing rehabilitation and (or) habilitation measures in the total numbers of those professionals, % | The share of professionals in educational organizations, who have been trained under programs on rehabilitation and for PwD for the last 5 years and teach professionals providing rehabilitation and (or) habilitation measures in the total numbers of those professionals, % | The share of professionals in educational organizations, who have been trained under programs on rehabilitation and habilitation for PwD for the last 5 years and teach professionals providing rehabilitation and (or) habilitation measures in the total numbers of those professionals, points | The staffing of organizations providing rehabilitation and (or) habilitation services with specialists of the appropriate profile based on the needs of PwD in rehabilitation and (or) habilitation services, points |
|-----------------------------------|-----------------------------------------------------------------------------------------------|-------------------------------------------------------------------------------------------------------------------------------------------------------------------------------------------------------------------------------------------|--------------------------------------------------------------------------------------------------------------------------------------------------------------------------------------------------------------------------------------------------------------------------------------------|--------------------------------------------------------------------------------------------------------------------------------------------------------------------------------------------------------------------------------------------------------------------------------------------|-------------------------------------------------------------------------------------------------------------------------------------------------------------------------------------------------------------------------------------------------------------------------------------------------|-------------------------------------------------------------------------------------------------------------------------------------------------|--------------------------------------------------------------------------------------------------------------------------------------------------------------------------------------------------------------------------------------------|---------------------------------------------------------------------------------------------------------------------------------------------------------------------------------------------------------------------------------------------------------------------------------|---------------------------------------------------------------------------------------------------------------------------------------------------------------------------------------------------------------------------------------------------------------------------------|---------------------------------------------------------------------------------------------------------------------------------------------------------------------------------------------------------------------------------------------------------------------------------------------------|----------------------------------------------------------------------------------------------------------------------------------------------------------------------------------------------------------------------|
| Region 1                          | 2570                                                                                          | 766                                                                                                                                                                                                                                       | 29,8                                                                                                                                                                                                                                                                                       | 29,8                                                                                                                                                                                                                                                                                       | 0,3                                                                                                                                                                                                                                                                                             | 5                                                                                                                                               | 5                                                                                                                                                                                                                                          | 1                                                                                                                                                                                                                                                                               | 100,0                                                                                                                                                                                                                                                                           | 1                                                                                                                                                                                                                                                                                                 | 1,3                                                                                                                                                                                                                  |
| Region 2                          |                                                                                               |                                                                                                                                                                                                                                           | 0,5                                                                                                                                                                                                                                                                                        | 0,5                                                                                                                                                                                                                                                                                        | 0                                                                                                                                                                                                                                                                                               |                                                                                                                                                 |                                                                                                                                                                                                                                            | 0,5                                                                                                                                                                                                                                                                             | 0,5                                                                                                                                                                                                                                                                             | 0                                                                                                                                                                                                                                                                                                 | 0                                                                                                                                                                                                                    |
| Region 3                          |                                                                                               |                                                                                                                                                                                                                                           | 10,5                                                                                                                                                                                                                                                                                       | 10,5                                                                                                                                                                                                                                                                                       | 0,2                                                                                                                                                                                                                                                                                             |                                                                                                                                                 |                                                                                                                                                                                                                                            | 3                                                                                                                                                                                                                                                                               | 3,0                                                                                                                                                                                                                                                                             | 0                                                                                                                                                                                                                                                                                                 | 0,2                                                                                                                                                                                                                  |
| Region 4                          | 6780                                                                                          |                                                                                                                                                                                                                                           | 83,8                                                                                                                                                                                                                                                                                       | 0,0                                                                                                                                                                                                                                                                                        | 0                                                                                                                                                                                                                                                                                               | 557                                                                                                                                             | 175                                                                                                                                                                                                                                        | 31,4                                                                                                                                                                                                                                                                            | 31,4                                                                                                                                                                                                                                                                            | 0,3                                                                                                                                                                                                                                                                                               | 0,3                                                                                                                                                                                                                  |
| Region 5                          |                                                                                               |                                                                                                                                                                                                                                           | 60,5                                                                                                                                                                                                                                                                                       | 60,5                                                                                                                                                                                                                                                                                       | 0,7                                                                                                                                                                                                                                                                                             |                                                                                                                                                 |                                                                                                                                                                                                                                            | 0                                                                                                                                                                                                                                                                               | 0,0                                                                                                                                                                                                                                                                             | 0                                                                                                                                                                                                                                                                                                 | 0,7                                                                                                                                                                                                                  |
| Region 6                          | 2347                                                                                          | 669                                                                                                                                                                                                                                       | 0,3                                                                                                                                                                                                                                                                                        | 28,5                                                                                                                                                                                                                                                                                       | 0,3                                                                                                                                                                                                                                                                                             | 55                                                                                                                                              | 52                                                                                                                                                                                                                                         | 1                                                                                                                                                                                                                                                                               | 94,5                                                                                                                                                                                                                                                                            | 1                                                                                                                                                                                                                                                                                                 | 1,3                                                                                                                                                                                                                  |
| Region 7                          | 2562                                                                                          | 307                                                                                                                                                                                                                                       | 12                                                                                                                                                                                                                                                                                         | 12,0                                                                                                                                                                                                                                                                                       | 0,2                                                                                                                                                                                                                                                                                             | 166                                                                                                                                             | 140                                                                                                                                                                                                                                        | 84,3                                                                                                                                                                                                                                                                            | 84,3                                                                                                                                                                                                                                                                            | 0,8                                                                                                                                                                                                                                                                                               | 1                                                                                                                                                                                                                    |
| Region 8                          | 530                                                                                           | 242                                                                                                                                                                                                                                       | 45,7                                                                                                                                                                                                                                                                                       | 45,7                                                                                                                                                                                                                                                                                       | 0,5                                                                                                                                                                                                                                                                                             | 0                                                                                                                                               | 0                                                                                                                                                                                                                                          | 0                                                                                                                                                                                                                                                                               | 0,0                                                                                                                                                                                                                                                                             | 0                                                                                                                                                                                                                                                                                                 | 0,5                                                                                                                                                                                                                  |
| Region 9                          | 6833                                                                                          | 6833                                                                                                                                                                                                                                      | 100%                                                                                                                                                                                                                                                                                       | 100,0                                                                                                                                                                                                                                                                                      | 1                                                                                                                                                                                                                                                                                               |                                                                                                                                                 |                                                                                                                                                                                                                                            |                                                                                                                                                                                                                                                                                 | 0,0                                                                                                                                                                                                                                                                             | 0                                                                                                                                                                                                                                                                                                 | 1                                                                                                                                                                                                                    |
| Region 10                         | 12000                                                                                         | 7300                                                                                                                                                                                                                                      | 0,6                                                                                                                                                                                                                                                                                        | 60,8                                                                                                                                                                                                                                                                                       | 0,7                                                                                                                                                                                                                                                                                             |                                                                                                                                                 |                                                                                                                                                                                                                                            |                                                                                                                                                                                                                                                                                 | 0,0                                                                                                                                                                                                                                                                             | 0                                                                                                                                                                                                                                                                                                 | 0,7                                                                                                                                                                                                                  |
| Region 11                         | 2907                                                                                          | 785                                                                                                                                                                                                                                       | 27                                                                                                                                                                                                                                                                                         | 27,0                                                                                                                                                                                                                                                                                       | 0,3                                                                                                                                                                                                                                                                                             | 2799                                                                                                                                            | 717                                                                                                                                                                                                                                        | 25,6                                                                                                                                                                                                                                                                            | 25,6                                                                                                                                                                                                                                                                            | 0,3                                                                                                                                                                                                                                                                                               | 0,6                                                                                                                                                                                                                  |
| Region 12                         | 494                                                                                           | 323                                                                                                                                                                                                                                       | 65,4                                                                                                                                                                                                                                                                                       | 65,4                                                                                                                                                                                                                                                                                       | 0,7                                                                                                                                                                                                                                                                                             | 27                                                                                                                                              | 27                                                                                                                                                                                                                                         | 100                                                                                                                                                                                                                                                                             | 100,0                                                                                                                                                                                                                                                                           | 1                                                                                                                                                                                                                                                                                                 | 1,7                                                                                                                                                                                                                  |

**Indicators of the regional rehabilitation systems development in Russia (2018)**

| Regions of the Russian Federation | Total number of professionals providing rehabilitation and (or) habilitation measures for PwD | Number of professionals providing rehabilitation and (or) habilitation measures for PwD, who have updated skills and (or) been trained under programs including application of techniques on rehabilitation and (or) habilitation for PwD | The share of professionals providing rehabilitation and (or) habilitation measures for PwD, who have updated skills and (or) been trained under programs including application of techniques on rehabilitation and (or) habilitation for PwD in the total number of those professionals, % | The share of professionals providing rehabilitation and (or) habilitation measures for PwD, who have updated skills and (or) been trained under programs including application of techniques on rehabilitation and (or) habilitation for PwD in the total number of those professionals, % | The share of professionals providing rehabilitation and (or) habilitation measures for PwD, who have updated skills and (or) been trained under programs including application of techniques on rehabilitation and (or) habilitation for PwD in the total number of those professionals, points | The total number of professionals in educational organizations, who teach professionals providing rehabilitation and (or) habilitation measures | Number of professionals in educational organizations, who have been trained under programs on rehabilitation and habilitation for PwD for the last 5 years and teach professionals providing rehabilitation and (or) habilitation measures | The share of professionals in educational organizations, who have been trained under programs on rehabilitation and for PwD for the last 5 years and teach professionals providing rehabilitation and (or) habilitation measures in the total numbers of those professionals, % | The share of professionals in educational organizations, who have been trained under programs on rehabilitation and for PwD for the last 5 years and teach professionals providing rehabilitation and (or) habilitation measures in the total numbers of those professionals, % | The share of professionals in educational organizations, who have been trained under programs on rehabilitation and habilitation for PwD for the last 5 years and teach professionals providing rehabilitation and (or) habilitation measures in the total numbers of those professionals, points | The staffing of organizations providing rehabilitation and (or) habilitation services with specialists of the appropriate profile based on the needs of PwD in rehabilitation and (or) habilitation services, points |
|-----------------------------------|-----------------------------------------------------------------------------------------------|-------------------------------------------------------------------------------------------------------------------------------------------------------------------------------------------------------------------------------------------|--------------------------------------------------------------------------------------------------------------------------------------------------------------------------------------------------------------------------------------------------------------------------------------------|--------------------------------------------------------------------------------------------------------------------------------------------------------------------------------------------------------------------------------------------------------------------------------------------|-------------------------------------------------------------------------------------------------------------------------------------------------------------------------------------------------------------------------------------------------------------------------------------------------|-------------------------------------------------------------------------------------------------------------------------------------------------|--------------------------------------------------------------------------------------------------------------------------------------------------------------------------------------------------------------------------------------------|---------------------------------------------------------------------------------------------------------------------------------------------------------------------------------------------------------------------------------------------------------------------------------|---------------------------------------------------------------------------------------------------------------------------------------------------------------------------------------------------------------------------------------------------------------------------------|---------------------------------------------------------------------------------------------------------------------------------------------------------------------------------------------------------------------------------------------------------------------------------------------------|----------------------------------------------------------------------------------------------------------------------------------------------------------------------------------------------------------------------|
| Region 13                         | 7682                                                                                          | 1057                                                                                                                                                                                                                                      | 0,2                                                                                                                                                                                                                                                                                        | 13,8                                                                                                                                                                                                                                                                                       | 0,2                                                                                                                                                                                                                                                                                             | 0                                                                                                                                               | 0                                                                                                                                                                                                                                          | 0                                                                                                                                                                                                                                                                               | 0,0                                                                                                                                                                                                                                                                             | 0                                                                                                                                                                                                                                                                                                 | 0,2                                                                                                                                                                                                                  |
| Region 14                         | 3032                                                                                          | 1836                                                                                                                                                                                                                                      | 60,55                                                                                                                                                                                                                                                                                      | 60,6                                                                                                                                                                                                                                                                                       | 0,7                                                                                                                                                                                                                                                                                             | 87                                                                                                                                              | 82                                                                                                                                                                                                                                         | 94,25                                                                                                                                                                                                                                                                           | 94,3                                                                                                                                                                                                                                                                            | 1                                                                                                                                                                                                                                                                                                 | 1,7                                                                                                                                                                                                                  |
| Region 15                         | 1904                                                                                          | 1580                                                                                                                                                                                                                                      | 82,98                                                                                                                                                                                                                                                                                      | 83,0                                                                                                                                                                                                                                                                                       | 0,8                                                                                                                                                                                                                                                                                             | 18                                                                                                                                              | 6                                                                                                                                                                                                                                          | 33,3                                                                                                                                                                                                                                                                            | 33,3                                                                                                                                                                                                                                                                            | 0,3                                                                                                                                                                                                                                                                                               | 1,1                                                                                                                                                                                                                  |
| Region 16                         |                                                                                               |                                                                                                                                                                                                                                           | 0,8                                                                                                                                                                                                                                                                                        | 0,8                                                                                                                                                                                                                                                                                        | 0                                                                                                                                                                                                                                                                                               |                                                                                                                                                 |                                                                                                                                                                                                                                            | 0,7                                                                                                                                                                                                                                                                             | 0,7                                                                                                                                                                                                                                                                             | 0                                                                                                                                                                                                                                                                                                 | 0                                                                                                                                                                                                                    |
| Region 17                         | 686                                                                                           | 546                                                                                                                                                                                                                                       | 79,59                                                                                                                                                                                                                                                                                      | 79,6                                                                                                                                                                                                                                                                                       | 0,8                                                                                                                                                                                                                                                                                             | 4341                                                                                                                                            | 3910                                                                                                                                                                                                                                       | 9000%                                                                                                                                                                                                                                                                           | 90,1                                                                                                                                                                                                                                                                            | 1                                                                                                                                                                                                                                                                                                 | 1,8                                                                                                                                                                                                                  |
| Region 18                         | 7019                                                                                          | 1708                                                                                                                                                                                                                                      | 24,3                                                                                                                                                                                                                                                                                       | 24,3                                                                                                                                                                                                                                                                                       | 0,3                                                                                                                                                                                                                                                                                             | 7                                                                                                                                               | 2                                                                                                                                                                                                                                          | 0,29                                                                                                                                                                                                                                                                            | 28,6                                                                                                                                                                                                                                                                            | 0,3                                                                                                                                                                                                                                                                                               | 0,6                                                                                                                                                                                                                  |
| Region 19                         | 353                                                                                           | 103                                                                                                                                                                                                                                       | 29                                                                                                                                                                                                                                                                                         | 29,2                                                                                                                                                                                                                                                                                       | 0,3                                                                                                                                                                                                                                                                                             | 4875                                                                                                                                            | 400                                                                                                                                                                                                                                        | 8                                                                                                                                                                                                                                                                               | 8,2                                                                                                                                                                                                                                                                             | 0,1                                                                                                                                                                                                                                                                                               | 0,4                                                                                                                                                                                                                  |
| Region 20                         | 10904                                                                                         | 3420                                                                                                                                                                                                                                      | 31,4                                                                                                                                                                                                                                                                                       | 31,4                                                                                                                                                                                                                                                                                       | 0,3                                                                                                                                                                                                                                                                                             | 15                                                                                                                                              | 15                                                                                                                                                                                                                                         | 100                                                                                                                                                                                                                                                                             | 100,0                                                                                                                                                                                                                                                                           | 1                                                                                                                                                                                                                                                                                                 | 1,3                                                                                                                                                                                                                  |
| Region 21                         | 1321                                                                                          | 502                                                                                                                                                                                                                                       | 38                                                                                                                                                                                                                                                                                         | 38,0                                                                                                                                                                                                                                                                                       | 0,3                                                                                                                                                                                                                                                                                             | 1004                                                                                                                                            | 682                                                                                                                                                                                                                                        | 67,9                                                                                                                                                                                                                                                                            | 67,9                                                                                                                                                                                                                                                                            | 0,7                                                                                                                                                                                                                                                                                               | 1                                                                                                                                                                                                                    |
| Region 22                         |                                                                                               |                                                                                                                                                                                                                                           | 1                                                                                                                                                                                                                                                                                          | 1,0                                                                                                                                                                                                                                                                                        | 0                                                                                                                                                                                                                                                                                               |                                                                                                                                                 |                                                                                                                                                                                                                                            | 1                                                                                                                                                                                                                                                                               | 1,0                                                                                                                                                                                                                                                                             | 0                                                                                                                                                                                                                                                                                                 | 0                                                                                                                                                                                                                    |
| Region 23                         | 174                                                                                           | 55                                                                                                                                                                                                                                        | 31,6                                                                                                                                                                                                                                                                                       | 31,6                                                                                                                                                                                                                                                                                       | 0,3                                                                                                                                                                                                                                                                                             | 1285                                                                                                                                            | 1089                                                                                                                                                                                                                                       | 84,7                                                                                                                                                                                                                                                                            | 84,7                                                                                                                                                                                                                                                                            | 0,8                                                                                                                                                                                                                                                                                               | 1,1                                                                                                                                                                                                                  |
| Region 24                         | 0                                                                                             | 0                                                                                                                                                                                                                                         | 0                                                                                                                                                                                                                                                                                          | 0,0                                                                                                                                                                                                                                                                                        | 0                                                                                                                                                                                                                                                                                               | 0                                                                                                                                               | 0                                                                                                                                                                                                                                          | 0                                                                                                                                                                                                                                                                               | 0,0                                                                                                                                                                                                                                                                             | 0                                                                                                                                                                                                                                                                                                 | 0                                                                                                                                                                                                                    |

**Indicators of the regional rehabilitation systems development in Russia (2018)**

| Regions of the Russian Federation | Total number of professionals providing rehabilitation and (or) habilitation measures for PwD | Number of professionals providing rehabilitation and (or) habilitation measures for PwD, who have updated skills and (or) been trained under programs including application of techniques on rehabilitation and (or) habilitation for PwD | The share of professionals providing rehabilitation and (or) habilitation measures for PwD, who have updated skills and (or) been trained under programs including application of techniques on rehabilitation and (or) habilitation for PwD in the total number of those professionals, % | The share of professionals providing rehabilitation and (or) habilitation measures for PwD, who have updated skills and (or) been trained under programs including application of techniques on rehabilitation and (or) habilitation for PwD in the total number of those professionals, % | The share of professionals providing rehabilitation and (or) habilitation measures for PwD, who have updated skills and (or) been trained under programs including application of techniques on rehabilitation and (or) habilitation for PwD in the total number of those professionals, points | The total number of professionals in educational organizations, who teach professionals providing rehabilitation and (or) habilitation measures | Number of professionals in educational organizations, who have been trained under programs on rehabilitation and habilitation for PwD for the last 5 years and teach professionals providing rehabilitation and (or) habilitation measures | The share of professionals in educational organizations, who have been trained under programs on rehabilitation and for PwD for the last 5 years and teach professionals providing rehabilitation and (or) habilitation measures in the total numbers of those professionals, % | The share of professionals in educational organizations, who have been trained under programs on rehabilitation and for PwD for the last 5 years and teach professionals providing rehabilitation and (or) habilitation measures in the total numbers of those professionals, % | The share of professionals in educational organizations, who have been trained under programs on rehabilitation and habilitation for PwD for the last 5 years and teach professionals providing rehabilitation and (or) habilitation measures in the total numbers of those professionals, points | The staffing of organizations providing rehabilitation and (or) habilitation services with specialists of the appropriate profile based on the needs of PwD in rehabilitation and (or) habilitation services, points |
|-----------------------------------|-----------------------------------------------------------------------------------------------|-------------------------------------------------------------------------------------------------------------------------------------------------------------------------------------------------------------------------------------------|--------------------------------------------------------------------------------------------------------------------------------------------------------------------------------------------------------------------------------------------------------------------------------------------|--------------------------------------------------------------------------------------------------------------------------------------------------------------------------------------------------------------------------------------------------------------------------------------------|-------------------------------------------------------------------------------------------------------------------------------------------------------------------------------------------------------------------------------------------------------------------------------------------------|-------------------------------------------------------------------------------------------------------------------------------------------------|--------------------------------------------------------------------------------------------------------------------------------------------------------------------------------------------------------------------------------------------|---------------------------------------------------------------------------------------------------------------------------------------------------------------------------------------------------------------------------------------------------------------------------------|---------------------------------------------------------------------------------------------------------------------------------------------------------------------------------------------------------------------------------------------------------------------------------|---------------------------------------------------------------------------------------------------------------------------------------------------------------------------------------------------------------------------------------------------------------------------------------------------|----------------------------------------------------------------------------------------------------------------------------------------------------------------------------------------------------------------------|
| Region 25                         | 13639                                                                                         | 2462                                                                                                                                                                                                                                      | 18                                                                                                                                                                                                                                                                                         | 18,1                                                                                                                                                                                                                                                                                       | 0,2                                                                                                                                                                                                                                                                                             | 6104                                                                                                                                            | 3961                                                                                                                                                                                                                                       | 65                                                                                                                                                                                                                                                                              | 64,9                                                                                                                                                                                                                                                                            | 0,7                                                                                                                                                                                                                                                                                               | 0,9                                                                                                                                                                                                                  |
| Region 26                         | 306                                                                                           | 242                                                                                                                                                                                                                                       | 79,9                                                                                                                                                                                                                                                                                       | 79,1                                                                                                                                                                                                                                                                                       | 0,8                                                                                                                                                                                                                                                                                             | 4829                                                                                                                                            | 4829                                                                                                                                                                                                                                       | 100                                                                                                                                                                                                                                                                             | 100,0                                                                                                                                                                                                                                                                           | 1                                                                                                                                                                                                                                                                                                 | 1,8                                                                                                                                                                                                                  |
| Region 27                         |                                                                                               |                                                                                                                                                                                                                                           | 0,6                                                                                                                                                                                                                                                                                        | 0,6                                                                                                                                                                                                                                                                                        | 0                                                                                                                                                                                                                                                                                               |                                                                                                                                                 |                                                                                                                                                                                                                                            | 0,9                                                                                                                                                                                                                                                                             | 0,9                                                                                                                                                                                                                                                                             | 0                                                                                                                                                                                                                                                                                                 | 0                                                                                                                                                                                                                    |
| Region 28                         | 5950                                                                                          | 2485                                                                                                                                                                                                                                      | 41,77                                                                                                                                                                                                                                                                                      | 41,8                                                                                                                                                                                                                                                                                       | 0,5                                                                                                                                                                                                                                                                                             | 3859                                                                                                                                            | 3473                                                                                                                                                                                                                                       | 90                                                                                                                                                                                                                                                                              | 90,0                                                                                                                                                                                                                                                                            | 0                                                                                                                                                                                                                                                                                                 | 0,5                                                                                                                                                                                                                  |
| Region 29                         |                                                                                               |                                                                                                                                                                                                                                           | 42,5                                                                                                                                                                                                                                                                                       | 42,5                                                                                                                                                                                                                                                                                       | 0,5                                                                                                                                                                                                                                                                                             |                                                                                                                                                 |                                                                                                                                                                                                                                            | 40                                                                                                                                                                                                                                                                              | 40,0                                                                                                                                                                                                                                                                            | 0,5                                                                                                                                                                                                                                                                                               | 1                                                                                                                                                                                                                    |
| Region 30                         | 7593                                                                                          | 2809                                                                                                                                                                                                                                      | 37                                                                                                                                                                                                                                                                                         | 37,0                                                                                                                                                                                                                                                                                       | 0,3                                                                                                                                                                                                                                                                                             | 6986                                                                                                                                            | 3108                                                                                                                                                                                                                                       | 44,5                                                                                                                                                                                                                                                                            | 44,5                                                                                                                                                                                                                                                                            | 0,5                                                                                                                                                                                                                                                                                               | 0,8                                                                                                                                                                                                                  |
| Region 31                         | 174                                                                                           | 122                                                                                                                                                                                                                                       | 70,1                                                                                                                                                                                                                                                                                       | 70,1                                                                                                                                                                                                                                                                                       | 0,8                                                                                                                                                                                                                                                                                             | 1                                                                                                                                               | 1                                                                                                                                                                                                                                          | 100                                                                                                                                                                                                                                                                             | 100,0                                                                                                                                                                                                                                                                           | 1                                                                                                                                                                                                                                                                                                 | 1,8                                                                                                                                                                                                                  |
| Region 32                         |                                                                                               |                                                                                                                                                                                                                                           |                                                                                                                                                                                                                                                                                            | 0,0                                                                                                                                                                                                                                                                                        | 0                                                                                                                                                                                                                                                                                               |                                                                                                                                                 |                                                                                                                                                                                                                                            |                                                                                                                                                                                                                                                                                 | 0,0                                                                                                                                                                                                                                                                             | 0                                                                                                                                                                                                                                                                                                 | 0                                                                                                                                                                                                                    |
| Region 33                         | 921                                                                                           | 591                                                                                                                                                                                                                                       | 0,7                                                                                                                                                                                                                                                                                        | 64,2                                                                                                                                                                                                                                                                                       | 0,7                                                                                                                                                                                                                                                                                             | 27                                                                                                                                              | 27                                                                                                                                                                                                                                         | 1                                                                                                                                                                                                                                                                               | 100,0                                                                                                                                                                                                                                                                           | 1                                                                                                                                                                                                                                                                                                 | 1,7                                                                                                                                                                                                                  |
| Region 34                         | 4698                                                                                          | 4676                                                                                                                                                                                                                                      | 99                                                                                                                                                                                                                                                                                         | 99,5                                                                                                                                                                                                                                                                                       | 1                                                                                                                                                                                                                                                                                               | 4606                                                                                                                                            | 4606                                                                                                                                                                                                                                       | 100                                                                                                                                                                                                                                                                             | 100,0                                                                                                                                                                                                                                                                           | 1                                                                                                                                                                                                                                                                                                 | 2                                                                                                                                                                                                                    |
| Region 35                         | 4988                                                                                          | 178                                                                                                                                                                                                                                       | 3,57                                                                                                                                                                                                                                                                                       | 3,6                                                                                                                                                                                                                                                                                        | 0                                                                                                                                                                                                                                                                                               | 168                                                                                                                                             | 130                                                                                                                                                                                                                                        | 77,4                                                                                                                                                                                                                                                                            | 77,4                                                                                                                                                                                                                                                                            | 0,8                                                                                                                                                                                                                                                                                               | 0,8                                                                                                                                                                                                                  |
| Region 36                         | 2940                                                                                          | 667                                                                                                                                                                                                                                       | 23                                                                                                                                                                                                                                                                                         | 22,7                                                                                                                                                                                                                                                                                       | 0,3                                                                                                                                                                                                                                                                                             | 22                                                                                                                                              | 5                                                                                                                                                                                                                                          | 23                                                                                                                                                                                                                                                                              | 22,7                                                                                                                                                                                                                                                                            | 0,3                                                                                                                                                                                                                                                                                               | 0,6                                                                                                                                                                                                                  |

**Indicators of the regional rehabilitation systems development in Russia (2018)**

| Regions of the Russian Federation | Total number of professionals providing rehabilitation and (or) habilitation measures for PwD | Number of professionals providing rehabilitation and (or) habilitation measures for PwD, who have updated skills and (or) been trained under programs including application of techniques on rehabilitation and (or) habilitation for PwD | The share of professionals providing rehabilitation and (or) habilitation measures for PwD, who have updated skills and (or) been trained under programs including application of techniques on rehabilitation and (or) habilitation for PwD in the total number of those professionals, % | The share of professionals providing rehabilitation and (or) habilitation measures for PwD, who have updated skills and (or) been trained under programs including application of techniques on rehabilitation and (or) habilitation for PwD in the total number of those professionals, % | The share of professionals providing rehabilitation and (or) habilitation measures for PwD, who have updated skills and (or) been trained under programs including application of techniques on rehabilitation and (or) habilitation for PwD in the total number of those professionals, points | The total number of professionals in educational organizations, who teach professionals providing rehabilitation and (or) habilitation measures | Number of professionals in educational organizations, who have been trained under programs on rehabilitation and habilitation for PwD for the last 5 years and teach professionals providing rehabilitation and (or) habilitation measures | The share of professionals in educational organizations, who have been trained under programs on rehabilitation and for PwD for the last 5 years and teach professionals providing rehabilitation and (or) habilitation measures in the total numbers of those professionals, % | The share of professionals in educational organizations, who have been trained under programs on rehabilitation and for PwD for the last 5 years and teach professionals providing rehabilitation and (or) habilitation measures in the total numbers of those professionals, % | The share of professionals in educational organizations, who have been trained under programs on rehabilitation and habilitation for PwD for the last 5 years and teach professionals providing rehabilitation and (or) habilitation measures in the total numbers of those professionals, points | The staffing of organizations providing rehabilitation and (or) habilitation services with specialists of the appropriate profile based on the needs of PwD in rehabilitation and (or) habilitation services, points |
|-----------------------------------|-----------------------------------------------------------------------------------------------|-------------------------------------------------------------------------------------------------------------------------------------------------------------------------------------------------------------------------------------------|--------------------------------------------------------------------------------------------------------------------------------------------------------------------------------------------------------------------------------------------------------------------------------------------|--------------------------------------------------------------------------------------------------------------------------------------------------------------------------------------------------------------------------------------------------------------------------------------------|-------------------------------------------------------------------------------------------------------------------------------------------------------------------------------------------------------------------------------------------------------------------------------------------------|-------------------------------------------------------------------------------------------------------------------------------------------------|--------------------------------------------------------------------------------------------------------------------------------------------------------------------------------------------------------------------------------------------|---------------------------------------------------------------------------------------------------------------------------------------------------------------------------------------------------------------------------------------------------------------------------------|---------------------------------------------------------------------------------------------------------------------------------------------------------------------------------------------------------------------------------------------------------------------------------|---------------------------------------------------------------------------------------------------------------------------------------------------------------------------------------------------------------------------------------------------------------------------------------------------|----------------------------------------------------------------------------------------------------------------------------------------------------------------------------------------------------------------------|
| Region 37                         | 4314                                                                                          | 1413                                                                                                                                                                                                                                      | 32,8                                                                                                                                                                                                                                                                                       | 32,8                                                                                                                                                                                                                                                                                       | 0,3                                                                                                                                                                                                                                                                                             | 40                                                                                                                                              | 28                                                                                                                                                                                                                                         | 70                                                                                                                                                                                                                                                                              | 70,0                                                                                                                                                                                                                                                                            | 0,8                                                                                                                                                                                                                                                                                               | 1,1                                                                                                                                                                                                                  |
| Region 38                         | 261                                                                                           | 219                                                                                                                                                                                                                                       | 0,8                                                                                                                                                                                                                                                                                        | 83,9                                                                                                                                                                                                                                                                                       | 0,8                                                                                                                                                                                                                                                                                             | 1601                                                                                                                                            | 600                                                                                                                                                                                                                                        | 0,3                                                                                                                                                                                                                                                                             | 37,5                                                                                                                                                                                                                                                                            | 0,3                                                                                                                                                                                                                                                                                               | 1,1                                                                                                                                                                                                                  |
| Region 39                         | 9157                                                                                          | 341                                                                                                                                                                                                                                       | 3,7                                                                                                                                                                                                                                                                                        | 3,7                                                                                                                                                                                                                                                                                        | 0                                                                                                                                                                                                                                                                                               | 77                                                                                                                                              | 37                                                                                                                                                                                                                                         | 48,1                                                                                                                                                                                                                                                                            | 48,1                                                                                                                                                                                                                                                                            | 0,5                                                                                                                                                                                                                                                                                               | 0,5                                                                                                                                                                                                                  |
| Region 40                         | 679                                                                                           | 435                                                                                                                                                                                                                                       | 64,1                                                                                                                                                                                                                                                                                       | 64,1                                                                                                                                                                                                                                                                                       | 0,7                                                                                                                                                                                                                                                                                             | 2493                                                                                                                                            | 300                                                                                                                                                                                                                                        | 12,03                                                                                                                                                                                                                                                                           | 12,0                                                                                                                                                                                                                                                                            | 0,2                                                                                                                                                                                                                                                                                               | 0,9                                                                                                                                                                                                                  |
| Region 41                         | 1249                                                                                          | 375                                                                                                                                                                                                                                       | 30                                                                                                                                                                                                                                                                                         | 30,0                                                                                                                                                                                                                                                                                       | 0,3                                                                                                                                                                                                                                                                                             | 1726                                                                                                                                            | 1726                                                                                                                                                                                                                                       | 100                                                                                                                                                                                                                                                                             | 100,0                                                                                                                                                                                                                                                                           | 1                                                                                                                                                                                                                                                                                                 | 1,3                                                                                                                                                                                                                  |
| Region 42                         |                                                                                               |                                                                                                                                                                                                                                           |                                                                                                                                                                                                                                                                                            | 0,0                                                                                                                                                                                                                                                                                        | 0                                                                                                                                                                                                                                                                                               |                                                                                                                                                 |                                                                                                                                                                                                                                            |                                                                                                                                                                                                                                                                                 | 0,0                                                                                                                                                                                                                                                                             | 0                                                                                                                                                                                                                                                                                                 | 0                                                                                                                                                                                                                    |
| Region 43                         | 1431                                                                                          | 1072                                                                                                                                                                                                                                      | 75                                                                                                                                                                                                                                                                                         | 74,9                                                                                                                                                                                                                                                                                       | 0,8                                                                                                                                                                                                                                                                                             | 0                                                                                                                                               | 0                                                                                                                                                                                                                                          | 0                                                                                                                                                                                                                                                                               | 0,0                                                                                                                                                                                                                                                                             | 0                                                                                                                                                                                                                                                                                                 | 0,8                                                                                                                                                                                                                  |
| Region 44                         | 1362                                                                                          | 340                                                                                                                                                                                                                                       | 0,2496                                                                                                                                                                                                                                                                                     | 25,0                                                                                                                                                                                                                                                                                       | 0,3                                                                                                                                                                                                                                                                                             | 61                                                                                                                                              | 61                                                                                                                                                                                                                                         | 1                                                                                                                                                                                                                                                                               | 100,0                                                                                                                                                                                                                                                                           | 1                                                                                                                                                                                                                                                                                                 | 1,3                                                                                                                                                                                                                  |
| Region 45                         | 174                                                                                           | 130                                                                                                                                                                                                                                       | 74,7                                                                                                                                                                                                                                                                                       | 74,7                                                                                                                                                                                                                                                                                       | 0,8                                                                                                                                                                                                                                                                                             | 4914                                                                                                                                            | 1990                                                                                                                                                                                                                                       | 40,5                                                                                                                                                                                                                                                                            | 40,5                                                                                                                                                                                                                                                                            | 0,5                                                                                                                                                                                                                                                                                               | 1,3                                                                                                                                                                                                                  |
| Region 46                         |                                                                                               |                                                                                                                                                                                                                                           | 51,3                                                                                                                                                                                                                                                                                       | 51,3                                                                                                                                                                                                                                                                                       | 0,5                                                                                                                                                                                                                                                                                             |                                                                                                                                                 |                                                                                                                                                                                                                                            | 93,5                                                                                                                                                                                                                                                                            | 93,5                                                                                                                                                                                                                                                                            | 1                                                                                                                                                                                                                                                                                                 | 1,5                                                                                                                                                                                                                  |
| Region 47                         | 566                                                                                           | 471                                                                                                                                                                                                                                       | 0,8                                                                                                                                                                                                                                                                                        | 83,2                                                                                                                                                                                                                                                                                       | 0,8                                                                                                                                                                                                                                                                                             | 66                                                                                                                                              | 66                                                                                                                                                                                                                                         | 1                                                                                                                                                                                                                                                                               | 100,0                                                                                                                                                                                                                                                                           | 1                                                                                                                                                                                                                                                                                                 | 1,8                                                                                                                                                                                                                  |
| Region 48                         | 5395                                                                                          | 3186                                                                                                                                                                                                                                      | 59                                                                                                                                                                                                                                                                                         | 59,1                                                                                                                                                                                                                                                                                       | 0,5                                                                                                                                                                                                                                                                                             | 1525                                                                                                                                            | 1103                                                                                                                                                                                                                                       | 72,3                                                                                                                                                                                                                                                                            | 72,3                                                                                                                                                                                                                                                                            | 0,8                                                                                                                                                                                                                                                                                               | 1,3                                                                                                                                                                                                                  |
| Region 49                         | 823                                                                                           | 749                                                                                                                                                                                                                                       | 91                                                                                                                                                                                                                                                                                         | 91,0                                                                                                                                                                                                                                                                                       | 1                                                                                                                                                                                                                                                                                               | 3                                                                                                                                               | 3                                                                                                                                                                                                                                          | 100                                                                                                                                                                                                                                                                             | 100,0                                                                                                                                                                                                                                                                           | 1                                                                                                                                                                                                                                                                                                 | 2                                                                                                                                                                                                                    |

**Indicators of the regional rehabilitation systems development in Russia (2018)**

| Regions of the Russian Federation | Total number of professionals providing rehabilitation and (or) habilitation measures for PwD | Number of professionals providing rehabilitation and (or) habilitation measures for PwD, who have updated skills and (or) been trained under programs including application of techniques on rehabilitation and (or) habilitation for PwD | The share of professionals providing rehabilitation and (or) habilitation measures for PwD, who have updated skills and (or) been trained under programs including application of techniques on rehabilitation and (or) habilitation for PwD in the total number of those professionals, % | The share of professionals providing rehabilitation and (or) habilitation measures for PwD, who have updated skills and (or) been trained under programs including application of techniques on rehabilitation and (or) habilitation for PwD in the total number of those professionals, % | The share of professionals providing rehabilitation and (or) habilitation measures for PwD, who have updated skills and (or) been trained under programs including application of techniques on rehabilitation and (or) habilitation for PwD in the total number of those professionals, points | The total number of professionals in educational organizations, who teach professionals providing rehabilitation and (or) habilitation measures | Number of professionals in educational organizations, who have been trained under programs on rehabilitation and habilitation for PwD for the last 5 years and teach professionals providing rehabilitation and (or) habilitation measures | The share of professionals in educational organizations, who have been trained under programs on rehabilitation and for PwD for the last 5 years and teach professionals providing rehabilitation and (or) habilitation measures in the total numbers of those professionals, % | The share of professionals in educational organizations, who have been trained under programs on rehabilitation and for PwD for the last 5 years and teach professionals providing rehabilitation and (or) habilitation measures in the total numbers of those professionals, % | The share of professionals in educational organizations, who have been trained under programs on rehabilitation and habilitation for PwD for the last 5 years and teach professionals providing rehabilitation and (or) habilitation measures in the total numbers of those professionals, points | The staffing of organizations providing rehabilitation and (or) habilitation services with specialists of the appropriate profile based on the needs of PwD in rehabilitation and (or) habilitation services, points |
|-----------------------------------|-----------------------------------------------------------------------------------------------|-------------------------------------------------------------------------------------------------------------------------------------------------------------------------------------------------------------------------------------------|--------------------------------------------------------------------------------------------------------------------------------------------------------------------------------------------------------------------------------------------------------------------------------------------|--------------------------------------------------------------------------------------------------------------------------------------------------------------------------------------------------------------------------------------------------------------------------------------------|-------------------------------------------------------------------------------------------------------------------------------------------------------------------------------------------------------------------------------------------------------------------------------------------------|-------------------------------------------------------------------------------------------------------------------------------------------------|--------------------------------------------------------------------------------------------------------------------------------------------------------------------------------------------------------------------------------------------|---------------------------------------------------------------------------------------------------------------------------------------------------------------------------------------------------------------------------------------------------------------------------------|---------------------------------------------------------------------------------------------------------------------------------------------------------------------------------------------------------------------------------------------------------------------------------|---------------------------------------------------------------------------------------------------------------------------------------------------------------------------------------------------------------------------------------------------------------------------------------------------|----------------------------------------------------------------------------------------------------------------------------------------------------------------------------------------------------------------------|
| Region 50                         |                                                                                               |                                                                                                                                                                                                                                           | 98                                                                                                                                                                                                                                                                                         | 98,0                                                                                                                                                                                                                                                                                       | 1                                                                                                                                                                                                                                                                                               |                                                                                                                                                 |                                                                                                                                                                                                                                            | 31                                                                                                                                                                                                                                                                              | 31,0                                                                                                                                                                                                                                                                            | 0,3                                                                                                                                                                                                                                                                                               | 1,3                                                                                                                                                                                                                  |
| Region 51                         | 7812                                                                                          | 5688                                                                                                                                                                                                                                      | 73                                                                                                                                                                                                                                                                                         | 72,8                                                                                                                                                                                                                                                                                       | 0,8                                                                                                                                                                                                                                                                                             | 49                                                                                                                                              | 49                                                                                                                                                                                                                                         | 100                                                                                                                                                                                                                                                                             | 100,0                                                                                                                                                                                                                                                                           | 1                                                                                                                                                                                                                                                                                                 | 1,8                                                                                                                                                                                                                  |
| Region 52                         | 5942                                                                                          | 5928                                                                                                                                                                                                                                      | 99,7                                                                                                                                                                                                                                                                                       | 99,8                                                                                                                                                                                                                                                                                       | 1                                                                                                                                                                                                                                                                                               | 7                                                                                                                                               | 7                                                                                                                                                                                                                                          | 100                                                                                                                                                                                                                                                                             | 100,0                                                                                                                                                                                                                                                                           | 1                                                                                                                                                                                                                                                                                                 | 2                                                                                                                                                                                                                    |
| Region 53                         | 265                                                                                           | 59                                                                                                                                                                                                                                        | 22,3                                                                                                                                                                                                                                                                                       | 22,3                                                                                                                                                                                                                                                                                       | 0,3                                                                                                                                                                                                                                                                                             | 65                                                                                                                                              | 22                                                                                                                                                                                                                                         | 33                                                                                                                                                                                                                                                                              | 33,8                                                                                                                                                                                                                                                                            | 0,3                                                                                                                                                                                                                                                                                               | 0,6                                                                                                                                                                                                                  |
| Region 54                         |                                                                                               |                                                                                                                                                                                                                                           | 91                                                                                                                                                                                                                                                                                         | 91,0                                                                                                                                                                                                                                                                                       | 1                                                                                                                                                                                                                                                                                               |                                                                                                                                                 |                                                                                                                                                                                                                                            | 12,5                                                                                                                                                                                                                                                                            | 12,5                                                                                                                                                                                                                                                                            | 0,2                                                                                                                                                                                                                                                                                               | 1,2                                                                                                                                                                                                                  |
| Region 55                         |                                                                                               |                                                                                                                                                                                                                                           | 5480,00%                                                                                                                                                                                                                                                                                   | 54,8                                                                                                                                                                                                                                                                                       | 0,5                                                                                                                                                                                                                                                                                             |                                                                                                                                                 |                                                                                                                                                                                                                                            | 9800%                                                                                                                                                                                                                                                                           | 98,0                                                                                                                                                                                                                                                                            | 1                                                                                                                                                                                                                                                                                                 | 1,5                                                                                                                                                                                                                  |
| Region 56                         |                                                                                               |                                                                                                                                                                                                                                           | 95,4                                                                                                                                                                                                                                                                                       | 95,4                                                                                                                                                                                                                                                                                       | 1                                                                                                                                                                                                                                                                                               |                                                                                                                                                 |                                                                                                                                                                                                                                            | 87,5                                                                                                                                                                                                                                                                            | 87,5                                                                                                                                                                                                                                                                            | 0,8                                                                                                                                                                                                                                                                                               | 1,8                                                                                                                                                                                                                  |
| Region 57                         | 1206                                                                                          | 911                                                                                                                                                                                                                                       | 0,755                                                                                                                                                                                                                                                                                      | 75,5                                                                                                                                                                                                                                                                                       | 0,8                                                                                                                                                                                                                                                                                             | 617                                                                                                                                             | 617                                                                                                                                                                                                                                        | 1                                                                                                                                                                                                                                                                               | 100,0                                                                                                                                                                                                                                                                           | 1                                                                                                                                                                                                                                                                                                 | 1,8                                                                                                                                                                                                                  |
| Region 58                         | 15798                                                                                         | 10887                                                                                                                                                                                                                                     | 68,9                                                                                                                                                                                                                                                                                       | 68,9                                                                                                                                                                                                                                                                                       | 0,7                                                                                                                                                                                                                                                                                             | 14463                                                                                                                                           | 10299                                                                                                                                                                                                                                      | 71,2                                                                                                                                                                                                                                                                            | 71,2                                                                                                                                                                                                                                                                            | 0,8                                                                                                                                                                                                                                                                                               | 1,5                                                                                                                                                                                                                  |
| Region 59                         | 2497                                                                                          | 1606                                                                                                                                                                                                                                      | 64                                                                                                                                                                                                                                                                                         | 64,3                                                                                                                                                                                                                                                                                       | 0,7                                                                                                                                                                                                                                                                                             | 21                                                                                                                                              | 21                                                                                                                                                                                                                                         | 100                                                                                                                                                                                                                                                                             | 100,0                                                                                                                                                                                                                                                                           | 1                                                                                                                                                                                                                                                                                                 | 1,7                                                                                                                                                                                                                  |
| Region 60                         | 1005                                                                                          | 466                                                                                                                                                                                                                                       | 46,5                                                                                                                                                                                                                                                                                       | 46,4                                                                                                                                                                                                                                                                                       | 0,5                                                                                                                                                                                                                                                                                             | 0                                                                                                                                               | 0                                                                                                                                                                                                                                          | 0                                                                                                                                                                                                                                                                               | 0,0                                                                                                                                                                                                                                                                             | 0                                                                                                                                                                                                                                                                                                 | 0,5                                                                                                                                                                                                                  |
| Region 61                         |                                                                                               |                                                                                                                                                                                                                                           | 0,3                                                                                                                                                                                                                                                                                        | 0,3                                                                                                                                                                                                                                                                                        | 0                                                                                                                                                                                                                                                                                               |                                                                                                                                                 |                                                                                                                                                                                                                                            | 0,2                                                                                                                                                                                                                                                                             | 0,2                                                                                                                                                                                                                                                                             | 0                                                                                                                                                                                                                                                                                                 | 0                                                                                                                                                                                                                    |
| Region 62                         |                                                                                               |                                                                                                                                                                                                                                           |                                                                                                                                                                                                                                                                                            | 0,0                                                                                                                                                                                                                                                                                        | 0                                                                                                                                                                                                                                                                                               |                                                                                                                                                 |                                                                                                                                                                                                                                            |                                                                                                                                                                                                                                                                                 | 0,0                                                                                                                                                                                                                                                                             | 0                                                                                                                                                                                                                                                                                                 | 0                                                                                                                                                                                                                    |
| Region 63                         | 3399                                                                                          | 2196                                                                                                                                                                                                                                      | 65                                                                                                                                                                                                                                                                                         | 64,6                                                                                                                                                                                                                                                                                       | 0,7                                                                                                                                                                                                                                                                                             | 5                                                                                                                                               | 5                                                                                                                                                                                                                                          | 100                                                                                                                                                                                                                                                                             | 100,0                                                                                                                                                                                                                                                                           | 1                                                                                                                                                                                                                                                                                                 | 1,7                                                                                                                                                                                                                  |
| Region 64                         | 150                                                                                           | 0                                                                                                                                                                                                                                         | -                                                                                                                                                                                                                                                                                          | 0,0                                                                                                                                                                                                                                                                                        | 0                                                                                                                                                                                                                                                                                               |                                                                                                                                                 |                                                                                                                                                                                                                                            |                                                                                                                                                                                                                                                                                 | 0,0                                                                                                                                                                                                                                                                             | 0                                                                                                                                                                                                                                                                                                 | 0                                                                                                                                                                                                                    |
| Region 65                         | 5660                                                                                          | 1079                                                                                                                                                                                                                                      | 19,1                                                                                                                                                                                                                                                                                       | 19,1                                                                                                                                                                                                                                                                                       | 0,2                                                                                                                                                                                                                                                                                             | 1505                                                                                                                                            | 1025                                                                                                                                                                                                                                       | 68,1                                                                                                                                                                                                                                                                            | 68,1                                                                                                                                                                                                                                                                            | 0,7                                                                                                                                                                                                                                                                                               | 0,9                                                                                                                                                                                                                  |
| Region 66                         |                                                                                               |                                                                                                                                                                                                                                           |                                                                                                                                                                                                                                                                                            | 0,0                                                                                                                                                                                                                                                                                        | 0                                                                                                                                                                                                                                                                                               |                                                                                                                                                 |                                                                                                                                                                                                                                            |                                                                                                                                                                                                                                                                                 | 0,0                                                                                                                                                                                                                                                                             | 0                                                                                                                                                                                                                                                                                                 | 0                                                                                                                                                                                                                    |
| Region 67                         | 2204,5                                                                                        | 0                                                                                                                                                                                                                                         | 0                                                                                                                                                                                                                                                                                          | 0,0                                                                                                                                                                                                                                                                                        | 0                                                                                                                                                                                                                                                                                               |                                                                                                                                                 |                                                                                                                                                                                                                                            |                                                                                                                                                                                                                                                                                 | 0,0                                                                                                                                                                                                                                                                             | 0                                                                                                                                                                                                                                                                                                 | 0                                                                                                                                                                                                                    |
| Region 68                         | 897                                                                                           | 490                                                                                                                                                                                                                                       | 50                                                                                                                                                                                                                                                                                         | 54,6                                                                                                                                                                                                                                                                                       | 0,5                                                                                                                                                                                                                                                                                             | 0                                                                                                                                               | 0                                                                                                                                                                                                                                          | 0                                                                                                                                                                                                                                                                               | 0,0                                                                                                                                                                                                                                                                             | 0                                                                                                                                                                                                                                                                                                 | 0,5                                                                                                                                                                                                                  |
| Region 69                         |                                                                                               |                                                                                                                                                                                                                                           |                                                                                                                                                                                                                                                                                            | 0,0                                                                                                                                                                                                                                                                                        | 0                                                                                                                                                                                                                                                                                               |                                                                                                                                                 |                                                                                                                                                                                                                                            |                                                                                                                                                                                                                                                                                 | 0,0                                                                                                                                                                                                                                                                             | 0                                                                                                                                                                                                                                                                                                 | 0                                                                                                                                                                                                                    |

**Indicators of the regional rehabilitation systems development in Russia (2018)**

| Regions of the Russian Federation | Total number of professionals providing rehabilitation and (or) habilitation measures for PwD | Number of professionals providing rehabilitation and (or) habilitation measures for PwD, who have updated skills and (or) been trained under programs including application of techniques on rehabilitation and (or) habilitation for PwD | The share of professionals providing rehabilitation and (or) habilitation measures for PwD, who have updated skills and (or) been trained under programs including application of techniques on rehabilitation and (or) habilitation for PwD in the total number of those professionals, % | The share of professionals providing rehabilitation and (or) habilitation measures for PwD, who have updated skills and (or) been trained under programs including application of techniques on rehabilitation and (or) habilitation for PwD in the total number of those professionals, % | The share of professionals providing rehabilitation and (or) habilitation measures for PwD, who have updated skills and (or) been trained under programs including application of techniques on rehabilitation and (or) habilitation for PwD in the total number of those professionals, points | The total number of professionals in educational organizations, who teach professionals providing rehabilitation and (or) habilitation measures | Number of professionals in educational organizations, who have been trained under programs on rehabilitation and habilitation for PwD for the last 5 years and teach professionals providing rehabilitation and (or) habilitation measures | The share of professionals in educational organizations, who have been trained under programs on rehabilitation and for PwD for the last 5 years and teach professionals providing rehabilitation and (or) habilitation measures in the total numbers of those professionals, % | The share of professionals in educational organizations, who have been trained under programs on rehabilitation and for PwD for the last 5 years and teach professionals providing rehabilitation and (or) habilitation measures in the total numbers of those professionals, % | The share of professionals in educational organizations, who have been trained under programs on rehabilitation and habilitation for PwD for the last 5 years and teach professionals providing rehabilitation and (or) habilitation measures in the total numbers of those professionals, points | The staffing of organizations providing rehabilitation and (or) habilitation services with specialists of the appropriate profile based on the needs of PwD in rehabilitation and (or) habilitation services, points |
|-----------------------------------|-----------------------------------------------------------------------------------------------|-------------------------------------------------------------------------------------------------------------------------------------------------------------------------------------------------------------------------------------------|--------------------------------------------------------------------------------------------------------------------------------------------------------------------------------------------------------------------------------------------------------------------------------------------|--------------------------------------------------------------------------------------------------------------------------------------------------------------------------------------------------------------------------------------------------------------------------------------------|-------------------------------------------------------------------------------------------------------------------------------------------------------------------------------------------------------------------------------------------------------------------------------------------------|-------------------------------------------------------------------------------------------------------------------------------------------------|--------------------------------------------------------------------------------------------------------------------------------------------------------------------------------------------------------------------------------------------|---------------------------------------------------------------------------------------------------------------------------------------------------------------------------------------------------------------------------------------------------------------------------------|---------------------------------------------------------------------------------------------------------------------------------------------------------------------------------------------------------------------------------------------------------------------------------|---------------------------------------------------------------------------------------------------------------------------------------------------------------------------------------------------------------------------------------------------------------------------------------------------|----------------------------------------------------------------------------------------------------------------------------------------------------------------------------------------------------------------------|
| Region 70                         | 3622                                                                                          | 254                                                                                                                                                                                                                                       | 7                                                                                                                                                                                                                                                                                          | 7,0                                                                                                                                                                                                                                                                                        | 0,1                                                                                                                                                                                                                                                                                             | 10                                                                                                                                              |                                                                                                                                                                                                                                            |                                                                                                                                                                                                                                                                                 | 0,0                                                                                                                                                                                                                                                                             | 0                                                                                                                                                                                                                                                                                                 | 0,1                                                                                                                                                                                                                  |
| Region 71                         | 52                                                                                            | 36                                                                                                                                                                                                                                        | 69,2                                                                                                                                                                                                                                                                                       | 69,2                                                                                                                                                                                                                                                                                       | 0,7                                                                                                                                                                                                                                                                                             | 0                                                                                                                                               | 0                                                                                                                                                                                                                                          | 0                                                                                                                                                                                                                                                                               | 0,0                                                                                                                                                                                                                                                                             | 0                                                                                                                                                                                                                                                                                                 | 0,7                                                                                                                                                                                                                  |
| Region 72                         | 13502                                                                                         | 13502                                                                                                                                                                                                                                     | 100                                                                                                                                                                                                                                                                                        | 100,0                                                                                                                                                                                                                                                                                      | 1                                                                                                                                                                                                                                                                                               | 0                                                                                                                                               | 0                                                                                                                                                                                                                                          | 0                                                                                                                                                                                                                                                                               | 0,0                                                                                                                                                                                                                                                                             | 0                                                                                                                                                                                                                                                                                                 | 1                                                                                                                                                                                                                    |
| Region 73                         |                                                                                               |                                                                                                                                                                                                                                           | 0,5                                                                                                                                                                                                                                                                                        | 0,5                                                                                                                                                                                                                                                                                        | 0                                                                                                                                                                                                                                                                                               |                                                                                                                                                 |                                                                                                                                                                                                                                            | 0,8                                                                                                                                                                                                                                                                             | 0,8                                                                                                                                                                                                                                                                             | 0                                                                                                                                                                                                                                                                                                 | 0                                                                                                                                                                                                                    |
| Region 74                         |                                                                                               |                                                                                                                                                                                                                                           |                                                                                                                                                                                                                                                                                            | 0,0                                                                                                                                                                                                                                                                                        | 0                                                                                                                                                                                                                                                                                               |                                                                                                                                                 |                                                                                                                                                                                                                                            |                                                                                                                                                                                                                                                                                 | 0,0                                                                                                                                                                                                                                                                             | 0                                                                                                                                                                                                                                                                                                 | 0                                                                                                                                                                                                                    |
| Region 75                         |                                                                                               |                                                                                                                                                                                                                                           | 1                                                                                                                                                                                                                                                                                          | 1,0                                                                                                                                                                                                                                                                                        | 0                                                                                                                                                                                                                                                                                               |                                                                                                                                                 |                                                                                                                                                                                                                                            | 1                                                                                                                                                                                                                                                                               | 1,0                                                                                                                                                                                                                                                                             | 0                                                                                                                                                                                                                                                                                                 | 0                                                                                                                                                                                                                    |
| Region 76                         | 112                                                                                           | 39                                                                                                                                                                                                                                        | 34                                                                                                                                                                                                                                                                                         | 34,8                                                                                                                                                                                                                                                                                       | 0,3                                                                                                                                                                                                                                                                                             | 0                                                                                                                                               | 0                                                                                                                                                                                                                                          | 0                                                                                                                                                                                                                                                                               | 0,0                                                                                                                                                                                                                                                                             | 0                                                                                                                                                                                                                                                                                                 | 0,3                                                                                                                                                                                                                  |
| Region 77                         |                                                                                               |                                                                                                                                                                                                                                           |                                                                                                                                                                                                                                                                                            | 0,0                                                                                                                                                                                                                                                                                        | 0                                                                                                                                                                                                                                                                                               |                                                                                                                                                 |                                                                                                                                                                                                                                            |                                                                                                                                                                                                                                                                                 | 0,0                                                                                                                                                                                                                                                                             | 0                                                                                                                                                                                                                                                                                                 | 0                                                                                                                                                                                                                    |
| Region 78                         |                                                                                               |                                                                                                                                                                                                                                           | 0,3                                                                                                                                                                                                                                                                                        | 0,3                                                                                                                                                                                                                                                                                        | 0                                                                                                                                                                                                                                                                                               |                                                                                                                                                 |                                                                                                                                                                                                                                            | 1                                                                                                                                                                                                                                                                               | 1,0                                                                                                                                                                                                                                                                             | 0                                                                                                                                                                                                                                                                                                 | 0                                                                                                                                                                                                                    |
| Region 79                         |                                                                                               |                                                                                                                                                                                                                                           | 0,4                                                                                                                                                                                                                                                                                        | 0,4                                                                                                                                                                                                                                                                                        | 0                                                                                                                                                                                                                                                                                               |                                                                                                                                                 |                                                                                                                                                                                                                                            | 0,6                                                                                                                                                                                                                                                                             | 0,6                                                                                                                                                                                                                                                                             | 0                                                                                                                                                                                                                                                                                                 | 0                                                                                                                                                                                                                    |
| Region 80                         | 183                                                                                           | 39                                                                                                                                                                                                                                        | 0,3                                                                                                                                                                                                                                                                                        | 21,3                                                                                                                                                                                                                                                                                       | 0,3                                                                                                                                                                                                                                                                                             | 93                                                                                                                                              | 86                                                                                                                                                                                                                                         | 1                                                                                                                                                                                                                                                                               | 92,5                                                                                                                                                                                                                                                                            | 1                                                                                                                                                                                                                                                                                                 | 1,3                                                                                                                                                                                                                  |
| Region 81                         |                                                                                               |                                                                                                                                                                                                                                           |                                                                                                                                                                                                                                                                                            | 0,0                                                                                                                                                                                                                                                                                        | 0                                                                                                                                                                                                                                                                                               |                                                                                                                                                 |                                                                                                                                                                                                                                            |                                                                                                                                                                                                                                                                                 | 0,0                                                                                                                                                                                                                                                                             | 0                                                                                                                                                                                                                                                                                                 | 0                                                                                                                                                                                                                    |
| Region 82                         |                                                                                               | 1159                                                                                                                                                                                                                                      | 0,5                                                                                                                                                                                                                                                                                        | 0,0                                                                                                                                                                                                                                                                                        | 0                                                                                                                                                                                                                                                                                               |                                                                                                                                                 | 700                                                                                                                                                                                                                                        | 0,3                                                                                                                                                                                                                                                                             | 0,0                                                                                                                                                                                                                                                                             | 0                                                                                                                                                                                                                                                                                                 | 0                                                                                                                                                                                                                    |
| Region 83                         | 9490                                                                                          | 6746                                                                                                                                                                                                                                      | 0,7                                                                                                                                                                                                                                                                                        | 71,1                                                                                                                                                                                                                                                                                       | 0,8                                                                                                                                                                                                                                                                                             | 2518                                                                                                                                            | 198                                                                                                                                                                                                                                        | 0,1                                                                                                                                                                                                                                                                             | 7,9                                                                                                                                                                                                                                                                             | 0,1                                                                                                                                                                                                                                                                                               | 0,9                                                                                                                                                                                                                  |
| Region 84                         |                                                                                               |                                                                                                                                                                                                                                           | 41,1                                                                                                                                                                                                                                                                                       | 41,1                                                                                                                                                                                                                                                                                       | 0,5                                                                                                                                                                                                                                                                                             |                                                                                                                                                 | 169                                                                                                                                                                                                                                        | 23,4                                                                                                                                                                                                                                                                            | 0,0                                                                                                                                                                                                                                                                             | 0                                                                                                                                                                                                                                                                                                 | 0,5                                                                                                                                                                                                                  |
| Region 85                         |                                                                                               |                                                                                                                                                                                                                                           | 40                                                                                                                                                                                                                                                                                         | 40                                                                                                                                                                                                                                                                                         | 0,5                                                                                                                                                                                                                                                                                             |                                                                                                                                                 |                                                                                                                                                                                                                                            | 20                                                                                                                                                                                                                                                                              | 20,0                                                                                                                                                                                                                                                                            | 0,3                                                                                                                                                                                                                                                                                               | 0,8                                                                                                                                                                                                                  |

**Indicators of the regional rehabilitation systems development in Russia (2018)**

| Regions of the Russian Federation | Availability of an interagency information system (presence - 1 point, absence - 0 point) | Total number of PwD in the region | Total number of PwD in the region | Number of PwD, whose data are stored in the interagency information system | The share of PwD, whose data are stored in the interagency information system, % | The share of PwD, whose data are stored in the interagency information system, points | Number of organizations providing rehabilitation and (or) habilitation measures in the region | Number of organizations providing rehabilitation and (or) habilitation measures in the regions and connected to the interagency information system | The share of organizations providing rehabilitation and (or) habilitation measures in the regions and connected to the interagency information system in the total number of those organizations, % | The share of organizations providing rehabilitation and (or) habilitation measures in the regions and connected to the interagency information system in the total number of those organizations, % | The share of organizations providing rehabilitation and (or) habilitation measures in the regions and connected to the interagency information system in the total number of those organizations, points | The share of PwD who received measures that were written in the individual rehabilitation/habilitation programs and determined by the regional agencies in the total number of PwD who received the individual rehabilitation/habilitation programs in the bureaus of medical and social expertise in the assessment period, % | The share of PwD who received measures that were written in the individual rehabilitation/habilitation programs and determined by the regional agencies in the total number of PwD who received the individual rehabilitation/habilitation programs in the bureaus of medical and social expertise in the assessment period, points | The formation of the information base of the regional system, taking into account information about the needs of PwD in rehabilitation and (or) habilitation services, points |
|-----------------------------------|-------------------------------------------------------------------------------------------|-----------------------------------|-----------------------------------|----------------------------------------------------------------------------|----------------------------------------------------------------------------------|---------------------------------------------------------------------------------------|-----------------------------------------------------------------------------------------------|----------------------------------------------------------------------------------------------------------------------------------------------------|-----------------------------------------------------------------------------------------------------------------------------------------------------------------------------------------------------|-----------------------------------------------------------------------------------------------------------------------------------------------------------------------------------------------------|----------------------------------------------------------------------------------------------------------------------------------------------------------------------------------------------------------|--------------------------------------------------------------------------------------------------------------------------------------------------------------------------------------------------------------------------------------------------------------------------------------------------------------------------------|-------------------------------------------------------------------------------------------------------------------------------------------------------------------------------------------------------------------------------------------------------------------------------------------------------------------------------------|-------------------------------------------------------------------------------------------------------------------------------------------------------------------------------|
| Region 1                          | 0                                                                                         | 182874                            | 0                                 | 0                                                                          | 0,0                                                                              | 0                                                                                     | 0                                                                                             | 0                                                                                                                                                  | 0                                                                                                                                                                                                   | 0,0                                                                                                                                                                                                 | 0                                                                                                                                                                                                        | 17                                                                                                                                                                                                                                                                                                                             | 0                                                                                                                                                                                                                                                                                                                                   | 0                                                                                                                                                                             |
| Region 2                          | 0                                                                                         | 90876                             | 0                                 | 0                                                                          | 0,0                                                                              | 0                                                                                     | 0                                                                                             | 0                                                                                                                                                  | 0                                                                                                                                                                                                   | 0,0                                                                                                                                                                                                 | 0                                                                                                                                                                                                        | 0                                                                                                                                                                                                                                                                                                                              | 0                                                                                                                                                                                                                                                                                                                                   | 0                                                                                                                                                                             |
| Region 3                          | 0                                                                                         | 204720                            | 0                                 | 0                                                                          | 0,0                                                                              | 0                                                                                     | 17                                                                                            | 0                                                                                                                                                  | 0                                                                                                                                                                                                   | 0,0                                                                                                                                                                                                 | 0                                                                                                                                                                                                        | 10                                                                                                                                                                                                                                                                                                                             | 0,5                                                                                                                                                                                                                                                                                                                                 | 0,5                                                                                                                                                                           |
| Region 4                          | 0                                                                                         | 111992                            |                                   |                                                                            | 0,0                                                                              | 0                                                                                     | 0                                                                                             | 0                                                                                                                                                  |                                                                                                                                                                                                     | 0,0                                                                                                                                                                                                 | 0                                                                                                                                                                                                        | 11-14                                                                                                                                                                                                                                                                                                                          | 0                                                                                                                                                                                                                                                                                                                                   | 0                                                                                                                                                                             |
| Region 5                          | 1                                                                                         | 130693                            | 74754                             | 57,1                                                                       | 57,2                                                                             | 0,5                                                                                   | 559                                                                                           | 417                                                                                                                                                | 74,5                                                                                                                                                                                                | 74,6                                                                                                                                                                                                | 0,7                                                                                                                                                                                                      | 14                                                                                                                                                                                                                                                                                                                             | 0,8                                                                                                                                                                                                                                                                                                                                 | 3                                                                                                                                                                             |
| Region 6                          | 1                                                                                         | 40663                             | 40663                             | 1                                                                          | 100,0                                                                            | 1                                                                                     | 172                                                                                           | 107                                                                                                                                                | 1                                                                                                                                                                                                   | 62,2                                                                                                                                                                                                | 0,6                                                                                                                                                                                                      | 0,6                                                                                                                                                                                                                                                                                                                            | 0                                                                                                                                                                                                                                                                                                                                   | 2,6                                                                                                                                                                           |
| Region 7                          | 1                                                                                         | 102126                            | 31035                             | 329                                                                        | 30,4                                                                             | 0,3                                                                                   | 148                                                                                           | 148                                                                                                                                                | 100                                                                                                                                                                                                 | 100,0                                                                                                                                                                                               | 1                                                                                                                                                                                                        | 12                                                                                                                                                                                                                                                                                                                             | 0,8                                                                                                                                                                                                                                                                                                                                 | 3,1                                                                                                                                                                           |
| Region 8                          | 0                                                                                         | 216224                            | 0                                 | 0                                                                          | 0,0                                                                              | 0                                                                                     | 166                                                                                           | 0                                                                                                                                                  | 0                                                                                                                                                                                                   | 0,0                                                                                                                                                                                                 | 0                                                                                                                                                                                                        | 15                                                                                                                                                                                                                                                                                                                             | 1                                                                                                                                                                                                                                                                                                                                   | 1                                                                                                                                                                             |
| Region 9                          |                                                                                           | 10500000                          | 1045177                           |                                                                            | 10,0                                                                             | 0,1                                                                                   | 161                                                                                           | 0                                                                                                                                                  |                                                                                                                                                                                                     | 0,0                                                                                                                                                                                                 | 0                                                                                                                                                                                                        | 0                                                                                                                                                                                                                                                                                                                              | 0                                                                                                                                                                                                                                                                                                                                   | 0,1                                                                                                                                                                           |
| Region 10                         | 1                                                                                         | 587765                            | 0                                 | 0                                                                          | 0,0                                                                              | 0                                                                                     | 532                                                                                           | 532                                                                                                                                                | 1                                                                                                                                                                                                   | 100,0                                                                                                                                                                                               | 1                                                                                                                                                                                                        | 1                                                                                                                                                                                                                                                                                                                              | 0                                                                                                                                                                                                                                                                                                                                   | 2                                                                                                                                                                             |
| Region 11                         | 0                                                                                         | 21310                             | 0                                 | 0                                                                          | 0,0                                                                              | 0                                                                                     | 177                                                                                           | 0                                                                                                                                                  | 0                                                                                                                                                                                                   | 0,0                                                                                                                                                                                                 | 0                                                                                                                                                                                                        | 171                                                                                                                                                                                                                                                                                                                            | 0                                                                                                                                                                                                                                                                                                                                   | 0                                                                                                                                                                             |
| Region 12                         | 0                                                                                         | 13606                             | 0                                 | 0                                                                          | 0,0                                                                              | 0                                                                                     | 93                                                                                            | 0                                                                                                                                                  | 0                                                                                                                                                                                                   | 0,0                                                                                                                                                                                                 | 0                                                                                                                                                                                                        | 58                                                                                                                                                                                                                                                                                                                             | 0                                                                                                                                                                                                                                                                                                                                   | 0                                                                                                                                                                             |
| Region 13                         | 1                                                                                         | 81662                             | 10764                             | 0,1                                                                        | 13,2                                                                             | 0,1                                                                                   | 9                                                                                             | 4                                                                                                                                                  | 0,4                                                                                                                                                                                                 | 44,4                                                                                                                                                                                                | 0,4                                                                                                                                                                                                      | 1                                                                                                                                                                                                                                                                                                                              | 0                                                                                                                                                                                                                                                                                                                                   | 1,5                                                                                                                                                                           |
| Region 14                         | 0                                                                                         | 218074                            |                                   |                                                                            | 0,0                                                                              | 0                                                                                     | 362                                                                                           | 0                                                                                                                                                  |                                                                                                                                                                                                     | 0,0                                                                                                                                                                                                 | 0                                                                                                                                                                                                        | 6                                                                                                                                                                                                                                                                                                                              | 0,3                                                                                                                                                                                                                                                                                                                                 | 0,3                                                                                                                                                                           |
| Region 15                         | 1                                                                                         | 73145                             | 73145                             | 100                                                                        | 100,0                                                                            | 1                                                                                     | 410                                                                                           | 56                                                                                                                                                 | 13,7                                                                                                                                                                                                | 13,7                                                                                                                                                                                                | 0,1                                                                                                                                                                                                      | 15                                                                                                                                                                                                                                                                                                                             | 1                                                                                                                                                                                                                                                                                                                                   | 3,1                                                                                                                                                                           |
| Region 16                         | 1                                                                                         | 76793                             |                                   | 0,3                                                                        | 0,0                                                                              | 0                                                                                     | 0                                                                                             | 0                                                                                                                                                  | 0,6                                                                                                                                                                                                 | 0,0                                                                                                                                                                                                 | 0                                                                                                                                                                                                        | 0,8                                                                                                                                                                                                                                                                                                                            | 0                                                                                                                                                                                                                                                                                                                                   | 1                                                                                                                                                                             |
| Region 17                         | 0                                                                                         | 234418                            | 223698                            | 0                                                                          | 95,4                                                                             | 0,9                                                                                   | 194                                                                                           | 0                                                                                                                                                  | 0                                                                                                                                                                                                   | 0,0                                                                                                                                                                                                 | 0                                                                                                                                                                                                        | 182                                                                                                                                                                                                                                                                                                                            | 0                                                                                                                                                                                                                                                                                                                                   | 0,9                                                                                                                                                                           |
| Region 18                         | 1                                                                                         | 129672                            | 94060                             | 73                                                                         | 72,5                                                                             | 0,7                                                                                   | 48                                                                                            | 10                                                                                                                                                 | 21%                                                                                                                                                                                                 | 20,8                                                                                                                                                                                                | 0,2                                                                                                                                                                                                      | 17                                                                                                                                                                                                                                                                                                                             | 0                                                                                                                                                                                                                                                                                                                                   | 1,9                                                                                                                                                                           |
| Region 19                         | 0                                                                                         | 61864                             | 0                                 | 0                                                                          | 0,0                                                                              | 0                                                                                     | 125                                                                                           | 0                                                                                                                                                  | 0                                                                                                                                                                                                   | 0,0                                                                                                                                                                                                 | 0                                                                                                                                                                                                        | 1                                                                                                                                                                                                                                                                                                                              | 0                                                                                                                                                                                                                                                                                                                                   | 0                                                                                                                                                                             |
| Region 20                         | 1                                                                                         | 449350                            | 104756                            | 23,3                                                                       | 23,3                                                                             | 0,2                                                                                   | 195                                                                                           | 165                                                                                                                                                | 84,6                                                                                                                                                                                                | 84,6                                                                                                                                                                                                | 0,8                                                                                                                                                                                                      | 15                                                                                                                                                                                                                                                                                                                             | 1                                                                                                                                                                                                                                                                                                                                   | 3                                                                                                                                                                             |
| Region 21                         | 1                                                                                         | 76493                             | 35860                             | 46,9                                                                       | 46,9                                                                             | 0,4                                                                                   | 101                                                                                           | 99                                                                                                                                                 | 98                                                                                                                                                                                                  | 98,0                                                                                                                                                                                                | 0,9                                                                                                                                                                                                      | 18                                                                                                                                                                                                                                                                                                                             | 0                                                                                                                                                                                                                                                                                                                                   | 2,3                                                                                                                                                                           |
| Region 22                         | 1                                                                                         | 422788                            | 422788                            | 1                                                                          | 100,0                                                                            | 1                                                                                     | 1249                                                                                          | 1112                                                                                                                                               | 0,8                                                                                                                                                                                                 | 89,0                                                                                                                                                                                                | 0,8                                                                                                                                                                                                      | 1                                                                                                                                                                                                                                                                                                                              | 0                                                                                                                                                                                                                                                                                                                                   | 2,8                                                                                                                                                                           |
| Region 23                         | 0                                                                                         | 31231                             | 0                                 | 0                                                                          | 0,0                                                                              | 0                                                                                     | 482                                                                                           | 0                                                                                                                                                  | 0                                                                                                                                                                                                   | 0,0                                                                                                                                                                                                 | 0                                                                                                                                                                                                        | 32                                                                                                                                                                                                                                                                                                                             | 0                                                                                                                                                                                                                                                                                                                                   | 0                                                                                                                                                                             |
| Region 24                         | 0                                                                                         | 2922                              | 0                                 | 0                                                                          | 0,0                                                                              | 0                                                                                     | 0                                                                                             | 0                                                                                                                                                  | 0                                                                                                                                                                                                   | 0,0                                                                                                                                                                                                 | 0                                                                                                                                                                                                        | 0                                                                                                                                                                                                                                                                                                                              | 0                                                                                                                                                                                                                                                                                                                                   | 0                                                                                                                                                                             |
| Region 25                         | 0                                                                                         | 302446                            | 0                                 | 0                                                                          | 0,0                                                                              | 0                                                                                     | 1907                                                                                          | 0                                                                                                                                                  | 0                                                                                                                                                                                                   | 0,0                                                                                                                                                                                                 | 0                                                                                                                                                                                                        | 1                                                                                                                                                                                                                                                                                                                              | 0                                                                                                                                                                                                                                                                                                                                   | 0                                                                                                                                                                             |
| Region 26                         | 0                                                                                         | 60514                             | 0                                 | 0                                                                          | 0,0                                                                              | 0                                                                                     | 347                                                                                           | 0                                                                                                                                                  | 0                                                                                                                                                                                                   | 0,0                                                                                                                                                                                                 | 0                                                                                                                                                                                                        | 11342                                                                                                                                                                                                                                                                                                                          | 0                                                                                                                                                                                                                                                                                                                                   | 0                                                                                                                                                                             |
| Region 27                         | 1                                                                                         | 192881                            |                                   | 0,6                                                                        | 0,0                                                                              | 0                                                                                     | 0                                                                                             | 0                                                                                                                                                  | 0,6                                                                                                                                                                                                 | 0,0                                                                                                                                                                                                 | 0                                                                                                                                                                                                        | 0,8                                                                                                                                                                                                                                                                                                                            | 0                                                                                                                                                                                                                                                                                                                                   | 1                                                                                                                                                                             |
| Region 28                         | 1                                                                                         | 133028                            | 39175                             | 29,45                                                                      | 29,4                                                                             | 0,2                                                                                   | 1550                                                                                          | 146                                                                                                                                                | 9,4                                                                                                                                                                                                 | 9,4                                                                                                                                                                                                 | 0,1                                                                                                                                                                                                      | 17                                                                                                                                                                                                                                                                                                                             | 0                                                                                                                                                                                                                                                                                                                                   | 1,3                                                                                                                                                                           |
| Region 29                         | 0                                                                                         | 199594                            |                                   | 20                                                                         | 0,0                                                                              | 0                                                                                     | 0                                                                                             | 0                                                                                                                                                  | 20                                                                                                                                                                                                  | 0,0                                                                                                                                                                                                 | 0                                                                                                                                                                                                        | 21                                                                                                                                                                                                                                                                                                                             | 0                                                                                                                                                                                                                                                                                                                                   | 0                                                                                                                                                                             |
| Region 30                         | 0                                                                                         | 64283                             | 62101                             | 0                                                                          | 0,0                                                                              | 0                                                                                     | 153                                                                                           | 0                                                                                                                                                  | 0                                                                                                                                                                                                   | 0,0                                                                                                                                                                                                 | 0                                                                                                                                                                                                        | 18                                                                                                                                                                                                                                                                                                                             | 0                                                                                                                                                                                                                                                                                                                                   | 0                                                                                                                                                                             |
| Region 31                         | 0                                                                                         | 96371                             | 0                                 | 0                                                                          | 0,0                                                                              | 0                                                                                     | 5                                                                                             | 0                                                                                                                                                  | 0                                                                                                                                                                                                   | 0,0                                                                                                                                                                                                 | 0                                                                                                                                                                                                        | 22653                                                                                                                                                                                                                                                                                                                          | 0                                                                                                                                                                                                                                                                                                                                   | 0                                                                                                                                                                             |

**Indicators of the regional rehabilitation systems development in Russia (2018)**

| Regions of the Russian Federation | Availability of an interagency information system (presence - 1 point, absence - 0 point) | Total number of PwD in the region | Total number of PwD in the region | Number of PwD, whose data are stored in the interagency information system | The share of PwD, whose data are stored in the interagency information system, % | The share of PwD, whose data are stored in the interagency information system, points | Number of organizations providing rehabilitation and (or) habilitation measures in the region | Number of organizations providing rehabilitation and (or) habilitation measures in the regions and connected to the interagency information system | The share of organizations providing rehabilitation and (or) habilitation measures in the regions and connected to the interagency information system in the total number of those organizations, % | The share of organizations providing rehabilitation and (or) habilitation measures in the regions and connected to the interagency information system in the total number of those organizations, % | The share of organizations providing rehabilitation and (or) habilitation measures in the regions and connected to the interagency information system in the total number of those organizations, points | The share of PwD who received measures that were written in the individual rehabilitation/habilitation programs and determined by the regional agencies in the total number of PwD who received the individual rehabilitation/habilitation programs in the bureaus of medical and social expertise in the assessment period, % | The share of PwD who received measures that were written in the individual rehabilitation/habilitation programs and determined by the regional agencies in the total number of PwD who received the individual rehabilitation/habilitation programs in the bureaus of medical and social expertise in the assessment period, points | The formation of the information base of the regional system, taking into account information about the needs of PwD in rehabilitation and (or) habilitation services, points |
|-----------------------------------|-------------------------------------------------------------------------------------------|-----------------------------------|-----------------------------------|----------------------------------------------------------------------------|----------------------------------------------------------------------------------|---------------------------------------------------------------------------------------|-----------------------------------------------------------------------------------------------|----------------------------------------------------------------------------------------------------------------------------------------------------|-----------------------------------------------------------------------------------------------------------------------------------------------------------------------------------------------------|-----------------------------------------------------------------------------------------------------------------------------------------------------------------------------------------------------|----------------------------------------------------------------------------------------------------------------------------------------------------------------------------------------------------------|--------------------------------------------------------------------------------------------------------------------------------------------------------------------------------------------------------------------------------------------------------------------------------------------------------------------------------|-------------------------------------------------------------------------------------------------------------------------------------------------------------------------------------------------------------------------------------------------------------------------------------------------------------------------------------|-------------------------------------------------------------------------------------------------------------------------------------------------------------------------------|
| Region 32                         |                                                                                           | 116088                            |                                   |                                                                            | 0,0                                                                              | 0                                                                                     | 0                                                                                             | 0                                                                                                                                                  |                                                                                                                                                                                                     | 0,0                                                                                                                                                                                                 | 0                                                                                                                                                                                                        |                                                                                                                                                                                                                                                                                                                                | 0                                                                                                                                                                                                                                                                                                                                   | 0                                                                                                                                                                             |
| Region 33                         | 1                                                                                         | 48235                             | 48235                             | 1                                                                          | 100,0                                                                            | 1                                                                                     | 314                                                                                           | 118                                                                                                                                                | 0,2                                                                                                                                                                                                 | 37,6                                                                                                                                                                                                | 0,3                                                                                                                                                                                                      | 15                                                                                                                                                                                                                                                                                                                             | 0                                                                                                                                                                                                                                                                                                                                   | 2,3                                                                                                                                                                           |
| Region 34                         | 1                                                                                         | 23802                             | 20502                             | 0,8                                                                        | 86,1                                                                             | 0,8                                                                                   | 265                                                                                           | 258                                                                                                                                                | 0,9                                                                                                                                                                                                 | 97,4                                                                                                                                                                                                | 0,9                                                                                                                                                                                                      | 0,8                                                                                                                                                                                                                                                                                                                            | 0                                                                                                                                                                                                                                                                                                                                   | 2,7                                                                                                                                                                           |
| Region 35                         | 0                                                                                         | 23150                             |                                   | 0                                                                          | 0,0                                                                              | 0                                                                                     | 0                                                                                             | 0                                                                                                                                                  | 0                                                                                                                                                                                                   | 0,0                                                                                                                                                                                                 | 0                                                                                                                                                                                                        | 15                                                                                                                                                                                                                                                                                                                             | 1                                                                                                                                                                                                                                                                                                                                   | 1                                                                                                                                                                             |
| Region 36                         | 0                                                                                         | 66112                             | 0                                 | 0                                                                          | 0,0                                                                              | 0                                                                                     | 332                                                                                           | 0                                                                                                                                                  | 0                                                                                                                                                                                                   | 0,0                                                                                                                                                                                                 | 0                                                                                                                                                                                                        | 1                                                                                                                                                                                                                                                                                                                              | 0                                                                                                                                                                                                                                                                                                                                   | 0                                                                                                                                                                             |
| Region 37                         | 0                                                                                         | 63704                             | 0                                 | 0                                                                          | 0,0                                                                              | 0                                                                                     | 872                                                                                           | 0                                                                                                                                                  | 0                                                                                                                                                                                                   | 0,0                                                                                                                                                                                                 | 0                                                                                                                                                                                                        | 15                                                                                                                                                                                                                                                                                                                             | 1                                                                                                                                                                                                                                                                                                                                   | 1                                                                                                                                                                             |
| Region 38                         | 0                                                                                         | 131179                            | 124428                            | 0                                                                          | 0,0                                                                              | 0                                                                                     | 42                                                                                            | 0                                                                                                                                                  | 0                                                                                                                                                                                                   | 0,0                                                                                                                                                                                                 | 0                                                                                                                                                                                                        | 0,5                                                                                                                                                                                                                                                                                                                            | 0                                                                                                                                                                                                                                                                                                                                   | 0                                                                                                                                                                             |
| Region 39                         | 1                                                                                         | 72055                             | 6746                              | 1068,1                                                                     | 9,4                                                                              | 0,1                                                                                   | 354                                                                                           | 64                                                                                                                                                 | 553,1                                                                                                                                                                                               | 18,1                                                                                                                                                                                                | 0,1                                                                                                                                                                                                      | 1428                                                                                                                                                                                                                                                                                                                           | 0                                                                                                                                                                                                                                                                                                                                   | 1,2                                                                                                                                                                           |
| Region 40                         | 1                                                                                         | 69998                             | 0                                 | 0                                                                          | 0,0                                                                              | 0                                                                                     | 64                                                                                            | 0                                                                                                                                                  | 0                                                                                                                                                                                                   | 0,0                                                                                                                                                                                                 | 0                                                                                                                                                                                                        | 15                                                                                                                                                                                                                                                                                                                             | 1                                                                                                                                                                                                                                                                                                                                   | 2                                                                                                                                                                             |
| Region 41                         | 1                                                                                         | 284055                            | 252808                            | 89                                                                         | 89,0                                                                             | 0,8                                                                                   | 322                                                                                           | 290                                                                                                                                                | 90                                                                                                                                                                                                  | 90,1                                                                                                                                                                                                | 0,9                                                                                                                                                                                                      | 13                                                                                                                                                                                                                                                                                                                             | 0,8                                                                                                                                                                                                                                                                                                                                 | 3,5                                                                                                                                                                           |
| Region 42                         | ?                                                                                         | 369355                            |                                   |                                                                            | 0,0                                                                              | 0                                                                                     | 0                                                                                             | 0                                                                                                                                                  |                                                                                                                                                                                                     | 0,0                                                                                                                                                                                                 | 0                                                                                                                                                                                                        |                                                                                                                                                                                                                                                                                                                                | 0                                                                                                                                                                                                                                                                                                                                   | 0                                                                                                                                                                             |
| Region 43                         | 0                                                                                         | 133549                            | 0                                 | 0                                                                          | 0,0                                                                              | 0                                                                                     | 178                                                                                           | 0                                                                                                                                                  | 0                                                                                                                                                                                                   | 0,0                                                                                                                                                                                                 | 0                                                                                                                                                                                                        | 12                                                                                                                                                                                                                                                                                                                             | 0,8                                                                                                                                                                                                                                                                                                                                 | 0,8                                                                                                                                                                           |
| Region 44                         | 0                                                                                         | 230858                            | 0                                 | 0                                                                          | 0,0                                                                              | 0                                                                                     | 107                                                                                           | 0                                                                                                                                                  | 0                                                                                                                                                                                                   | 0,0                                                                                                                                                                                                 | 0                                                                                                                                                                                                        | 13                                                                                                                                                                                                                                                                                                                             | 0,8                                                                                                                                                                                                                                                                                                                                 | 0,8                                                                                                                                                                           |
| Region 45                         | 0                                                                                         | 21723                             | 0                                 | 0                                                                          | 0,0                                                                              | 0                                                                                     | 2                                                                                             | 0                                                                                                                                                  | 0                                                                                                                                                                                                   | 0,0                                                                                                                                                                                                 | 0                                                                                                                                                                                                        | 71                                                                                                                                                                                                                                                                                                                             | 0                                                                                                                                                                                                                                                                                                                                   | 0                                                                                                                                                                             |
| Region 46                         | 1                                                                                         | 292063                            |                                   | 37,8                                                                       | 0,0                                                                              | 0                                                                                     | 67,6                                                                                          | 0                                                                                                                                                  |                                                                                                                                                                                                     | 0,0                                                                                                                                                                                                 | 0                                                                                                                                                                                                        | 178222                                                                                                                                                                                                                                                                                                                         | 0                                                                                                                                                                                                                                                                                                                                   | 1                                                                                                                                                                             |
| Region 47                         | 1                                                                                         | 78408                             | 78408                             | 1                                                                          | 100,0                                                                            | 1                                                                                     | 33                                                                                            | 9                                                                                                                                                  | 0,2                                                                                                                                                                                                 | 27,3                                                                                                                                                                                                | 0,2                                                                                                                                                                                                      | 1                                                                                                                                                                                                                                                                                                                              | 0                                                                                                                                                                                                                                                                                                                                   | 2,2                                                                                                                                                                           |
| Region 48                         | 1                                                                                         | 225287                            | 97036                             | 43,1                                                                       | 43,1                                                                             | 0,4                                                                                   | 1198                                                                                          | 899                                                                                                                                                | 75                                                                                                                                                                                                  | 75,0                                                                                                                                                                                                | 0,7                                                                                                                                                                                                      | 15                                                                                                                                                                                                                                                                                                                             | 1                                                                                                                                                                                                                                                                                                                                   | 3,1                                                                                                                                                                           |
| Region 49                         | 0                                                                                         | 102498                            | 0                                 | 0                                                                          | 0,0                                                                              | 0                                                                                     | 91                                                                                            | 0                                                                                                                                                  | 0                                                                                                                                                                                                   | 0,0                                                                                                                                                                                                 | 0                                                                                                                                                                                                        | 0,5                                                                                                                                                                                                                                                                                                                            | 0                                                                                                                                                                                                                                                                                                                                   | 0                                                                                                                                                                             |
| Region 50                         | 1                                                                                         | 153300                            |                                   | 100                                                                        | 0,0                                                                              | 0                                                                                     | 0                                                                                             | 0                                                                                                                                                  | 21                                                                                                                                                                                                  | 0,0                                                                                                                                                                                                 | 0                                                                                                                                                                                                        | 21                                                                                                                                                                                                                                                                                                                             | 0                                                                                                                                                                                                                                                                                                                                   | 1                                                                                                                                                                             |
| Region 51                         | 1                                                                                         | 100450                            | 100450                            | 100                                                                        | 100,0                                                                            | 1                                                                                     | 497                                                                                           | 193                                                                                                                                                | 39                                                                                                                                                                                                  | 38,8                                                                                                                                                                                                | 0,3                                                                                                                                                                                                      | 14                                                                                                                                                                                                                                                                                                                             | 0,8                                                                                                                                                                                                                                                                                                                                 | 3,1                                                                                                                                                                           |
| Region 52                         | 1                                                                                         | 111455                            | 105475                            | 94,6                                                                       | 94,6                                                                             | 0,9                                                                                   | 57                                                                                            | 0                                                                                                                                                  | 0                                                                                                                                                                                                   | 0,0                                                                                                                                                                                                 | 0                                                                                                                                                                                                        | 745399                                                                                                                                                                                                                                                                                                                         | 0                                                                                                                                                                                                                                                                                                                                   | 1,9                                                                                                                                                                           |
| Region 53                         | 0                                                                                         | 73825                             | 0                                 | 0                                                                          | 0,0                                                                              | 0                                                                                     | 63                                                                                            | 0                                                                                                                                                  | 0                                                                                                                                                                                                   | 0,0                                                                                                                                                                                                 | 0                                                                                                                                                                                                        | 15                                                                                                                                                                                                                                                                                                                             | 1                                                                                                                                                                                                                                                                                                                                   | 1                                                                                                                                                                             |
| Region 54                         | 1                                                                                         | 54864                             | 26376                             | 0,4                                                                        | 48,1                                                                             | 0,4                                                                                   | 0                                                                                             | 0                                                                                                                                                  | 0                                                                                                                                                                                                   | 0,0                                                                                                                                                                                                 | 0                                                                                                                                                                                                        | 1                                                                                                                                                                                                                                                                                                                              | 0                                                                                                                                                                                                                                                                                                                                   | 1,4                                                                                                                                                                           |
| Region 55                         | 0                                                                                         | 235636                            |                                   | 0                                                                          | 0,0                                                                              | 0                                                                                     | 0                                                                                             | 0                                                                                                                                                  | 0                                                                                                                                                                                                   | 0,0                                                                                                                                                                                                 | 0                                                                                                                                                                                                        | 1                                                                                                                                                                                                                                                                                                                              | 0                                                                                                                                                                                                                                                                                                                                   | 0                                                                                                                                                                             |
| Region 56                         | 0                                                                                         | 15751                             |                                   | 0                                                                          | 0,0                                                                              | 0                                                                                     | 0                                                                                             | 0                                                                                                                                                  | 0                                                                                                                                                                                                   | 0,0                                                                                                                                                                                                 | 0                                                                                                                                                                                                        | 29                                                                                                                                                                                                                                                                                                                             | 0                                                                                                                                                                                                                                                                                                                                   | 0                                                                                                                                                                             |
| Region 57                         | 0                                                                                         | 104440                            | 0                                 | 0                                                                          | 0,0                                                                              | 0                                                                                     | 116                                                                                           | 0                                                                                                                                                  | 0                                                                                                                                                                                                   | 0,0                                                                                                                                                                                                 | 0                                                                                                                                                                                                        | 15                                                                                                                                                                                                                                                                                                                             | 0                                                                                                                                                                                                                                                                                                                                   | 0                                                                                                                                                                             |
| Region 58                         | 0                                                                                         | 193449                            | 0                                 | 0                                                                          | 0,0                                                                              | 0                                                                                     | 2433                                                                                          | 0                                                                                                                                                  | 0                                                                                                                                                                                                   | 0,0                                                                                                                                                                                                 | 0                                                                                                                                                                                                        | 127                                                                                                                                                                                                                                                                                                                            | 0                                                                                                                                                                                                                                                                                                                                   | 0                                                                                                                                                                             |
| Region 59                         | 0                                                                                         | 113436                            | 0                                 | 0                                                                          | 0,0                                                                              | 0                                                                                     | 313                                                                                           | 0                                                                                                                                                  | 0                                                                                                                                                                                                   | 0,0                                                                                                                                                                                                 | 0                                                                                                                                                                                                        | 12                                                                                                                                                                                                                                                                                                                             | 0,8                                                                                                                                                                                                                                                                                                                                 | 0,8                                                                                                                                                                           |
| Region 60                         | 1                                                                                         | 62278                             | 11984                             | 0,1                                                                        | 19,2                                                                             | 0,1                                                                                   | 399                                                                                           | 67                                                                                                                                                 | 0,9                                                                                                                                                                                                 | 16,8                                                                                                                                                                                                | 0,1                                                                                                                                                                                                      | 43                                                                                                                                                                                                                                                                                                                             | 0                                                                                                                                                                                                                                                                                                                                   | 1,2                                                                                                                                                                           |
| Region 61                         | 1                                                                                         | 73721                             |                                   | 0                                                                          | 0,0                                                                              | 0                                                                                     | 0                                                                                             | 0                                                                                                                                                  | 0                                                                                                                                                                                                   | 0,0                                                                                                                                                                                                 | 0                                                                                                                                                                                                        | 1                                                                                                                                                                                                                                                                                                                              | 0                                                                                                                                                                                                                                                                                                                                   | 1                                                                                                                                                                             |
| Region 62                         |                                                                                           | 270785                            |                                   |                                                                            | 0,0                                                                              | 0                                                                                     | 5                                                                                             | 0                                                                                                                                                  |                                                                                                                                                                                                     | 0,0                                                                                                                                                                                                 | 0                                                                                                                                                                                                        |                                                                                                                                                                                                                                                                                                                                | 0                                                                                                                                                                                                                                                                                                                                   | 0                                                                                                                                                                             |

**Indicators of the regional rehabilitation systems development in Russia (2018)**

| Regions of the Russian Federation | Availability of an interagency information system (presence - 1 point, absence - 0 point) | Total number of PwD in the region | Total number of PwD in the region | Number of PwD, whose data are stored in the interagency information system | The share of PwD, whose data are stored in the interagency information system, % | The share of PwD, whose data are stored in the interagency information system, points | Number of organizations providing rehabilitation and (or) habilitation measures in the region | Number of organizations providing rehabilitation and (or) habilitation measures in the regions and connected to the interagency information system | The share of organizations providing rehabilitation and (or) habilitation measures in the regions and connected to the interagency information system in the total number of those organizations, % | The share of organizations providing rehabilitation and (or) habilitation measures in the regions and connected to the interagency information system in the total number of those organizations, % | The share of organizations providing rehabilitation and (or) habilitation measures in the regions and connected to the interagency information system in the total number of those organizations, points | The share of PwD who received measures that were written in the individual rehabilitation/habilitation programs and determined by the regional agencies in the total number of PWD who received the individual rehabilitation/habilitation programs in the bureaus of medical and social expertise in the assessment period, % | The share of PwD who received measures that were written in the individual rehabilitation/habilitation programs and determined by the regional agencies in the total number of PWD who received the individual rehabilitation/habilitation programs in the bureaus of medical and social expertise in the assessment period, points | The formation of the information base of the regional system, taking into account information about the needs of PwD in rehabilitation and (or) habilitation services, points |
|-----------------------------------|-------------------------------------------------------------------------------------------|-----------------------------------|-----------------------------------|----------------------------------------------------------------------------|----------------------------------------------------------------------------------|---------------------------------------------------------------------------------------|-----------------------------------------------------------------------------------------------|----------------------------------------------------------------------------------------------------------------------------------------------------|-----------------------------------------------------------------------------------------------------------------------------------------------------------------------------------------------------|-----------------------------------------------------------------------------------------------------------------------------------------------------------------------------------------------------|----------------------------------------------------------------------------------------------------------------------------------------------------------------------------------------------------------|--------------------------------------------------------------------------------------------------------------------------------------------------------------------------------------------------------------------------------------------------------------------------------------------------------------------------------|-------------------------------------------------------------------------------------------------------------------------------------------------------------------------------------------------------------------------------------------------------------------------------------------------------------------------------------|-------------------------------------------------------------------------------------------------------------------------------------------------------------------------------|
| Region 63                         | 0                                                                                         | 80941                             | 0                                 | 0                                                                          | 0,0                                                                              | 0                                                                                     | 94                                                                                            | 0                                                                                                                                                  | 0                                                                                                                                                                                                   | 0,0                                                                                                                                                                                                 | 0                                                                                                                                                                                                        | 51                                                                                                                                                                                                                                                                                                                             | 0                                                                                                                                                                                                                                                                                                                                   | 0                                                                                                                                                                             |
| Region 64                         | 0                                                                                         | 57557                             | 0                                 | 0                                                                          | 0,0                                                                              | 0                                                                                     | 38                                                                                            | 0                                                                                                                                                  | 0                                                                                                                                                                                                   | 0,0                                                                                                                                                                                                 | 0                                                                                                                                                                                                        | 4                                                                                                                                                                                                                                                                                                                              | 0,3                                                                                                                                                                                                                                                                                                                                 | 0,3                                                                                                                                                                           |
| Region 65                         | 1                                                                                         | 52219                             | 22780                             | 43,6                                                                       | 43,6                                                                             | 0,4                                                                                   | 190                                                                                           | 56                                                                                                                                                 | 100                                                                                                                                                                                                 | 29,5                                                                                                                                                                                                | 0,2                                                                                                                                                                                                      | 116991                                                                                                                                                                                                                                                                                                                         | 0                                                                                                                                                                                                                                                                                                                                   | 1,6                                                                                                                                                                           |
| Region 66                         |                                                                                           | 306                               |                                   |                                                                            | 0,0                                                                              | 0                                                                                     |                                                                                               | 0                                                                                                                                                  |                                                                                                                                                                                                     | 0,0                                                                                                                                                                                                 | 0                                                                                                                                                                                                        |                                                                                                                                                                                                                                                                                                                                | 0                                                                                                                                                                                                                                                                                                                                   | 0                                                                                                                                                                             |
| Region 67                         | 0                                                                                         | 0                                 | 0                                 | 0                                                                          | 0,0                                                                              | 0                                                                                     | 36                                                                                            | 0                                                                                                                                                  | 0                                                                                                                                                                                                   | 0,0                                                                                                                                                                                                 | 0                                                                                                                                                                                                        | 10                                                                                                                                                                                                                                                                                                                             | 0,5                                                                                                                                                                                                                                                                                                                                 | 0,5                                                                                                                                                                           |
| Region 68                         | 1                                                                                         | 222043                            | 113516                            | 51                                                                         | 51,1                                                                             | 0,5                                                                                   | 9                                                                                             | 6                                                                                                                                                  | 67                                                                                                                                                                                                  | 66,7                                                                                                                                                                                                | 0,6                                                                                                                                                                                                      | 15                                                                                                                                                                                                                                                                                                                             | 1                                                                                                                                                                                                                                                                                                                                   | 3,1                                                                                                                                                                           |
| Region 69                         |                                                                                           | 136622                            |                                   |                                                                            | 0,0                                                                              | 0                                                                                     | 0                                                                                             | 0                                                                                                                                                  |                                                                                                                                                                                                     | 0,0                                                                                                                                                                                                 | 0                                                                                                                                                                                                        |                                                                                                                                                                                                                                                                                                                                | 0                                                                                                                                                                                                                                                                                                                                   | 0                                                                                                                                                                             |
| Region 70                         | 0                                                                                         | 60110                             | 0                                 | 0                                                                          | 0,0                                                                              | 0                                                                                     | 286                                                                                           | 0                                                                                                                                                  | 0                                                                                                                                                                                                   | 0,0                                                                                                                                                                                                 | 0                                                                                                                                                                                                        | 15/0,8                                                                                                                                                                                                                                                                                                                         | 0                                                                                                                                                                                                                                                                                                                                   | 0                                                                                                                                                                             |
| Region 71                         | 0                                                                                         | 74555                             | 0                                 | 0                                                                          | 0,0                                                                              | 0                                                                                     | 75                                                                                            | 0                                                                                                                                                  | 0                                                                                                                                                                                                   | 0,0                                                                                                                                                                                                 | 0                                                                                                                                                                                                        | 18                                                                                                                                                                                                                                                                                                                             | 0                                                                                                                                                                                                                                                                                                                                   | 0                                                                                                                                                                             |
| Region 72                         | 0                                                                                         | 48405                             | 0                                 | 0                                                                          | 0,0                                                                              | 0                                                                                     | 35                                                                                            | 0                                                                                                                                                  | 0                                                                                                                                                                                                   | 0,0                                                                                                                                                                                                 | 0                                                                                                                                                                                                        | 1                                                                                                                                                                                                                                                                                                                              | 0                                                                                                                                                                                                                                                                                                                                   | 0                                                                                                                                                                             |
| Region 73                         | 0                                                                                         | 51769                             |                                   | 0                                                                          | 0,0                                                                              | 0                                                                                     | 0                                                                                             | 0                                                                                                                                                  | 0                                                                                                                                                                                                   | 0,0                                                                                                                                                                                                 | 0                                                                                                                                                                                                        | 1                                                                                                                                                                                                                                                                                                                              | 0                                                                                                                                                                                                                                                                                                                                   | 0                                                                                                                                                                             |
| Region 74                         | -                                                                                         | 13260                             |                                   |                                                                            | 0,0                                                                              | 0                                                                                     | 0                                                                                             | 0                                                                                                                                                  |                                                                                                                                                                                                     | 0,0                                                                                                                                                                                                 | 0                                                                                                                                                                                                        |                                                                                                                                                                                                                                                                                                                                | 0                                                                                                                                                                                                                                                                                                                                   | 0                                                                                                                                                                             |
| Region 75                         | 1                                                                                         | 78293                             |                                   | 0,9                                                                        | 0,0                                                                              | 0                                                                                     | 0                                                                                             | 0                                                                                                                                                  | 0,9                                                                                                                                                                                                 | 0,0                                                                                                                                                                                                 | 0                                                                                                                                                                                                        | 1                                                                                                                                                                                                                                                                                                                              | 0                                                                                                                                                                                                                                                                                                                                   | 1                                                                                                                                                                             |
| Region 76                         | 0                                                                                         | 35096                             | 0                                 | 0                                                                          | 0,0                                                                              | 0                                                                                     | 6                                                                                             | 0                                                                                                                                                  | 0                                                                                                                                                                                                   | 0,0                                                                                                                                                                                                 | 0                                                                                                                                                                                                        | 15                                                                                                                                                                                                                                                                                                                             | 1                                                                                                                                                                                                                                                                                                                                   | 1                                                                                                                                                                             |
| Region 77                         |                                                                                           |                                   |                                   |                                                                            | 0,0                                                                              | 0                                                                                     | 0                                                                                             | 0                                                                                                                                                  |                                                                                                                                                                                                     | 0,0                                                                                                                                                                                                 | 0                                                                                                                                                                                                        |                                                                                                                                                                                                                                                                                                                                | 0                                                                                                                                                                                                                                                                                                                                   | 0                                                                                                                                                                             |
| Region 78                         | 0                                                                                         | 27803                             |                                   | 0                                                                          | 0,0                                                                              | 0                                                                                     | 0                                                                                             | 0                                                                                                                                                  | 0                                                                                                                                                                                                   | 0,0                                                                                                                                                                                                 | 0                                                                                                                                                                                                        | 0,5                                                                                                                                                                                                                                                                                                                            | 0                                                                                                                                                                                                                                                                                                                                   | 0                                                                                                                                                                             |
| Region 79                         | 1                                                                                         | 139972                            |                                   | 0,3                                                                        | 0,0                                                                              | 0                                                                                     | 0                                                                                             | 0                                                                                                                                                  | 0,7                                                                                                                                                                                                 | 0,0                                                                                                                                                                                                 | 0                                                                                                                                                                                                        | 0,5                                                                                                                                                                                                                                                                                                                            | 0                                                                                                                                                                                                                                                                                                                                   | 1                                                                                                                                                                             |
| Region 80                         | 0                                                                                         | 5492                              | 0                                 | 0                                                                          | 0,0                                                                              | 0                                                                                     | 54                                                                                            | 0                                                                                                                                                  | 0                                                                                                                                                                                                   | 0,0                                                                                                                                                                                                 | 0                                                                                                                                                                                                        | 1                                                                                                                                                                                                                                                                                                                              | 0                                                                                                                                                                                                                                                                                                                                   | 0                                                                                                                                                                             |
| Region 81                         |                                                                                           | 110200                            |                                   |                                                                            | 0,0                                                                              | 0                                                                                     | 0                                                                                             | 0                                                                                                                                                  |                                                                                                                                                                                                     | 0,0                                                                                                                                                                                                 | 0                                                                                                                                                                                                        |                                                                                                                                                                                                                                                                                                                                | 0                                                                                                                                                                                                                                                                                                                                   | 0                                                                                                                                                                             |
| Region 82                         | 0                                                                                         |                                   |                                   | 0                                                                          | 0,0                                                                              | 0                                                                                     | 0                                                                                             | 0                                                                                                                                                  | 0                                                                                                                                                                                                   | 0,0                                                                                                                                                                                                 | 0                                                                                                                                                                                                        | 1                                                                                                                                                                                                                                                                                                                              | 0                                                                                                                                                                                                                                                                                                                                   | 0                                                                                                                                                                             |
| Region 83                         | 1                                                                                         | 202198                            | 0                                 | 0                                                                          | 0,0                                                                              | 0                                                                                     | 354                                                                                           | 0                                                                                                                                                  | 0                                                                                                                                                                                                   | 0,0                                                                                                                                                                                                 | 0                                                                                                                                                                                                        | 1                                                                                                                                                                                                                                                                                                                              | 0                                                                                                                                                                                                                                                                                                                                   | 1                                                                                                                                                                             |
| Region 84                         | 1                                                                                         | 122700                            | 18212                             | 14,83                                                                      | 14,8                                                                             | 0,1                                                                                   | 0                                                                                             | 0                                                                                                                                                  | 83,3                                                                                                                                                                                                | 0,0                                                                                                                                                                                                 | 0                                                                                                                                                                                                        | 1                                                                                                                                                                                                                                                                                                                              | 0                                                                                                                                                                                                                                                                                                                                   | 1,1                                                                                                                                                                           |
| Region 85                         |                                                                                           | 229898                            |                                   |                                                                            | 0,0                                                                              | 0                                                                                     | 0                                                                                             | 0                                                                                                                                                  |                                                                                                                                                                                                     | 0,0                                                                                                                                                                                                 | 0                                                                                                                                                                                                        | 14                                                                                                                                                                                                                                                                                                                             | 0,8                                                                                                                                                                                                                                                                                                                                 | 0,8                                                                                                                                                                           |

### Indicators of the regional rehabilitation systems development in Russia (2018)

| Regions of the Russian Federation | The formation of an integrated approach to the organization of the regional system in the region, points | The satisfaction of PwD (their legal representatives) with rehabilitation or habilitation measures (services), points | The staffing of organizations providing rehabilitation and (or) habilitation services with specialists of the appropriate profile based on the needs of PwD in rehabilitation and (or) habilitation services | The formation of the information base of the regional system, taking into account information about the needs of PwD in rehabilitation and (or) habilitation services, points | The final point score of the regional rehabilitation system, points |
|-----------------------------------|----------------------------------------------------------------------------------------------------------|-----------------------------------------------------------------------------------------------------------------------|--------------------------------------------------------------------------------------------------------------------------------------------------------------------------------------------------------------|-------------------------------------------------------------------------------------------------------------------------------------------------------------------------------|---------------------------------------------------------------------|
| Region 1                          | 3                                                                                                        | 1,6                                                                                                                   | 1,3                                                                                                                                                                                                          | 0                                                                                                                                                                             | 5,9                                                                 |
| Region 2                          | 3,2                                                                                                      | 0                                                                                                                     | 0                                                                                                                                                                                                            | 0                                                                                                                                                                             | 3,2                                                                 |
| Region 3                          | 2                                                                                                        | 1,6                                                                                                                   | 0,2                                                                                                                                                                                                          | 0,5                                                                                                                                                                           | 4,3                                                                 |
| Region 4                          | 2,2                                                                                                      | 1,3                                                                                                                   | 0,3                                                                                                                                                                                                          | 0                                                                                                                                                                             | 3,8                                                                 |
| Region 5                          | 4,6                                                                                                      | 0                                                                                                                     | 0,7                                                                                                                                                                                                          | 3                                                                                                                                                                             | 8,3                                                                 |
| Region 6                          | 4,3                                                                                                      | 1,2                                                                                                                   | 1,3                                                                                                                                                                                                          | 2,6                                                                                                                                                                           | 9,4                                                                 |
| Region 7                          | 3,3                                                                                                      | 1,7                                                                                                                   | 1                                                                                                                                                                                                            | 3,1                                                                                                                                                                           | 9,1                                                                 |
| Region 8                          | 3,2                                                                                                      | 1,6                                                                                                                   | 0,5                                                                                                                                                                                                          | 1                                                                                                                                                                             | 6,3                                                                 |
| Region 9                          | 3,9                                                                                                      | 1,6                                                                                                                   | 1                                                                                                                                                                                                            | 0,1                                                                                                                                                                           | 6,6                                                                 |
| Region 10                         | 4,5                                                                                                      | 0,8                                                                                                                   | 0,7                                                                                                                                                                                                          | 2                                                                                                                                                                             | 8                                                                   |
| Region 11                         | 4                                                                                                        | 0,8                                                                                                                   | 0,6                                                                                                                                                                                                          | 0                                                                                                                                                                             | 5,4                                                                 |
| Region 12                         | 2                                                                                                        | 0,8                                                                                                                   | 1,7                                                                                                                                                                                                          | 0                                                                                                                                                                             | 4,5                                                                 |
| Region 13                         | 4                                                                                                        | 1,8                                                                                                                   | 0,2                                                                                                                                                                                                          | 1,5                                                                                                                                                                           | 7,5                                                                 |
| Region 14                         | 4,3                                                                                                      | 1,8                                                                                                                   | 1,7                                                                                                                                                                                                          | 0,3                                                                                                                                                                           | 8,1                                                                 |
| Region 15                         | 2,7                                                                                                      | 1,7                                                                                                                   | 1,1                                                                                                                                                                                                          | 3,1                                                                                                                                                                           | 8,6                                                                 |
| Region 16                         | 3,7                                                                                                      | 0                                                                                                                     | 0                                                                                                                                                                                                            | 1                                                                                                                                                                             | 4,7                                                                 |

### Indicators of the regional rehabilitation systems development in Russia (2018)

| Regions of the Russian Federation | The formation of an integrated approach to the organization of the regional system in the region, points | The satisfaction of PwD (their legal representatives) with rehabilitation or habilitation measures (services), points | The staffing of organizations providing rehabilitation and (or) habilitation services with specialists of the appropriate profile based on the needs of PwD in rehabilitation and (or) habilitation services | The formation of the information base of the regional system, taking into account information about the needs of PwD in rehabilitation and (or) habilitation services, points | The final point score of the regional rehabilitation system, points |
|-----------------------------------|----------------------------------------------------------------------------------------------------------|-----------------------------------------------------------------------------------------------------------------------|--------------------------------------------------------------------------------------------------------------------------------------------------------------------------------------------------------------|-------------------------------------------------------------------------------------------------------------------------------------------------------------------------------|---------------------------------------------------------------------|
| Region 17                         | 2,7                                                                                                      | 1,8                                                                                                                   | 1,8                                                                                                                                                                                                          | 0,9                                                                                                                                                                           | 7,2                                                                 |
| Region 18                         | 4                                                                                                        | 1,8                                                                                                                   | 0,6                                                                                                                                                                                                          | 1,9                                                                                                                                                                           | 8,3                                                                 |
| Region 19                         | 3,2                                                                                                      | 1,6                                                                                                                   | 0,4                                                                                                                                                                                                          | 0                                                                                                                                                                             | 5,2                                                                 |
| Region 20                         | 3,2                                                                                                      | 1,8                                                                                                                   | 1,3                                                                                                                                                                                                          | 3                                                                                                                                                                             | 9,3                                                                 |
| Region 21                         | 4,9                                                                                                      | 1,6                                                                                                                   | 1                                                                                                                                                                                                            | 2,3                                                                                                                                                                           | 9,8                                                                 |
| Region 22                         | 4,3                                                                                                      | 1,4                                                                                                                   | 0                                                                                                                                                                                                            | 2,8                                                                                                                                                                           | 8,5                                                                 |
| Region 23                         | 4,6                                                                                                      | 1,2                                                                                                                   | 1,1                                                                                                                                                                                                          | 0                                                                                                                                                                             | 6,9                                                                 |
| Region 24                         | 0,5                                                                                                      | 0                                                                                                                     | 0                                                                                                                                                                                                            | 0                                                                                                                                                                             | 0,5                                                                 |
| Region 25                         | 4,6                                                                                                      | 0,9                                                                                                                   | 0,9                                                                                                                                                                                                          | 0                                                                                                                                                                             | 6,4                                                                 |
| Region 26                         | 3                                                                                                        | 1,8                                                                                                                   | 1,8                                                                                                                                                                                                          | 0                                                                                                                                                                             | 6,6                                                                 |
| Region 27                         | 3,2                                                                                                      | 0                                                                                                                     | 0                                                                                                                                                                                                            | 1                                                                                                                                                                             | 4,2                                                                 |
| Region 28                         | 4,3                                                                                                      | 1,7                                                                                                                   | 0,5                                                                                                                                                                                                          | 1,3                                                                                                                                                                           | 7,8                                                                 |
| Region 29                         | 3,8                                                                                                      | 0                                                                                                                     | 1                                                                                                                                                                                                            | 0                                                                                                                                                                             | 4,8                                                                 |
| Region 30                         | 4,2                                                                                                      | 1                                                                                                                     | 0,8                                                                                                                                                                                                          | 0                                                                                                                                                                             | 6                                                                   |
| Region 31                         | 3,7                                                                                                      | 2                                                                                                                     | 1,8                                                                                                                                                                                                          | 0                                                                                                                                                                             | 7,5                                                                 |
| Region 32                         | 0,5                                                                                                      | 0                                                                                                                     | 0                                                                                                                                                                                                            | 0                                                                                                                                                                             | 0,5                                                                 |

### Indicators of the regional rehabilitation systems development in Russia (2018)

| Regions of the Russian Federation | The formation of an integrated approach to the organization of the regional system in the region, points | The satisfaction of PwD (their legal representatives) with rehabilitation or habilitation measures (services), points | The staffing of organizations providing rehabilitation and (or) habilitation services with specialists of the appropriate profile based on the needs of PwD in rehabilitation and (or) habilitation services | The formation of the information base of the regional system, taking into account information about the needs of PwD in rehabilitation and (or) habilitation services, points | The final point score of the regional rehabilitation system, points |
|-----------------------------------|----------------------------------------------------------------------------------------------------------|-----------------------------------------------------------------------------------------------------------------------|--------------------------------------------------------------------------------------------------------------------------------------------------------------------------------------------------------------|-------------------------------------------------------------------------------------------------------------------------------------------------------------------------------|---------------------------------------------------------------------|
| Region 33                         | 4,4                                                                                                      | 1,7                                                                                                                   | 1,7                                                                                                                                                                                                          | 2,3                                                                                                                                                                           | 10,1                                                                |
| Region 34                         | 2,9                                                                                                      | 1,1                                                                                                                   | 2                                                                                                                                                                                                            | 2,7                                                                                                                                                                           | 8,7                                                                 |
| Region 35                         | 4,3                                                                                                      | 1,9                                                                                                                   | 0,8                                                                                                                                                                                                          | 1                                                                                                                                                                             | 8                                                                   |
| Region 36                         | 4                                                                                                        | 0,9                                                                                                                   | 0,6                                                                                                                                                                                                          | 0                                                                                                                                                                             | 5,5                                                                 |
| Region 37                         | 3,2                                                                                                      | 1,5                                                                                                                   | 1,1                                                                                                                                                                                                          | 1                                                                                                                                                                             | 6,8                                                                 |
| Region 38                         | 1,7                                                                                                      | 1,8                                                                                                                   | 1,1                                                                                                                                                                                                          | 0                                                                                                                                                                             | 4,6                                                                 |
| Region 39                         | 3,1                                                                                                      | 1                                                                                                                     | 0,5                                                                                                                                                                                                          | 1,2                                                                                                                                                                           | 5,8                                                                 |
| Region 40                         | 4,5                                                                                                      | 1,8                                                                                                                   | 0,9                                                                                                                                                                                                          | 2                                                                                                                                                                             | 9,2                                                                 |
| Region 41                         | 3,5                                                                                                      | 1,7                                                                                                                   | 1,3                                                                                                                                                                                                          | 3,5                                                                                                                                                                           | 10                                                                  |
| Region 42                         | 0,5                                                                                                      | 0                                                                                                                     | 0                                                                                                                                                                                                            | 0                                                                                                                                                                             | 0,5                                                                 |
| Region 43                         | 1,5                                                                                                      | 0                                                                                                                     | 0,8                                                                                                                                                                                                          | 0,8                                                                                                                                                                           | 3,1                                                                 |
| Region 44                         | 3,2                                                                                                      | 1,8                                                                                                                   | 1,3                                                                                                                                                                                                          | 0,8                                                                                                                                                                           | 7,1                                                                 |
| Region 45                         | 4                                                                                                        | 1,8                                                                                                                   | 1,3                                                                                                                                                                                                          | 0                                                                                                                                                                             | 7,1                                                                 |
| Region 46                         | 3,5                                                                                                      | 1,1                                                                                                                   | 1,5                                                                                                                                                                                                          | 1                                                                                                                                                                             | 7,1                                                                 |
| Region 47                         | 2,3                                                                                                      | 1,8                                                                                                                   | 1,8                                                                                                                                                                                                          | 2,2                                                                                                                                                                           | 8,1                                                                 |
| Region 48                         | 4,9                                                                                                      | 1,8                                                                                                                   | 1,3                                                                                                                                                                                                          | 3,1                                                                                                                                                                           | 11,1                                                                |

### Indicators of the regional rehabilitation systems development in Russia (2018)

| Regions of the Russian Federation | The formation of an integrated approach to the organization of the regional system in the region, points | The satisfaction of PwD (their legal representatives) with rehabilitation or habilitation measures (services), points | The staffing of organizations providing rehabilitation and (or) habilitation services with specialists of the appropriate profile based on the needs of PwD in rehabilitation and (or) habilitation services | The formation of the information base of the regional system, taking into account information about the needs of PwD in rehabilitation and (or) habilitation services, points | The final point score of the regional rehabilitation system, points |
|-----------------------------------|----------------------------------------------------------------------------------------------------------|-----------------------------------------------------------------------------------------------------------------------|--------------------------------------------------------------------------------------------------------------------------------------------------------------------------------------------------------------|-------------------------------------------------------------------------------------------------------------------------------------------------------------------------------|---------------------------------------------------------------------|
| Region 49                         | 2,4                                                                                                      | 1,8                                                                                                                   | 2                                                                                                                                                                                                            | 0                                                                                                                                                                             | 6,2                                                                 |
| Region 50                         | 3,5                                                                                                      | 1,8                                                                                                                   | 1,3                                                                                                                                                                                                          | 1                                                                                                                                                                             | 7,6                                                                 |
| Region 51                         | 4,6                                                                                                      | 1,4                                                                                                                   | 1,8                                                                                                                                                                                                          | 3,1                                                                                                                                                                           | 10,9                                                                |
| Region 52                         | 4,3                                                                                                      | 1,6                                                                                                                   | 2                                                                                                                                                                                                            | 1,9                                                                                                                                                                           | 9,8                                                                 |
| Region 53                         | 2,9                                                                                                      | 2                                                                                                                     | 0,6                                                                                                                                                                                                          | 1                                                                                                                                                                             | 6,5                                                                 |
| Region 54                         | 3,5                                                                                                      | 0                                                                                                                     | 1,2                                                                                                                                                                                                          | 1,4                                                                                                                                                                           | 6,1                                                                 |
| Region 55                         | 4,4                                                                                                      | 1,8                                                                                                                   | 1,5                                                                                                                                                                                                          | 0                                                                                                                                                                             | 7,7                                                                 |
| Region 56                         | 3,5                                                                                                      | 0                                                                                                                     | 1,8                                                                                                                                                                                                          | 0                                                                                                                                                                             | 5,3                                                                 |
| Region 57                         | 4,4                                                                                                      | 1                                                                                                                     | 1,8                                                                                                                                                                                                          | 0                                                                                                                                                                             | 7,2                                                                 |
| Region 58                         | 4,9                                                                                                      | 1,6                                                                                                                   | 1,5                                                                                                                                                                                                          | 0                                                                                                                                                                             | 8                                                                   |
| Region 59                         | 4                                                                                                        | 1,8                                                                                                                   | 1,7                                                                                                                                                                                                          | 0,8                                                                                                                                                                           | 8,3                                                                 |
| Region 60                         | 3,7                                                                                                      | 1,5                                                                                                                   | 0,5                                                                                                                                                                                                          | 1,2                                                                                                                                                                           | 6,9                                                                 |
| Region 61                         | 3                                                                                                        | 0                                                                                                                     | 0                                                                                                                                                                                                            | 1                                                                                                                                                                             | 4                                                                   |
| Region 62                         | 0,5                                                                                                      | 0                                                                                                                     | 0                                                                                                                                                                                                            | 0                                                                                                                                                                             | 0,5                                                                 |
| Region 63                         | 4,6                                                                                                      | 0,4                                                                                                                   | 1,7                                                                                                                                                                                                          | 0                                                                                                                                                                             | 6,7                                                                 |
| Region 64                         | 0,5                                                                                                      | 0,1                                                                                                                   | 0                                                                                                                                                                                                            | 0,3                                                                                                                                                                           | 0,9                                                                 |

### Indicators of the regional rehabilitation systems development in Russia (2018)

| Regions of the Russian Federation | The formation of an integrated approach to the organization of the regional system in the region, points | The satisfaction of PwD (their legal representatives) with rehabilitation or habilitation measures (services), points | The staffing of organizations providing rehabilitation and (or) habilitation services with specialists of the appropriate profile based on the needs of PwD in rehabilitation and (or) habilitation services | The formation of the information base of the regional system, taking into account information about the needs of PwD in rehabilitation and (or) habilitation services, points | The final point score of the regional rehabilitation system, points |
|-----------------------------------|----------------------------------------------------------------------------------------------------------|-----------------------------------------------------------------------------------------------------------------------|--------------------------------------------------------------------------------------------------------------------------------------------------------------------------------------------------------------|-------------------------------------------------------------------------------------------------------------------------------------------------------------------------------|---------------------------------------------------------------------|
| Region 65                         | 3,7                                                                                                      | 1,9                                                                                                                   | 0,9                                                                                                                                                                                                          | 1,6                                                                                                                                                                           | 8,1                                                                 |
| Region 66                         | 0,5                                                                                                      | 1,5                                                                                                                   | 0                                                                                                                                                                                                            | 0                                                                                                                                                                             | 2                                                                   |
| Region 67                         | 1,5                                                                                                      | 1,8                                                                                                                   | 0                                                                                                                                                                                                            | 0,5                                                                                                                                                                           | 3,8                                                                 |
| Region 68                         | 5                                                                                                        | 0                                                                                                                     | 0,5                                                                                                                                                                                                          | 3,1                                                                                                                                                                           | 8,6                                                                 |
| Region 69                         | 0,5                                                                                                      | 0,7                                                                                                                   | 0                                                                                                                                                                                                            | 0                                                                                                                                                                             | 1,2                                                                 |
| Region 70                         | 3,8                                                                                                      | 1,4                                                                                                                   | 0,1                                                                                                                                                                                                          | 0                                                                                                                                                                             | 5,3                                                                 |
| Region 71                         | 3                                                                                                        | 1,6                                                                                                                   | 0,7                                                                                                                                                                                                          | 0                                                                                                                                                                             | 5,3                                                                 |
| Region 72                         | 4                                                                                                        | 0                                                                                                                     | 1                                                                                                                                                                                                            | 0                                                                                                                                                                             | 5                                                                   |
| Region 73                         | 2,8                                                                                                      | 0                                                                                                                     | 0                                                                                                                                                                                                            | 0                                                                                                                                                                             | 2,8                                                                 |
| Region 74                         | 0,5                                                                                                      | 0                                                                                                                     | 0                                                                                                                                                                                                            | 0                                                                                                                                                                             | 0,5                                                                 |
| Region 75                         | 3,6                                                                                                      | 1,3                                                                                                                   | 0                                                                                                                                                                                                            | 1                                                                                                                                                                             | 5,9                                                                 |
| Region 76                         | 3                                                                                                        | 0                                                                                                                     | 0,3                                                                                                                                                                                                          | 1                                                                                                                                                                             | 4,3                                                                 |
| Region 77                         | 0,5                                                                                                      | 0                                                                                                                     | 0                                                                                                                                                                                                            | 0                                                                                                                                                                             | 0,5                                                                 |
| Region 78                         | 1,2                                                                                                      | 0                                                                                                                     | 0                                                                                                                                                                                                            | 0                                                                                                                                                                             | 1,2                                                                 |
| Region 79                         | 2,5                                                                                                      | 1,8                                                                                                                   | 0                                                                                                                                                                                                            | 1                                                                                                                                                                             | 5,3                                                                 |
| Region 80                         | 5                                                                                                        | 0                                                                                                                     | 1,3                                                                                                                                                                                                          | 0                                                                                                                                                                             | 6,3                                                                 |

### Indicators of the regional rehabilitation systems development in Russia (2018)

| Regions of the Russian Federation | The formation of an integrated approach to the organization of the regional system in the region, points | The satisfaction of PwD (their legal representatives) with rehabilitation or habilitation measures (services), points | The staffing of organizations providing rehabilitation and (or) habilitation services with specialists of the appropriate profile based on the needs of PwD in rehabilitation and (or) habilitation services | The formation of the information base of the regional system, taking into account information about the needs of PwD in rehabilitation and (or) habilitation services, points | The final point score of the regional rehabilitation system, points |
|-----------------------------------|----------------------------------------------------------------------------------------------------------|-----------------------------------------------------------------------------------------------------------------------|--------------------------------------------------------------------------------------------------------------------------------------------------------------------------------------------------------------|-------------------------------------------------------------------------------------------------------------------------------------------------------------------------------|---------------------------------------------------------------------|
| Region 81                         | 0,5                                                                                                      | 0                                                                                                                     | 0                                                                                                                                                                                                            | 0                                                                                                                                                                             | 0,5                                                                 |
| Region 82                         | 2,9                                                                                                      | 1,6                                                                                                                   | 0                                                                                                                                                                                                            | 0                                                                                                                                                                             | 4,5                                                                 |
| Region 83                         | 4,5                                                                                                      | 0                                                                                                                     | 0,9                                                                                                                                                                                                          | 1                                                                                                                                                                             | 6,4                                                                 |
| Region 84                         | 3,7                                                                                                      | 1,7                                                                                                                   | 0,5                                                                                                                                                                                                          | 1,1                                                                                                                                                                           | 7                                                                   |
| Region 85                         | 0,5                                                                                                      | 0                                                                                                                     | 0,8                                                                                                                                                                                                          | 0,8                                                                                                                                                                           | 2,1                                                                 |
