# Supplementary material for: Capabilities Approach Application in the Development of Regional Rehabilitation Systems in Russia
Source: MDPI journal article supplement (doi:10.3390/soc12060166), 2022-11-19
Supplement: s1 [file s1 › Indicators of the regional rehabilitation systems development in Russia (2019) (3).pdf]

**Table S2: Indicators of the regional rehabilitation systems development in Russia (2019)**

| Regions of the Russian Federation | Number of organizations providing rehabilitation and (or) habilitation services and included in the regional system regarding to the formation an integrated approach to its arrangement | Total number of organizations providing rehabilitation and (or) habilitation services and located in the region | The share of organizations providing rehabilitation and (or) habilitation services and included in the regional system regarding to the formation an integrated approach to its arrangement in the total number of organizations providing rehabilitation and (or) habilitation services and located in the region, % | The share of organizations providing rehabilitation and (or) habilitation services and included in the regional system regarding to the formation an integrated approach to its arrangement in the total number of organizations providing rehabilitation and (or) habilitation services and located in the region, points | Number of regional agencies in various fields of activities (healthcare, education, social protection, physical culture and sports, culture, labor and employment, information and communication) involved in the formation of an integrated approach to the arrangement of the regional system | Number of regional agencies in various fields of activity (healthcare, education, social protection, physical culture and sports, culture, labor and employment, information and communication) involved in the formation of an integrated approach to the arrangement of the regional system, points | Availability of the legal and methodological base of the regional system for forming an integrated approach to its arrangement, agreements on interaction between providers of rehabilitation and (or) habilitation measures (presence – 1 point, absence – 0 point) | Funding allocated for rehabilitation and habilitation measures to meet the needs of the disabled in the assessment period, million rubles | Funding allocated for rehabilitation and habilitation measures to meet the needs of PwD in the previous period, million rubles | The share of changes in funding allocated for rehabilitation and habilitation measures to meet the needs of PwD in comparison with the previous period | The share of changes in funding allocated for rehabilitation and habilitation measures to meet the needs of PwD in comparison with the previous period, points | Availability of the feasible regional recommendations on options for the provision of rehabilitation and habilitation measures for PwD (plan approved by agencies, certificates, co-financing, and others) (presence - 1 point, absence - 0 point) | The formation of an integrated approach to the organization of the regional system in the region, points |
|-----------------------------------|------------------------------------------------------------------------------------------------------------------------------------------------------------------------------------------|-----------------------------------------------------------------------------------------------------------------|-----------------------------------------------------------------------------------------------------------------------------------------------------------------------------------------------------------------------------------------------------------------------------------------------------------------------|----------------------------------------------------------------------------------------------------------------------------------------------------------------------------------------------------------------------------------------------------------------------------------------------------------------------------|-------------------------------------------------------------------------------------------------------------------------------------------------------------------------------------------------------------------------------------------------------------------------------------------------|-------------------------------------------------------------------------------------------------------------------------------------------------------------------------------------------------------------------------------------------------------------------------------------------------------|----------------------------------------------------------------------------------------------------------------------------------------------------------------------------------------------------------------------------------------------------------------------|-------------------------------------------------------------------------------------------------------------------------------------------|--------------------------------------------------------------------------------------------------------------------------------|--------------------------------------------------------------------------------------------------------------------------------------------------------|----------------------------------------------------------------------------------------------------------------------------------------------------------------|----------------------------------------------------------------------------------------------------------------------------------------------------------------------------------------------------------------------------------------------------|----------------------------------------------------------------------------------------------------------|
| Region 1                          | 0                                                                                                                                                                                        | 263                                                                                                             | 0,0                                                                                                                                                                                                                                                                                                                   | 0,0                                                                                                                                                                                                                                                                                                                        | 1                                                                                                                                                                                                                                                                                               | 1                                                                                                                                                                                                                                                                                                     | 1                                                                                                                                                                                                                                                                    | 252,4                                                                                                                                     | 214,7                                                                                                                          | 1                                                                                                                                                      | 1                                                                                                                                                              | 0                                                                                                                                                                                                                                                  | 3,0                                                                                                      |
| Region 2                          | 3                                                                                                                                                                                        | 55                                                                                                              | 5,5                                                                                                                                                                                                                                                                                                                   | 0,0                                                                                                                                                                                                                                                                                                                        | 1                                                                                                                                                                                                                                                                                               | 1                                                                                                                                                                                                                                                                                                     | 1                                                                                                                                                                                                                                                                    | 33,5                                                                                                                                      | 49,8                                                                                                                           | 0                                                                                                                                                      | 0                                                                                                                                                              | 0                                                                                                                                                                                                                                                  | 2,0                                                                                                      |
| Region 3                          | 67                                                                                                                                                                                       | 67                                                                                                              | 100,0                                                                                                                                                                                                                                                                                                                 | 1,0                                                                                                                                                                                                                                                                                                                        | 5                                                                                                                                                                                                                                                                                               | 0,7                                                                                                                                                                                                                                                                                                   | 1                                                                                                                                                                                                                                                                    | 158,7                                                                                                                                     | 158,7                                                                                                                          | 0,5                                                                                                                                                    | 0,5                                                                                                                                                            | 1                                                                                                                                                                                                                                                  | 4,2                                                                                                      |
| Region 4                          | 35                                                                                                                                                                                       | 35                                                                                                              | 100,0                                                                                                                                                                                                                                                                                                                 | 1,0                                                                                                                                                                                                                                                                                                                        | 1                                                                                                                                                                                                                                                                                               | 1                                                                                                                                                                                                                                                                                                     | 1                                                                                                                                                                                                                                                                    | 105,084                                                                                                                                   | 194,25                                                                                                                         | 0,8                                                                                                                                                    | 0                                                                                                                                                              | 1                                                                                                                                                                                                                                                  | 4,0                                                                                                      |
| Region 5                          | 0                                                                                                                                                                                        | 656                                                                                                             | 0,0                                                                                                                                                                                                                                                                                                                   | 0,0                                                                                                                                                                                                                                                                                                                        | 1                                                                                                                                                                                                                                                                                               | 1                                                                                                                                                                                                                                                                                                     | 1                                                                                                                                                                                                                                                                    | 24,11                                                                                                                                     | 27,49                                                                                                                          | -0,12                                                                                                                                                  | 0                                                                                                                                                              | 0                                                                                                                                                                                                                                                  | 2,0                                                                                                      |
| Region 6                          | 42                                                                                                                                                                                       | 97                                                                                                              | 43,3                                                                                                                                                                                                                                                                                                                  | 0,4                                                                                                                                                                                                                                                                                                                        | 5                                                                                                                                                                                                                                                                                               | 0,7                                                                                                                                                                                                                                                                                                   | 1                                                                                                                                                                                                                                                                    | 38,56                                                                                                                                     | 6,75                                                                                                                           | 1                                                                                                                                                      | 1                                                                                                                                                              | 1                                                                                                                                                                                                                                                  | 4,1                                                                                                      |
| Region 7                          | 391                                                                                                                                                                                      | 725                                                                                                             | 53,9                                                                                                                                                                                                                                                                                                                  | 0,5                                                                                                                                                                                                                                                                                                                        | 1                                                                                                                                                                                                                                                                                               | 1                                                                                                                                                                                                                                                                                                     | 1                                                                                                                                                                                                                                                                    | 24,9                                                                                                                                      | 10                                                                                                                             | 1                                                                                                                                                      | 1                                                                                                                                                              | 1                                                                                                                                                                                                                                                  | 4,5                                                                                                      |
| Region 8                          | 65                                                                                                                                                                                       | 169                                                                                                             | 38,5                                                                                                                                                                                                                                                                                                                  | 0,3                                                                                                                                                                                                                                                                                                                        | 1                                                                                                                                                                                                                                                                                               | 1                                                                                                                                                                                                                                                                                                     | 1                                                                                                                                                                                                                                                                    | 826,8                                                                                                                                     | 685,4                                                                                                                          | 1 (+0,2)                                                                                                                                               | 1                                                                                                                                                              | 1                                                                                                                                                                                                                                                  | 4,3                                                                                                      |
| Region 9                          | 128                                                                                                                                                                                      | 427                                                                                                             | 30,0                                                                                                                                                                                                                                                                                                                  | 0,0                                                                                                                                                                                                                                                                                                                        | 1                                                                                                                                                                                                                                                                                               | 1                                                                                                                                                                                                                                                                                                     | 1                                                                                                                                                                                                                                                                    | 1560,2                                                                                                                                    | 1464,3                                                                                                                         | 0,07                                                                                                                                                   | 1                                                                                                                                                              | 0                                                                                                                                                                                                                                                  | 3,0                                                                                                      |
| Region 10                         | 43                                                                                                                                                                                       | 158                                                                                                             | 27,2                                                                                                                                                                                                                                                                                                                  | 0,2                                                                                                                                                                                                                                                                                                                        | 1                                                                                                                                                                                                                                                                                               | 1                                                                                                                                                                                                                                                                                                     | 1                                                                                                                                                                                                                                                                    | 515                                                                                                                                       | 448,8                                                                                                                          | 0,5                                                                                                                                                    | 1                                                                                                                                                              | 1                                                                                                                                                                                                                                                  | 4,2                                                                                                      |
| Region 11                         | 532                                                                                                                                                                                      | 532                                                                                                             | 100,0                                                                                                                                                                                                                                                                                                                 | 1,0                                                                                                                                                                                                                                                                                                                        | 1                                                                                                                                                                                                                                                                                               | 1                                                                                                                                                                                                                                                                                                     | 1                                                                                                                                                                                                                                                                    |                                                                                                                                           |                                                                                                                                | 1                                                                                                                                                      | 0,5                                                                                                                                                            | 1                                                                                                                                                                                                                                                  | 4,5                                                                                                      |
| Region 12                         | 191                                                                                                                                                                                      | 191                                                                                                             | 100,0                                                                                                                                                                                                                                                                                                                 | 1,0                                                                                                                                                                                                                                                                                                                        | 1                                                                                                                                                                                                                                                                                               | 1                                                                                                                                                                                                                                                                                                     | 1                                                                                                                                                                                                                                                                    | 168,15                                                                                                                                    | 59                                                                                                                             | 1                                                                                                                                                      | 1                                                                                                                                                              | 1                                                                                                                                                                                                                                                  | 5,0                                                                                                      |
| Region 13                         | 176                                                                                                                                                                                      | 176                                                                                                             | 100,0                                                                                                                                                                                                                                                                                                                 | 1,0                                                                                                                                                                                                                                                                                                                        | 2                                                                                                                                                                                                                                                                                               | 0,4                                                                                                                                                                                                                                                                                                   | 1                                                                                                                                                                                                                                                                    |                                                                                                                                           |                                                                                                                                |                                                                                                                                                        |                                                                                                                                                                | 1                                                                                                                                                                                                                                                  | 3,4                                                                                                      |

**Indicators of the regional rehabilitation systems development in Russia (2019)**

| Regions of the Russian Federation | Number of organizations providing rehabilitation and (or) habilitation services and included in the regional system regarding to the formation an integrated approach to its arrangement | Total number of organizations providing rehabilitation and (or) habilitation services and located in the region | The share of organizations providing rehabilitation and (or) habilitation services and included in the regional system regarding to the formation an integrated approach to its arrangement in the total number of organizations providing rehabilitation and (or) habilitation services and located in the region, % | The share of organizations providing rehabilitation and (or) habilitation services and included in the regional system regarding to the formation an integrated approach to its arrangement in the total number of organizations providing rehabilitation and (or) habilitation services and located in the region, points | Number of regional agencies in various fields of activities (healthcare, education, social protection, physical culture and sports, culture, labor and employment, information and communication) involved in the formation of an integrated approach to the arrangement of the regional system | Number of regional agencies in various fields of activity (healthcare, education, social protection, physical culture and sports, culture, labor and employment, information and communication) involved in the formation of an integrated approach to the arrangement of the regional system, points | Availability of the legal and methodological base of the regional system for forming an integrated approach to its arrangement, agreements on interaction between providers of rehabilitation and (or) habilitation measures (presence – 1 point, absence – 0 point) | Funding allocated for rehabilitation and habilitation measures to meet the needs of the disabled in the assessment period, million rubles | Funding allocated for rehabilitation and habilitation measures to meet the needs of PwD in the previous period, million rubles | The share of changes in funding allocated for rehabilitation and habilitation measures to meet the needs of PwD in comparison with the previous period | The share of changes in funding allocated for rehabilitation and habilitation measures to meet the needs of PwD in comparison with the previous period, points | Availability of the feasible regional recommendations on options for the provision of rehabilitation and habilitation measures for PwD (plan approved by agencies, certificates, co-financing, and others) (presence - 1 point, absence - 0 point) | The formation of an integrated approach to the organization of the regional system in the region, points |
|-----------------------------------|------------------------------------------------------------------------------------------------------------------------------------------------------------------------------------------|-----------------------------------------------------------------------------------------------------------------|-----------------------------------------------------------------------------------------------------------------------------------------------------------------------------------------------------------------------------------------------------------------------------------------------------------------------|----------------------------------------------------------------------------------------------------------------------------------------------------------------------------------------------------------------------------------------------------------------------------------------------------------------------------|-------------------------------------------------------------------------------------------------------------------------------------------------------------------------------------------------------------------------------------------------------------------------------------------------|-------------------------------------------------------------------------------------------------------------------------------------------------------------------------------------------------------------------------------------------------------------------------------------------------------|----------------------------------------------------------------------------------------------------------------------------------------------------------------------------------------------------------------------------------------------------------------------|-------------------------------------------------------------------------------------------------------------------------------------------|--------------------------------------------------------------------------------------------------------------------------------|--------------------------------------------------------------------------------------------------------------------------------------------------------|----------------------------------------------------------------------------------------------------------------------------------------------------------------|----------------------------------------------------------------------------------------------------------------------------------------------------------------------------------------------------------------------------------------------------|----------------------------------------------------------------------------------------------------------|
| Region 14                         | 326                                                                                                                                                                                      | 326                                                                                                             | 100,0                                                                                                                                                                                                                                                                                                                 | 1,0                                                                                                                                                                                                                                                                                                                        | 6                                                                                                                                                                                                                                                                                               | 1                                                                                                                                                                                                                                                                                                     | 0                                                                                                                                                                                                                                                                    | 607                                                                                                                                       | 234                                                                                                                            | 1,6                                                                                                                                                    | 1                                                                                                                                                              | 0                                                                                                                                                                                                                                                  | 3,0                                                                                                      |
| Region 15                         | 6                                                                                                                                                                                        | 9                                                                                                               | 66,7                                                                                                                                                                                                                                                                                                                  | 0,6                                                                                                                                                                                                                                                                                                                        | 5                                                                                                                                                                                                                                                                                               | 0,7                                                                                                                                                                                                                                                                                                   | 0                                                                                                                                                                                                                                                                    | нет данных, на прежнем                                                                                                                    | нет данных, на прежнем                                                                                                         | 0,50                                                                                                                                                   | 0,5                                                                                                                                                            | 0                                                                                                                                                                                                                                                  | 1,8                                                                                                      |
| Region 16                         | 95                                                                                                                                                                                       | 135                                                                                                             | 70,4                                                                                                                                                                                                                                                                                                                  | 0,7                                                                                                                                                                                                                                                                                                                        | 1                                                                                                                                                                                                                                                                                               | 1                                                                                                                                                                                                                                                                                                     | 1                                                                                                                                                                                                                                                                    | 32481                                                                                                                                     | 844,4                                                                                                                          | 1                                                                                                                                                      | 1                                                                                                                                                              | 1                                                                                                                                                                                                                                                  | 4,7                                                                                                      |
| Region 17                         | 138                                                                                                                                                                                      | 362                                                                                                             | 38,1                                                                                                                                                                                                                                                                                                                  | 0,3                                                                                                                                                                                                                                                                                                                        | 6                                                                                                                                                                                                                                                                                               | 1                                                                                                                                                                                                                                                                                                     | 1                                                                                                                                                                                                                                                                    | 18,73                                                                                                                                     | 5,2                                                                                                                            | 2,6                                                                                                                                                    | 1                                                                                                                                                              | 1                                                                                                                                                                                                                                                  | 4,3                                                                                                      |
| Region 18                         | 35                                                                                                                                                                                       | 286                                                                                                             | 12,2                                                                                                                                                                                                                                                                                                                  | 0,1                                                                                                                                                                                                                                                                                                                        | 5                                                                                                                                                                                                                                                                                               | 0,7                                                                                                                                                                                                                                                                                                   | 1                                                                                                                                                                                                                                                                    | 20,6                                                                                                                                      | 13,6                                                                                                                           | 0,5                                                                                                                                                    | 1                                                                                                                                                              | 1                                                                                                                                                                                                                                                  | 3,8                                                                                                      |
| Region 19                         | 125                                                                                                                                                                                      | 406                                                                                                             | 30,8                                                                                                                                                                                                                                                                                                                  | 0,3                                                                                                                                                                                                                                                                                                                        | 5                                                                                                                                                                                                                                                                                               | 0,7                                                                                                                                                                                                                                                                                                   | 1                                                                                                                                                                                                                                                                    | 1425,1029                                                                                                                                 | 1530,793                                                                                                                       | 1,0                                                                                                                                                    | 0                                                                                                                                                              | 1                                                                                                                                                                                                                                                  | 3,0                                                                                                      |
| Region 20                         | 70                                                                                                                                                                                       | 115                                                                                                             | 60,9                                                                                                                                                                                                                                                                                                                  | 0,6                                                                                                                                                                                                                                                                                                                        | 5                                                                                                                                                                                                                                                                                               | 0,7                                                                                                                                                                                                                                                                                                   | 1                                                                                                                                                                                                                                                                    | 22405,908                                                                                                                                 | 13082,942                                                                                                                      | 0,7                                                                                                                                                    | 1                                                                                                                                                              | 1                                                                                                                                                                                                                                                  | 4,3                                                                                                      |
| Region 21                         | 57                                                                                                                                                                                       | 142                                                                                                             | 40,1                                                                                                                                                                                                                                                                                                                  | 0,4                                                                                                                                                                                                                                                                                                                        | 6                                                                                                                                                                                                                                                                                               | 1                                                                                                                                                                                                                                                                                                     | 0                                                                                                                                                                                                                                                                    | 7,1391                                                                                                                                    | 4,37655                                                                                                                        | 2,76255                                                                                                                                                | 1                                                                                                                                                              | 1                                                                                                                                                                                                                                                  | 3,4                                                                                                      |
| Region 22                         | 190                                                                                                                                                                                      | 190                                                                                                             | 100,0                                                                                                                                                                                                                                                                                                                 | 1,0                                                                                                                                                                                                                                                                                                                        | 5                                                                                                                                                                                                                                                                                               | 0,7                                                                                                                                                                                                                                                                                                   | 0                                                                                                                                                                                                                                                                    | 217,9                                                                                                                                     | 216,3                                                                                                                          | 0,5                                                                                                                                                    | 1                                                                                                                                                              | 1                                                                                                                                                                                                                                                  | 3,7                                                                                                      |
| Region 23                         | 42                                                                                                                                                                                       | 194                                                                                                             | 21,6                                                                                                                                                                                                                                                                                                                  | 0,2                                                                                                                                                                                                                                                                                                                        | 6                                                                                                                                                                                                                                                                                               | 1                                                                                                                                                                                                                                                                                                     | 1                                                                                                                                                                                                                                                                    | 2702,3                                                                                                                                    | 0                                                                                                                              | 0,5                                                                                                                                                    | 0,5                                                                                                                                                            | 0                                                                                                                                                                                                                                                  | 2,7                                                                                                      |
| Region 24                         | 31                                                                                                                                                                                       | 187                                                                                                             | 16,6                                                                                                                                                                                                                                                                                                                  | 0,1                                                                                                                                                                                                                                                                                                                        | 6                                                                                                                                                                                                                                                                                               | 1                                                                                                                                                                                                                                                                                                     | 1                                                                                                                                                                                                                                                                    | 574,1                                                                                                                                     | 334,3                                                                                                                          | 0,72                                                                                                                                                   | 1                                                                                                                                                              | 1                                                                                                                                                                                                                                                  | 4,1                                                                                                      |
| Region 25                         | 37                                                                                                                                                                                       | 125                                                                                                             | 29,6                                                                                                                                                                                                                                                                                                                  | 0,2                                                                                                                                                                                                                                                                                                                        | 1                                                                                                                                                                                                                                                                                               | 1                                                                                                                                                                                                                                                                                                     | 1                                                                                                                                                                                                                                                                    | 18519,892                                                                                                                                 | 16516,087                                                                                                                      | 1                                                                                                                                                      | 1                                                                                                                                                              | 0                                                                                                                                                                                                                                                  | 3,2                                                                                                      |
| Region 26                         | 35                                                                                                                                                                                       | 195                                                                                                             | 17,9                                                                                                                                                                                                                                                                                                                  | 0,1                                                                                                                                                                                                                                                                                                                        | 1                                                                                                                                                                                                                                                                                               | 1                                                                                                                                                                                                                                                                                                     | 1                                                                                                                                                                                                                                                                    | 23,16                                                                                                                                     | 17,42                                                                                                                          | 0,5                                                                                                                                                    | 1                                                                                                                                                              | 1                                                                                                                                                                                                                                                  | 4,1                                                                                                      |

**Indicators of the regional rehabilitation systems development in Russia (2019)**

| Regions of the Russian Federation | Number of organizations providing rehabilitation and (or) habilitation services and included in the regional system regarding to the formation an integrated approach to its arrangement | Total number of organizations providing rehabilitation and (or) habilitation services and located in the region | The share of organizations providing rehabilitation and (or) habilitation services and included in the regional system regarding to the formation an integrated approach to its arrangement in the total number of organizations providing rehabilitation and (or) habilitation services and located in the region, % | The share of organizations providing rehabilitation and (or) habilitation services and included in the regional system regarding to the formation an integrated approach to its arrangement in the total number of organizations providing rehabilitation and (or) habilitation services and located in the region, points | Number of regional agencies in various fields of activities (healthcare, education, social protection, physical culture and sports, culture, labor and employment, information and communication) involved in the formation of an integrated approach to the arrangement of the regional system | Number of regional agencies in various fields of activity (healthcare, education, social protection, physical culture and sports, culture, labor and employment, information and communication) involved in the formation of an integrated approach to the arrangement of the regional system, points | Availability of the legal and methodological base of the regional system for forming an integrated approach to its arrangement, agreements on interaction between providers of rehabilitation and (or) habilitation measures (presence – 1 point, absence – 0 point) | Funding allocated for rehabilitation and habilitation measures to meet the needs of the disabled in the assessment period, million rubles | Funding allocated for rehabilitation and habilitation measures to meet the needs of PwD in the previous period, million rubles | The share of changes in funding allocated for rehabilitation and habilitation measures to meet the needs of PwD in comparison with the previous period | The share of changes in funding allocated for rehabilitation and habilitation measures to meet the needs of PwD in comparison with the previous period, points | Availability of the feasible regional recommendations on options for the provision of rehabilitation and habilitation measures for PwD (plan approved by agencies, certificates, co-financing, and others) (presence - 1 point, absence - 0 point) | The formation of an integrated approach to the organization of the regional system in the region, points |
|-----------------------------------|------------------------------------------------------------------------------------------------------------------------------------------------------------------------------------------|-----------------------------------------------------------------------------------------------------------------|-----------------------------------------------------------------------------------------------------------------------------------------------------------------------------------------------------------------------------------------------------------------------------------------------------------------------|----------------------------------------------------------------------------------------------------------------------------------------------------------------------------------------------------------------------------------------------------------------------------------------------------------------------------|-------------------------------------------------------------------------------------------------------------------------------------------------------------------------------------------------------------------------------------------------------------------------------------------------|-------------------------------------------------------------------------------------------------------------------------------------------------------------------------------------------------------------------------------------------------------------------------------------------------------|----------------------------------------------------------------------------------------------------------------------------------------------------------------------------------------------------------------------------------------------------------------------|-------------------------------------------------------------------------------------------------------------------------------------------|--------------------------------------------------------------------------------------------------------------------------------|--------------------------------------------------------------------------------------------------------------------------------------------------------|----------------------------------------------------------------------------------------------------------------------------------------------------------------|----------------------------------------------------------------------------------------------------------------------------------------------------------------------------------------------------------------------------------------------------|----------------------------------------------------------------------------------------------------------|
| Region 27                         | 281                                                                                                                                                                                      | 1751                                                                                                            | 16,0                                                                                                                                                                                                                                                                                                                  | 0,1                                                                                                                                                                                                                                                                                                                        | 1                                                                                                                                                                                                                                                                                               | 1                                                                                                                                                                                                                                                                                                     | 1                                                                                                                                                                                                                                                                    | 16,7                                                                                                                                      | 2,4                                                                                                                            | 1                                                                                                                                                      | 1                                                                                                                                                              | 1                                                                                                                                                                                                                                                  | 4,1                                                                                                      |
| Region 28                         | 99                                                                                                                                                                                       | 101                                                                                                             | 98,0                                                                                                                                                                                                                                                                                                                  | 0,9                                                                                                                                                                                                                                                                                                                        | 1                                                                                                                                                                                                                                                                                               | 1                                                                                                                                                                                                                                                                                                     | 1                                                                                                                                                                                                                                                                    | 230,5                                                                                                                                     | 185,6                                                                                                                          | 0,2                                                                                                                                                    | 1                                                                                                                                                              | 1                                                                                                                                                                                                                                                  | 4,9                                                                                                      |
| Region 29                         | 36                                                                                                                                                                                       | 36                                                                                                              | 100,0                                                                                                                                                                                                                                                                                                                 | 1,0                                                                                                                                                                                                                                                                                                                        | 1                                                                                                                                                                                                                                                                                               | 1                                                                                                                                                                                                                                                                                                     | 1                                                                                                                                                                                                                                                                    | 1400                                                                                                                                      | 0                                                                                                                              | 1                                                                                                                                                      | 0,5                                                                                                                                                            | 0                                                                                                                                                                                                                                                  | 3,5                                                                                                      |
| Region 30                         | 551                                                                                                                                                                                      | 551                                                                                                             | 100,0                                                                                                                                                                                                                                                                                                                 | 1,0                                                                                                                                                                                                                                                                                                                        | 5                                                                                                                                                                                                                                                                                               | 0,7                                                                                                                                                                                                                                                                                                   | 1                                                                                                                                                                                                                                                                    | 24,8                                                                                                                                      | 0,148                                                                                                                          | 166,5675676                                                                                                                                            | 1                                                                                                                                                              | 1                                                                                                                                                                                                                                                  | 4,7                                                                                                      |
| Region 31                         | 56                                                                                                                                                                                       | 76                                                                                                              | 73,7                                                                                                                                                                                                                                                                                                                  | 0,7                                                                                                                                                                                                                                                                                                                        | 5                                                                                                                                                                                                                                                                                               | 0,7                                                                                                                                                                                                                                                                                                   | 1                                                                                                                                                                                                                                                                    | 47,65                                                                                                                                     | 39,9                                                                                                                           | 0,2                                                                                                                                                    | 1                                                                                                                                                              | 1                                                                                                                                                                                                                                                  | 4,4                                                                                                      |
| Region 32                         | 50                                                                                                                                                                                       | 55                                                                                                              | 90,9                                                                                                                                                                                                                                                                                                                  | 0,9                                                                                                                                                                                                                                                                                                                        | 1                                                                                                                                                                                                                                                                                               | 1                                                                                                                                                                                                                                                                                                     | 1                                                                                                                                                                                                                                                                    | 104,3                                                                                                                                     | 103,6                                                                                                                          | 1                                                                                                                                                      | 1                                                                                                                                                              | 1                                                                                                                                                                                                                                                  | 4,9                                                                                                      |
| Region 33                         | 1112                                                                                                                                                                                     | 1249                                                                                                            | 89,0                                                                                                                                                                                                                                                                                                                  | 0,8                                                                                                                                                                                                                                                                                                                        | 1                                                                                                                                                                                                                                                                                               | 1                                                                                                                                                                                                                                                                                                     | 1                                                                                                                                                                                                                                                                    |                                                                                                                                           |                                                                                                                                |                                                                                                                                                        | 0,5                                                                                                                                                            | 1                                                                                                                                                                                                                                                  | 4,3                                                                                                      |
| Region 34                         | 464                                                                                                                                                                                      | 476                                                                                                             | 97,5                                                                                                                                                                                                                                                                                                                  | 0,9                                                                                                                                                                                                                                                                                                                        | 4                                                                                                                                                                                                                                                                                               | 0,7                                                                                                                                                                                                                                                                                                   | 1                                                                                                                                                                                                                                                                    | 679,1                                                                                                                                     | 675,4                                                                                                                          | 1                                                                                                                                                      | 1                                                                                                                                                              | 1                                                                                                                                                                                                                                                  | 4,6                                                                                                      |
| Region 35                         | 33                                                                                                                                                                                       | 33                                                                                                              | 100,0                                                                                                                                                                                                                                                                                                                 | 1,0                                                                                                                                                                                                                                                                                                                        | 2                                                                                                                                                                                                                                                                                               | 0,4                                                                                                                                                                                                                                                                                                   | 1                                                                                                                                                                                                                                                                    | 0,213                                                                                                                                     | 0,526                                                                                                                          | -0,595                                                                                                                                                 | 0                                                                                                                                                              | 1                                                                                                                                                                                                                                                  | 3,4                                                                                                      |
| Region 36                         | 1830                                                                                                                                                                                     | 3892                                                                                                            | 47,0                                                                                                                                                                                                                                                                                                                  | 0,4                                                                                                                                                                                                                                                                                                                        | 6                                                                                                                                                                                                                                                                                               | 1                                                                                                                                                                                                                                                                                                     | 1                                                                                                                                                                                                                                                                    | 4412043129                                                                                                                                | 1134216768                                                                                                                     | 2,9                                                                                                                                                    | 1                                                                                                                                                              | 1                                                                                                                                                                                                                                                  | 4,4                                                                                                      |
| Region 37                         | 272                                                                                                                                                                                      | 283                                                                                                             | 96,1                                                                                                                                                                                                                                                                                                                  | 0,9                                                                                                                                                                                                                                                                                                                        | 6                                                                                                                                                                                                                                                                                               | 1                                                                                                                                                                                                                                                                                                     | 1                                                                                                                                                                                                                                                                    | 123247,0                                                                                                                                  | 61892,6                                                                                                                        | 1                                                                                                                                                      | 1                                                                                                                                                              | 1                                                                                                                                                                                                                                                  | 4,9                                                                                                      |
| Region 38                         | 73                                                                                                                                                                                       | 131                                                                                                             | 55,7                                                                                                                                                                                                                                                                                                                  | 0,5                                                                                                                                                                                                                                                                                                                        | 5                                                                                                                                                                                                                                                                                               | 0,7                                                                                                                                                                                                                                                                                                   | 1                                                                                                                                                                                                                                                                    | 211,89                                                                                                                                    | 195,99                                                                                                                         | 0,08                                                                                                                                                   | 1                                                                                                                                                              | 1                                                                                                                                                                                                                                                  | 4,2                                                                                                      |
| Region 39                         | 440                                                                                                                                                                                      | 916                                                                                                             | 48,0                                                                                                                                                                                                                                                                                                                  | 0,4                                                                                                                                                                                                                                                                                                                        | 6                                                                                                                                                                                                                                                                                               | 1                                                                                                                                                                                                                                                                                                     | 1                                                                                                                                                                                                                                                                    | 862,77                                                                                                                                    | 266,07                                                                                                                         | 2,24                                                                                                                                                   | 1                                                                                                                                                              | 1                                                                                                                                                                                                                                                  | 4,4                                                                                                      |

**Indicators of the regional rehabilitation systems development in Russia (2019)**

| Regions of the Russian Federation | Number of organizations providing rehabilitation and (or) habilitation services and included in the regional system regarding to the formation an integrated approach to its arrangement | Total number of organizations providing rehabilitation and (or) habilitation services and located in the region | The share of organizations providing rehabilitation and (or) habilitation services and included in the regional system regarding to the formation an integrated approach to its arrangement in the total number of organizations providing rehabilitation and (or) habilitation services and located in the region, % | The share of organizations providing rehabilitation and (or) habilitation services and included in the regional system regarding to the formation an integrated approach to its arrangement in the total number of organizations providing rehabilitation and (or) habilitation services and located in the region, points | Number of regional agencies in various fields of activities (healthcare, education, social protection, physical culture and sports, culture, labor and employment, information and communication) involved in the formation of an integrated approach to the arrangement of the regional system | Number of regional agencies in various fields of activity (healthcare, education, social protection, physical culture and sports, culture, labor and employment, information and communication) involved in the formation of an integrated approach to the arrangement of the regional system, points | Availability of the legal and methodological base of the regional system for forming an integrated approach to its arrangement, agreements on interaction between providers of rehabilitation and (or) habilitation measures (presence – 1 point, absence – 0 point) | Funding allocated for rehabilitation and habilitation measures to meet the needs of the disabled in the assessment period, million rubles | Funding allocated for rehabilitation and habilitation measures to meet the needs of PwD in the previous period, million rubles | The share of changes in funding allocated for rehabilitation and habilitation measures to meet the needs of PwD in comparison with the previous period | The share of changes in funding allocated for rehabilitation and habilitation measures to meet the needs of PwD in comparison with the previous period, points | Availability of the feasible regional recommendations on options for the provision of rehabilitation and habilitation measures for PwD (plan approved by agencies, certificates, co-financing, and others) (presence - 1 point, absence - 0 point) | The formation of an integrated approach to the organization of the regional system in the region, points |
|-----------------------------------|------------------------------------------------------------------------------------------------------------------------------------------------------------------------------------------|-----------------------------------------------------------------------------------------------------------------|-----------------------------------------------------------------------------------------------------------------------------------------------------------------------------------------------------------------------------------------------------------------------------------------------------------------------|----------------------------------------------------------------------------------------------------------------------------------------------------------------------------------------------------------------------------------------------------------------------------------------------------------------------------|-------------------------------------------------------------------------------------------------------------------------------------------------------------------------------------------------------------------------------------------------------------------------------------------------|-------------------------------------------------------------------------------------------------------------------------------------------------------------------------------------------------------------------------------------------------------------------------------------------------------|----------------------------------------------------------------------------------------------------------------------------------------------------------------------------------------------------------------------------------------------------------------------|-------------------------------------------------------------------------------------------------------------------------------------------|--------------------------------------------------------------------------------------------------------------------------------|--------------------------------------------------------------------------------------------------------------------------------------------------------|----------------------------------------------------------------------------------------------------------------------------------------------------------------|----------------------------------------------------------------------------------------------------------------------------------------------------------------------------------------------------------------------------------------------------|----------------------------------------------------------------------------------------------------------|
| Region 40                         | 174                                                                                                                                                                                      | 174                                                                                                             | 100,0                                                                                                                                                                                                                                                                                                                 | 1,0                                                                                                                                                                                                                                                                                                                        | 1                                                                                                                                                                                                                                                                                               | 1                                                                                                                                                                                                                                                                                                     | 1                                                                                                                                                                                                                                                                    | 2383,0                                                                                                                                    | 1616,2                                                                                                                         | 1                                                                                                                                                      | 1                                                                                                                                                              | 1                                                                                                                                                                                                                                                  | 5,0                                                                                                      |
| Region 41                         | 153                                                                                                                                                                                      | 713                                                                                                             | 21,5                                                                                                                                                                                                                                                                                                                  | 0,2                                                                                                                                                                                                                                                                                                                        | 1                                                                                                                                                                                                                                                                                               | 1                                                                                                                                                                                                                                                                                                     | 1                                                                                                                                                                                                                                                                    | 237,18                                                                                                                                    | 229,76                                                                                                                         | 1                                                                                                                                                      | 1                                                                                                                                                              | 1                                                                                                                                                                                                                                                  | 4,2                                                                                                      |
| Region 42                         | 5                                                                                                                                                                                        | 5                                                                                                               | 100,0                                                                                                                                                                                                                                                                                                                 | 1,0                                                                                                                                                                                                                                                                                                                        | 5                                                                                                                                                                                                                                                                                               | 0,7                                                                                                                                                                                                                                                                                                   | 1                                                                                                                                                                                                                                                                    | 147,6135085                                                                                                                               | 101,9611515                                                                                                                    | 1                                                                                                                                                      | 1                                                                                                                                                              | 0                                                                                                                                                                                                                                                  | 3,7                                                                                                      |
| Region 43                         | 1022                                                                                                                                                                                     | 1022                                                                                                            | 100,0                                                                                                                                                                                                                                                                                                                 | 1,0                                                                                                                                                                                                                                                                                                                        | 1                                                                                                                                                                                                                                                                                               | 1                                                                                                                                                                                                                                                                                                     | 1                                                                                                                                                                                                                                                                    | 170,84                                                                                                                                    | 159,62                                                                                                                         | 1                                                                                                                                                      | 1                                                                                                                                                              | 1                                                                                                                                                                                                                                                  | 5,0                                                                                                      |
| Region 44                         | 88                                                                                                                                                                                       | 88                                                                                                              | 100,0                                                                                                                                                                                                                                                                                                                 | 1,0                                                                                                                                                                                                                                                                                                                        | 1                                                                                                                                                                                                                                                                                               | 1                                                                                                                                                                                                                                                                                                     | 1                                                                                                                                                                                                                                                                    | 0                                                                                                                                         | 0                                                                                                                              | 0                                                                                                                                                      | 0,5                                                                                                                                                            | 0                                                                                                                                                                                                                                                  | 3,5                                                                                                      |
| Region 45                         | 128                                                                                                                                                                                      | 313                                                                                                             | 40,9                                                                                                                                                                                                                                                                                                                  | 0,4                                                                                                                                                                                                                                                                                                                        | 1                                                                                                                                                                                                                                                                                               | 1                                                                                                                                                                                                                                                                                                     | 1                                                                                                                                                                                                                                                                    | 45019,9                                                                                                                                   | 44063,31                                                                                                                       | 1                                                                                                                                                      | 1                                                                                                                                                              | 1                                                                                                                                                                                                                                                  | 4,4                                                                                                      |
| Region 46                         | 6                                                                                                                                                                                        | 6                                                                                                               | 100,0                                                                                                                                                                                                                                                                                                                 | 1,0                                                                                                                                                                                                                                                                                                                        | 1                                                                                                                                                                                                                                                                                               | 1                                                                                                                                                                                                                                                                                                     | 0                                                                                                                                                                                                                                                                    | 13,321                                                                                                                                    | 11,32                                                                                                                          | 1                                                                                                                                                      | 1                                                                                                                                                              | 0                                                                                                                                                                                                                                                  | 3,0                                                                                                      |
| Region 47                         | 34                                                                                                                                                                                       | 204                                                                                                             | 16,7                                                                                                                                                                                                                                                                                                                  | 0,1                                                                                                                                                                                                                                                                                                                        | 5                                                                                                                                                                                                                                                                                               | 0,7                                                                                                                                                                                                                                                                                                   | 1                                                                                                                                                                                                                                                                    | 300                                                                                                                                       | 300                                                                                                                            | 0,5                                                                                                                                                    | 0,5                                                                                                                                                            | 0                                                                                                                                                                                                                                                  | 2,3                                                                                                      |
| Region 48                         | 0                                                                                                                                                                                        | 83                                                                                                              | 0,0                                                                                                                                                                                                                                                                                                                   | 0,0                                                                                                                                                                                                                                                                                                                        | 5                                                                                                                                                                                                                                                                                               | 0,7                                                                                                                                                                                                                                                                                                   | 1                                                                                                                                                                                                                                                                    | 281,7                                                                                                                                     | 253,2                                                                                                                          | 1                                                                                                                                                      | 1                                                                                                                                                              | 1                                                                                                                                                                                                                                                  | 3,7                                                                                                      |
| Region 49                         | 65                                                                                                                                                                                       | 65                                                                                                              | 100,0                                                                                                                                                                                                                                                                                                                 | 1,0                                                                                                                                                                                                                                                                                                                        | 5                                                                                                                                                                                                                                                                                               | 0,7                                                                                                                                                                                                                                                                                                   | 1                                                                                                                                                                                                                                                                    | 260,2                                                                                                                                     | 207,8                                                                                                                          | 1                                                                                                                                                      | 1                                                                                                                                                              | 1                                                                                                                                                                                                                                                  | 4,7                                                                                                      |
| Region 50                         | 207                                                                                                                                                                                      | 207                                                                                                             | 100,0                                                                                                                                                                                                                                                                                                                 | 1,0                                                                                                                                                                                                                                                                                                                        | 5                                                                                                                                                                                                                                                                                               | 0,7                                                                                                                                                                                                                                                                                                   | 1                                                                                                                                                                                                                                                                    | 364,6                                                                                                                                     | 590,5                                                                                                                          | 0,38                                                                                                                                                   | 0                                                                                                                                                              | 1                                                                                                                                                                                                                                                  | 3,7                                                                                                      |
| Region 51                         | 5                                                                                                                                                                                        | 5                                                                                                               | 100,0                                                                                                                                                                                                                                                                                                                 | 1,0                                                                                                                                                                                                                                                                                                                        | 6                                                                                                                                                                                                                                                                                               | 1                                                                                                                                                                                                                                                                                                     | 0                                                                                                                                                                                                                                                                    | 153                                                                                                                                       | 153                                                                                                                            | 0                                                                                                                                                      | 0,5                                                                                                                                                            | 0                                                                                                                                                                                                                                                  | 2,5                                                                                                      |
| Region 52                         | 76                                                                                                                                                                                       | 242                                                                                                             | 31,4                                                                                                                                                                                                                                                                                                                  | 0,3                                                                                                                                                                                                                                                                                                                        | 1                                                                                                                                                                                                                                                                                               | 1                                                                                                                                                                                                                                                                                                     | 1                                                                                                                                                                                                                                                                    | 682,5                                                                                                                                     | 659,9                                                                                                                          | 1                                                                                                                                                      | 1                                                                                                                                                              | 1                                                                                                                                                                                                                                                  | 4,3                                                                                                      |

**Indicators of the regional rehabilitation systems development in Russia (2019)**

| Regions of the Russian Federation | Number of organizations providing rehabilitation and (or) habilitation services and included in the regional system regarding to the formation an integrated approach to its arrangement | Total number of organizations providing rehabilitation and (or) habilitation services and located in the region | The share of organizations providing rehabilitation and (or) habilitation services and included in the regional system regarding to the formation an integrated approach to its arrangement in the total number of organizations providing rehabilitation and (or) habilitation services and located in the region, % | The share of organizations providing rehabilitation and (or) habilitation services and included in the regional system regarding to the formation an integrated approach to its arrangement in the total number of organizations providing rehabilitation and (or) habilitation services and located in the region, points | Number of regional agencies in various fields of activities (healthcare, education, social protection, physical culture and sports, culture, labor and employment, information and communication) involved in the formation of an integrated approach to the arrangement of the regional system | Number of regional agencies in various fields of activity (healthcare, education, social protection, physical culture and sports, culture, labor and employment, information and communication) involved in the formation of an integrated approach to the arrangement of the regional system, points | Availability of the legal and methodological base of the regional system for forming an integrated approach to its arrangement, agreements on interaction between providers of rehabilitation and (or) habilitation measures (presence – 1 point, absence – 0 point) | Funding allocated for rehabilitation and habilitation measures to meet the needs of the disabled in the assessment period, million rubles | Funding allocated for rehabilitation and habilitation measures to meet the needs of PwD in the previous period, million rubles | The share of changes in funding allocated for rehabilitation and habilitation measures to meet the needs of PwD in comparison with the previous period | The share of changes in funding allocated for rehabilitation and habilitation measures to meet the needs of PwD in comparison with the previous period, points | Availability of the feasible regional recommendations on options for the provision of rehabilitation and habilitation measures for PwD (plan approved by agencies, certificates, co-financing, and others) (presence - 1 point, absence - 0 point) | The formation of an integrated approach to the organization of the regional system in the region, points |
|-----------------------------------|------------------------------------------------------------------------------------------------------------------------------------------------------------------------------------------|-----------------------------------------------------------------------------------------------------------------|-----------------------------------------------------------------------------------------------------------------------------------------------------------------------------------------------------------------------------------------------------------------------------------------------------------------------|----------------------------------------------------------------------------------------------------------------------------------------------------------------------------------------------------------------------------------------------------------------------------------------------------------------------------|-------------------------------------------------------------------------------------------------------------------------------------------------------------------------------------------------------------------------------------------------------------------------------------------------|-------------------------------------------------------------------------------------------------------------------------------------------------------------------------------------------------------------------------------------------------------------------------------------------------------|----------------------------------------------------------------------------------------------------------------------------------------------------------------------------------------------------------------------------------------------------------------------|-------------------------------------------------------------------------------------------------------------------------------------------|--------------------------------------------------------------------------------------------------------------------------------|--------------------------------------------------------------------------------------------------------------------------------------------------------|----------------------------------------------------------------------------------------------------------------------------------------------------------------|----------------------------------------------------------------------------------------------------------------------------------------------------------------------------------------------------------------------------------------------------|----------------------------------------------------------------------------------------------------------|
| Region 53                         | 28                                                                                                                                                                                       | 174                                                                                                             | 16,1                                                                                                                                                                                                                                                                                                                  | 0,1                                                                                                                                                                                                                                                                                                                        | 1                                                                                                                                                                                                                                                                                               | 1                                                                                                                                                                                                                                                                                                     | 1                                                                                                                                                                                                                                                                    | 1265,9                                                                                                                                    | 997,7                                                                                                                          | 1                                                                                                                                                      | 1                                                                                                                                                              | 1                                                                                                                                                                                                                                                  | 4,1                                                                                                      |
| Region 54                         | 632                                                                                                                                                                                      | 980                                                                                                             | 64,5                                                                                                                                                                                                                                                                                                                  | 0,6                                                                                                                                                                                                                                                                                                                        | 4                                                                                                                                                                                                                                                                                               | 0,7                                                                                                                                                                                                                                                                                                   | 0                                                                                                                                                                                                                                                                    | 260,1                                                                                                                                     | 257,7                                                                                                                          | 0,01                                                                                                                                                   | 1                                                                                                                                                              | 0                                                                                                                                                                                                                                                  | 2,3                                                                                                      |
| Region 55                         | 36                                                                                                                                                                                       | 37                                                                                                              | 97,3                                                                                                                                                                                                                                                                                                                  | 0,9                                                                                                                                                                                                                                                                                                                        | 5                                                                                                                                                                                                                                                                                               | 0,7                                                                                                                                                                                                                                                                                                   | 0                                                                                                                                                                                                                                                                    | 36,32                                                                                                                                     | 0                                                                                                                              | 1                                                                                                                                                      | 0,5                                                                                                                                                            | 0                                                                                                                                                                                                                                                  | 2,1                                                                                                      |
| Region 56                         | 0                                                                                                                                                                                        | 479                                                                                                             | 0,0                                                                                                                                                                                                                                                                                                                   | 0,0                                                                                                                                                                                                                                                                                                                        | 5                                                                                                                                                                                                                                                                                               | 0,7                                                                                                                                                                                                                                                                                                   | 1                                                                                                                                                                                                                                                                    | 370                                                                                                                                       | 301,6                                                                                                                          | 1                                                                                                                                                      | 1                                                                                                                                                              | 1                                                                                                                                                                                                                                                  | 3,7                                                                                                      |
| Region 57                         | 374                                                                                                                                                                                      | 377                                                                                                             | 99,2                                                                                                                                                                                                                                                                                                                  | 0,9                                                                                                                                                                                                                                                                                                                        | 5                                                                                                                                                                                                                                                                                               | 0,7                                                                                                                                                                                                                                                                                                   | 1                                                                                                                                                                                                                                                                    | 0,8                                                                                                                                       | 0,8                                                                                                                            | 0                                                                                                                                                      | 0,5                                                                                                                                                            | 0                                                                                                                                                                                                                                                  | 3,1                                                                                                      |
| Region 58                         | 42                                                                                                                                                                                       | 129                                                                                                             | 32,6                                                                                                                                                                                                                                                                                                                  | 0,3                                                                                                                                                                                                                                                                                                                        | 1                                                                                                                                                                                                                                                                                               | 1                                                                                                                                                                                                                                                                                                     | 1                                                                                                                                                                                                                                                                    | 20,99                                                                                                                                     | 3,09                                                                                                                           | 5,79                                                                                                                                                   | 1                                                                                                                                                              | 1                                                                                                                                                                                                                                                  | 4,3                                                                                                      |
| Region 59                         | 35                                                                                                                                                                                       | 64                                                                                                              | 54,7                                                                                                                                                                                                                                                                                                                  | 0,5                                                                                                                                                                                                                                                                                                                        | 1                                                                                                                                                                                                                                                                                               | 1                                                                                                                                                                                                                                                                                                     | 1                                                                                                                                                                                                                                                                    | 217,879845                                                                                                                                | 128,910157                                                                                                                     | 0,713                                                                                                                                                  | 1                                                                                                                                                              | 1                                                                                                                                                                                                                                                  | 4,5                                                                                                      |
| Region 60                         | 97                                                                                                                                                                                       | 322                                                                                                             | 30,1                                                                                                                                                                                                                                                                                                                  | 0,3                                                                                                                                                                                                                                                                                                                        | 5                                                                                                                                                                                                                                                                                               | 0,7                                                                                                                                                                                                                                                                                                   | 1                                                                                                                                                                                                                                                                    | 46160,9                                                                                                                                   | 0                                                                                                                              | 1                                                                                                                                                      | 0,5                                                                                                                                                            | 1                                                                                                                                                                                                                                                  | 3,5                                                                                                      |
| Region 61                         | 254                                                                                                                                                                                      | 142                                                                                                             | 178,9                                                                                                                                                                                                                                                                                                                 | 0,0                                                                                                                                                                                                                                                                                                                        | 6                                                                                                                                                                                                                                                                                               | 1                                                                                                                                                                                                                                                                                                     | 1                                                                                                                                                                                                                                                                    | 3,5                                                                                                                                       | 2,8                                                                                                                            | 0,25                                                                                                                                                   | 1                                                                                                                                                              | 1                                                                                                                                                                                                                                                  | 4,0                                                                                                      |
| Region 62                         | 7                                                                                                                                                                                        | 36                                                                                                              | 19,4                                                                                                                                                                                                                                                                                                                  | 0,1                                                                                                                                                                                                                                                                                                                        | 5                                                                                                                                                                                                                                                                                               | 0,7                                                                                                                                                                                                                                                                                                   | 0                                                                                                                                                                                                                                                                    |                                                                                                                                           |                                                                                                                                | 0,5                                                                                                                                                    | 0,5                                                                                                                                                            | 0                                                                                                                                                                                                                                                  | 1,3                                                                                                      |
| Region 63                         | 214                                                                                                                                                                                      | 355                                                                                                             | 60,3                                                                                                                                                                                                                                                                                                                  | 0,6                                                                                                                                                                                                                                                                                                                        | 4                                                                                                                                                                                                                                                                                               | 0,7                                                                                                                                                                                                                                                                                                   | 1                                                                                                                                                                                                                                                                    |                                                                                                                                           |                                                                                                                                |                                                                                                                                                        | 0,5                                                                                                                                                            | 1                                                                                                                                                                                                                                                  | 3,8                                                                                                      |
| Region 64                         | 0                                                                                                                                                                                        | 178                                                                                                             | 0,0                                                                                                                                                                                                                                                                                                                   | 0,0                                                                                                                                                                                                                                                                                                                        | 5                                                                                                                                                                                                                                                                                               | 0,7                                                                                                                                                                                                                                                                                                   | 0                                                                                                                                                                                                                                                                    | 0                                                                                                                                         | 0                                                                                                                              | 0                                                                                                                                                      | 0,5                                                                                                                                                            | 1                                                                                                                                                                                                                                                  | 2,2                                                                                                      |
| Region 65                         | 33                                                                                                                                                                                       | 108                                                                                                             | 30,6                                                                                                                                                                                                                                                                                                                  | 0,3                                                                                                                                                                                                                                                                                                                        | 1                                                                                                                                                                                                                                                                                               | 1                                                                                                                                                                                                                                                                                                     | 1                                                                                                                                                                                                                                                                    | 83,603                                                                                                                                    | 10,974                                                                                                                         | 1                                                                                                                                                      | 1                                                                                                                                                              | 0                                                                                                                                                                                                                                                  | 3,3                                                                                                      |

**Indicators of the regional rehabilitation systems development in Russia (2019)**

| Regions of the Russian Federation | Number of organizations providing rehabilitation and (or) habilitation services and included in the regional system regarding to the formation an integrated approach to its arrangement | Total number of organizations providing rehabilitation and (or) habilitation services and located in the region | The share of organizations providing rehabilitation and (or) habilitation services and included in the regional system regarding to the formation an integrated approach to its arrangement in the total number of organizations providing rehabilitation and (or) habilitation services and located in the region, % | The share of organizations providing rehabilitation and (or) habilitation services and included in the regional system regarding to the formation an integrated approach to its arrangement in the total number of organizations providing rehabilitation and (or) habilitation services and located in the region, points | Number of regional agencies in various fields of activities (healthcare, education, social protection, physical culture and sports, culture, labor and employment, information and communication) involved in the formation of an integrated approach to the arrangement of the regional system | Number of regional agencies in various fields of activity (healthcare, education, social protection, physical culture and sports, culture, labor and employment, information and communication) involved in the formation of an integrated approach to the arrangement of the regional system, points | Availability of the legal and methodological system of the regional system for forming an integrated approach to its arrangement, agreements on interaction between providers of rehabilitation and (or) habilitation measures (presence – 1 point, absence – 0 point) | Funding allocated for rehabilitation and habilitation measures to meet the needs of the disabled in the assessment period, million rubles | Funding allocated for rehabilitation and habilitation measures to meet the needs of PwD in the previous period, million rubles | The share of changes in funding allocated for rehabilitation and habilitation measures to meet the needs of PwD in comparison with the previous period | The share of changes in funding allocated for rehabilitation and habilitation measures to meet the needs of PwD in comparison with the previous period, points | Availability of the feasible regional recommendations on options for the provision of rehabilitation and habilitation measures for PwD (plan approved by agencies, certificates, co-financing, and others) (presence - 1 point, absence - 0 point) | The formation of an integrated approach to the organization of the regional system in the region, points |
|-----------------------------------|------------------------------------------------------------------------------------------------------------------------------------------------------------------------------------------|-----------------------------------------------------------------------------------------------------------------|-----------------------------------------------------------------------------------------------------------------------------------------------------------------------------------------------------------------------------------------------------------------------------------------------------------------------|----------------------------------------------------------------------------------------------------------------------------------------------------------------------------------------------------------------------------------------------------------------------------------------------------------------------------|-------------------------------------------------------------------------------------------------------------------------------------------------------------------------------------------------------------------------------------------------------------------------------------------------|-------------------------------------------------------------------------------------------------------------------------------------------------------------------------------------------------------------------------------------------------------------------------------------------------------|------------------------------------------------------------------------------------------------------------------------------------------------------------------------------------------------------------------------------------------------------------------------|-------------------------------------------------------------------------------------------------------------------------------------------|--------------------------------------------------------------------------------------------------------------------------------|--------------------------------------------------------------------------------------------------------------------------------------------------------|----------------------------------------------------------------------------------------------------------------------------------------------------------------|----------------------------------------------------------------------------------------------------------------------------------------------------------------------------------------------------------------------------------------------------|----------------------------------------------------------------------------------------------------------|
| Region 66                         | 74                                                                                                                                                                                       | 614                                                                                                             | 12,1                                                                                                                                                                                                                                                                                                                  | 0,1                                                                                                                                                                                                                                                                                                                        | 5                                                                                                                                                                                                                                                                                               | 0,7                                                                                                                                                                                                                                                                                                   |                                                                                                                                                                                                                                                                        |                                                                                                                                           |                                                                                                                                |                                                                                                                                                        | 0,5                                                                                                                                                            |                                                                                                                                                                                                                                                    | 1,3                                                                                                      |
| Region 67                         | 2                                                                                                                                                                                        | 2                                                                                                               | 100,0                                                                                                                                                                                                                                                                                                                 | 1,0                                                                                                                                                                                                                                                                                                                        | 1                                                                                                                                                                                                                                                                                               | 1                                                                                                                                                                                                                                                                                                     | 1                                                                                                                                                                                                                                                                      | 141,3                                                                                                                                     | 370,9                                                                                                                          | 0                                                                                                                                                      | 0                                                                                                                                                              | 1                                                                                                                                                                                                                                                  | 4,0                                                                                                      |
| Region 68                         | 278                                                                                                                                                                                      | 334                                                                                                             | 83,2                                                                                                                                                                                                                                                                                                                  | 0,8                                                                                                                                                                                                                                                                                                                        | 6                                                                                                                                                                                                                                                                                               | 1                                                                                                                                                                                                                                                                                                     | 1                                                                                                                                                                                                                                                                      | 95 637,50                                                                                                                                 | 245 713,20                                                                                                                     | -0,6                                                                                                                                                   | 0                                                                                                                                                              | 1                                                                                                                                                                                                                                                  | 3,8                                                                                                      |
| Region 69                         | 19                                                                                                                                                                                       | 41                                                                                                              | 46,3                                                                                                                                                                                                                                                                                                                  | 0,4                                                                                                                                                                                                                                                                                                                        | 8                                                                                                                                                                                                                                                                                               | 1                                                                                                                                                                                                                                                                                                     | 1                                                                                                                                                                                                                                                                      | 24,00                                                                                                                                     | 19,00                                                                                                                          | 0,3                                                                                                                                                    | 1                                                                                                                                                              | 1                                                                                                                                                                                                                                                  | 4,4                                                                                                      |
| Region 70                         | 67                                                                                                                                                                                       | 1199                                                                                                            | 5,6                                                                                                                                                                                                                                                                                                                   | 0,0                                                                                                                                                                                                                                                                                                                        | 6                                                                                                                                                                                                                                                                                               | 1                                                                                                                                                                                                                                                                                                     | 1                                                                                                                                                                                                                                                                      | 10                                                                                                                                        | 7                                                                                                                              | 0,4                                                                                                                                                    | 1                                                                                                                                                              | 1                                                                                                                                                                                                                                                  | 4,0                                                                                                      |
| Region 71                         | 72                                                                                                                                                                                       | 96                                                                                                              | 75,0                                                                                                                                                                                                                                                                                                                  | 0,7                                                                                                                                                                                                                                                                                                                        | 6                                                                                                                                                                                                                                                                                               | 1                                                                                                                                                                                                                                                                                                     | 1                                                                                                                                                                                                                                                                      | 2,3369                                                                                                                                    | 2,3278                                                                                                                         | 1                                                                                                                                                      | 1                                                                                                                                                              | 0                                                                                                                                                                                                                                                  | 3,7                                                                                                      |
| Region 72                         | 44,0                                                                                                                                                                                     | 91,0                                                                                                            | 48,4                                                                                                                                                                                                                                                                                                                  | 0,4                                                                                                                                                                                                                                                                                                                        | 6                                                                                                                                                                                                                                                                                               | 1                                                                                                                                                                                                                                                                                                     | 0                                                                                                                                                                                                                                                                      | 3048,7                                                                                                                                    | 2453,2                                                                                                                         | 1                                                                                                                                                      | 1                                                                                                                                                              | 0                                                                                                                                                                                                                                                  | 2,4                                                                                                      |
| Region 73                         | 0                                                                                                                                                                                        | 578                                                                                                             | 0,0                                                                                                                                                                                                                                                                                                                   | 0,0                                                                                                                                                                                                                                                                                                                        | 0                                                                                                                                                                                                                                                                                               | 0                                                                                                                                                                                                                                                                                                     | 1                                                                                                                                                                                                                                                                      | 30,95                                                                                                                                     | 20,73                                                                                                                          | 1,0                                                                                                                                                    | 1                                                                                                                                                              | 1                                                                                                                                                                                                                                                  | 3,0                                                                                                      |
| Region 74                         | 119                                                                                                                                                                                      | 503                                                                                                             | 23,7                                                                                                                                                                                                                                                                                                                  | 0,2                                                                                                                                                                                                                                                                                                                        | 6                                                                                                                                                                                                                                                                                               | 1                                                                                                                                                                                                                                                                                                     | 1                                                                                                                                                                                                                                                                      | 0,00                                                                                                                                      | 0,00                                                                                                                           | 0,0                                                                                                                                                    | 0,5                                                                                                                                                            | 1                                                                                                                                                                                                                                                  | 3,7                                                                                                      |
| Region 75                         | 325                                                                                                                                                                                      | 524                                                                                                             | 62,0                                                                                                                                                                                                                                                                                                                  | 0,6                                                                                                                                                                                                                                                                                                                        | 1                                                                                                                                                                                                                                                                                               | 1                                                                                                                                                                                                                                                                                                     | 1                                                                                                                                                                                                                                                                      | 1309,6                                                                                                                                    | 1217,4                                                                                                                         | 1                                                                                                                                                      | 1                                                                                                                                                              | 1                                                                                                                                                                                                                                                  | 4,6                                                                                                      |
| Region 76                         | 106                                                                                                                                                                                      | 106                                                                                                             | 100,0                                                                                                                                                                                                                                                                                                                 | 1,0                                                                                                                                                                                                                                                                                                                        | 5                                                                                                                                                                                                                                                                                               | 0,7                                                                                                                                                                                                                                                                                                   | 1                                                                                                                                                                                                                                                                      |                                                                                                                                           |                                                                                                                                | 1                                                                                                                                                      | 0,5                                                                                                                                                            | 1                                                                                                                                                                                                                                                  | 4,2                                                                                                      |
| Region 77                         | 19                                                                                                                                                                                       | 57                                                                                                              | 33,3                                                                                                                                                                                                                                                                                                                  | 0,3                                                                                                                                                                                                                                                                                                                        | 6                                                                                                                                                                                                                                                                                               | 1                                                                                                                                                                                                                                                                                                     | 1                                                                                                                                                                                                                                                                      | 67208,1                                                                                                                                   | 49871                                                                                                                          | 0,35                                                                                                                                                   | 1                                                                                                                                                              | 1                                                                                                                                                                                                                                                  | 4,3                                                                                                      |
| Region 78                         | 35                                                                                                                                                                                       | 64                                                                                                              | 54,7                                                                                                                                                                                                                                                                                                                  | 0,5                                                                                                                                                                                                                                                                                                                        | 1                                                                                                                                                                                                                                                                                               | 1                                                                                                                                                                                                                                                                                                     | 1                                                                                                                                                                                                                                                                      | 831,6                                                                                                                                     | 674,2                                                                                                                          | 1                                                                                                                                                      | 1                                                                                                                                                              | 1                                                                                                                                                                                                                                                  | 4,5                                                                                                      |

**Indicators of the regional rehabilitation systems development in Russia (2019)**

| Regions of the Russian Federation | Number of organizations providing rehabilitation and (or) habilitation services and included in the regional system regarding to the formation an integrated approach to its arrangement | Total number of organizations providing rehabilitation and (or) habilitation services and located in the region | The share of organizations providing rehabilitation and (or) habilitation services and included in the regional system regarding to the formation an integrated approach to its arrangement in the total number of organizations providing rehabilitation and (or) habilitation services and located in the region, % | The share of organizations providing rehabilitation and (or) habilitation services and included in the regional system regarding to the formation an integrated approach to its arrangement in the total number of organizations providing rehabilitation and (or) habilitation services and located in the region, points | Number of regional agencies in various fields of activities (healthcare, education, social protection, physical culture and sports, culture, labor and employment, information and communication) involved in the formation of an integrated approach to the arrangement of the regional system | Number of regional agencies in various fields of activity (healthcare, education, social protection, physical culture and sports, culture, labor and employment, information and communication) involved in the formation of an integrated approach to the arrangement of the regional system, points | Availability of the legal and methodological base of the regional system for forming an integrated approach to its arrangement, agreements on interaction between providers of rehabilitation and (or) habilitation measures (presence – 1 point, absence – 0 point) | Funding allocated for rehabilitation and habilitation measures to meet the needs of the disabled in the assessment period, million rubles | Funding allocated for rehabilitation and habilitation measures to meet the needs of PwD in the previous period, million rubles | The share of changes in funding allocated for rehabilitation and habilitation measures to meet the needs of PwD in comparison with the previous period | The share of changes in funding allocated for rehabilitation and habilitation measures to meet the needs of PwD in comparison with the previous period, points | Availability of the feasible regional recommendations on options for the provision of rehabilitation and habilitation measures for PwD (plan approved by agencies, certificates, co-financing, and others) (presence - 1 point, absence - 0 point) | The formation of an integrated approach to the organization of the regional system in the region, points |
|-----------------------------------|------------------------------------------------------------------------------------------------------------------------------------------------------------------------------------------|-----------------------------------------------------------------------------------------------------------------|-----------------------------------------------------------------------------------------------------------------------------------------------------------------------------------------------------------------------------------------------------------------------------------------------------------------------|----------------------------------------------------------------------------------------------------------------------------------------------------------------------------------------------------------------------------------------------------------------------------------------------------------------------------|-------------------------------------------------------------------------------------------------------------------------------------------------------------------------------------------------------------------------------------------------------------------------------------------------|-------------------------------------------------------------------------------------------------------------------------------------------------------------------------------------------------------------------------------------------------------------------------------------------------------|----------------------------------------------------------------------------------------------------------------------------------------------------------------------------------------------------------------------------------------------------------------------|-------------------------------------------------------------------------------------------------------------------------------------------|--------------------------------------------------------------------------------------------------------------------------------|--------------------------------------------------------------------------------------------------------------------------------------------------------|----------------------------------------------------------------------------------------------------------------------------------------------------------------|----------------------------------------------------------------------------------------------------------------------------------------------------------------------------------------------------------------------------------------------------|----------------------------------------------------------------------------------------------------------|
| Region 79                         | 1192                                                                                                                                                                                     | 1192                                                                                                            | 100,0                                                                                                                                                                                                                                                                                                                 | 1,0                                                                                                                                                                                                                                                                                                                        | 1                                                                                                                                                                                                                                                                                               | 1                                                                                                                                                                                                                                                                                                     | 1                                                                                                                                                                                                                                                                    | 135955,8                                                                                                                                  | 192554,6                                                                                                                       | -0,29                                                                                                                                                  | 0                                                                                                                                                              | 1                                                                                                                                                                                                                                                  | 4,0                                                                                                      |
| Region 80                         | 1250                                                                                                                                                                                     | 1250                                                                                                            | 100,0                                                                                                                                                                                                                                                                                                                 | 1,0                                                                                                                                                                                                                                                                                                                        | 1                                                                                                                                                                                                                                                                                               | 1                                                                                                                                                                                                                                                                                                     | 1                                                                                                                                                                                                                                                                    | -                                                                                                                                         | -                                                                                                                              | 0                                                                                                                                                      | 0,5                                                                                                                                                            | 1                                                                                                                                                                                                                                                  | 4,5                                                                                                      |
| Region 81                         | 9                                                                                                                                                                                        | 9                                                                                                               | 100,0                                                                                                                                                                                                                                                                                                                 | 1,0                                                                                                                                                                                                                                                                                                                        | 1                                                                                                                                                                                                                                                                                               | 1                                                                                                                                                                                                                                                                                                     | 1                                                                                                                                                                                                                                                                    | 998,804511                                                                                                                                | 773,805749                                                                                                                     | 0,3                                                                                                                                                    | 1                                                                                                                                                              | 1                                                                                                                                                                                                                                                  | 5,0                                                                                                      |
| Region 82                         | 103                                                                                                                                                                                      | 734                                                                                                             | 14,0                                                                                                                                                                                                                                                                                                                  | 0,1                                                                                                                                                                                                                                                                                                                        | 5                                                                                                                                                                                                                                                                                               | 0,7                                                                                                                                                                                                                                                                                                   | 1                                                                                                                                                                                                                                                                    | 1489,9                                                                                                                                    | 1347                                                                                                                           | 1                                                                                                                                                      | 1                                                                                                                                                              | 1                                                                                                                                                                                                                                                  | 3,8                                                                                                      |
| Region 83                         | 116                                                                                                                                                                                      | 116                                                                                                             | 100,0                                                                                                                                                                                                                                                                                                                 | 1,0                                                                                                                                                                                                                                                                                                                        | 4                                                                                                                                                                                                                                                                                               | 0,7                                                                                                                                                                                                                                                                                                   | 1                                                                                                                                                                                                                                                                    |                                                                                                                                           |                                                                                                                                | 0                                                                                                                                                      |                                                                                                                                                                | 0                                                                                                                                                                                                                                                  | 2,7                                                                                                      |
| Region 84                         | 329                                                                                                                                                                                      | 372                                                                                                             | 88,4                                                                                                                                                                                                                                                                                                                  | 0,8                                                                                                                                                                                                                                                                                                                        | 6                                                                                                                                                                                                                                                                                               | 1                                                                                                                                                                                                                                                                                                     | 1                                                                                                                                                                                                                                                                    | 44,1                                                                                                                                      | 41                                                                                                                             | 0,1                                                                                                                                                    | 1                                                                                                                                                              | 1                                                                                                                                                                                                                                                  | 4,8                                                                                                      |
| Region 85                         | 50                                                                                                                                                                                       | 114                                                                                                             | 43,9                                                                                                                                                                                                                                                                                                                  | 0,4                                                                                                                                                                                                                                                                                                                        | 1                                                                                                                                                                                                                                                                                               | 1                                                                                                                                                                                                                                                                                                     | 1                                                                                                                                                                                                                                                                    | 2185,33698                                                                                                                                | 2024,20286                                                                                                                     | 1                                                                                                                                                      | 1                                                                                                                                                              | 1                                                                                                                                                                                                                                                  | 4,4                                                                                                      |

**Indicators of the regional rehabilitation systems development in Russia (2019)**

| Regions of the Russian Federation | Total number of PwD (their legal representatives) who were interviewed on the quality of the provision of rehabilitation and (or) habilitation services | Number of PwD (their legal representatives) who are satisfied with the quality of the provision of rehabilitation and (or) habilitation services | The share of PwD (their legal representatives) who are satisfied with the quality of the provision of rehabilitation and (or) habilitation services in the total number of interviewed PwD (their legal representatives), % | The share of PwD (their legal representatives) who are satisfied with the quality of the provision of rehabilitation and (or) habilitation services in the total number of interviewed PwD (their legal representatives), % | The share of PwD (their legal representatives) who are satisfied with the quality of the provision of rehabilitation and (or) habilitation services in the total number of interviewed PwD (their legal representatives), points | Total number of PwD (their legal representatives) who were interviewed to evaluate the system for the provision of rehabilitation and (or) habilitation services | Number of PwD (their legal representatives) who evaluate positively the system for the provision of rehabilitation and (or) habilitation services | The share of PwD (their legal representatives) who evaluate positively the system for the provision of rehabilitation and (or) habilitation services in the total number of interviewed PwD (their legal representatives), % | The share of PwD (their legal representatives) who evaluate positively the system for the provision of rehabilitation and (or) habilitation services in the total number of interviewed PwD (their legal representatives), % | The share of PwD (their legal representatives) who evaluate positively the system for the provision of rehabilitation and (or) habilitation services in the total number of interviewed PwD (their legal representatives), points | The satisfaction of PwD (their legal representatives) with rehabilitation or habilitation measures (services), points |
|-----------------------------------|---------------------------------------------------------------------------------------------------------------------------------------------------------|--------------------------------------------------------------------------------------------------------------------------------------------------|-----------------------------------------------------------------------------------------------------------------------------------------------------------------------------------------------------------------------------|-----------------------------------------------------------------------------------------------------------------------------------------------------------------------------------------------------------------------------|----------------------------------------------------------------------------------------------------------------------------------------------------------------------------------------------------------------------------------|------------------------------------------------------------------------------------------------------------------------------------------------------------------|---------------------------------------------------------------------------------------------------------------------------------------------------|------------------------------------------------------------------------------------------------------------------------------------------------------------------------------------------------------------------------------|------------------------------------------------------------------------------------------------------------------------------------------------------------------------------------------------------------------------------|-----------------------------------------------------------------------------------------------------------------------------------------------------------------------------------------------------------------------------------|-----------------------------------------------------------------------------------------------------------------------|
| Region 1                          | 100                                                                                                                                                     | 105,8                                                                                                                                            | 1                                                                                                                                                                                                                           | 105,8                                                                                                                                                                                                                       | 1                                                                                                                                                                                                                                | 100                                                                                                                                                              | 88                                                                                                                                                | 0,8                                                                                                                                                                                                                          | 88,0                                                                                                                                                                                                                         | 0,8                                                                                                                                                                                                                               | 1,8                                                                                                                   |
| Region 2                          | 317                                                                                                                                                     | 258                                                                                                                                              | 81,4                                                                                                                                                                                                                        | 81,4                                                                                                                                                                                                                        | 0,8                                                                                                                                                                                                                              | 317                                                                                                                                                              | 166                                                                                                                                               | 52,4                                                                                                                                                                                                                         | 52,4                                                                                                                                                                                                                         | 0,5                                                                                                                                                                                                                               | 1,3                                                                                                                   |
| Region 3                          | 6832                                                                                                                                                    | 3347                                                                                                                                             | 0,4                                                                                                                                                                                                                         | 49,0                                                                                                                                                                                                                        | 0,4                                                                                                                                                                                                                              | 6832                                                                                                                                                             | 3416                                                                                                                                              | 0,5                                                                                                                                                                                                                          | 50,0                                                                                                                                                                                                                         | 0,5                                                                                                                                                                                                                               | 0,9                                                                                                                   |
| Region 4                          | 509                                                                                                                                                     | 505                                                                                                                                              | 99,2                                                                                                                                                                                                                        | 99,2                                                                                                                                                                                                                        | 0,9                                                                                                                                                                                                                              | 509                                                                                                                                                              | 372                                                                                                                                               | 73                                                                                                                                                                                                                           | 73,1                                                                                                                                                                                                                         | 0,7                                                                                                                                                                                                                               | 1,6                                                                                                                   |
| Region 5                          | 514                                                                                                                                                     | 467                                                                                                                                              | 91                                                                                                                                                                                                                          | 90,9                                                                                                                                                                                                                        | 0,9                                                                                                                                                                                                                              | 514                                                                                                                                                              | 452                                                                                                                                               | 88                                                                                                                                                                                                                           | 87,9                                                                                                                                                                                                                         | 0,8                                                                                                                                                                                                                               | 1,7                                                                                                                   |
| Region 6                          | 1744                                                                                                                                                    | 1219                                                                                                                                             | 69,8                                                                                                                                                                                                                        | 69,9                                                                                                                                                                                                                        | 0,6                                                                                                                                                                                                                              | 1744                                                                                                                                                             | 870                                                                                                                                               | 49,8                                                                                                                                                                                                                         | 49,9                                                                                                                                                                                                                         | 0,4                                                                                                                                                                                                                               | 1                                                                                                                     |
| Region 7                          | 14120                                                                                                                                                   | 12143                                                                                                                                            | 86                                                                                                                                                                                                                          | 86,0                                                                                                                                                                                                                        | 0,8                                                                                                                                                                                                                              | 14120                                                                                                                                                            | 12143                                                                                                                                             | 86                                                                                                                                                                                                                           | 86,0                                                                                                                                                                                                                         | 0,8                                                                                                                                                                                                                               | 1,6                                                                                                                   |
| Region 8                          | 2292                                                                                                                                                    | 2276                                                                                                                                             | 99,3                                                                                                                                                                                                                        | 99,3                                                                                                                                                                                                                        | 0,9                                                                                                                                                                                                                              | 331                                                                                                                                                              | 170                                                                                                                                               | 51,4                                                                                                                                                                                                                         | 51,4                                                                                                                                                                                                                         | 0,5                                                                                                                                                                                                                               | 1,4                                                                                                                   |
| Region 9                          | 1430                                                                                                                                                    | 1293                                                                                                                                             | 90,4                                                                                                                                                                                                                        | 90,4                                                                                                                                                                                                                        | 0,9                                                                                                                                                                                                                              | 1430                                                                                                                                                             | 1248                                                                                                                                              | 87,3                                                                                                                                                                                                                         | 87,3                                                                                                                                                                                                                         | 0,8                                                                                                                                                                                                                               | 1,7                                                                                                                   |
| Region 10                         |                                                                                                                                                         |                                                                                                                                                  | 85,4                                                                                                                                                                                                                        | 85,4                                                                                                                                                                                                                        | 0,8                                                                                                                                                                                                                              |                                                                                                                                                                  |                                                                                                                                                   | 85,4                                                                                                                                                                                                                         | 85,4                                                                                                                                                                                                                         | 0,8                                                                                                                                                                                                                               | 1,6                                                                                                                   |
| Region 11                         | 600                                                                                                                                                     | 243                                                                                                                                              | 0,4                                                                                                                                                                                                                         | 40,5                                                                                                                                                                                                                        | 0,4                                                                                                                                                                                                                              | 600                                                                                                                                                              | 243                                                                                                                                               | 0,4                                                                                                                                                                                                                          | 40,5                                                                                                                                                                                                                         | 0,4                                                                                                                                                                                                                               | 0,8                                                                                                                   |
| Region 12                         | 13292                                                                                                                                                   | 13110                                                                                                                                            | 98,6                                                                                                                                                                                                                        | 98,6                                                                                                                                                                                                                        | 0,9                                                                                                                                                                                                                              | 13159                                                                                                                                                            | 12985                                                                                                                                             | 98,6                                                                                                                                                                                                                         | 98,7                                                                                                                                                                                                                         | 0,9                                                                                                                                                                                                                               | 1,8                                                                                                                   |
| Region 13                         | 42277                                                                                                                                                   | 38895                                                                                                                                            | 92,0                                                                                                                                                                                                                        | 92,0                                                                                                                                                                                                                        | 0,9                                                                                                                                                                                                                              | 42277                                                                                                                                                            | 38895                                                                                                                                             | 92,0                                                                                                                                                                                                                         | 92,0                                                                                                                                                                                                                         | 0,9                                                                                                                                                                                                                               | 1,8                                                                                                                   |
| Region 14                         | 2207                                                                                                                                                    | 2172                                                                                                                                             | 0,9                                                                                                                                                                                                                         | 98,4                                                                                                                                                                                                                        | 0,9                                                                                                                                                                                                                              | 300                                                                                                                                                              | 255                                                                                                                                               | 0,8                                                                                                                                                                                                                          | 85,0                                                                                                                                                                                                                         | 0,8                                                                                                                                                                                                                               | 1,7                                                                                                                   |
| Region 15                         | 1920                                                                                                                                                    | 1075                                                                                                                                             | 0,56                                                                                                                                                                                                                        | 56,0                                                                                                                                                                                                                        | 0,5                                                                                                                                                                                                                              | 1300                                                                                                                                                             | 633                                                                                                                                               | 0,49                                                                                                                                                                                                                         | 48,7                                                                                                                                                                                                                         | 0,4                                                                                                                                                                                                                               | 0,9                                                                                                                   |
| Region 16                         | 11467                                                                                                                                                   | 7812                                                                                                                                             | 68                                                                                                                                                                                                                          | 68,1                                                                                                                                                                                                                        | 0,6                                                                                                                                                                                                                              | 467                                                                                                                                                              | 461                                                                                                                                               | 98,7                                                                                                                                                                                                                         | 98,7                                                                                                                                                                                                                         | 0,9                                                                                                                                                                                                                               | 1,5                                                                                                                   |
| Region 17                         | 10260                                                                                                                                                   | 9492                                                                                                                                             | 92,5                                                                                                                                                                                                                        | 92,5                                                                                                                                                                                                                        | 0,9                                                                                                                                                                                                                              | 9106                                                                                                                                                             | 8465                                                                                                                                              | 92,9                                                                                                                                                                                                                         | 93,0                                                                                                                                                                                                                         | 0,9                                                                                                                                                                                                                               | 1,8                                                                                                                   |
| Region 18                         | 929                                                                                                                                                     | 706                                                                                                                                              | 76                                                                                                                                                                                                                          | 76,0                                                                                                                                                                                                                        | 0,7                                                                                                                                                                                                                              | 0                                                                                                                                                                | 0                                                                                                                                                 | 0                                                                                                                                                                                                                            | 0,0                                                                                                                                                                                                                          | 0                                                                                                                                                                                                                                 | 0,7                                                                                                                   |
| Region 19                         | 2987                                                                                                                                                    | 2714                                                                                                                                             | 0,9                                                                                                                                                                                                                         | 90,9                                                                                                                                                                                                                        | 0,9                                                                                                                                                                                                                              | 354                                                                                                                                                              | 285                                                                                                                                               | 0,8                                                                                                                                                                                                                          | 80,5                                                                                                                                                                                                                         | 0,8                                                                                                                                                                                                                               | 1,7                                                                                                                   |
| Region 20                         | 165                                                                                                                                                     | 151                                                                                                                                              | 91,5                                                                                                                                                                                                                        | 91,5                                                                                                                                                                                                                        | 0,9                                                                                                                                                                                                                              | 165                                                                                                                                                              | 111                                                                                                                                               | 67,3                                                                                                                                                                                                                         | 67,3                                                                                                                                                                                                                         | 0,6                                                                                                                                                                                                                               | 1,5                                                                                                                   |
| Region 21                         | 1395                                                                                                                                                    | 1186                                                                                                                                             | 85                                                                                                                                                                                                                          | 85,0                                                                                                                                                                                                                        | 0,8                                                                                                                                                                                                                              | 1395                                                                                                                                                             | 753                                                                                                                                               | 54                                                                                                                                                                                                                           | 54,0                                                                                                                                                                                                                         | 0,5                                                                                                                                                                                                                               | 1,3                                                                                                                   |
| Region 22                         | 1237                                                                                                                                                    | 1196                                                                                                                                             | 97                                                                                                                                                                                                                          | 96,7                                                                                                                                                                                                                        | 0,9                                                                                                                                                                                                                              | 670                                                                                                                                                              | 670                                                                                                                                               | 100                                                                                                                                                                                                                          | 100,0                                                                                                                                                                                                                        | 1                                                                                                                                                                                                                                 | 1,9                                                                                                                   |
| Region 23                         | 4332                                                                                                                                                    | 2804                                                                                                                                             | 90                                                                                                                                                                                                                          | 64,7                                                                                                                                                                                                                        | 0,6                                                                                                                                                                                                                              | 4332                                                                                                                                                             | 4049                                                                                                                                              | 0,9                                                                                                                                                                                                                          | 93,5                                                                                                                                                                                                                         | 0,9                                                                                                                                                                                                                               | 1,5                                                                                                                   |
| Region 24                         | 13121                                                                                                                                                   | 12983                                                                                                                                            | 98,9                                                                                                                                                                                                                        | 98,9                                                                                                                                                                                                                        | 0,9                                                                                                                                                                                                                              | 7012                                                                                                                                                             | 6886                                                                                                                                              | 98,2                                                                                                                                                                                                                         | 98,2                                                                                                                                                                                                                         | 0,9                                                                                                                                                                                                                               | 1,8                                                                                                                   |

**Indicators of the regional rehabilitation systems development in Russia (2019)**

| Regions of the Russian Federation | Total number of PwD (their legal representatives) who were interviewed on the quality of the provision of rehabilitation and (or) habilitation services | Number of PwD (their legal representatives) who are satisfied with the quality of the provision of rehabilitation and (or) habilitation services | The share of PwD (their legal representatives) who are satisfied with the quality of the provision of rehabilitation and (or) habilitation services in the total number of interviewed PwD (their legal representatives), % | The share of PwD (their legal representatives) who are satisfied with the quality of the provision of rehabilitation and (or) habilitation services in the total number of interviewed PwD (their legal representatives), % | The share of PwD (their legal representatives) who are satisfied with the quality of the provision of rehabilitation and (or) habilitation services in the total number of interviewed PwD (their legal representatives), points | Total number of PwD (their legal representatives) who were interviewed to evaluate the system for the provision of rehabilitation and (or) habilitation services | Number of PwD (their legal representatives) who evaluate positively the system for the provision of rehabilitation and (or) habilitation services | The share of PwD (their legal representatives) who evaluate positively the system for the provision of rehabilitation and (or) habilitation services in the total number of interviewed PwD (their legal representatives), % | The share of PwD (their legal representatives) who evaluate positively the system for the provision of rehabilitation and (or) habilitation services in the total number of interviewed PwD (their legal representatives), % | The share of PwD (their legal representatives) who evaluate positively the system for the provision of rehabilitation and (or) habilitation services in the total number of interviewed PwD (their legal representatives), points | The satisfaction of PwD (their legal representatives) with rehabilitation or habilitation measures (services), points |
|-----------------------------------|---------------------------------------------------------------------------------------------------------------------------------------------------------|--------------------------------------------------------------------------------------------------------------------------------------------------|-----------------------------------------------------------------------------------------------------------------------------------------------------------------------------------------------------------------------------|-----------------------------------------------------------------------------------------------------------------------------------------------------------------------------------------------------------------------------|----------------------------------------------------------------------------------------------------------------------------------------------------------------------------------------------------------------------------------|------------------------------------------------------------------------------------------------------------------------------------------------------------------|---------------------------------------------------------------------------------------------------------------------------------------------------|------------------------------------------------------------------------------------------------------------------------------------------------------------------------------------------------------------------------------|------------------------------------------------------------------------------------------------------------------------------------------------------------------------------------------------------------------------------|-----------------------------------------------------------------------------------------------------------------------------------------------------------------------------------------------------------------------------------|-----------------------------------------------------------------------------------------------------------------------|
| Region 25                         | 125                                                                                                                                                     | 105                                                                                                                                              | 84                                                                                                                                                                                                                          | 84,0                                                                                                                                                                                                                        | 0,8                                                                                                                                                                                                                              | 125                                                                                                                                                              | 102                                                                                                                                               | 81                                                                                                                                                                                                                           | 81,6                                                                                                                                                                                                                         | 0,8                                                                                                                                                                                                                               | 1,6                                                                                                                   |
| Region 26                         | 10288                                                                                                                                                   | 10156                                                                                                                                            | 98,7                                                                                                                                                                                                                        | 98,7                                                                                                                                                                                                                        | 0,9                                                                                                                                                                                                                              | 0                                                                                                                                                                | 0                                                                                                                                                 | 0                                                                                                                                                                                                                            | 0,0                                                                                                                                                                                                                          | 0                                                                                                                                                                                                                                 | 0,9                                                                                                                   |
| Region 27                         | 5458                                                                                                                                                    | 5080                                                                                                                                             | 0,9                                                                                                                                                                                                                         | 93,1                                                                                                                                                                                                                        | 0,9                                                                                                                                                                                                                              | 5466                                                                                                                                                             | 4883                                                                                                                                              | 0,8                                                                                                                                                                                                                          | 89,3                                                                                                                                                                                                                         | 0,8                                                                                                                                                                                                                               | 1,7                                                                                                                   |
| Region 28                         | 51752                                                                                                                                                   | 41919                                                                                                                                            | 81,0                                                                                                                                                                                                                        | 81,0                                                                                                                                                                                                                        | 0,8                                                                                                                                                                                                                              | 51752                                                                                                                                                            | 42747                                                                                                                                             | 82,6                                                                                                                                                                                                                         | 82,6                                                                                                                                                                                                                         | 0,8                                                                                                                                                                                                                               | 1,6                                                                                                                   |
| Region 29                         | 1345                                                                                                                                                    | 1197                                                                                                                                             | 89                                                                                                                                                                                                                          | 89,0                                                                                                                                                                                                                        | 0,8                                                                                                                                                                                                                              | 1345                                                                                                                                                             | 1237                                                                                                                                              | 92                                                                                                                                                                                                                           | 92,0                                                                                                                                                                                                                         | 0,9                                                                                                                                                                                                                               | 1,7                                                                                                                   |
| Region 30                         | 9                                                                                                                                                       | 3                                                                                                                                                | 33,30                                                                                                                                                                                                                       | 33,3                                                                                                                                                                                                                        | 0,3                                                                                                                                                                                                                              | 3                                                                                                                                                                | 0                                                                                                                                                 | 0                                                                                                                                                                                                                            | 0,0                                                                                                                                                                                                                          | 0                                                                                                                                                                                                                                 | 0,3                                                                                                                   |
| Region 31                         | 120                                                                                                                                                     | 105                                                                                                                                              | 87,5                                                                                                                                                                                                                        | 87,5                                                                                                                                                                                                                        | 0,8                                                                                                                                                                                                                              | 120                                                                                                                                                              | 78                                                                                                                                                | 65                                                                                                                                                                                                                           | 65,0                                                                                                                                                                                                                         | 0,6                                                                                                                                                                                                                               | 1,4                                                                                                                   |
| Region 32                         | 1000                                                                                                                                                    | 980                                                                                                                                              | 0,9                                                                                                                                                                                                                         | 98,0                                                                                                                                                                                                                        | 0,9                                                                                                                                                                                                                              | 1000                                                                                                                                                             | 920                                                                                                                                               | 0,9                                                                                                                                                                                                                          | 92,0                                                                                                                                                                                                                         | 0,9                                                                                                                                                                                                                               | 1,8                                                                                                                   |
| Region 33                         | 43952                                                                                                                                                   | 29009                                                                                                                                            | 0,7                                                                                                                                                                                                                         | 66,0                                                                                                                                                                                                                        | 0,6                                                                                                                                                                                                                              | 17712                                                                                                                                                            | 15658                                                                                                                                             | 0,8                                                                                                                                                                                                                          | 88,4                                                                                                                                                                                                                         | 0,8                                                                                                                                                                                                                               | 1,4                                                                                                                   |
| Region 34                         | 2376                                                                                                                                                    | 2062                                                                                                                                             | 86,8                                                                                                                                                                                                                        | 86,8                                                                                                                                                                                                                        | 0,8                                                                                                                                                                                                                              | 2376                                                                                                                                                             | 2062                                                                                                                                              | 86,8                                                                                                                                                                                                                         | 86,8                                                                                                                                                                                                                         | 0,8                                                                                                                                                                                                                               | 1,6                                                                                                                   |
| Region 35                         | 300                                                                                                                                                     | 153                                                                                                                                              | 51                                                                                                                                                                                                                          | 51,0                                                                                                                                                                                                                        | 0,5                                                                                                                                                                                                                              | 300                                                                                                                                                              | 153                                                                                                                                               | 51                                                                                                                                                                                                                           | 51,0                                                                                                                                                                                                                         | 0,5                                                                                                                                                                                                                               | 1                                                                                                                     |
| Region 36                         | 120399                                                                                                                                                  | 31542                                                                                                                                            | 0,2                                                                                                                                                                                                                         | 26,2                                                                                                                                                                                                                        | 0,2                                                                                                                                                                                                                              | 120399                                                                                                                                                           | 88857                                                                                                                                             | 0,7                                                                                                                                                                                                                          | 73,8                                                                                                                                                                                                                         | 0,7                                                                                                                                                                                                                               | 0,9                                                                                                                   |
| Region 37                         | 1219                                                                                                                                                    | 1206                                                                                                                                             | 98,9                                                                                                                                                                                                                        | 98,9                                                                                                                                                                                                                        | 0,9                                                                                                                                                                                                                              | 1219                                                                                                                                                             | 1206                                                                                                                                              | 98,9                                                                                                                                                                                                                         | 98,9                                                                                                                                                                                                                         | 0,9                                                                                                                                                                                                                               | 1,8                                                                                                                   |
| Region 38                         | 3155                                                                                                                                                    | 3101                                                                                                                                             | 98,29                                                                                                                                                                                                                       | 98,3                                                                                                                                                                                                                        | 0,9                                                                                                                                                                                                                              | 3155                                                                                                                                                             | 3101                                                                                                                                              | 98,29                                                                                                                                                                                                                        | 98,3                                                                                                                                                                                                                         | 0,9                                                                                                                                                                                                                               | 1,8                                                                                                                   |
| Region 39                         | 62386                                                                                                                                                   | 58462                                                                                                                                            | 93,7                                                                                                                                                                                                                        | 93,7                                                                                                                                                                                                                        | 0,9                                                                                                                                                                                                                              | 65928                                                                                                                                                            | 59864                                                                                                                                             | 90,8                                                                                                                                                                                                                         | 90,8                                                                                                                                                                                                                         | 0,9                                                                                                                                                                                                                               | 1,8                                                                                                                   |
| Region 40                         | 2763                                                                                                                                                    | 1936                                                                                                                                             | 70,07                                                                                                                                                                                                                       | 70,1                                                                                                                                                                                                                        | 0,7                                                                                                                                                                                                                              | 2763                                                                                                                                                             | 2030                                                                                                                                              | 73,47                                                                                                                                                                                                                        | 73,5                                                                                                                                                                                                                         | 0,7                                                                                                                                                                                                                               | 1,4                                                                                                                   |
| Region 41                         | 7064                                                                                                                                                    | 4309                                                                                                                                             | 61                                                                                                                                                                                                                          | 61,0                                                                                                                                                                                                                        | 0,6                                                                                                                                                                                                                              | 6940                                                                                                                                                             | 3262                                                                                                                                              | 47                                                                                                                                                                                                                           | 47,0                                                                                                                                                                                                                         | 0,4                                                                                                                                                                                                                               | 1                                                                                                                     |
| Region 42                         | 703                                                                                                                                                     | 703                                                                                                                                              | 100                                                                                                                                                                                                                         | 100,0                                                                                                                                                                                                                       | 1                                                                                                                                                                                                                                | 703                                                                                                                                                              | 703                                                                                                                                               | 100                                                                                                                                                                                                                          | 100,0                                                                                                                                                                                                                        | 1                                                                                                                                                                                                                                 | 2                                                                                                                     |
| Region 43                         | 703                                                                                                                                                     | 662                                                                                                                                              | 0,9                                                                                                                                                                                                                         | 94,2                                                                                                                                                                                                                        | 0,9                                                                                                                                                                                                                              | 703                                                                                                                                                              | 648                                                                                                                                               | 0,9                                                                                                                                                                                                                          | 92,2                                                                                                                                                                                                                         | 0,9                                                                                                                                                                                                                               | 1,8                                                                                                                   |
| Region 44                         | 56944                                                                                                                                                   | 34109                                                                                                                                            | 59,9                                                                                                                                                                                                                        | 59,9                                                                                                                                                                                                                        | 0,5                                                                                                                                                                                                                              | 56944                                                                                                                                                            | 34109                                                                                                                                             | 59,9                                                                                                                                                                                                                         | 59,9                                                                                                                                                                                                                         | 0,5                                                                                                                                                                                                                               | 1                                                                                                                     |
| Region 45                         | 8400                                                                                                                                                    | 7163                                                                                                                                             | 0,8                                                                                                                                                                                                                         | 85,3                                                                                                                                                                                                                        | 0,8                                                                                                                                                                                                                              | 8400                                                                                                                                                             | 7875                                                                                                                                              | 0,9                                                                                                                                                                                                                          | 93,8                                                                                                                                                                                                                         | 0,9                                                                                                                                                                                                                               | 1,7                                                                                                                   |
| Region 46                         | 684                                                                                                                                                     | 509                                                                                                                                              | 74                                                                                                                                                                                                                          | 74,4                                                                                                                                                                                                                        | 0,7                                                                                                                                                                                                                              | 684                                                                                                                                                              | 438                                                                                                                                               | 64                                                                                                                                                                                                                           | 64,0                                                                                                                                                                                                                         | 0,6                                                                                                                                                                                                                               | 1,3                                                                                                                   |
| Region 47                         | 705                                                                                                                                                     | 501                                                                                                                                              | 71                                                                                                                                                                                                                          | 71,1                                                                                                                                                                                                                        | 0,7                                                                                                                                                                                                                              | 705                                                                                                                                                              | 501                                                                                                                                               | 71                                                                                                                                                                                                                           | 71,1                                                                                                                                                                                                                         | 0,7                                                                                                                                                                                                                               | 1,4                                                                                                                   |

**Indicators of the regional rehabilitation systems development in Russia (2019)**

| Regions of the Russian Federation | Total number of PwD (their legal representatives) who were interviewed on the quality of the provision of rehabilitation and (or) habilitation services | Number of PwD (their legal representatives) who are satisfied with the quality of the provision of rehabilitation and (or) habilitation services | The share of PwD (their legal representatives) who are satisfied with the quality of the provision of rehabilitation and (or) habilitation services in the total number of interviewed PwD (their legal representatives), % | The share of PwD (their legal representatives) who are satisfied with the quality of the provision of rehabilitation and (or) habilitation services in the total number of interviewed PwD (their legal representatives), % | The share of PwD (their legal representatives) who are satisfied with the quality of the provision of rehabilitation and (or) habilitation services in the total number of interviewed PwD (their legal representatives), points | Total number of PwD (their legal representatives) who were interviewed to evaluate the system for the provision of rehabilitation and (or) habilitation services | Number of PwD (their legal representatives) who evaluate positively the system for the provision of rehabilitation and (or) habilitation services | The share of PwD (their legal representatives) who evaluate positively the system for the provision of rehabilitation and (or) habilitation services in the total number of interviewed PwD (their legal representatives), % | The share of PwD (their legal representatives) who evaluate positively the system for the provision of rehabilitation and (or) habilitation services in the total number of interviewed PwD (their legal representatives), % | The share of PwD (their legal representatives) who evaluate positively the system for the provision of rehabilitation and (or) habilitation services in the total number of interviewed PwD (their legal representatives), points | The satisfaction of PwD (their legal representatives) with rehabilitation or habilitation measures (services), points |
|-----------------------------------|---------------------------------------------------------------------------------------------------------------------------------------------------------|--------------------------------------------------------------------------------------------------------------------------------------------------|-----------------------------------------------------------------------------------------------------------------------------------------------------------------------------------------------------------------------------|-----------------------------------------------------------------------------------------------------------------------------------------------------------------------------------------------------------------------------|----------------------------------------------------------------------------------------------------------------------------------------------------------------------------------------------------------------------------------|------------------------------------------------------------------------------------------------------------------------------------------------------------------|---------------------------------------------------------------------------------------------------------------------------------------------------|------------------------------------------------------------------------------------------------------------------------------------------------------------------------------------------------------------------------------|------------------------------------------------------------------------------------------------------------------------------------------------------------------------------------------------------------------------------|-----------------------------------------------------------------------------------------------------------------------------------------------------------------------------------------------------------------------------------|-----------------------------------------------------------------------------------------------------------------------|
| Region 48                         | 17785                                                                                                                                                   | 17660                                                                                                                                            | 99,3                                                                                                                                                                                                                        | 99,3                                                                                                                                                                                                                        | 0,9                                                                                                                                                                                                                              | 17785                                                                                                                                                            | 17322                                                                                                                                             | 97,4                                                                                                                                                                                                                         | 97,4                                                                                                                                                                                                                         | 0,9                                                                                                                                                                                                                               | 1,8                                                                                                                   |
| Region 49                         | 41351                                                                                                                                                   | 41351                                                                                                                                            | 1                                                                                                                                                                                                                           | 100,0                                                                                                                                                                                                                       | 1                                                                                                                                                                                                                                | 41351                                                                                                                                                            | 41351                                                                                                                                             | 1                                                                                                                                                                                                                            | 100,0                                                                                                                                                                                                                        | 1                                                                                                                                                                                                                                 | 2                                                                                                                     |
| Region 50                         | 13750                                                                                                                                                   | 8845                                                                                                                                             | 64,3                                                                                                                                                                                                                        | 64,3                                                                                                                                                                                                                        | 0,6                                                                                                                                                                                                                              | 13750                                                                                                                                                            | 8845                                                                                                                                              | 64,3                                                                                                                                                                                                                         | 64,3                                                                                                                                                                                                                         | 0,6                                                                                                                                                                                                                               | 1,2                                                                                                                   |
| Region 51                         | 500                                                                                                                                                     | 480                                                                                                                                              | 96,0                                                                                                                                                                                                                        | 96,0                                                                                                                                                                                                                        | 0,9                                                                                                                                                                                                                              | 255                                                                                                                                                              | 255                                                                                                                                               | 100,0                                                                                                                                                                                                                        | 100,0                                                                                                                                                                                                                        | 1                                                                                                                                                                                                                                 | 1,9                                                                                                                   |
| Region 52                         | 2126                                                                                                                                                    | 2126                                                                                                                                             | 100                                                                                                                                                                                                                         | 100,0                                                                                                                                                                                                                       | 1                                                                                                                                                                                                                                | 2126                                                                                                                                                             | 2062                                                                                                                                              | 97                                                                                                                                                                                                                           | 97,0                                                                                                                                                                                                                         | 0,9                                                                                                                                                                                                                               | 1,9                                                                                                                   |
| Region 53                         | 12361                                                                                                                                                   | 10608                                                                                                                                            | 86                                                                                                                                                                                                                          | 85,8                                                                                                                                                                                                                        | 0,8                                                                                                                                                                                                                              | 12361                                                                                                                                                            | 1564                                                                                                                                              | 13                                                                                                                                                                                                                           | 12,7                                                                                                                                                                                                                         | 0,1                                                                                                                                                                                                                               | 0,9                                                                                                                   |
| Region 54                         | 1377                                                                                                                                                    | 1221                                                                                                                                             | 88,67                                                                                                                                                                                                                       | 88,7                                                                                                                                                                                                                        | 0,8                                                                                                                                                                                                                              | 1363                                                                                                                                                             | 1205                                                                                                                                              | 88,41                                                                                                                                                                                                                        | 88,4                                                                                                                                                                                                                         | 0,8                                                                                                                                                                                                                               | 1,6                                                                                                                   |
| Region 55                         | 3740                                                                                                                                                    | 3699                                                                                                                                             | 0,9                                                                                                                                                                                                                         | 98,9                                                                                                                                                                                                                        | 0,9                                                                                                                                                                                                                              | 3740                                                                                                                                                             | 3149                                                                                                                                              | 0,8                                                                                                                                                                                                                          | 84,2                                                                                                                                                                                                                         | 0,8                                                                                                                                                                                                                               | 1,7                                                                                                                   |
| Region 56                         | 18007                                                                                                                                                   | 14409                                                                                                                                            | 80                                                                                                                                                                                                                          | 80,0                                                                                                                                                                                                                        | 0,8                                                                                                                                                                                                                              | 18007                                                                                                                                                            | 14409                                                                                                                                             | 80                                                                                                                                                                                                                           | 80,0                                                                                                                                                                                                                         | 0,8                                                                                                                                                                                                                               | 1,6                                                                                                                   |
| Region 57                         | 33000                                                                                                                                                   | 17094                                                                                                                                            | 51,8                                                                                                                                                                                                                        | 51,8                                                                                                                                                                                                                        | 0,5                                                                                                                                                                                                                              | 33000                                                                                                                                                            | 16995                                                                                                                                             | 51,5                                                                                                                                                                                                                         | 51,5                                                                                                                                                                                                                         | 0,5                                                                                                                                                                                                                               | 1                                                                                                                     |
| Region 58                         | 2678                                                                                                                                                    | 2418                                                                                                                                             | 0,9                                                                                                                                                                                                                         | 90,3                                                                                                                                                                                                                        | 0,9                                                                                                                                                                                                                              | 0                                                                                                                                                                | 0                                                                                                                                                 | 0                                                                                                                                                                                                                            | 0,0                                                                                                                                                                                                                          | 0                                                                                                                                                                                                                                 | 0,9                                                                                                                   |
| Region 59                         | 1952                                                                                                                                                    | 1860                                                                                                                                             | 95,3                                                                                                                                                                                                                        | 95,3                                                                                                                                                                                                                        | 0,9                                                                                                                                                                                                                              | 1952                                                                                                                                                             | 1804                                                                                                                                              | 92,4                                                                                                                                                                                                                         | 92,4                                                                                                                                                                                                                         | 0,9                                                                                                                                                                                                                               | 1,8                                                                                                                   |
| Region 60                         | 13572                                                                                                                                                   | 12214                                                                                                                                            | 90                                                                                                                                                                                                                          | 90,0                                                                                                                                                                                                                        | 0                                                                                                                                                                                                                                | 13572                                                                                                                                                            | 12214                                                                                                                                             | 90                                                                                                                                                                                                                           | 90,0                                                                                                                                                                                                                         | 0                                                                                                                                                                                                                                 | 0                                                                                                                     |
| Region 61                         | 568                                                                                                                                                     | 401                                                                                                                                              | 70,59                                                                                                                                                                                                                       | 70,6                                                                                                                                                                                                                        | 0,7                                                                                                                                                                                                                              | 328                                                                                                                                                              | 120                                                                                                                                               | 36,5                                                                                                                                                                                                                         | 36,6                                                                                                                                                                                                                         | 0,3                                                                                                                                                                                                                               | 1                                                                                                                     |
| Region 62                         |                                                                                                                                                         |                                                                                                                                                  | 95,8                                                                                                                                                                                                                        | 95,8                                                                                                                                                                                                                        | 0,9                                                                                                                                                                                                                              |                                                                                                                                                                  |                                                                                                                                                   | 99,3                                                                                                                                                                                                                         | 99,3                                                                                                                                                                                                                         | 0,9                                                                                                                                                                                                                               | 1,8                                                                                                                   |
| Region 63                         | 500                                                                                                                                                     | 178                                                                                                                                              | 35,6                                                                                                                                                                                                                        | 35,6                                                                                                                                                                                                                        | 0,3                                                                                                                                                                                                                              | 500                                                                                                                                                              | 153                                                                                                                                               | 30,6                                                                                                                                                                                                                         | 30,6                                                                                                                                                                                                                         | 0,3                                                                                                                                                                                                                               | 0,6                                                                                                                   |
| Region 64                         | 0                                                                                                                                                       | 0                                                                                                                                                | 0                                                                                                                                                                                                                           | 0,0                                                                                                                                                                                                                         | 0                                                                                                                                                                                                                                | 0                                                                                                                                                                | 0                                                                                                                                                 | 0                                                                                                                                                                                                                            | 0,0                                                                                                                                                                                                                          | 0                                                                                                                                                                                                                                 | 0                                                                                                                     |
| Region 65                         | 500                                                                                                                                                     | 445                                                                                                                                              | 89                                                                                                                                                                                                                          | 89,0                                                                                                                                                                                                                        | 0,8                                                                                                                                                                                                                              | 500                                                                                                                                                              | 445                                                                                                                                               | 89                                                                                                                                                                                                                           | 89,0                                                                                                                                                                                                                         | 0,8                                                                                                                                                                                                                               | 1,6                                                                                                                   |
| Region 66                         |                                                                                                                                                         |                                                                                                                                                  | 79,8                                                                                                                                                                                                                        | 79,8                                                                                                                                                                                                                        | 0,7                                                                                                                                                                                                                              |                                                                                                                                                                  |                                                                                                                                                   | 80                                                                                                                                                                                                                           | 80,0                                                                                                                                                                                                                         | 0,8                                                                                                                                                                                                                               | 1,5                                                                                                                   |
| Region 67                         | 1100                                                                                                                                                    | 1095                                                                                                                                             | 99,5                                                                                                                                                                                                                        | 99,5                                                                                                                                                                                                                        | 0,9                                                                                                                                                                                                                              | 1100                                                                                                                                                             | 1075                                                                                                                                              | 97,7                                                                                                                                                                                                                         | 97,7                                                                                                                                                                                                                         | 0,9                                                                                                                                                                                                                               | 1,8                                                                                                                   |
| Region 68                         | 1180                                                                                                                                                    | 876                                                                                                                                              | 74,2                                                                                                                                                                                                                        | 74,2                                                                                                                                                                                                                        | 0,7                                                                                                                                                                                                                              | 1180                                                                                                                                                             | 844                                                                                                                                               | 71,5                                                                                                                                                                                                                         | 71,5                                                                                                                                                                                                                         | 0,7                                                                                                                                                                                                                               | 1,4                                                                                                                   |
| Region 69                         | 2920                                                                                                                                                    | 2920                                                                                                                                             | 100                                                                                                                                                                                                                         | 100,0                                                                                                                                                                                                                       | 1                                                                                                                                                                                                                                | 2920                                                                                                                                                             | 2920                                                                                                                                              | 100                                                                                                                                                                                                                          | 100,0                                                                                                                                                                                                                        | 1                                                                                                                                                                                                                                 | 2                                                                                                                     |
| Region 70                         | 21208                                                                                                                                                   | 21064                                                                                                                                            | 99,32                                                                                                                                                                                                                       | 99,3                                                                                                                                                                                                                        | 0,9                                                                                                                                                                                                                              | 18171                                                                                                                                                            | 18035                                                                                                                                             | 99,25                                                                                                                                                                                                                        | 99,3                                                                                                                                                                                                                         | 0,9                                                                                                                                                                                                                               | 1,8                                                                                                                   |

**Indicators of the regional rehabilitation systems development in Russia (2019)**

| Regions of the Russian Federation | Total number of PwD (their legal representatives) who were interviewed on the quality of the provision of rehabilitation and (or) habilitation services | Number of PwD (their legal representatives) who are satisfied with the quality of the provision of rehabilitation and (or) habilitation services | The share of PwD (their legal representatives) who are satisfied with the quality of the provision of rehabilitation and (or) habilitation services in the total number of interviewed PwD (their legal representatives), % | The share of PwD (their legal representatives) who are satisfied with the quality of the provision of rehabilitation and (or) habilitation services in the total number of interviewed PwD (their legal representatives), % | The share of PwD (their legal representatives) who are satisfied with the quality of the provision of rehabilitation and (or) habilitation services in the total number of interviewed PwD (their legal representatives), points | Total number of PwD (their legal representatives) who were interviewed to evaluate the system for the provision of rehabilitation and (or) habilitation services | Number of PwD (their legal representatives) who evaluate positively the system for the provision of rehabilitation and (or) habilitation services | The share of PwD (their legal representatives) who evaluate positively the system for the provision of rehabilitation and (or) habilitation services in the total number of interviewed PwD (their legal representatives), % | The share of PwD (their legal representatives) who evaluate positively the system for the provision of rehabilitation and (or) habilitation services in the total number of interviewed PwD (their legal representatives), % | The share of PwD (their legal representatives) who evaluate positively the system for the provision of rehabilitation and (or) habilitation services in the total number of interviewed PwD (their legal representatives), points | The satisfaction of PwD (their legal representatives) with rehabilitation or habilitation measures (services), points |
|-----------------------------------|---------------------------------------------------------------------------------------------------------------------------------------------------------|--------------------------------------------------------------------------------------------------------------------------------------------------|-----------------------------------------------------------------------------------------------------------------------------------------------------------------------------------------------------------------------------|-----------------------------------------------------------------------------------------------------------------------------------------------------------------------------------------------------------------------------|----------------------------------------------------------------------------------------------------------------------------------------------------------------------------------------------------------------------------------|------------------------------------------------------------------------------------------------------------------------------------------------------------------|---------------------------------------------------------------------------------------------------------------------------------------------------|------------------------------------------------------------------------------------------------------------------------------------------------------------------------------------------------------------------------------|------------------------------------------------------------------------------------------------------------------------------------------------------------------------------------------------------------------------------|-----------------------------------------------------------------------------------------------------------------------------------------------------------------------------------------------------------------------------------|-----------------------------------------------------------------------------------------------------------------------|
| Region 71                         | 2560                                                                                                                                                    | 2316                                                                                                                                             | 90                                                                                                                                                                                                                          | 90,5                                                                                                                                                                                                                        | 0,9                                                                                                                                                                                                                              | 2560                                                                                                                                                             | 2543                                                                                                                                              | 99,3                                                                                                                                                                                                                         | 99,3                                                                                                                                                                                                                         | 0,9                                                                                                                                                                                                                               | 1,8                                                                                                                   |
| Region 72                         | 2037,0                                                                                                                                                  | 1957,0                                                                                                                                           | 96,1                                                                                                                                                                                                                        | 96,1                                                                                                                                                                                                                        | 0,9                                                                                                                                                                                                                              | 2037,0                                                                                                                                                           | 1930,0                                                                                                                                            | 94,7                                                                                                                                                                                                                         | 94,7                                                                                                                                                                                                                         | 0,9                                                                                                                                                                                                                               | 1,8                                                                                                                   |
| Region 73                         | 1743                                                                                                                                                    | 1602                                                                                                                                             | 91,91                                                                                                                                                                                                                       | 91,9                                                                                                                                                                                                                        | 0,9                                                                                                                                                                                                                              | 1348                                                                                                                                                             | 1221                                                                                                                                              | 90,6                                                                                                                                                                                                                         | 90,6                                                                                                                                                                                                                         | 0,9                                                                                                                                                                                                                               | 1,8                                                                                                                   |
| Region 74                         | 25298                                                                                                                                                   | 24964                                                                                                                                            | 98,7                                                                                                                                                                                                                        | 98,7                                                                                                                                                                                                                        | 0,9                                                                                                                                                                                                                              | 25513                                                                                                                                                            | 24912                                                                                                                                             | 97,6                                                                                                                                                                                                                         | 97,6                                                                                                                                                                                                                         | 0,9                                                                                                                                                                                                                               | 1,8                                                                                                                   |
| Region 75                         | 900                                                                                                                                                     | 895                                                                                                                                              | 99                                                                                                                                                                                                                          | 99,4                                                                                                                                                                                                                        | 0,9                                                                                                                                                                                                                              | 652                                                                                                                                                              | 437                                                                                                                                               | 67                                                                                                                                                                                                                           | 67,0                                                                                                                                                                                                                         | 0,6                                                                                                                                                                                                                               | 1,5                                                                                                                   |
| Region 76                         |                                                                                                                                                         |                                                                                                                                                  | 99,6                                                                                                                                                                                                                        | 99,6                                                                                                                                                                                                                        | 0,9                                                                                                                                                                                                                              |                                                                                                                                                                  |                                                                                                                                                   | 99,6                                                                                                                                                                                                                         | 99,6                                                                                                                                                                                                                         | 0,9                                                                                                                                                                                                                               | 1,8                                                                                                                   |
| Region 77                         | 3436                                                                                                                                                    | 3047                                                                                                                                             | 88,7                                                                                                                                                                                                                        | 88,7                                                                                                                                                                                                                        | 0,8                                                                                                                                                                                                                              | 3436                                                                                                                                                             | 2963                                                                                                                                              | 86,2                                                                                                                                                                                                                         | 86,2                                                                                                                                                                                                                         | 0,8                                                                                                                                                                                                                               | 1,6                                                                                                                   |
| Region 78                         | 219                                                                                                                                                     | 213                                                                                                                                              | 97                                                                                                                                                                                                                          | 97,3                                                                                                                                                                                                                        | 0,9                                                                                                                                                                                                                              | 219                                                                                                                                                              | 213                                                                                                                                               | 97                                                                                                                                                                                                                           | 97,3                                                                                                                                                                                                                         | 0,9                                                                                                                                                                                                                               | 1,8                                                                                                                   |
| Region 79                         | 38 748                                                                                                                                                  | 38 691                                                                                                                                           | 1,00                                                                                                                                                                                                                        | 99,9                                                                                                                                                                                                                        | 0,9                                                                                                                                                                                                                              | 38 748                                                                                                                                                           | 38 691                                                                                                                                            | 1,0                                                                                                                                                                                                                          | 99,9                                                                                                                                                                                                                         | 0,9                                                                                                                                                                                                                               | 1,8                                                                                                                   |
| Region 80                         |                                                                                                                                                         |                                                                                                                                                  | 97                                                                                                                                                                                                                          | 97,0                                                                                                                                                                                                                        | 0,9                                                                                                                                                                                                                              |                                                                                                                                                                  |                                                                                                                                                   | 97                                                                                                                                                                                                                           | 97,0                                                                                                                                                                                                                         | 0,9                                                                                                                                                                                                                               | 1,8                                                                                                                   |
| Region 81                         | 8817                                                                                                                                                    | 8497                                                                                                                                             | 97                                                                                                                                                                                                                          | 96,4                                                                                                                                                                                                                        | 0,9                                                                                                                                                                                                                              | 7329                                                                                                                                                             | 7194                                                                                                                                              | 98                                                                                                                                                                                                                           | 98,2                                                                                                                                                                                                                         | 0,9                                                                                                                                                                                                                               | 1,8                                                                                                                   |
| Region 82                         | 4050                                                                                                                                                    | 3847                                                                                                                                             | 95                                                                                                                                                                                                                          | 95,0                                                                                                                                                                                                                        | 0,9                                                                                                                                                                                                                              | 4050                                                                                                                                                             | 3766                                                                                                                                              | 93                                                                                                                                                                                                                           | 93,0                                                                                                                                                                                                                         | 0,9                                                                                                                                                                                                                               | 1,8                                                                                                                   |
| Region 83                         | 0                                                                                                                                                       | 0                                                                                                                                                | 0,1                                                                                                                                                                                                                         | 0,1                                                                                                                                                                                                                         | 0                                                                                                                                                                                                                                | 0                                                                                                                                                                | 0                                                                                                                                                 | 0,1                                                                                                                                                                                                                          | 0,1                                                                                                                                                                                                                          | 0                                                                                                                                                                                                                                 | 0                                                                                                                     |
| Region 84                         | 0                                                                                                                                                       | 0                                                                                                                                                | 0                                                                                                                                                                                                                           | 0,0                                                                                                                                                                                                                         | 0                                                                                                                                                                                                                                | 0                                                                                                                                                                | 0                                                                                                                                                 | 0                                                                                                                                                                                                                            | 0,0                                                                                                                                                                                                                          | 0                                                                                                                                                                                                                                 | 0                                                                                                                     |
| Region 85                         | 4466                                                                                                                                                    | 4356                                                                                                                                             | 97,5                                                                                                                                                                                                                        | 97,5                                                                                                                                                                                                                        | 0,9                                                                                                                                                                                                                              | 4636                                                                                                                                                             | 4636                                                                                                                                              | 100                                                                                                                                                                                                                          | 100,0                                                                                                                                                                                                                        | 1                                                                                                                                                                                                                                 | 1,9                                                                                                                   |

**Indicators of the regional rehabilitation systems development in Russia (2019)**

| Regions of the Russian Federation | Total number of professionals providing rehabilitation and (or) habilitation measures for PwD | Number of professionals providing rehabilitation and (or) habilitation measures for PwD, who have updated skills and (or) been trained under programs including application of techniques on rehabilitation and (or) habilitation for PwD | The share of professionals providing rehabilitation and (or) habilitation measures for PwD, who have updated skills and (or) been trained under programs including application of techniques on rehabilitation and (or) habilitation for PwD in the total number of those professionals, % | The share of professionals providing rehabilitation and (or) habilitation measures for PwD, who have updated skills and (or) been trained under programs including application of techniques on rehabilitation and (or) habilitation for PwD in the total number of those professionals, % | The share of professionals providing rehabilitation and (or) habilitation measures for PwD, who have updated skills and (or) been trained under programs including application of techniques on rehabilitation and (or) habilitation for PwD in the total number of those professionals, points | The total number of professionals in educational organizations, who teach professionals providing rehabilitation and (or) habilitation measures | Number of professionals in educational organizations, who have been trained under programs on rehabilitation and habilitation for PwD for the last 5 years and teach professionals providing rehabilitation and (or) habilitation measures | The share of professionals in educational organizations, who have been trained under programs on rehabilitation and for PwD for the last 5 years and teach professionals providing rehabilitation and (or) habilitation measures in the total numbers of those professionals, % | The share of professionals in educational organizations, who have been trained under programs on rehabilitation and for PwD for the last 5 years and teach professionals providing rehabilitation and (or) habilitation measures in the total numbers of those professionals, % | The share of professionals in educational organizations, who have been trained under programs on rehabilitation and habilitation for PwD for the last 5 years and teach professionals providing rehabilitation and (or) habilitation measures in the total numbers of those professionals, points | The staffing of organizations providing rehabilitation and (or) habilitation services with specialists of the appropriate profile based on the needs of PwD in rehabilitation and (or) habilitation services, points |
|-----------------------------------|-----------------------------------------------------------------------------------------------|-------------------------------------------------------------------------------------------------------------------------------------------------------------------------------------------------------------------------------------------|--------------------------------------------------------------------------------------------------------------------------------------------------------------------------------------------------------------------------------------------------------------------------------------------|--------------------------------------------------------------------------------------------------------------------------------------------------------------------------------------------------------------------------------------------------------------------------------------------|-------------------------------------------------------------------------------------------------------------------------------------------------------------------------------------------------------------------------------------------------------------------------------------------------|-------------------------------------------------------------------------------------------------------------------------------------------------|--------------------------------------------------------------------------------------------------------------------------------------------------------------------------------------------------------------------------------------------|---------------------------------------------------------------------------------------------------------------------------------------------------------------------------------------------------------------------------------------------------------------------------------|---------------------------------------------------------------------------------------------------------------------------------------------------------------------------------------------------------------------------------------------------------------------------------|---------------------------------------------------------------------------------------------------------------------------------------------------------------------------------------------------------------------------------------------------------------------------------------------------|----------------------------------------------------------------------------------------------------------------------------------------------------------------------------------------------------------------------|
| Region 1                          | 2610                                                                                          | 897                                                                                                                                                                                                                                       | 34,4                                                                                                                                                                                                                                                                                       | 34,4                                                                                                                                                                                                                                                                                       | 0,3                                                                                                                                                                                                                                                                                             | 5                                                                                                                                               | 5                                                                                                                                                                                                                                          | 1                                                                                                                                                                                                                                                                               | 100,0                                                                                                                                                                                                                                                                           | 1                                                                                                                                                                                                                                                                                                 | 1,3                                                                                                                                                                                                                  |
| Region 2                          | 631                                                                                           | 255                                                                                                                                                                                                                                       | 40,4                                                                                                                                                                                                                                                                                       | 40,4                                                                                                                                                                                                                                                                                       | 0,5                                                                                                                                                                                                                                                                                             | 22                                                                                                                                              | 22                                                                                                                                                                                                                                         | 100                                                                                                                                                                                                                                                                             | 100,0                                                                                                                                                                                                                                                                           | 1                                                                                                                                                                                                                                                                                                 | 1,5                                                                                                                                                                                                                  |
| Region 3                          | 1240                                                                                          | 620                                                                                                                                                                                                                                       | 0,5                                                                                                                                                                                                                                                                                        | 50,0                                                                                                                                                                                                                                                                                       | 0,5                                                                                                                                                                                                                                                                                             | 26                                                                                                                                              | 13                                                                                                                                                                                                                                         | 0,5                                                                                                                                                                                                                                                                             | 50,0                                                                                                                                                                                                                                                                            | 0,5                                                                                                                                                                                                                                                                                               | 1                                                                                                                                                                                                                    |
| Region 4                          | 13502                                                                                         | 13502                                                                                                                                                                                                                                     | 100                                                                                                                                                                                                                                                                                        | 100,0                                                                                                                                                                                                                                                                                      | 1                                                                                                                                                                                                                                                                                               | 0                                                                                                                                               | 0                                                                                                                                                                                                                                          | 0                                                                                                                                                                                                                                                                               | 0,0                                                                                                                                                                                                                                                                             | 0                                                                                                                                                                                                                                                                                                 | 1                                                                                                                                                                                                                    |
| Region 5                          | 7402                                                                                          | 3803                                                                                                                                                                                                                                      | 51,4                                                                                                                                                                                                                                                                                       | 51,4                                                                                                                                                                                                                                                                                       | 0,5                                                                                                                                                                                                                                                                                             | 699                                                                                                                                             | 6                                                                                                                                                                                                                                          | 0,9                                                                                                                                                                                                                                                                             | 0,9                                                                                                                                                                                                                                                                             | 0                                                                                                                                                                                                                                                                                                 | 0,5                                                                                                                                                                                                                  |
| Region 6                          | 429                                                                                           | 236                                                                                                                                                                                                                                       | 55                                                                                                                                                                                                                                                                                         | 55,0                                                                                                                                                                                                                                                                                       | 0,5                                                                                                                                                                                                                                                                                             | 473                                                                                                                                             | 473                                                                                                                                                                                                                                        | 100                                                                                                                                                                                                                                                                             | 100,0                                                                                                                                                                                                                                                                           | 1                                                                                                                                                                                                                                                                                                 | 1,5                                                                                                                                                                                                                  |
| Region 7                          | 890                                                                                           | 426                                                                                                                                                                                                                                       | 0,5                                                                                                                                                                                                                                                                                        | 47,9                                                                                                                                                                                                                                                                                       | 0,5                                                                                                                                                                                                                                                                                             | 89                                                                                                                                              | 61                                                                                                                                                                                                                                         | 68,5                                                                                                                                                                                                                                                                            | 68,5                                                                                                                                                                                                                                                                            | 0,7                                                                                                                                                                                                                                                                                               | 1,2                                                                                                                                                                                                                  |
| Region 8                          | 2690                                                                                          | 1129                                                                                                                                                                                                                                      | 42                                                                                                                                                                                                                                                                                         | 42,0                                                                                                                                                                                                                                                                                       | 0,5                                                                                                                                                                                                                                                                                             | 62                                                                                                                                              | 59                                                                                                                                                                                                                                         | 95,2                                                                                                                                                                                                                                                                            | 95,2                                                                                                                                                                                                                                                                            | 1                                                                                                                                                                                                                                                                                                 | 1,5                                                                                                                                                                                                                  |
| Region 9                          | 1979                                                                                          | 625                                                                                                                                                                                                                                       | 31,6                                                                                                                                                                                                                                                                                       | 31,6                                                                                                                                                                                                                                                                                       | 0,3                                                                                                                                                                                                                                                                                             | 200                                                                                                                                             | 200                                                                                                                                                                                                                                        | 100,0                                                                                                                                                                                                                                                                           | 100,0                                                                                                                                                                                                                                                                           | 1                                                                                                                                                                                                                                                                                                 | 1,3                                                                                                                                                                                                                  |
| Region 10                         | 2313,5                                                                                        | 738                                                                                                                                                                                                                                       | 31,9                                                                                                                                                                                                                                                                                       | 31,9                                                                                                                                                                                                                                                                                       | 0,3                                                                                                                                                                                                                                                                                             | 198                                                                                                                                             | 0                                                                                                                                                                                                                                          | 0                                                                                                                                                                                                                                                                               | 0,0                                                                                                                                                                                                                                                                             | 0                                                                                                                                                                                                                                                                                                 | 0,3                                                                                                                                                                                                                  |
| Region 11                         | 12000                                                                                         | 7300                                                                                                                                                                                                                                      | 0,6                                                                                                                                                                                                                                                                                        | 60,8                                                                                                                                                                                                                                                                                       | 0,7                                                                                                                                                                                                                                                                                             |                                                                                                                                                 |                                                                                                                                                                                                                                            |                                                                                                                                                                                                                                                                                 | 0,0                                                                                                                                                                                                                                                                             | 0                                                                                                                                                                                                                                                                                                 | 0,7                                                                                                                                                                                                                  |
| Region 12                         | 162                                                                                           | 130                                                                                                                                                                                                                                       | 80                                                                                                                                                                                                                                                                                         | 80,2                                                                                                                                                                                                                                                                                       | 0,8                                                                                                                                                                                                                                                                                             | 688                                                                                                                                             | 240                                                                                                                                                                                                                                        | 35                                                                                                                                                                                                                                                                              | 34,9                                                                                                                                                                                                                                                                            | 0,3                                                                                                                                                                                                                                                                                               | 1,1                                                                                                                                                                                                                  |

**Indicators of the regional rehabilitation systems development in Russia (2019)**

| Regions of the Russian Federation | Total number of professionals providing rehabilitation and (or) habilitation measures for PwD | Number of professionals providing rehabilitation and (or) habilitation measures for PwD, who have updated skills and (or) been trained under programs including application of techniques on rehabilitation and (or) habilitation for PwD | The share of professionals providing rehabilitation and (or) habilitation measures for PwD, who have updated skills and (or) been trained under programs including application of techniques on rehabilitation and (or) habilitation for PwD in the total number of those professionals, % | The share of professionals providing rehabilitation and (or) habilitation measures for PwD, who have updated skills and (or) been trained under programs including application of techniques on rehabilitation and (or) habilitation for PwD in the total number of those professionals, % | The share of professionals providing rehabilitation and (or) habilitation measures for PwD, who have updated skills and been trained under programs including application of techniques on rehabilitation and (or) habilitation for PwD in the total number of those professionals, points | The total number of professionals in educational organizations, who teach professionals providing rehabilitation and (or) habilitation measures | Number of professionals in educational organizations, who have been trained under programs on rehabilitation and habilitation for PwD for the last 5 years and teach professionals providing rehabilitation and (or) habilitation measures | The share of professionals in educational organizations, who have been trained under programs on rehabilitation and for PwD for the last 5 years and teach professionals providing rehabilitation and (or) habilitation measures in the total numbers of those professionals, % | The share of professionals in educational organizations, who have been trained under programs on rehabilitation and for PwD for the last 5 years and teach professionals providing rehabilitation and (or) habilitation measures in the total numbers of those professionals, % | The share of professionals in educational organizations, who have been trained under programs on rehabilitation and habilitation for PwD for the last 5 years and teach professionals providing rehabilitation and (or) habilitation measures in the total numbers of those professionals, points | The staffing of organizations providing rehabilitation and (or) habilitation services with specialists of the appropriate profile based on the needs of PwD in rehabilitation and (or) habilitation services, points |
|-----------------------------------|-----------------------------------------------------------------------------------------------|-------------------------------------------------------------------------------------------------------------------------------------------------------------------------------------------------------------------------------------------|--------------------------------------------------------------------------------------------------------------------------------------------------------------------------------------------------------------------------------------------------------------------------------------------|--------------------------------------------------------------------------------------------------------------------------------------------------------------------------------------------------------------------------------------------------------------------------------------------|--------------------------------------------------------------------------------------------------------------------------------------------------------------------------------------------------------------------------------------------------------------------------------------------|-------------------------------------------------------------------------------------------------------------------------------------------------|--------------------------------------------------------------------------------------------------------------------------------------------------------------------------------------------------------------------------------------------|---------------------------------------------------------------------------------------------------------------------------------------------------------------------------------------------------------------------------------------------------------------------------------|---------------------------------------------------------------------------------------------------------------------------------------------------------------------------------------------------------------------------------------------------------------------------------|---------------------------------------------------------------------------------------------------------------------------------------------------------------------------------------------------------------------------------------------------------------------------------------------------|----------------------------------------------------------------------------------------------------------------------------------------------------------------------------------------------------------------------|
| Region 13                         | 6692                                                                                          | 6692                                                                                                                                                                                                                                      | 100,0                                                                                                                                                                                                                                                                                      | 100,0                                                                                                                                                                                                                                                                                      | 1                                                                                                                                                                                                                                                                                          |                                                                                                                                                 |                                                                                                                                                                                                                                            |                                                                                                                                                                                                                                                                                 | 0,0                                                                                                                                                                                                                                                                             | 0                                                                                                                                                                                                                                                                                                 | 1                                                                                                                                                                                                                    |
| Region 14                         | 2513                                                                                          | 2270                                                                                                                                                                                                                                      | 90,3                                                                                                                                                                                                                                                                                       | 90,3                                                                                                                                                                                                                                                                                       | 1                                                                                                                                                                                                                                                                                          | 1600                                                                                                                                            | 300                                                                                                                                                                                                                                        | 18,8                                                                                                                                                                                                                                                                            | 18,8                                                                                                                                                                                                                                                                            | 0,2                                                                                                                                                                                                                                                                                               | 1,2                                                                                                                                                                                                                  |
| Region 15                         | 776                                                                                           | 217                                                                                                                                                                                                                                       | 0,28                                                                                                                                                                                                                                                                                       | 28,0                                                                                                                                                                                                                                                                                       | 0,3                                                                                                                                                                                                                                                                                        | 14285                                                                                                                                           | 10000                                                                                                                                                                                                                                      | 0,70                                                                                                                                                                                                                                                                            | 70,0                                                                                                                                                                                                                                                                            | 0,8                                                                                                                                                                                                                                                                                               | 1,1                                                                                                                                                                                                                  |
| Region 16                         | 3933                                                                                          | 722                                                                                                                                                                                                                                       | 18,3                                                                                                                                                                                                                                                                                       | 18,4                                                                                                                                                                                                                                                                                       | 0,2                                                                                                                                                                                                                                                                                        | 66                                                                                                                                              | 13                                                                                                                                                                                                                                         | 20                                                                                                                                                                                                                                                                              | 19,7                                                                                                                                                                                                                                                                            | 0,2                                                                                                                                                                                                                                                                                               | 0,4                                                                                                                                                                                                                  |
| Region 17                         | 2934                                                                                          | 1836                                                                                                                                                                                                                                      | 62,58                                                                                                                                                                                                                                                                                      | 62,6                                                                                                                                                                                                                                                                                       | 0,7                                                                                                                                                                                                                                                                                        | 87                                                                                                                                              | 82                                                                                                                                                                                                                                         | 94,25                                                                                                                                                                                                                                                                           | 94,3                                                                                                                                                                                                                                                                            | 1                                                                                                                                                                                                                                                                                                 | 1,7                                                                                                                                                                                                                  |
| Region 18                         | 3622                                                                                          | 254                                                                                                                                                                                                                                       | 7                                                                                                                                                                                                                                                                                          | 7,0                                                                                                                                                                                                                                                                                        | 0,1                                                                                                                                                                                                                                                                                        | 10                                                                                                                                              |                                                                                                                                                                                                                                            |                                                                                                                                                                                                                                                                                 | 0,0                                                                                                                                                                                                                                                                             | 0                                                                                                                                                                                                                                                                                                 | 0,1                                                                                                                                                                                                                  |
| Region 19                         | 1904                                                                                          | 1580                                                                                                                                                                                                                                      | 0,8                                                                                                                                                                                                                                                                                        | 83,0                                                                                                                                                                                                                                                                                       | 0,8                                                                                                                                                                                                                                                                                        | 18                                                                                                                                              | 6                                                                                                                                                                                                                                          | 0,3                                                                                                                                                                                                                                                                             | 33,3                                                                                                                                                                                                                                                                            | 0,3                                                                                                                                                                                                                                                                                               | 1,1                                                                                                                                                                                                                  |
| Region 20                         | 1537                                                                                          | 679                                                                                                                                                                                                                                       | 44,2                                                                                                                                                                                                                                                                                       | 44,2                                                                                                                                                                                                                                                                                       | 0,5                                                                                                                                                                                                                                                                                        | 150                                                                                                                                             | 100                                                                                                                                                                                                                                        | 66,7                                                                                                                                                                                                                                                                            | 66,7                                                                                                                                                                                                                                                                            | 0,7                                                                                                                                                                                                                                                                                               | 1,2                                                                                                                                                                                                                  |
| Region 21                         | 401                                                                                           | 67                                                                                                                                                                                                                                        | 16,7                                                                                                                                                                                                                                                                                       | 16,7                                                                                                                                                                                                                                                                                       | 0,2                                                                                                                                                                                                                                                                                        | 0                                                                                                                                               | 0                                                                                                                                                                                                                                          | 0,0                                                                                                                                                                                                                                                                             | 0,0                                                                                                                                                                                                                                                                             | 0                                                                                                                                                                                                                                                                                                 | 0,2                                                                                                                                                                                                                  |
| Region 22                         | 5660                                                                                          | 1079                                                                                                                                                                                                                                      | 19,1                                                                                                                                                                                                                                                                                       | 19,1                                                                                                                                                                                                                                                                                       | 0,2                                                                                                                                                                                                                                                                                        | 1505                                                                                                                                            | 1025                                                                                                                                                                                                                                       | 68,1                                                                                                                                                                                                                                                                            | 68,1                                                                                                                                                                                                                                                                            | 0,7                                                                                                                                                                                                                                                                                               | 0,9                                                                                                                                                                                                                  |
| Region 23                         | 546                                                                                           | 235                                                                                                                                                                                                                                       | 43,1                                                                                                                                                                                                                                                                                       | 43,0                                                                                                                                                                                                                                                                                       | 0,5                                                                                                                                                                                                                                                                                        | 150                                                                                                                                             | 75                                                                                                                                                                                                                                         | 1,8                                                                                                                                                                                                                                                                             | 50,0                                                                                                                                                                                                                                                                            | 0,5                                                                                                                                                                                                                                                                                               | 1                                                                                                                                                                                                                    |
| Region 24                         | 2221                                                                                          | 444                                                                                                                                                                                                                                       | 20                                                                                                                                                                                                                                                                                         | 20,0                                                                                                                                                                                                                                                                                       | 0                                                                                                                                                                                                                                                                                          | 977                                                                                                                                             | 684                                                                                                                                                                                                                                        | 70                                                                                                                                                                                                                                                                              | 70,0                                                                                                                                                                                                                                                                            | 0,8                                                                                                                                                                                                                                                                                               | 0,8                                                                                                                                                                                                                  |

**Indicators of the regional rehabilitation systems development in Russia (2019)**

| Regions of the Russian Federation | Total number of professionals providing rehabilitation and (or) habilitation measures for PwD | Number of professionals providing rehabilitation and (or) habilitation measures for PwD, who have updated skills and (or) been trained under programs including application of techniques on rehabilitation and (or) habilitation for PwD | The share of professionals providing rehabilitation and (or) habilitation measures for PwD, who have updated skills and (or) been trained under programs including application of techniques on rehabilitation and (or) habilitation for PwD in the total number of those professionals, % | The share of professionals providing rehabilitation and (or) habilitation measures for PwD, who have updated skills and (or) been trained under programs including application of techniques on rehabilitation and (or) habilitation for PwD in the total number of those professionals, % | The share of professionals providing rehabilitation and (or) habilitation measures for PwD, who have updated skills and (or) been trained under programs including application of techniques on rehabilitation and (or) habilitation for PwD in the total number of those professionals, points | The total number of professionals in educational organizations, who teach professionals providing rehabilitation and (or) habilitation measures | Number of professionals in educational organizations, who have been trained under programs on rehabilitation and habilitation for PwD for the last 5 years and teach professionals providing rehabilitation and (or) habilitation measures | The share of professionals in educational organizations, who have been trained under programs on rehabilitation and for PwD for the last 5 years and teach professionals providing rehabilitation and (or) habilitation measures in the total numbers of those professionals, % | The share of professionals in educational organizations, who have been trained under programs on rehabilitation and for PwD for the last 5 years and teach professionals providing rehabilitation and (or) habilitation measures in the total numbers of those professionals, % | The share of professionals in educational organizations, who have been trained under programs on rehabilitation and habilitation for PwD for the last 5 years and teach professionals providing rehabilitation and (or) habilitation measures in the total numbers of those professionals, points | The staffing of organizations providing rehabilitation and (or) habilitation services with specialists of the appropriate profile based on the needs of PwD in rehabilitation and (or) habilitation services, points |
|-----------------------------------|-----------------------------------------------------------------------------------------------|-------------------------------------------------------------------------------------------------------------------------------------------------------------------------------------------------------------------------------------------|--------------------------------------------------------------------------------------------------------------------------------------------------------------------------------------------------------------------------------------------------------------------------------------------|--------------------------------------------------------------------------------------------------------------------------------------------------------------------------------------------------------------------------------------------------------------------------------------------|-------------------------------------------------------------------------------------------------------------------------------------------------------------------------------------------------------------------------------------------------------------------------------------------------|-------------------------------------------------------------------------------------------------------------------------------------------------|--------------------------------------------------------------------------------------------------------------------------------------------------------------------------------------------------------------------------------------------|---------------------------------------------------------------------------------------------------------------------------------------------------------------------------------------------------------------------------------------------------------------------------------|---------------------------------------------------------------------------------------------------------------------------------------------------------------------------------------------------------------------------------------------------------------------------------|---------------------------------------------------------------------------------------------------------------------------------------------------------------------------------------------------------------------------------------------------------------------------------------------------|----------------------------------------------------------------------------------------------------------------------------------------------------------------------------------------------------------------------|
| Region 25                         | 353                                                                                           | 103                                                                                                                                                                                                                                       | 29                                                                                                                                                                                                                                                                                         | 29,2                                                                                                                                                                                                                                                                                       | 0,3                                                                                                                                                                                                                                                                                             | 4875                                                                                                                                            | 400                                                                                                                                                                                                                                        | 8                                                                                                                                                                                                                                                                               | 8,2                                                                                                                                                                                                                                                                             | 0,1                                                                                                                                                                                                                                                                                               | 0,4                                                                                                                                                                                                                  |
| Region 26                         | 10104                                                                                         | 2446                                                                                                                                                                                                                                      | 0,3                                                                                                                                                                                                                                                                                        | 24,2                                                                                                                                                                                                                                                                                       | 0,3                                                                                                                                                                                                                                                                                             | 15                                                                                                                                              | 15                                                                                                                                                                                                                                         | 1                                                                                                                                                                                                                                                                               | 100,0                                                                                                                                                                                                                                                                           | 1                                                                                                                                                                                                                                                                                                 | 1,3                                                                                                                                                                                                                  |
| Region 27                         | 15814                                                                                         | 3371                                                                                                                                                                                                                                      | 0,30                                                                                                                                                                                                                                                                                       | 21,3                                                                                                                                                                                                                                                                                       | 0,3                                                                                                                                                                                                                                                                                             | 14463                                                                                                                                           | 12918                                                                                                                                                                                                                                      | 0,8                                                                                                                                                                                                                                                                             | 89,3                                                                                                                                                                                                                                                                            | 0,8                                                                                                                                                                                                                                                                                               | 1,1                                                                                                                                                                                                                  |
| Region 28                         | 1321                                                                                          | 502                                                                                                                                                                                                                                       | 38,00                                                                                                                                                                                                                                                                                      | 38,0                                                                                                                                                                                                                                                                                       | 0,3                                                                                                                                                                                                                                                                                             | 1004                                                                                                                                            | 682                                                                                                                                                                                                                                        | 67,9                                                                                                                                                                                                                                                                            | 67,9                                                                                                                                                                                                                                                                            | 0,7                                                                                                                                                                                                                                                                                               | 1                                                                                                                                                                                                                    |
| Region 29                         | 2204                                                                                          | 715                                                                                                                                                                                                                                       | 33                                                                                                                                                                                                                                                                                         | 32,4                                                                                                                                                                                                                                                                                       | 0,3                                                                                                                                                                                                                                                                                             | 19                                                                                                                                              | 19                                                                                                                                                                                                                                         | 100                                                                                                                                                                                                                                                                             | 100,0                                                                                                                                                                                                                                                                           | 1                                                                                                                                                                                                                                                                                                 | 1,3                                                                                                                                                                                                                  |
| Region 30                         | 704                                                                                           | 90                                                                                                                                                                                                                                        | 12,8                                                                                                                                                                                                                                                                                       | 12,8                                                                                                                                                                                                                                                                                       | 0,2                                                                                                                                                                                                                                                                                             | 1                                                                                                                                               | 0                                                                                                                                                                                                                                          | 0                                                                                                                                                                                                                                                                               | 0,0                                                                                                                                                                                                                                                                             | 0                                                                                                                                                                                                                                                                                                 | 0,2                                                                                                                                                                                                                  |
| Region 31                         | 1590                                                                                          | 209                                                                                                                                                                                                                                       | 13,14                                                                                                                                                                                                                                                                                      | 13,1                                                                                                                                                                                                                                                                                       | 0,2                                                                                                                                                                                                                                                                                             | 161                                                                                                                                             | 65                                                                                                                                                                                                                                         | 40,3                                                                                                                                                                                                                                                                            | 40,4                                                                                                                                                                                                                                                                            | 0,5                                                                                                                                                                                                                                                                                               | 0,7                                                                                                                                                                                                                  |
| Region 32                         | 2620                                                                                          | 380                                                                                                                                                                                                                                       | 0,2                                                                                                                                                                                                                                                                                        | 14,5                                                                                                                                                                                                                                                                                       | 0,2                                                                                                                                                                                                                                                                                             | 4                                                                                                                                               | 2                                                                                                                                                                                                                                          | 0,5                                                                                                                                                                                                                                                                             | 50,0                                                                                                                                                                                                                                                                            | 0,5                                                                                                                                                                                                                                                                                               | 0,7                                                                                                                                                                                                                  |
| Region 33                         |                                                                                               |                                                                                                                                                                                                                                           | 1,00                                                                                                                                                                                                                                                                                       | 1,0                                                                                                                                                                                                                                                                                        | 0                                                                                                                                                                                                                                                                                               |                                                                                                                                                 |                                                                                                                                                                                                                                            | 1,0                                                                                                                                                                                                                                                                             | 1,0                                                                                                                                                                                                                                                                             | 0                                                                                                                                                                                                                                                                                                 | 0                                                                                                                                                                                                                    |
| Region 34                         | 166                                                                                           | 61                                                                                                                                                                                                                                        | 36,7                                                                                                                                                                                                                                                                                       | 36,7                                                                                                                                                                                                                                                                                       | 0,3                                                                                                                                                                                                                                                                                             | 1285                                                                                                                                            | 1089                                                                                                                                                                                                                                       | 84,7                                                                                                                                                                                                                                                                            | 84,7                                                                                                                                                                                                                                                                            | 0,8                                                                                                                                                                                                                                                                                               | 1,1                                                                                                                                                                                                                  |
| Region 35                         | 236                                                                                           | 214                                                                                                                                                                                                                                       | 90,7                                                                                                                                                                                                                                                                                       | 90,7                                                                                                                                                                                                                                                                                       | 1                                                                                                                                                                                                                                                                                               | 0                                                                                                                                               | 0                                                                                                                                                                                                                                          | 0                                                                                                                                                                                                                                                                               | 0,0                                                                                                                                                                                                                                                                             | 0                                                                                                                                                                                                                                                                                                 | 1                                                                                                                                                                                                                    |
| Region 36                         | 13710                                                                                         | 2497                                                                                                                                                                                                                                      | 0,2                                                                                                                                                                                                                                                                                        | 18,2                                                                                                                                                                                                                                                                                       | 0,2                                                                                                                                                                                                                                                                                             | 4747                                                                                                                                            | 3233                                                                                                                                                                                                                                       | 0,8                                                                                                                                                                                                                                                                             | 68,1                                                                                                                                                                                                                                                                            | 0,7                                                                                                                                                                                                                                                                                               | 0,9                                                                                                                                                                                                                  |

**Indicators of the regional rehabilitation systems development in Russia (2019)**

| Regions of the Russian Federation | Total number of professionals providing rehabilitation and (or) habilitation measures for PwD | Number of professionals providing rehabilitation and (or) habilitation measures for PwD, who have updated skills and (or) been trained under programs including application of techniques on rehabilitation and (or) habilitation for PwD | The share of professionals providing rehabilitation and (or) habilitation measures for PwD, who have updated skills and (or) been trained under programs including application of techniques on rehabilitation and (or) habilitation for PwD in the total number of those professionals, % | The share of professionals providing rehabilitation and (or) habilitation measures for PwD, who have updated skills and (or) been trained under programs including application of techniques on rehabilitation and (or) habilitation for PwD in the total number of those professionals, % | The share of professionals providing rehabilitation and (or) habilitation measures for PwD, who have updated skills and (or) been trained under programs including application of techniques on rehabilitation and (or) habilitation for PwD in the total number of those professionals, points | The total number of professionals in educational organizations, who teach professionals providing rehabilitation and (or) habilitation measures | Number of professionals in educational organizations, who have been trained under programs on rehabilitation and habilitation for PwD for the last 5 years and teach professionals providing rehabilitation and (or) habilitation measures | The share of professionals in educational organizations, who have been trained under programs on rehabilitation and for PwD for the last 5 years and teach professionals providing rehabilitation and (or) habilitation measures in the total numbers of those professionals, % | The share of professionals in educational organizations, who have been trained under programs on rehabilitation and for PwD for the last 5 years and teach professionals providing rehabilitation and (or) habilitation measures in the total numbers of those professionals, % | The share of professionals in educational organizations, who have been trained under programs on rehabilitation and habilitation for PwD for the last 5 years and teach professionals providing rehabilitation and (or) habilitation measures in the total numbers of those professionals, points | The staffing of organizations providing rehabilitation and (or) habilitation services with specialists of the appropriate profile based on the needs of PwD in rehabilitation and (or) habilitation services, points |
|-----------------------------------|-----------------------------------------------------------------------------------------------|-------------------------------------------------------------------------------------------------------------------------------------------------------------------------------------------------------------------------------------------|--------------------------------------------------------------------------------------------------------------------------------------------------------------------------------------------------------------------------------------------------------------------------------------------|--------------------------------------------------------------------------------------------------------------------------------------------------------------------------------------------------------------------------------------------------------------------------------------------|-------------------------------------------------------------------------------------------------------------------------------------------------------------------------------------------------------------------------------------------------------------------------------------------------|-------------------------------------------------------------------------------------------------------------------------------------------------|--------------------------------------------------------------------------------------------------------------------------------------------------------------------------------------------------------------------------------------------|---------------------------------------------------------------------------------------------------------------------------------------------------------------------------------------------------------------------------------------------------------------------------------|---------------------------------------------------------------------------------------------------------------------------------------------------------------------------------------------------------------------------------------------------------------------------------|---------------------------------------------------------------------------------------------------------------------------------------------------------------------------------------------------------------------------------------------------------------------------------------------------|----------------------------------------------------------------------------------------------------------------------------------------------------------------------------------------------------------------------|
| Region 37                         | 5012                                                                                          | 4526                                                                                                                                                                                                                                      | 90,30                                                                                                                                                                                                                                                                                      | 90,3                                                                                                                                                                                                                                                                                       | 1                                                                                                                                                                                                                                                                                               | 50                                                                                                                                              | 50                                                                                                                                                                                                                                         | 100                                                                                                                                                                                                                                                                             | 100,0                                                                                                                                                                                                                                                                           | 1                                                                                                                                                                                                                                                                                                 | 2                                                                                                                                                                                                                    |
| Region 38                         | 1957                                                                                          | 1186                                                                                                                                                                                                                                      | 60,6                                                                                                                                                                                                                                                                                       | 60,6                                                                                                                                                                                                                                                                                       | 0,7                                                                                                                                                                                                                                                                                             | 1580                                                                                                                                            | 1403                                                                                                                                                                                                                                       | 88,8                                                                                                                                                                                                                                                                            | 88,8                                                                                                                                                                                                                                                                            | 0,8                                                                                                                                                                                                                                                                                               | 1,5                                                                                                                                                                                                                  |
| Region 39                         | 7547                                                                                          | 3930                                                                                                                                                                                                                                      | 52                                                                                                                                                                                                                                                                                         | 52,1                                                                                                                                                                                                                                                                                       | 0,5                                                                                                                                                                                                                                                                                             | 985                                                                                                                                             | 985                                                                                                                                                                                                                                        | 100                                                                                                                                                                                                                                                                             | 100,0                                                                                                                                                                                                                                                                           | 1                                                                                                                                                                                                                                                                                                 | 1,5                                                                                                                                                                                                                  |
| Region 40                         | 1693                                                                                          | 76                                                                                                                                                                                                                                        | 4,49                                                                                                                                                                                                                                                                                       | 4,5                                                                                                                                                                                                                                                                                        | 0                                                                                                                                                                                                                                                                                               | 3537                                                                                                                                            | 1417                                                                                                                                                                                                                                       | 40,06                                                                                                                                                                                                                                                                           | 40,1                                                                                                                                                                                                                                                                            | 0,5                                                                                                                                                                                                                                                                                               | 0,5                                                                                                                                                                                                                  |
| Region 41                         | 7593                                                                                          | 2809                                                                                                                                                                                                                                      | 37                                                                                                                                                                                                                                                                                         | 37,0                                                                                                                                                                                                                                                                                       | 0,3                                                                                                                                                                                                                                                                                             | 6986                                                                                                                                            | 3108                                                                                                                                                                                                                                       | 44,5                                                                                                                                                                                                                                                                            | 44,5                                                                                                                                                                                                                                                                            | 0,5                                                                                                                                                                                                                                                                                               | 0,8                                                                                                                                                                                                                  |
| Region 42                         | 174                                                                                           | 122                                                                                                                                                                                                                                       | 70,1                                                                                                                                                                                                                                                                                       | 70,1                                                                                                                                                                                                                                                                                       | 0,8                                                                                                                                                                                                                                                                                             | 1                                                                                                                                               | 1                                                                                                                                                                                                                                          | 100                                                                                                                                                                                                                                                                             | 100,0                                                                                                                                                                                                                                                                           | 1                                                                                                                                                                                                                                                                                                 | 1,8                                                                                                                                                                                                                  |
| Region 43                         | 4138                                                                                          | 1624                                                                                                                                                                                                                                      | 0,3                                                                                                                                                                                                                                                                                        | 39,2                                                                                                                                                                                                                                                                                       | 0,3                                                                                                                                                                                                                                                                                             | 1009                                                                                                                                            | 985                                                                                                                                                                                                                                        | 1                                                                                                                                                                                                                                                                               | 97,6                                                                                                                                                                                                                                                                            | 1                                                                                                                                                                                                                                                                                                 | 1,3                                                                                                                                                                                                                  |
| Region 44                         | 735                                                                                           | 36                                                                                                                                                                                                                                        | 4,9                                                                                                                                                                                                                                                                                        | 4,9                                                                                                                                                                                                                                                                                        | 0                                                                                                                                                                                                                                                                                               | 0                                                                                                                                               | 0                                                                                                                                                                                                                                          | 0                                                                                                                                                                                                                                                                               | 0,0                                                                                                                                                                                                                                                                             | 0                                                                                                                                                                                                                                                                                                 | 0                                                                                                                                                                                                                    |
| Region 45                         | 1592                                                                                          | 1297                                                                                                                                                                                                                                      | 0,8                                                                                                                                                                                                                                                                                        | 81,5                                                                                                                                                                                                                                                                                       | 0,8                                                                                                                                                                                                                                                                                             | 27                                                                                                                                              | 27                                                                                                                                                                                                                                         | 1                                                                                                                                                                                                                                                                               | 100,0                                                                                                                                                                                                                                                                           | 1                                                                                                                                                                                                                                                                                                 | 1,8                                                                                                                                                                                                                  |
| Region 46                         | 112                                                                                           | 39                                                                                                                                                                                                                                        | 34                                                                                                                                                                                                                                                                                         | 34,8                                                                                                                                                                                                                                                                                       | 0,3                                                                                                                                                                                                                                                                                             | 0                                                                                                                                               | 0                                                                                                                                                                                                                                          | 0                                                                                                                                                                                                                                                                               | 0,0                                                                                                                                                                                                                                                                             | 0                                                                                                                                                                                                                                                                                                 | 0,3                                                                                                                                                                                                                  |
| Region 47                         | 369                                                                                           | 303                                                                                                                                                                                                                                       | 82                                                                                                                                                                                                                                                                                         | 82,1                                                                                                                                                                                                                                                                                       | 0,8                                                                                                                                                                                                                                                                                             | 198                                                                                                                                             | 198                                                                                                                                                                                                                                        | 100                                                                                                                                                                                                                                                                             | 100,0                                                                                                                                                                                                                                                                           | 1                                                                                                                                                                                                                                                                                                 | 1,8                                                                                                                                                                                                                  |

**Indicators of the regional rehabilitation systems development in Russia (2019)**

| Regions of the Russian Federation | Total number of professionals providing rehabilitation and (or) habilitation measures for PwD | Number of professionals providing rehabilitation and (or) habilitation measures for PwD, who have updated skills and (or) been trained under programs including application of techniques on rehabilitation and (or) habilitation for PwD | The share of professionals providing rehabilitation and (or) habilitation measures for PwD, who have updated skills and (or) been trained under programs including application of techniques on rehabilitation and (or) habilitation for PwD in the total number of those professionals, % | The share of professionals providing rehabilitation and (or) habilitation measures for PwD, who have updated skills and (or) been trained under programs including application of techniques on rehabilitation and (or) habilitation for PwD in the total number of those professionals, % | The share of professionals providing rehabilitation and (or) habilitation measures for PwD, who have updated skills and (or) been trained under programs including application of techniques on rehabilitation and (or) habilitation for PwD in the total number of those professionals, points | The total number of professionals in educational organizations, who teach professionals providing rehabilitation and (or) habilitation measures | Number of professionals in educational organizations, who have been trained under programs on rehabilitation and habilitation for PwD for the last 5 years and teach professionals providing rehabilitation and (or) habilitation measures | The share of professionals in educational organizations, who have been trained under programs on rehabilitation and for PwD for the last 5 years and teach professionals providing rehabilitation and (or) habilitation measures in the total numbers of those professionals, % | The share of professionals in educational organizations, who have been trained under programs on rehabilitation and for PwD for the last 5 years and teach professionals providing rehabilitation and (or) habilitation measures in the total numbers of those professionals, % | The share of professionals in educational organizations, who have been trained under programs on rehabilitation and habilitation for PwD for the last 5 years and teach professionals providing rehabilitation and (or) habilitation measures in the total numbers of those professionals, points | The staffing of organizations providing rehabilitation and (or) habilitation services with specialists of the appropriate profile based on the needs of PwD in rehabilitation and (or) habilitation services, points |
|-----------------------------------|-----------------------------------------------------------------------------------------------|-------------------------------------------------------------------------------------------------------------------------------------------------------------------------------------------------------------------------------------------|--------------------------------------------------------------------------------------------------------------------------------------------------------------------------------------------------------------------------------------------------------------------------------------------|--------------------------------------------------------------------------------------------------------------------------------------------------------------------------------------------------------------------------------------------------------------------------------------------|-------------------------------------------------------------------------------------------------------------------------------------------------------------------------------------------------------------------------------------------------------------------------------------------------|-------------------------------------------------------------------------------------------------------------------------------------------------|--------------------------------------------------------------------------------------------------------------------------------------------------------------------------------------------------------------------------------------------|---------------------------------------------------------------------------------------------------------------------------------------------------------------------------------------------------------------------------------------------------------------------------------|---------------------------------------------------------------------------------------------------------------------------------------------------------------------------------------------------------------------------------------------------------------------------------|---------------------------------------------------------------------------------------------------------------------------------------------------------------------------------------------------------------------------------------------------------------------------------------------------|----------------------------------------------------------------------------------------------------------------------------------------------------------------------------------------------------------------------|
| Region 48                         | 1190                                                                                          | 709                                                                                                                                                                                                                                       | 59,6                                                                                                                                                                                                                                                                                       | 59,6                                                                                                                                                                                                                                                                                       | 0,5                                                                                                                                                                                                                                                                                             | 30715                                                                                                                                           | 3660                                                                                                                                                                                                                                       | 11,9                                                                                                                                                                                                                                                                            | 11,9                                                                                                                                                                                                                                                                            | 0,2                                                                                                                                                                                                                                                                                               | 0,7                                                                                                                                                                                                                  |
| Region 49                         | 1418                                                                                          | 406                                                                                                                                                                                                                                       | 0,2                                                                                                                                                                                                                                                                                        | 28,6                                                                                                                                                                                                                                                                                       | 0,3                                                                                                                                                                                                                                                                                             | 13                                                                                                                                              | 13                                                                                                                                                                                                                                         | 1,0                                                                                                                                                                                                                                                                             | 100,0                                                                                                                                                                                                                                                                           | 1                                                                                                                                                                                                                                                                                                 | 1,3                                                                                                                                                                                                                  |
| Region 50                         | 2011                                                                                          | 1241                                                                                                                                                                                                                                      | 61,7                                                                                                                                                                                                                                                                                       | 61,7                                                                                                                                                                                                                                                                                       | 0,7                                                                                                                                                                                                                                                                                             | 844                                                                                                                                             | 844                                                                                                                                                                                                                                        | 100,0                                                                                                                                                                                                                                                                           | 100,0                                                                                                                                                                                                                                                                           | 1                                                                                                                                                                                                                                                                                                 | 1,7                                                                                                                                                                                                                  |
| Region 51                         | 123                                                                                           | 70                                                                                                                                                                                                                                        | 56,9                                                                                                                                                                                                                                                                                       | 56,9                                                                                                                                                                                                                                                                                       | 0,5                                                                                                                                                                                                                                                                                             | 0                                                                                                                                               | 0                                                                                                                                                                                                                                          | 0,0                                                                                                                                                                                                                                                                             | 0,0                                                                                                                                                                                                                                                                             | 0                                                                                                                                                                                                                                                                                                 | 0,5                                                                                                                                                                                                                  |
| Region 52                         | 2130                                                                                          | 498                                                                                                                                                                                                                                       | 23,4                                                                                                                                                                                                                                                                                       | 23,4                                                                                                                                                                                                                                                                                       | 0,3                                                                                                                                                                                                                                                                                             | 253                                                                                                                                             | 200                                                                                                                                                                                                                                        | 79,1                                                                                                                                                                                                                                                                            | 79,1                                                                                                                                                                                                                                                                            | 0,8                                                                                                                                                                                                                                                                                               | 1,1                                                                                                                                                                                                                  |
| Region 53                         | 2918                                                                                          | 646                                                                                                                                                                                                                                       | 22                                                                                                                                                                                                                                                                                         | 22,1                                                                                                                                                                                                                                                                                       | 0,3                                                                                                                                                                                                                                                                                             | 22                                                                                                                                              | 5                                                                                                                                                                                                                                          | 23                                                                                                                                                                                                                                                                              | 22,7                                                                                                                                                                                                                                                                            | 0,3                                                                                                                                                                                                                                                                                               | 0,6                                                                                                                                                                                                                  |
| Region 54                         | 3059                                                                                          | 1962                                                                                                                                                                                                                                      | 64,1                                                                                                                                                                                                                                                                                       | 64,1                                                                                                                                                                                                                                                                                       | 0,7                                                                                                                                                                                                                                                                                             | 786                                                                                                                                             | 390                                                                                                                                                                                                                                        | 49,6                                                                                                                                                                                                                                                                            | 49,6                                                                                                                                                                                                                                                                            | 0,5                                                                                                                                                                                                                                                                                               | 1,2                                                                                                                                                                                                                  |
| Region 55                         | 563                                                                                           | 431                                                                                                                                                                                                                                       | 0,7                                                                                                                                                                                                                                                                                        | 76,6                                                                                                                                                                                                                                                                                       | 0,8                                                                                                                                                                                                                                                                                             | 249                                                                                                                                             | 249                                                                                                                                                                                                                                        | 1                                                                                                                                                                                                                                                                               | 100,0                                                                                                                                                                                                                                                                           | 1                                                                                                                                                                                                                                                                                                 | 1,8                                                                                                                                                                                                                  |
| Region 56                         | 1458                                                                                          | 356                                                                                                                                                                                                                                       | 24,4                                                                                                                                                                                                                                                                                       | 24,4                                                                                                                                                                                                                                                                                       | 0,3                                                                                                                                                                                                                                                                                             | 0                                                                                                                                               | 0                                                                                                                                                                                                                                          | 0                                                                                                                                                                                                                                                                               | 0,0                                                                                                                                                                                                                                                                             | 0                                                                                                                                                                                                                                                                                                 | 0,3                                                                                                                                                                                                                  |
| Region 57                         | 9157                                                                                          | 341                                                                                                                                                                                                                                       | 3,7                                                                                                                                                                                                                                                                                        | 3,7                                                                                                                                                                                                                                                                                        | 0                                                                                                                                                                                                                                                                                               | 77                                                                                                                                              | 37                                                                                                                                                                                                                                         | 48,1                                                                                                                                                                                                                                                                            | 48,1                                                                                                                                                                                                                                                                            | 0,5                                                                                                                                                                                                                                                                                               | 0,5                                                                                                                                                                                                                  |
| Region 58                         | 521                                                                                           | 224                                                                                                                                                                                                                                       | 0,4                                                                                                                                                                                                                                                                                        | 43,0                                                                                                                                                                                                                                                                                       | 0,5                                                                                                                                                                                                                                                                                             |                                                                                                                                                 |                                                                                                                                                                                                                                            | 0,8                                                                                                                                                                                                                                                                             | 0,8                                                                                                                                                                                                                                                                             | 0                                                                                                                                                                                                                                                                                                 | 0,5                                                                                                                                                                                                                  |

**Indicators of the regional rehabilitation systems development in Russia (2019)**

| Regions of the Russian Federation | Total number of professionals providing rehabilitation and (or) habilitation measures for PwD | Number of professionals providing rehabilitation and (or) habilitation measures for PwD, who have updated skills and (or) been trained under programs including application of techniques on rehabilitation and (or) habilitation for PwD | The share of professionals providing rehabilitation and (or) habilitation measures for PwD, who have updated skills and (or) been trained under programs including application of techniques on rehabilitation and (or) habilitation for PwD in the total number of those professionals, % | The share of professionals providing rehabilitation and (or) habilitation measures for PwD, who have updated skills and (or) been trained under programs including application of techniques on rehabilitation and (or) habilitation for PwD in the total number of those professionals, % | The share of professionals providing rehabilitation and (or) habilitation measures for PwD, who have updated skills and (or) been trained under programs including application of techniques on rehabilitation and (or) habilitation for PwD in the total number of those professionals, points | The total number of professionals in educational organizations, who teach professionals providing rehabilitation and (or) habilitation measures | Number of professionals in educational organizations, who have been trained under programs on rehabilitation and habilitation for PwD for the last 5 years and teach professionals providing rehabilitation and (or) habilitation measures | The share of professionals in educational organizations, who have been trained under programs on rehabilitation and for PwD for the last 5 years and teach professionals providing rehabilitation and (or) habilitation measures in the total numbers of those professionals, % | The share of professionals in educational organizations, who have been trained under programs on rehabilitation and for PwD for the last 5 years and teach professionals providing rehabilitation and (or) habilitation measures in the total numbers of those professionals, % | The share of professionals in educational organizations, who have been trained under programs on rehabilitation and habilitation for PwD for the last 5 years and teach professionals providing rehabilitation and (or) habilitation measures in the total numbers of those professionals, points | The staffing of organizations providing rehabilitation and (or) habilitation services with specialists of the appropriate profile based on the needs of PwD in rehabilitation and (or) habilitation services, points |
|-----------------------------------|-----------------------------------------------------------------------------------------------|-------------------------------------------------------------------------------------------------------------------------------------------------------------------------------------------------------------------------------------------|--------------------------------------------------------------------------------------------------------------------------------------------------------------------------------------------------------------------------------------------------------------------------------------------|--------------------------------------------------------------------------------------------------------------------------------------------------------------------------------------------------------------------------------------------------------------------------------------------|-------------------------------------------------------------------------------------------------------------------------------------------------------------------------------------------------------------------------------------------------------------------------------------------------|-------------------------------------------------------------------------------------------------------------------------------------------------|--------------------------------------------------------------------------------------------------------------------------------------------------------------------------------------------------------------------------------------------|---------------------------------------------------------------------------------------------------------------------------------------------------------------------------------------------------------------------------------------------------------------------------------|---------------------------------------------------------------------------------------------------------------------------------------------------------------------------------------------------------------------------------------------------------------------------------|---------------------------------------------------------------------------------------------------------------------------------------------------------------------------------------------------------------------------------------------------------------------------------------------------|----------------------------------------------------------------------------------------------------------------------------------------------------------------------------------------------------------------------|
| Region 59                         | 679                                                                                           | 435                                                                                                                                                                                                                                       | 64,1                                                                                                                                                                                                                                                                                       | 64,1                                                                                                                                                                                                                                                                                       | 0,7                                                                                                                                                                                                                                                                                             | 2493                                                                                                                                            | 300                                                                                                                                                                                                                                        | 12,03                                                                                                                                                                                                                                                                           | 12,0                                                                                                                                                                                                                                                                            | 0,2                                                                                                                                                                                                                                                                                               | 0,9                                                                                                                                                                                                                  |
| Region 60                         | 1249                                                                                          | 375                                                                                                                                                                                                                                       | 30                                                                                                                                                                                                                                                                                         | 30,0                                                                                                                                                                                                                                                                                       | 0,3                                                                                                                                                                                                                                                                                             | 1726                                                                                                                                            | 1726                                                                                                                                                                                                                                       | 100                                                                                                                                                                                                                                                                             | 100,0                                                                                                                                                                                                                                                                           | 1                                                                                                                                                                                                                                                                                                 | 1,3                                                                                                                                                                                                                  |
| Region 61                         | 674                                                                                           | 25                                                                                                                                                                                                                                        | 3,7                                                                                                                                                                                                                                                                                        | 3,7                                                                                                                                                                                                                                                                                        | 0                                                                                                                                                                                                                                                                                               | 480                                                                                                                                             | 36                                                                                                                                                                                                                                         | 7,5                                                                                                                                                                                                                                                                             | 7,5                                                                                                                                                                                                                                                                             | 0,1                                                                                                                                                                                                                                                                                               | 0,1                                                                                                                                                                                                                  |
| Region 62                         |                                                                                               |                                                                                                                                                                                                                                           | 32,6                                                                                                                                                                                                                                                                                       | 32,6                                                                                                                                                                                                                                                                                       | 0,3                                                                                                                                                                                                                                                                                             |                                                                                                                                                 |                                                                                                                                                                                                                                            | 100                                                                                                                                                                                                                                                                             | 100,0                                                                                                                                                                                                                                                                           | 1                                                                                                                                                                                                                                                                                                 | 1,3                                                                                                                                                                                                                  |
| Region 63                         | 6004                                                                                          | 1044                                                                                                                                                                                                                                      | 17,4                                                                                                                                                                                                                                                                                       | 17,4                                                                                                                                                                                                                                                                                       | 0,2                                                                                                                                                                                                                                                                                             | 0                                                                                                                                               | 0                                                                                                                                                                                                                                          | 0                                                                                                                                                                                                                                                                               | 0,0                                                                                                                                                                                                                                                                             | 0                                                                                                                                                                                                                                                                                                 | 0,2                                                                                                                                                                                                                  |
| Region 64                         | 1431                                                                                          | 1072                                                                                                                                                                                                                                      | 75                                                                                                                                                                                                                                                                                         | 74,9                                                                                                                                                                                                                                                                                       | 0,8                                                                                                                                                                                                                                                                                             | 0                                                                                                                                               | 0                                                                                                                                                                                                                                          | 0                                                                                                                                                                                                                                                                               | 0,0                                                                                                                                                                                                                                                                             | 0                                                                                                                                                                                                                                                                                                 | 0,8                                                                                                                                                                                                                  |
| Region 65                         | 1755                                                                                          | 1058                                                                                                                                                                                                                                      | 0,5                                                                                                                                                                                                                                                                                        | 60,3                                                                                                                                                                                                                                                                                       | 0,7                                                                                                                                                                                                                                                                                             | 12                                                                                                                                              | 12                                                                                                                                                                                                                                         | 100                                                                                                                                                                                                                                                                             | 100,0                                                                                                                                                                                                                                                                           | 1                                                                                                                                                                                                                                                                                                 | 1,7                                                                                                                                                                                                                  |
| Region 66                         |                                                                                               |                                                                                                                                                                                                                                           | 93                                                                                                                                                                                                                                                                                         | 93,0                                                                                                                                                                                                                                                                                       | 1                                                                                                                                                                                                                                                                                               |                                                                                                                                                 |                                                                                                                                                                                                                                            | 60                                                                                                                                                                                                                                                                              | 60,0                                                                                                                                                                                                                                                                            | 0,7                                                                                                                                                                                                                                                                                               | 1,7                                                                                                                                                                                                                  |
| Region 67                         | 174                                                                                           | 130                                                                                                                                                                                                                                       | 74,7                                                                                                                                                                                                                                                                                       | 74,7                                                                                                                                                                                                                                                                                       | 0,8                                                                                                                                                                                                                                                                                             | 4914                                                                                                                                            | 1990                                                                                                                                                                                                                                       | 40,5                                                                                                                                                                                                                                                                            | 40,5                                                                                                                                                                                                                                                                            | 0,5                                                                                                                                                                                                                                                                                               | 1,3                                                                                                                                                                                                                  |
| Region 68                         | 4540                                                                                          | 3776                                                                                                                                                                                                                                      | 83,2                                                                                                                                                                                                                                                                                       | 83,2                                                                                                                                                                                                                                                                                       | 0,8                                                                                                                                                                                                                                                                                             | 341                                                                                                                                             | 220                                                                                                                                                                                                                                        | 64,5                                                                                                                                                                                                                                                                            | 64,5                                                                                                                                                                                                                                                                            | 0,7                                                                                                                                                                                                                                                                                               | 1,5                                                                                                                                                                                                                  |
| Region 69                         | 1520                                                                                          | 347                                                                                                                                                                                                                                       | 22,8                                                                                                                                                                                                                                                                                       | 22,8                                                                                                                                                                                                                                                                                       | 0,3                                                                                                                                                                                                                                                                                             | 16                                                                                                                                              | 4                                                                                                                                                                                                                                          | 25,0                                                                                                                                                                                                                                                                            | 25,0                                                                                                                                                                                                                                                                            | 0,3                                                                                                                                                                                                                                                                                               | 0,6                                                                                                                                                                                                                  |

**Indicators of the regional rehabilitation systems development in Russia (2019)**

| Regions of the Russian Federation | Total number of professionals providing rehabilitation and (or) habilitation measures for PwD | Number of professionals providing rehabilitation and (or) habilitation measures for PwD, who have updated skills and (or) been trained under programs including application of techniques on rehabilitation and (or) habilitation for PwD | The share of professionals providing rehabilitation and (or) habilitation measures for PwD, who have updated skills and (or) been trained under programs including application of techniques on rehabilitation and (or) habilitation for PwD in the total number of those professionals, % | The share of professionals providing rehabilitation and (or) habilitation measures for PwD, who have updated skills and (or) been trained under programs including application of techniques on rehabilitation and (or) habilitation for PwD in the total number of those professionals, % | The share of professionals providing rehabilitation and (or) habilitation measures for PwD, who have updated skills and (or) been trained under programs including application of techniques on rehabilitation and (or) habilitation for PwD in the total number of those professionals, points | The total number of professionals in educational organizations, who teach professionals providing rehabilitation and (or) habilitation measures | Number of professionals in educational organizations, who have been trained under programs on rehabilitation and habilitation for PwD for the last 5 years and teach professionals providing rehabilitation and (or) habilitation measures | The share of professionals in educational organizations, who have been trained under programs on rehabilitation and for PwD for the last 5 years and teach professionals providing rehabilitation and (or) habilitation measures in the total numbers of those professionals, % | The share of professionals in educational organizations, who have been trained under programs on rehabilitation and for PwD for the last 5 years and teach professionals providing rehabilitation and (or) habilitation measures in the total numbers of those professionals, % | The share of professionals in educational organizations, who have been trained under programs on rehabilitation and habilitation for PwD for the last 5 years and teach professionals providing rehabilitation and (or) habilitation measures in the total numbers of those professionals, points | The staffing of organizations providing rehabilitation and (or) habilitation services with specialists of the appropriate profile based on the needs of PwD in rehabilitation and (or) habilitation services, points |
|-----------------------------------|-----------------------------------------------------------------------------------------------|-------------------------------------------------------------------------------------------------------------------------------------------------------------------------------------------------------------------------------------------|--------------------------------------------------------------------------------------------------------------------------------------------------------------------------------------------------------------------------------------------------------------------------------------------|--------------------------------------------------------------------------------------------------------------------------------------------------------------------------------------------------------------------------------------------------------------------------------------------|-------------------------------------------------------------------------------------------------------------------------------------------------------------------------------------------------------------------------------------------------------------------------------------------------|-------------------------------------------------------------------------------------------------------------------------------------------------|--------------------------------------------------------------------------------------------------------------------------------------------------------------------------------------------------------------------------------------------|---------------------------------------------------------------------------------------------------------------------------------------------------------------------------------------------------------------------------------------------------------------------------------|---------------------------------------------------------------------------------------------------------------------------------------------------------------------------------------------------------------------------------------------------------------------------------|---------------------------------------------------------------------------------------------------------------------------------------------------------------------------------------------------------------------------------------------------------------------------------------------------|----------------------------------------------------------------------------------------------------------------------------------------------------------------------------------------------------------------------|
| Region 70                         | 3817                                                                                          | 2366                                                                                                                                                                                                                                      | 62,0                                                                                                                                                                                                                                                                                       | 62,0                                                                                                                                                                                                                                                                                       | 0,7                                                                                                                                                                                                                                                                                             | 1549                                                                                                                                            | 1127                                                                                                                                                                                                                                       | 72,8                                                                                                                                                                                                                                                                            | 72,8                                                                                                                                                                                                                                                                            | 0,8                                                                                                                                                                                                                                                                                               | 1,5                                                                                                                                                                                                                  |
| Region 71                         | 770                                                                                           | 308                                                                                                                                                                                                                                       | 40                                                                                                                                                                                                                                                                                         | 40,0                                                                                                                                                                                                                                                                                       | 0,5                                                                                                                                                                                                                                                                                             | 416                                                                                                                                             | 139                                                                                                                                                                                                                                        | 33                                                                                                                                                                                                                                                                              | 33,4                                                                                                                                                                                                                                                                            | 0,3                                                                                                                                                                                                                                                                                               | 0,8                                                                                                                                                                                                                  |
| Region 72                         | 823,0                                                                                         | 749,0                                                                                                                                                                                                                                     | 91,0                                                                                                                                                                                                                                                                                       | 91,0                                                                                                                                                                                                                                                                                       | 1                                                                                                                                                                                                                                                                                               | 3,0                                                                                                                                             | 3,0                                                                                                                                                                                                                                        | 100                                                                                                                                                                                                                                                                             | 100,0                                                                                                                                                                                                                                                                           | 1                                                                                                                                                                                                                                                                                                 | 2                                                                                                                                                                                                                    |
| Region 73                         | 1705,75                                                                                       | 292                                                                                                                                                                                                                                       | 17,1                                                                                                                                                                                                                                                                                       | 17,1                                                                                                                                                                                                                                                                                       | 0,2                                                                                                                                                                                                                                                                                             | 9                                                                                                                                               | 9                                                                                                                                                                                                                                          | 100,0                                                                                                                                                                                                                                                                           | 100,0                                                                                                                                                                                                                                                                           | 1                                                                                                                                                                                                                                                                                                 | 1,2                                                                                                                                                                                                                  |
| Region 74                         | 3074                                                                                          | 1895                                                                                                                                                                                                                                      | 61,6                                                                                                                                                                                                                                                                                       | 61,6                                                                                                                                                                                                                                                                                       | 0,7                                                                                                                                                                                                                                                                                             | 4058                                                                                                                                            | 2564                                                                                                                                                                                                                                       | 63,2                                                                                                                                                                                                                                                                            | 63,2                                                                                                                                                                                                                                                                            | 0,7                                                                                                                                                                                                                                                                                               | 1,4                                                                                                                                                                                                                  |
| Region 75                         | 8120                                                                                          | 5657                                                                                                                                                                                                                                      | 70                                                                                                                                                                                                                                                                                         | 69,7                                                                                                                                                                                                                                                                                       | 0,7                                                                                                                                                                                                                                                                                             | 685                                                                                                                                             | 685                                                                                                                                                                                                                                        | 100                                                                                                                                                                                                                                                                             | 100,0                                                                                                                                                                                                                                                                           | 1                                                                                                                                                                                                                                                                                                 | 1,7                                                                                                                                                                                                                  |
| Region 76                         | 5976,5                                                                                        |                                                                                                                                                                                                                                           | 75,0                                                                                                                                                                                                                                                                                       | 0,0                                                                                                                                                                                                                                                                                        | 0                                                                                                                                                                                                                                                                                               |                                                                                                                                                 |                                                                                                                                                                                                                                            | 30,0                                                                                                                                                                                                                                                                            | 30,0                                                                                                                                                                                                                                                                            | 0,3                                                                                                                                                                                                                                                                                               | 0,3                                                                                                                                                                                                                  |
| Region 77                         | 10324                                                                                         | 9394                                                                                                                                                                                                                                      | 91                                                                                                                                                                                                                                                                                         | 91,0                                                                                                                                                                                                                                                                                       | 1                                                                                                                                                                                                                                                                                               | 984                                                                                                                                             | 984                                                                                                                                                                                                                                        | 100                                                                                                                                                                                                                                                                             | 100,0                                                                                                                                                                                                                                                                           | 1                                                                                                                                                                                                                                                                                                 | 2                                                                                                                                                                                                                    |
| Region 78                         | 1399                                                                                          | 894                                                                                                                                                                                                                                       | 63,9                                                                                                                                                                                                                                                                                       | 63,9                                                                                                                                                                                                                                                                                       | 0,7                                                                                                                                                                                                                                                                                             | 463                                                                                                                                             | 283                                                                                                                                                                                                                                        | 61,2                                                                                                                                                                                                                                                                            | 61,1                                                                                                                                                                                                                                                                            | 0,7                                                                                                                                                                                                                                                                                               | 1,4                                                                                                                                                                                                                  |
| Region 79                         | 14469,0                                                                                       | 12676,0                                                                                                                                                                                                                                   | 0,88                                                                                                                                                                                                                                                                                       | 87,6                                                                                                                                                                                                                                                                                       | 0,8                                                                                                                                                                                                                                                                                             | 5840,0                                                                                                                                          | 5126,0                                                                                                                                                                                                                                     | 0,88                                                                                                                                                                                                                                                                            | 87,8                                                                                                                                                                                                                                                                            | 0,8                                                                                                                                                                                                                                                                                               | 1,6                                                                                                                                                                                                                  |
| Region 80                         | 16824                                                                                         | 8934                                                                                                                                                                                                                                      | 53,1                                                                                                                                                                                                                                                                                       | 53,1                                                                                                                                                                                                                                                                                       | 0,5                                                                                                                                                                                                                                                                                             |                                                                                                                                                 |                                                                                                                                                                                                                                            | 98                                                                                                                                                                                                                                                                              | 98,0                                                                                                                                                                                                                                                                            | 1                                                                                                                                                                                                                                                                                                 | 1,5                                                                                                                                                                                                                  |

**Indicators of the regional rehabilitation systems development in Russia (2019)**

| Regions of the Russian Federation | Total number of professionals providing rehabilitation and (or) habilitation measures for PwD | Number of professionals providing rehabilitation and (or) habilitation measures for PwD, who have updated skills and (or) been trained under programs including application of techniques on rehabilitation and (or) habilitation for PwD | The share of professionals providing rehabilitation and (or) habilitation measures for PwD, who have updated skills and (or) been trained under programs including application of techniques on rehabilitation and (or) habilitation for PwD in the total number of those professionals, % | The share of professionals providing rehabilitation and (or) habilitation measures for PwD, who have updated skills and (or) been trained under programs including application of techniques on rehabilitation and (or) habilitation for PwD in the total number of those professionals, % | The share of professionals providing rehabilitation and (or) habilitation measures for PwD, who have updated skills and (or) been trained under programs including application of techniques on rehabilitation and (or) habilitation for PwD in the total number of those professionals, points | The total number of professionals in educational organizations, who teach professionals providing rehabilitation and (or) habilitation measures | Number of professionals in educational organizations, who have been trained under programs on rehabilitation and habilitation for PwD for the last 5 years and teach professionals providing rehabilitation and (or) habilitation measures | The share of professionals in educational organizations, who have been trained under programs on rehabilitation and for PwD for the last 5 years and teach professionals providing rehabilitation and (or) habilitation measures in the total numbers of those professionals, % | The share of professionals in educational organizations, who have been trained under programs on rehabilitation and for PwD for the last 5 years and teach professionals providing rehabilitation and (or) habilitation measures in the total numbers of those professionals, % | The share of professionals in educational organizations, who have been trained under programs on rehabilitation and habilitation for PwD for the last 5 years and teach professionals providing rehabilitation and (or) habilitation measures in the total numbers of those professionals, points | The staffing of organizations providing rehabilitation and (or) habilitation services with specialists of the appropriate profile based on the needs of PwD in rehabilitation and (or) habilitation services, points |
|-----------------------------------|-----------------------------------------------------------------------------------------------|-------------------------------------------------------------------------------------------------------------------------------------------------------------------------------------------------------------------------------------------|--------------------------------------------------------------------------------------------------------------------------------------------------------------------------------------------------------------------------------------------------------------------------------------------|--------------------------------------------------------------------------------------------------------------------------------------------------------------------------------------------------------------------------------------------------------------------------------------------|-------------------------------------------------------------------------------------------------------------------------------------------------------------------------------------------------------------------------------------------------------------------------------------------------|-------------------------------------------------------------------------------------------------------------------------------------------------|--------------------------------------------------------------------------------------------------------------------------------------------------------------------------------------------------------------------------------------------|---------------------------------------------------------------------------------------------------------------------------------------------------------------------------------------------------------------------------------------------------------------------------------|---------------------------------------------------------------------------------------------------------------------------------------------------------------------------------------------------------------------------------------------------------------------------------|---------------------------------------------------------------------------------------------------------------------------------------------------------------------------------------------------------------------------------------------------------------------------------------------------|----------------------------------------------------------------------------------------------------------------------------------------------------------------------------------------------------------------------|
| Region 81                         |                                                                                               |                                                                                                                                                                                                                                           |                                                                                                                                                                                                                                                                                            | 0,0                                                                                                                                                                                                                                                                                        | 0                                                                                                                                                                                                                                                                                               |                                                                                                                                                 |                                                                                                                                                                                                                                            |                                                                                                                                                                                                                                                                                 | 0,0                                                                                                                                                                                                                                                                             | 0                                                                                                                                                                                                                                                                                                 | 0                                                                                                                                                                                                                    |
| Region 82                         | 3091                                                                                          | 2781                                                                                                                                                                                                                                      | 90                                                                                                                                                                                                                                                                                         | 90,0                                                                                                                                                                                                                                                                                       | 0                                                                                                                                                                                                                                                                                               | 86                                                                                                                                              | 86                                                                                                                                                                                                                                         | 100                                                                                                                                                                                                                                                                             | 100,0                                                                                                                                                                                                                                                                           | 1                                                                                                                                                                                                                                                                                                 | 1                                                                                                                                                                                                                    |
| Region 83                         | 567                                                                                           | 0                                                                                                                                                                                                                                         | 0,0                                                                                                                                                                                                                                                                                        | 0,0                                                                                                                                                                                                                                                                                        | 0                                                                                                                                                                                                                                                                                               | 78                                                                                                                                              | 0                                                                                                                                                                                                                                          | 0,0                                                                                                                                                                                                                                                                             | 0,0                                                                                                                                                                                                                                                                             | 0                                                                                                                                                                                                                                                                                                 | 0                                                                                                                                                                                                                    |
| Region 84                         | 2220                                                                                          | 1192                                                                                                                                                                                                                                      | 53,7                                                                                                                                                                                                                                                                                       | 53,7                                                                                                                                                                                                                                                                                       | 0,5                                                                                                                                                                                                                                                                                             | 1086                                                                                                                                            | 980                                                                                                                                                                                                                                        | 90,2                                                                                                                                                                                                                                                                            | 90,2                                                                                                                                                                                                                                                                            | 1                                                                                                                                                                                                                                                                                                 | 1,5                                                                                                                                                                                                                  |
| Region 85                         | 1417                                                                                          | 994                                                                                                                                                                                                                                       | 70,1                                                                                                                                                                                                                                                                                       | 70,1                                                                                                                                                                                                                                                                                       | 0,8                                                                                                                                                                                                                                                                                             | 900                                                                                                                                             | 900                                                                                                                                                                                                                                        | 100                                                                                                                                                                                                                                                                             | 100,0                                                                                                                                                                                                                                                                           | 1                                                                                                                                                                                                                                                                                                 | 1,8                                                                                                                                                                                                                  |

**Indicators of the regional rehabilitation systems development in Russia (2019)**

| Regions of the Russian Federation | Availability of an interagency information system (presence - 1 point, absence - 0 point) | Total number of PwD in the region | Total number of PwD in the region | Number of PwD, whose data are stored in the interagency information system | The share of PwD, whose data are stored in the interagency information system, % | The share of PwD, whose data are stored in the interagency information system, points | Number of organizations providing rehabilitation and (or) habilitation measures in the region | Number of organizations providing rehabilitation and (or) habilitation measures in the regions and connected to the interagency information system | The share of organizations providing rehabilitation and (or) habilitation measures in the regions and connected to the interagency information system in the total number of those organizations, % | The share of organizations providing rehabilitation and (or) habilitation measures in the regions and connected to the interagency information system in the total number of those organizations, points | The share of PwD who received measures that were written in the individual rehabilitation/habilitation programs and determined by the regional agencies in the total number of PWD who received the individual rehabilitation/habilitation programs in the bureaus of medical and social expertise in the assessment period, % | The share of PwD who received measures that were written in the individual rehabilitation/habilitation programs and determined by the regional agencies in the total number of PWD who received the individual rehabilitation/habilitation programs in the bureaus of medical and social expertise in the assessment period, points | The formation of the information base of the regional system, taking into account information about the needs of PwD in rehabilitation and (or) habilitation services, points |
|-----------------------------------|-------------------------------------------------------------------------------------------|-----------------------------------|-----------------------------------|----------------------------------------------------------------------------|----------------------------------------------------------------------------------|---------------------------------------------------------------------------------------|-----------------------------------------------------------------------------------------------|----------------------------------------------------------------------------------------------------------------------------------------------------|-----------------------------------------------------------------------------------------------------------------------------------------------------------------------------------------------------|----------------------------------------------------------------------------------------------------------------------------------------------------------------------------------------------------------|--------------------------------------------------------------------------------------------------------------------------------------------------------------------------------------------------------------------------------------------------------------------------------------------------------------------------------|-------------------------------------------------------------------------------------------------------------------------------------------------------------------------------------------------------------------------------------------------------------------------------------------------------------------------------------|-------------------------------------------------------------------------------------------------------------------------------------------------------------------------------|
| Region 1                          | 0                                                                                         | 173868                            | 182297                            | 0                                                                          | 0,0                                                                              | 0                                                                                     | 0                                                                                             | 0                                                                                                                                                  |                                                                                                                                                                                                     | 0                                                                                                                                                                                                        | 17                                                                                                                                                                                                                                                                                                                             | 0,1                                                                                                                                                                                                                                                                                                                                 | 0,1                                                                                                                                                                           |
| Region 2                          | 0                                                                                         | 64684                             | 68936                             | 0                                                                          | 0,0                                                                              | 0                                                                                     | 55                                                                                            | 0                                                                                                                                                  | 0,0                                                                                                                                                                                                 | 0                                                                                                                                                                                                        | 18                                                                                                                                                                                                                                                                                                                             | 0,1                                                                                                                                                                                                                                                                                                                                 | 0,1                                                                                                                                                                           |
| Region 3                          | 0                                                                                         | 85345                             | 89951                             | 0                                                                          | 0,0                                                                              | 0                                                                                     | 67                                                                                            | 0                                                                                                                                                  | 0,0                                                                                                                                                                                                 | 0                                                                                                                                                                                                        | 0                                                                                                                                                                                                                                                                                                                              | 0                                                                                                                                                                                                                                                                                                                                   | 0                                                                                                                                                                             |
| Region 4                          | 0                                                                                         | 43544                             | 48706                             | 0                                                                          | 0,0                                                                              | 0                                                                                     | 35                                                                                            | 0                                                                                                                                                  | 0,0                                                                                                                                                                                                 | 0                                                                                                                                                                                                        | 1                                                                                                                                                                                                                                                                                                                              | 0                                                                                                                                                                                                                                                                                                                                   | 0                                                                                                                                                                             |
| Region 5                          | 0                                                                                         | 200166                            | 202139                            | 0                                                                          | 0,0                                                                              | 0                                                                                     | 656                                                                                           | 0                                                                                                                                                  | 0,0                                                                                                                                                                                                 | 0                                                                                                                                                                                                        | 10                                                                                                                                                                                                                                                                                                                             | 0,1                                                                                                                                                                                                                                                                                                                                 | 0,1                                                                                                                                                                           |
| Region 6                          | 0                                                                                         | 106248                            | 89883                             | 0                                                                          | 0,0                                                                              | 0                                                                                     | 97                                                                                            | 0                                                                                                                                                  | 0,0                                                                                                                                                                                                 | 0                                                                                                                                                                                                        | 82,1                                                                                                                                                                                                                                                                                                                           | 0,8                                                                                                                                                                                                                                                                                                                                 | 0,8                                                                                                                                                                           |
| Region 7                          | 1                                                                                         | 123325                            | 127167                            | 124266                                                                     | 97,7                                                                             | 0,9                                                                                   | 725                                                                                           | 482                                                                                                                                                | 66,5                                                                                                                                                                                                | 0,6                                                                                                                                                                                                      | 66                                                                                                                                                                                                                                                                                                                             | 0,6                                                                                                                                                                                                                                                                                                                                 | 3,1                                                                                                                                                                           |
| Region 8                          | 1                                                                                         | 172967                            | 172967                            | 38281                                                                      | 22,1                                                                             | 0,2                                                                                   | 169                                                                                           | 104                                                                                                                                                | 61,5                                                                                                                                                                                                | 0,6                                                                                                                                                                                                      | 84,5                                                                                                                                                                                                                                                                                                                           | 0,8                                                                                                                                                                                                                                                                                                                                 | 2,6                                                                                                                                                                           |
| Region 9                          | 1                                                                                         | 94490                             | 99421                             | 77068                                                                      | 77,5                                                                             | 0,7                                                                                   | 128                                                                                           | 95                                                                                                                                                 | 74,2                                                                                                                                                                                                | 0,7                                                                                                                                                                                                      | 56,1                                                                                                                                                                                                                                                                                                                           | 0,5                                                                                                                                                                                                                                                                                                                                 | 2,9                                                                                                                                                                           |
| Region 10                         | 0                                                                                         | 216440                            | 0                                 | 0                                                                          |                                                                                  | 0                                                                                     | 0                                                                                             | 0                                                                                                                                                  |                                                                                                                                                                                                     | 0                                                                                                                                                                                                        | 0                                                                                                                                                                                                                                                                                                                              | 0                                                                                                                                                                                                                                                                                                                                   | 0                                                                                                                                                                             |
| Region 11                         | 1                                                                                         | 572552                            | 587765                            | 0                                                                          | 0,0                                                                              | 0                                                                                     | 532                                                                                           | 532                                                                                                                                                | 100,0                                                                                                                                                                                               | 1                                                                                                                                                                                                        | 1                                                                                                                                                                                                                                                                                                                              | 0                                                                                                                                                                                                                                                                                                                                   | 2                                                                                                                                                                             |
| Region 12                         | 0                                                                                         | 20330                             | 21846                             | 0                                                                          | 0,0                                                                              | 0                                                                                     | 191                                                                                           | 0                                                                                                                                                  | 0,0                                                                                                                                                                                                 | 0                                                                                                                                                                                                        | 54                                                                                                                                                                                                                                                                                                                             | 0,5                                                                                                                                                                                                                                                                                                                                 | 0,5                                                                                                                                                                           |
| Region 13                         | 0                                                                                         | 1009237                           | 1038792                           |                                                                            | 0,0                                                                              | 0                                                                                     | 176                                                                                           | 0                                                                                                                                                  | 0,0                                                                                                                                                                                                 | 0                                                                                                                                                                                                        | 90,7                                                                                                                                                                                                                                                                                                                           | 0,9                                                                                                                                                                                                                                                                                                                                 | 0,9                                                                                                                                                                           |
| Region 14                         | 0                                                                                         | 12604                             | 13378                             | 13378                                                                      | 100,0                                                                            | 1                                                                                     | 326                                                                                           | 135                                                                                                                                                | 41,4                                                                                                                                                                                                | 0,4                                                                                                                                                                                                      | 90,0                                                                                                                                                                                                                                                                                                                           | 0,9                                                                                                                                                                                                                                                                                                                                 | 2,3                                                                                                                                                                           |
| Region 15                         | 1                                                                                         | 77697                             | 80583                             | 70818                                                                      | 87,9                                                                             | 0,8                                                                                   | 9                                                                                             | 6                                                                                                                                                  | 66,7                                                                                                                                                                                                | 0,6                                                                                                                                                                                                      | 1                                                                                                                                                                                                                                                                                                                              | 1                                                                                                                                                                                                                                                                                                                                   | 3,4                                                                                                                                                                           |
| Region 16                         | 1                                                                                         | 77485                             | 77612                             | 0                                                                          | 0,0                                                                              | 0                                                                                     | 95                                                                                            | 0                                                                                                                                                  | 0,0                                                                                                                                                                                                 | 0                                                                                                                                                                                                        | 1                                                                                                                                                                                                                                                                                                                              | 0                                                                                                                                                                                                                                                                                                                                   | 1                                                                                                                                                                             |
| Region 17                         | 0                                                                                         | 208750                            | 216870                            |                                                                            | 0,0                                                                              | 0                                                                                     | 362                                                                                           | 0                                                                                                                                                  | 0,0                                                                                                                                                                                                 | 0                                                                                                                                                                                                        | 625                                                                                                                                                                                                                                                                                                                            | 0                                                                                                                                                                                                                                                                                                                                   | 0                                                                                                                                                                             |
| Region 18                         | 0                                                                                         | 57272                             | 60110                             | 0                                                                          | 0,0                                                                              | 0                                                                                     | 286                                                                                           | 0                                                                                                                                                  | 0,0                                                                                                                                                                                                 | 0                                                                                                                                                                                                        | 15/0,8                                                                                                                                                                                                                                                                                                                         | 0                                                                                                                                                                                                                                                                                                                                   | 0                                                                                                                                                                             |
| Region 19                         | 1                                                                                         | 68514                             | 71750                             | 71750                                                                      | 100,0                                                                            | 1                                                                                     | 406                                                                                           | 53                                                                                                                                                 | 13,1                                                                                                                                                                                                | 0,1                                                                                                                                                                                                      | 70                                                                                                                                                                                                                                                                                                                             | 0,7                                                                                                                                                                                                                                                                                                                                 | 2,8                                                                                                                                                                           |
| Region 20                         | 1                                                                                         | 76764                             | 76814                             | 60201                                                                      | 78,4                                                                             | 0,7                                                                                   | 115                                                                                           | 60                                                                                                                                                 | 52,2                                                                                                                                                                                                | 0,5                                                                                                                                                                                                      | 80,1                                                                                                                                                                                                                                                                                                                           | 0,8                                                                                                                                                                                                                                                                                                                                 | 3                                                                                                                                                                             |
| Region 21                         | 1                                                                                         | 13495                             | 13495                             | 13495                                                                      | 100,0                                                                            | 1                                                                                     | 57                                                                                            | 0                                                                                                                                                  | 0,0                                                                                                                                                                                                 | 0                                                                                                                                                                                                        | 55                                                                                                                                                                                                                                                                                                                             | 0,5                                                                                                                                                                                                                                                                                                                                 | 2,5                                                                                                                                                                           |
| Region 22                         | 1                                                                                         | 51342                             | 52219                             | 22780                                                                      | 43,6                                                                             | 0,4                                                                                   | 190                                                                                           | 56                                                                                                                                                 | 29,5                                                                                                                                                                                                | 0,2                                                                                                                                                                                                      | 116991                                                                                                                                                                                                                                                                                                                         | 0                                                                                                                                                                                                                                                                                                                                   | 1,6                                                                                                                                                                           |
| Region 23                         | 0                                                                                         | 218438                            | 218438                            | 0                                                                          | 0,0                                                                              | 0                                                                                     | 0                                                                                             | 42                                                                                                                                                 |                                                                                                                                                                                                     | 0                                                                                                                                                                                                        | 182                                                                                                                                                                                                                                                                                                                            | 0                                                                                                                                                                                                                                                                                                                                   | 0                                                                                                                                                                             |
| Region 24                         | 1                                                                                         | 121221                            | 124580                            | 101859                                                                     | 81,8                                                                             | 0,8                                                                                   | 187                                                                                           | 49                                                                                                                                                 | 26,2                                                                                                                                                                                                | 0,2                                                                                                                                                                                                      | 17                                                                                                                                                                                                                                                                                                                             | 0,1                                                                                                                                                                                                                                                                                                                                 | 2,1                                                                                                                                                                           |
| Region 25                         | 0                                                                                         | 58727                             | 61046                             | 0                                                                          | 0,0                                                                              | 0                                                                                     | 125                                                                                           | 0                                                                                                                                                  | 0,0                                                                                                                                                                                                 | 0                                                                                                                                                                                                        | 1                                                                                                                                                                                                                                                                                                                              | 0                                                                                                                                                                                                                                                                                                                                   | 0                                                                                                                                                                             |
| Region 26                         | 1                                                                                         | 429956                            | 449350                            | 104756                                                                     | 23,3                                                                             | 0,2                                                                                   | 195                                                                                           | 165                                                                                                                                                | 84,6                                                                                                                                                                                                | 0,8                                                                                                                                                                                                      | 0,61                                                                                                                                                                                                                                                                                                                           | 0                                                                                                                                                                                                                                                                                                                                   | 2                                                                                                                                                                             |
| Region 27                         | 0                                                                                         | 180865                            | 194676                            | 0                                                                          | 0,0                                                                              | 0                                                                                     | 1751                                                                                          | 0                                                                                                                                                  | 0,0                                                                                                                                                                                                 | 0                                                                                                                                                                                                        | 1                                                                                                                                                                                                                                                                                                                              | 0                                                                                                                                                                                                                                                                                                                                   | 0                                                                                                                                                                             |
| Region 28                         | 1                                                                                         | 72569                             | 76493                             | 35860                                                                      | 46,9                                                                             | 0,4                                                                                   | 101                                                                                           | 99                                                                                                                                                 | 98,0                                                                                                                                                                                                | 0,9                                                                                                                                                                                                      | 1                                                                                                                                                                                                                                                                                                                              | 0                                                                                                                                                                                                                                                                                                                                   | 2,3                                                                                                                                                                           |
| Region 29                         | 0                                                                                         | 119036                            | 123877                            | 0                                                                          | 0,0                                                                              | 0                                                                                     | 36                                                                                            | 0                                                                                                                                                  | 0,0                                                                                                                                                                                                 | 0                                                                                                                                                                                                        | 10                                                                                                                                                                                                                                                                                                                             | 0,1                                                                                                                                                                                                                                                                                                                                 | 0,1                                                                                                                                                                           |
| Region 30                         | 1                                                                                         | 134924                            | 140259                            | 140259                                                                     | 100,0                                                                            | 1                                                                                     | 551                                                                                           | 551                                                                                                                                                | 100,0                                                                                                                                                                                               | 1                                                                                                                                                                                                        | 80                                                                                                                                                                                                                                                                                                                             | 0,8                                                                                                                                                                                                                                                                                                                                 | 3,8                                                                                                                                                                           |
| Region 31                         | 1                                                                                         | 115966                            | 120302                            | 16604                                                                      | 13,8                                                                             | 0,1                                                                                   | 76                                                                                            | 40                                                                                                                                                 | 52,6                                                                                                                                                                                                | 0,5                                                                                                                                                                                                      | 72,05                                                                                                                                                                                                                                                                                                                          | 0,7                                                                                                                                                                                                                                                                                                                                 | 2,3                                                                                                                                                                           |
| Region 32                         | 0                                                                                         | 4992                              | 5538                              | 0                                                                          | 0,0                                                                              | 0                                                                                     | 50                                                                                            | 0                                                                                                                                                  | 0,0                                                                                                                                                                                                 | 0                                                                                                                                                                                                        | 1                                                                                                                                                                                                                                                                                                                              | 0                                                                                                                                                                                                                                                                                                                                   | 0                                                                                                                                                                             |
| Region 33                         | 1                                                                                         | 418741                            | 422788                            | 422788                                                                     | 100,0                                                                            | 1                                                                                     | 1249                                                                                          | 1112                                                                                                                                               | 89,0                                                                                                                                                                                                | 0,8                                                                                                                                                                                                      | 1                                                                                                                                                                                                                                                                                                                              | 0                                                                                                                                                                                                                                                                                                                                   | 2,8                                                                                                                                                                           |

**Indicators of the regional rehabilitation systems development in Russia (2019)**

| Regions of the Russian Federation | Availability of an interagency information system (presence - 1 point, absence - 0 point) | Total number of PwD in the region | Total number of PwD in the region | Number of PwD, whose data are stored in the interagency information system | The share of PwD, whose data are stored in the interagency information system, % | The share of PwD, whose data are stored in the interagency information system, points | Number of organizations providing rehabilitation and (or) habilitation measures in the region | Number of organizations providing rehabilitation and (or) habilitation measures in the regions and connected to the interagency information system | The share of organizations providing rehabilitation and (or) habilitation measures in the regions and connected to the interagency information system in the total number of those organizations, % | The share of organizations providing rehabilitation and (or) habilitation measures in the regions and connected to the interagency information system in the total number of those organizations, points | The share of PwD who received measures that were written in the individual rehabilitation/habilitation programs and determined by the regional agencies in the total number of PwD who received the individual rehabilitation/habilitation programs in the bureaus of medical and social expertise in the assessment period, % | The share of PwD who received measures that were written in the individual rehabilitation/habilitation programs and determined by the regional agencies in the total number of PwD who received the individual rehabilitation/habilitation programs in the bureaus of medical and social expertise in the assessment period, points | The formation of the information base of the regional system, taking into account information about the needs of PwD in rehabilitation and (or) habilitation services, points |
|-----------------------------------|-------------------------------------------------------------------------------------------|-----------------------------------|-----------------------------------|----------------------------------------------------------------------------|----------------------------------------------------------------------------------|---------------------------------------------------------------------------------------|-----------------------------------------------------------------------------------------------|----------------------------------------------------------------------------------------------------------------------------------------------------|-----------------------------------------------------------------------------------------------------------------------------------------------------------------------------------------------------|----------------------------------------------------------------------------------------------------------------------------------------------------------------------------------------------------------|--------------------------------------------------------------------------------------------------------------------------------------------------------------------------------------------------------------------------------------------------------------------------------------------------------------------------------|-------------------------------------------------------------------------------------------------------------------------------------------------------------------------------------------------------------------------------------------------------------------------------------------------------------------------------------|-------------------------------------------------------------------------------------------------------------------------------------------------------------------------------|
| Region 34                         | 0                                                                                         | 28434                             | 31162                             | 0                                                                          | 0,0                                                                              | 0                                                                                     | 464                                                                                           | 0                                                                                                                                                  | 0,0                                                                                                                                                                                                 | 0                                                                                                                                                                                                        | 32                                                                                                                                                                                                                                                                                                                             | 0,3                                                                                                                                                                                                                                                                                                                                 | 0,3                                                                                                                                                                           |
| Region 35                         | 0                                                                                         | 2939                              | 2935                              | 0                                                                          | 0,0                                                                              | 0                                                                                     | 33                                                                                            | 0                                                                                                                                                  | 0,0                                                                                                                                                                                                 | 0                                                                                                                                                                                                        | 100                                                                                                                                                                                                                                                                                                                            | 1                                                                                                                                                                                                                                                                                                                                   | 1                                                                                                                                                                             |
| Region 36                         | 0                                                                                         | 285372                            | 285434                            | 0                                                                          | 0,0                                                                              | 0                                                                                     | 3892                                                                                          | 0                                                                                                                                                  | 0,0                                                                                                                                                                                                 | 0                                                                                                                                                                                                        | 1                                                                                                                                                                                                                                                                                                                              | 0                                                                                                                                                                                                                                                                                                                                   | 0                                                                                                                                                                             |
| Region 37                         | 0                                                                                         | 56772                             | 59209                             | 0                                                                          | 0,0                                                                              | 0                                                                                     | 321                                                                                           | 0                                                                                                                                                  | 0,0                                                                                                                                                                                                 | 0                                                                                                                                                                                                        | 91,9                                                                                                                                                                                                                                                                                                                           | 0,9                                                                                                                                                                                                                                                                                                                                 | 0,9                                                                                                                                                                           |
| Region 38                         | 1                                                                                         | 182920                            | 192741                            | 151351                                                                     | 78,5                                                                             | 0,7                                                                                   | 73                                                                                            | 43                                                                                                                                                 | 58,9                                                                                                                                                                                                | 0,5                                                                                                                                                                                                      | 73                                                                                                                                                                                                                                                                                                                             | 0,7                                                                                                                                                                                                                                                                                                                                 | 2,9                                                                                                                                                                           |
| Region 39                         | 1                                                                                         | 125695                            | 132432                            | 38006                                                                      | 28,7                                                                             | 0,2                                                                                   | 916                                                                                           | 162                                                                                                                                                | 17,7                                                                                                                                                                                                | 0,1                                                                                                                                                                                                      | 19 (1 балл)                                                                                                                                                                                                                                                                                                                    | 0                                                                                                                                                                                                                                                                                                                                   | 1,3                                                                                                                                                                           |
| Region 40                         | 0                                                                                         | 187122                            | 194308                            | 0                                                                          | 0,0                                                                              | 0                                                                                     | 174                                                                                           | 0                                                                                                                                                  | 0,0                                                                                                                                                                                                 | 0                                                                                                                                                                                                        | 0,9218                                                                                                                                                                                                                                                                                                                         | 0                                                                                                                                                                                                                                                                                                                                   | 0                                                                                                                                                                             |
| Region 41                         | 0                                                                                         | 60705                             | 63592                             | 0                                                                          | 0,0                                                                              | 0                                                                                     | 153                                                                                           | 0                                                                                                                                                  | 0,0                                                                                                                                                                                                 | 0                                                                                                                                                                                                        | 18                                                                                                                                                                                                                                                                                                                             | 0,1                                                                                                                                                                                                                                                                                                                                 | 0,1                                                                                                                                                                           |
| Region 42                         | 0                                                                                         | 95861                             | 96137                             | 0                                                                          | 0,0                                                                              | 0                                                                                     | 5                                                                                             | 0                                                                                                                                                  | 0,0                                                                                                                                                                                                 | 0                                                                                                                                                                                                        | 1                                                                                                                                                                                                                                                                                                                              | 0                                                                                                                                                                                                                                                                                                                                   | 0                                                                                                                                                                             |
| Region 43                         | 1                                                                                         | 200434                            | 200706                            | 0                                                                          | 0,0                                                                              | 0                                                                                     | 1022                                                                                          | 0                                                                                                                                                  | 0,0                                                                                                                                                                                                 | 0                                                                                                                                                                                                        | 1                                                                                                                                                                                                                                                                                                                              | 0                                                                                                                                                                                                                                                                                                                                   | 1                                                                                                                                                                             |
| Region 44                         | 0                                                                                         | 108475                            | 113888                            | 0                                                                          | 0,0                                                                              | 0                                                                                     | 88                                                                                            | 0                                                                                                                                                  | 0,0                                                                                                                                                                                                 | 0                                                                                                                                                                                                        | 57                                                                                                                                                                                                                                                                                                                             | 0,5                                                                                                                                                                                                                                                                                                                                 | 0,5                                                                                                                                                                           |
| Region 45                         | 1                                                                                         | 47563                             | 47653                             | 47653                                                                      | 100,0                                                                            | 1                                                                                     | 313                                                                                           | 118                                                                                                                                                | 37,7                                                                                                                                                                                                | 0,3                                                                                                                                                                                                      | 15 и более                                                                                                                                                                                                                                                                                                                     | 0                                                                                                                                                                                                                                                                                                                                   | 2,3                                                                                                                                                                           |
| Region 46                         | 0                                                                                         | 33063                             | 35096                             | 0                                                                          | 0,0                                                                              | 0                                                                                     | 6                                                                                             | 0                                                                                                                                                  | 0,0                                                                                                                                                                                                 | 0                                                                                                                                                                                                        | 1                                                                                                                                                                                                                                                                                                                              | 0                                                                                                                                                                                                                                                                                                                                   | 0                                                                                                                                                                             |
| Region 47                         | 0                                                                                         | 21310                             | 22646                             | 0                                                                          | 0,0                                                                              | 0                                                                                     | 34                                                                                            | 0                                                                                                                                                  | 0,0                                                                                                                                                                                                 | 0                                                                                                                                                                                                        | 0,8                                                                                                                                                                                                                                                                                                                            | 0                                                                                                                                                                                                                                                                                                                                   | 0                                                                                                                                                                             |
| Region 48                         | 0                                                                                         | 249893                            | 267071                            | 0                                                                          | 0,0                                                                              | 0                                                                                     | 83                                                                                            | 0                                                                                                                                                  | 0,0                                                                                                                                                                                                 | 0                                                                                                                                                                                                        | 0,5                                                                                                                                                                                                                                                                                                                            | 0                                                                                                                                                                                                                                                                                                                                   | 0                                                                                                                                                                             |
| Region 49                         | 0                                                                                         | 74795                             | 79003                             | 0                                                                          | 0,0                                                                              | 0                                                                                     | 65                                                                                            | 0                                                                                                                                                  | 0,0                                                                                                                                                                                                 | 0                                                                                                                                                                                                        | 0,5                                                                                                                                                                                                                                                                                                                            | 0,5                                                                                                                                                                                                                                                                                                                                 | 0,5                                                                                                                                                                           |
| Region 50                         | 0                                                                                         | 302080                            | 335414                            | 0                                                                          | 0,0                                                                              | 0                                                                                     | 199                                                                                           | 0                                                                                                                                                  | 0,0                                                                                                                                                                                                 | 0                                                                                                                                                                                                        | 100,0                                                                                                                                                                                                                                                                                                                          | 1                                                                                                                                                                                                                                                                                                                                   | 1                                                                                                                                                                             |
| Region 51                         | 0                                                                                         | 57338                             | 72588                             | 0                                                                          | 0,0                                                                              | 0                                                                                     | 5                                                                                             | 0                                                                                                                                                  | 0,0                                                                                                                                                                                                 | 0                                                                                                                                                                                                        | 100,0                                                                                                                                                                                                                                                                                                                          | 1                                                                                                                                                                                                                                                                                                                                   | 1                                                                                                                                                                             |
| Region 52                         | 0                                                                                         | 21392                             | 23080                             | 0                                                                          | 0,0                                                                              | 0                                                                                     | 242                                                                                           | 0                                                                                                                                                  | 0,0                                                                                                                                                                                                 | 0                                                                                                                                                                                                        | 43                                                                                                                                                                                                                                                                                                                             | 0,4                                                                                                                                                                                                                                                                                                                                 | 0,4                                                                                                                                                                           |
| Region 53                         | 0                                                                                         | 60874                             | 63493                             | 0                                                                          | 0,0                                                                              | 0                                                                                     | 174                                                                                           | 0                                                                                                                                                  | 0,0                                                                                                                                                                                                 | 0                                                                                                                                                                                                        | 100                                                                                                                                                                                                                                                                                                                            | 1                                                                                                                                                                                                                                                                                                                                   | 1                                                                                                                                                                             |
| Region 54                         | 0                                                                                         | 61803                             | 65415                             | 0                                                                          | 0,0                                                                              | 0                                                                                     | 980                                                                                           | 0                                                                                                                                                  | 0,0                                                                                                                                                                                                 | 0                                                                                                                                                                                                        | 60,55                                                                                                                                                                                                                                                                                                                          | 0,6                                                                                                                                                                                                                                                                                                                                 | 0,6                                                                                                                                                                           |
| Region 55                         | 0                                                                                         | 124025                            | 130917                            | 0                                                                          | 0,0                                                                              | 0                                                                                     | 37                                                                                            | 0                                                                                                                                                  | 0,0                                                                                                                                                                                                 | 0                                                                                                                                                                                                        | 0,5                                                                                                                                                                                                                                                                                                                            | 0                                                                                                                                                                                                                                                                                                                                   | 0                                                                                                                                                                             |
| Region 56                         | 1                                                                                         | 62203                             | 61709                             | 11766                                                                      | 19,1                                                                             | 0,1                                                                                   | 473                                                                                           | 473                                                                                                                                                | 100,0                                                                                                                                                                                               | 1                                                                                                                                                                                                        | 43                                                                                                                                                                                                                                                                                                                             | 0,4                                                                                                                                                                                                                                                                                                                                 | 2,5                                                                                                                                                                           |
| Region 57                         | 1                                                                                         | 68787                             | 71180                             | 10977                                                                      | 15,4                                                                             | 0,1                                                                                   | 354                                                                                           | 64                                                                                                                                                 | 18,1                                                                                                                                                                                                | 0,1                                                                                                                                                                                                      | 1428                                                                                                                                                                                                                                                                                                                           | 0                                                                                                                                                                                                                                                                                                                                   | 1,2                                                                                                                                                                           |
| Region 58                         | 1                                                                                         | 53195                             | 59751                             | 17562                                                                      | 29,4                                                                             | 0,2                                                                                   | 129                                                                                           | 73                                                                                                                                                 | 56,6                                                                                                                                                                                                | 0,5                                                                                                                                                                                                      | нет данных                                                                                                                                                                                                                                                                                                                     | 0                                                                                                                                                                                                                                                                                                                                   | 1,7                                                                                                                                                                           |
| Region 59                         | 0                                                                                         | 62571                             | 65068                             | 0                                                                          | 0,0                                                                              | 0                                                                                     | 64                                                                                            | 0                                                                                                                                                  | 0,0                                                                                                                                                                                                 | 0                                                                                                                                                                                                        | 1                                                                                                                                                                                                                                                                                                                              | 0                                                                                                                                                                                                                                                                                                                                   | 0                                                                                                                                                                             |
| Region 60                         | 1                                                                                         | 282302                            | 297977                            | 265200                                                                     | 89,0                                                                             | 0,8                                                                                   | 322                                                                                           | 290                                                                                                                                                | 90,1                                                                                                                                                                                                | 0,9                                                                                                                                                                                                      | 13                                                                                                                                                                                                                                                                                                                             | 0,1                                                                                                                                                                                                                                                                                                                                 | 2,8                                                                                                                                                                           |
| Region 61                         | 1                                                                                         | 20936                             | 23547                             | 18720                                                                      | 79,5                                                                             | 0,7                                                                                   | 254                                                                                           | 180                                                                                                                                                | 70,9                                                                                                                                                                                                | 0,7                                                                                                                                                                                                      | 74,98                                                                                                                                                                                                                                                                                                                          | 0,7                                                                                                                                                                                                                                                                                                                                 | 3,1                                                                                                                                                                           |
| Region 62                         | 0                                                                                         | 27406                             |                                   | 0                                                                          |                                                                                  | 0                                                                                     |                                                                                               | 0                                                                                                                                                  |                                                                                                                                                                                                     | 0                                                                                                                                                                                                        | 0,50                                                                                                                                                                                                                                                                                                                           | 0                                                                                                                                                                                                                                                                                                                                   | 0                                                                                                                                                                             |
| Region 63                         | 0                                                                                         | 349741                            | 361647                            | 0                                                                          | 0,0                                                                              | 0                                                                                     | 355                                                                                           | 0                                                                                                                                                  | 0,0                                                                                                                                                                                                 | 0                                                                                                                                                                                                        | 85,5                                                                                                                                                                                                                                                                                                                           | 0,8                                                                                                                                                                                                                                                                                                                                 | 0,8                                                                                                                                                                           |
| Region 64                         | 0                                                                                         | 130525                            | 133549                            | 0                                                                          | 0,0                                                                              | 0                                                                                     | 178                                                                                           | 0                                                                                                                                                  | 0,0                                                                                                                                                                                                 | 0                                                                                                                                                                                                        | 12                                                                                                                                                                                                                                                                                                                             | 0,1                                                                                                                                                                                                                                                                                                                                 | 0,1                                                                                                                                                                           |
| Region 65                         | 1                                                                                         | 209593                            | 227292                            | 0                                                                          | 0,0                                                                              | 0                                                                                     | 108                                                                                           | 5                                                                                                                                                  | 4,6                                                                                                                                                                                                 | 0                                                                                                                                                                                                        | 1,02                                                                                                                                                                                                                                                                                                                           | 0                                                                                                                                                                                                                                                                                                                                   | 1                                                                                                                                                                             |
| Region 66                         | 0                                                                                         | 135760                            | 143600                            | 0                                                                          | 0,0                                                                              | 0                                                                                     | 0                                                                                             | 0                                                                                                                                                  |                                                                                                                                                                                                     | 0                                                                                                                                                                                                        |                                                                                                                                                                                                                                                                                                                                | 0                                                                                                                                                                                                                                                                                                                                   | 0                                                                                                                                                                             |

**Indicators of the regional rehabilitation systems development in Russia (2019)**

| Regions of the Russian Federation | Availability of an interagency information system (presence - 1 point, absence - 0 point) | Total number of PwD in the region | Total number of PwD in the region | Number of PwD, whose data are stored in the interagency information system | The share of PwD, whose data are stored in the interagency information system, % | The share of PwD, whose data are stored in the interagency information system, points | Number of organizations providing rehabilitation and (or) habilitation measures in the region | Number of organizations providing rehabilitation and (or) habilitation measures in the regions and connected to the interagency information system | The share of organizations providing rehabilitation and (or) habilitation measures in the regions and connected to the interagency information system in the total number of those organizations, % | The share of organizations providing rehabilitation and (or) habilitation measures in the regions and connected to the interagency information system in the total number of those organizations, points | The share of PwD who received measures that were written in the individual rehabilitation/habilitation programs and determined by the regional agencies in the total number of PwD who received the individual rehabilitation/habilitation programs in the bureaus of medical and social expertise in the assessment period, % | The share of PwD who received measures that were written in the individual rehabilitation/habilitation programs and determined by the regional agencies in the total number of PwD who received the individual rehabilitation/habilitation programs in the bureaus of medical and social expertise in the assessment period, points | The formation of the information base of the regional system, taking into account the needs of PwD in rehabilitation and (or) habilitation services, points |
|-----------------------------------|-------------------------------------------------------------------------------------------|-----------------------------------|-----------------------------------|----------------------------------------------------------------------------|----------------------------------------------------------------------------------|---------------------------------------------------------------------------------------|-----------------------------------------------------------------------------------------------|----------------------------------------------------------------------------------------------------------------------------------------------------|-----------------------------------------------------------------------------------------------------------------------------------------------------------------------------------------------------|----------------------------------------------------------------------------------------------------------------------------------------------------------------------------------------------------------|--------------------------------------------------------------------------------------------------------------------------------------------------------------------------------------------------------------------------------------------------------------------------------------------------------------------------------|-------------------------------------------------------------------------------------------------------------------------------------------------------------------------------------------------------------------------------------------------------------------------------------------------------------------------------------|-------------------------------------------------------------------------------------------------------------------------------------------------------------|
| Region 67                         | 0                                                                                         | 21576                             | 22898                             | 0                                                                          | 0,0                                                                              | 0                                                                                     | 2                                                                                             | 0                                                                                                                                                  | 0,0                                                                                                                                                                                                 | 0                                                                                                                                                                                                        | 71                                                                                                                                                                                                                                                                                                                             | 0,7                                                                                                                                                                                                                                                                                                                                 | 0,7                                                                                                                                                         |
| Region 68                         | 1                                                                                         | 272084                            | 291 529                           | 136 644                                                                    | 46,9                                                                             | 0,4                                                                                   | 334                                                                                           | 49                                                                                                                                                 | 14,7                                                                                                                                                                                                | 0,1                                                                                                                                                                                                      | 77,9                                                                                                                                                                                                                                                                                                                           | 0,7                                                                                                                                                                                                                                                                                                                                 | 2,2                                                                                                                                                         |
| Region 69                         | 0                                                                                         | 74365                             | 77 821                            | 0                                                                          | 0,0                                                                              | 0                                                                                     | 41                                                                                            | 0                                                                                                                                                  | 0,0                                                                                                                                                                                                 | 0                                                                                                                                                                                                        | 21,5                                                                                                                                                                                                                                                                                                                           | 0,2                                                                                                                                                                                                                                                                                                                                 | 0,2                                                                                                                                                         |
| Region 70                         | 1                                                                                         | 211192                            | 223505                            | 88197                                                                      | 39,5                                                                             | 0,3                                                                                   | 1199                                                                                          | 899                                                                                                                                                | 75,0                                                                                                                                                                                                | 0,7                                                                                                                                                                                                      | 92,9                                                                                                                                                                                                                                                                                                                           | 0,9                                                                                                                                                                                                                                                                                                                                 | 2,9                                                                                                                                                         |
| Region 71                         | 0                                                                                         | 108687                            | 112261                            | 0                                                                          | 0,0                                                                              | 0                                                                                     | 96                                                                                            | 0                                                                                                                                                  | 0,0                                                                                                                                                                                                 | 0                                                                                                                                                                                                        | 91,8                                                                                                                                                                                                                                                                                                                           | 0,9                                                                                                                                                                                                                                                                                                                                 | 0,9                                                                                                                                                         |
| Region 72                         | 0                                                                                         | 96861                             | 102498,0                          | 0                                                                          | 0,0                                                                              | 0                                                                                     | 91,0                                                                                          | 0                                                                                                                                                  | 0,0                                                                                                                                                                                                 | 0                                                                                                                                                                                                        | 0,5                                                                                                                                                                                                                                                                                                                            | 0                                                                                                                                                                                                                                                                                                                                   | 0                                                                                                                                                           |
| Region 73                         | 0                                                                                         | 58819                             | 64660                             | 0                                                                          | 0,0                                                                              | 0                                                                                     | 578                                                                                           | 0                                                                                                                                                  | 0,0                                                                                                                                                                                                 | 0                                                                                                                                                                                                        | 65,0                                                                                                                                                                                                                                                                                                                           | 0,6                                                                                                                                                                                                                                                                                                                                 | 0,6                                                                                                                                                         |
| Region 74                         | 1                                                                                         | 145770                            | 151138                            | 137019                                                                     | 90,7                                                                             | 0,9                                                                                   | 503                                                                                           | 104                                                                                                                                                | 20,7                                                                                                                                                                                                | 0,2                                                                                                                                                                                                      | 85,8                                                                                                                                                                                                                                                                                                                           | 0,8                                                                                                                                                                                                                                                                                                                                 | 2,9                                                                                                                                                         |
| Region 75                         | 1                                                                                         | 92980                             | 98971                             | 98971                                                                      | 100,0                                                                            | 1                                                                                     | 524                                                                                           | 266                                                                                                                                                | 50,8                                                                                                                                                                                                | 0,5                                                                                                                                                                                                      | 15                                                                                                                                                                                                                                                                                                                             | 0,1                                                                                                                                                                                                                                                                                                                                 | 2,6                                                                                                                                                         |
| Region 76                         | 1                                                                                         | 103086                            | 109 247                           | 41 121                                                                     | 37,6                                                                             | 0,3                                                                                   | 106                                                                                           | 82                                                                                                                                                 | 77,4                                                                                                                                                                                                | 0,7                                                                                                                                                                                                      | 1                                                                                                                                                                                                                                                                                                                              | 1                                                                                                                                                                                                                                                                                                                                   | 3                                                                                                                                                           |
| Region 77                         | 1                                                                                         | 110380                            | 116224                            | 116224                                                                     | 100,0                                                                            | 1                                                                                     | 57                                                                                            | 0                                                                                                                                                  | 0,0                                                                                                                                                                                                 | 0                                                                                                                                                                                                        | 100                                                                                                                                                                                                                                                                                                                            | 1                                                                                                                                                                                                                                                                                                                                   | 3                                                                                                                                                           |
| Region 78                         | 0                                                                                         | 66592                             | 66616                             | 0                                                                          | 0,0                                                                              | 0                                                                                     | 64                                                                                            | 0                                                                                                                                                  | 0,0                                                                                                                                                                                                 | 0                                                                                                                                                                                                        | 15                                                                                                                                                                                                                                                                                                                             | 0,1                                                                                                                                                                                                                                                                                                                                 | 0,1                                                                                                                                                         |
| Region 79                         | 1                                                                                         | 52758                             | 59471                             | 38037                                                                      | 64,0                                                                             | 0,6                                                                                   | 1192                                                                                          | 42                                                                                                                                                 | 3,5                                                                                                                                                                                                 | 0                                                                                                                                                                                                        | 0,99                                                                                                                                                                                                                                                                                                                           | 0,9                                                                                                                                                                                                                                                                                                                                 | 2,5                                                                                                                                                         |
| Region 80                         | 0                                                                                         | 219506                            | 229032                            | 0                                                                          | 0,0                                                                              | 0                                                                                     | 1250                                                                                          | 0                                                                                                                                                  | 0,0                                                                                                                                                                                                 | 0                                                                                                                                                                                                        | >15                                                                                                                                                                                                                                                                                                                            | 0                                                                                                                                                                                                                                                                                                                                   | 0                                                                                                                                                           |
| Region 81                         | 1                                                                                         | 165663                            | 223549                            | 114010                                                                     | 51,0                                                                             | 0,5                                                                                   | 9                                                                                             | 6                                                                                                                                                  | 66,7                                                                                                                                                                                                | 0,6                                                                                                                                                                                                      | 15                                                                                                                                                                                                                                                                                                                             | 0,1                                                                                                                                                                                                                                                                                                                                 | 2,2                                                                                                                                                         |
| Region 82                         | 1                                                                                         | 77266                             | 81206                             | 81206                                                                      | 100,0                                                                            | 1                                                                                     | 734                                                                                           | 697                                                                                                                                                | 95,0                                                                                                                                                                                                | 0,9                                                                                                                                                                                                      | 85                                                                                                                                                                                                                                                                                                                             | 0,8                                                                                                                                                                                                                                                                                                                                 | 3,7                                                                                                                                                         |
| Region 83                         | 1                                                                                         | 1635                              | 1860                              | 1129                                                                       | 60,7                                                                             | 0,6                                                                                   | 4                                                                                             | 3                                                                                                                                                  | 75,0                                                                                                                                                                                                | 0,7                                                                                                                                                                                                      | 60,5                                                                                                                                                                                                                                                                                                                           | 0,6                                                                                                                                                                                                                                                                                                                                 | 2,9                                                                                                                                                         |
| Region 84                         | 0                                                                                         | 13617                             | 15873                             | 0                                                                          | 0,0                                                                              | 0                                                                                     | 372                                                                                           | 0                                                                                                                                                  | 0,0                                                                                                                                                                                                 | 0                                                                                                                                                                                                        | 100,0                                                                                                                                                                                                                                                                                                                          | 1                                                                                                                                                                                                                                                                                                                                   | 1                                                                                                                                                           |
| Region 85                         | 0                                                                                         | 100503                            | 0                                 | 0                                                                          |                                                                                  | 0                                                                                     | 114                                                                                           | 0                                                                                                                                                  | 0,0                                                                                                                                                                                                 | 0                                                                                                                                                                                                        | 96,5                                                                                                                                                                                                                                                                                                                           | 0,9                                                                                                                                                                                                                                                                                                                                 | 0,9                                                                                                                                                         |

### Indicators of the regional rehabilitation systems development in Russia (2019)

| Regions of the Russian Federation | The formation of an integrated approach to the organization of the regional system in the region, points | The satisfaction of PwD (their legal representatives) with rehabilitation or habilitation measures (services), points | The staffing of organizations providing rehabilitation and (or) habilitation services with specialists of the appropriate profile based on the needs of PwD in rehabilitation and (or) habilitation services | The formation of the information base of the regional system, taking into account information about the needs of PwD in rehabilitation and (or) habilitation services, points | The final point score of the regional rehabilitation system, points |
|-----------------------------------|----------------------------------------------------------------------------------------------------------|-----------------------------------------------------------------------------------------------------------------------|--------------------------------------------------------------------------------------------------------------------------------------------------------------------------------------------------------------|-------------------------------------------------------------------------------------------------------------------------------------------------------------------------------|---------------------------------------------------------------------|
| Region 1                          | 3                                                                                                        | 1,8                                                                                                                   | 1,3                                                                                                                                                                                                          | 0,1                                                                                                                                                                           | 6,2                                                                 |
| Region 2                          | 2                                                                                                        | 1,3                                                                                                                   | 1,5                                                                                                                                                                                                          | 0,1                                                                                                                                                                           | 4,9                                                                 |
| Region 3                          | 4,2                                                                                                      | 0,9                                                                                                                   | 1                                                                                                                                                                                                            | 0                                                                                                                                                                             | 6,1                                                                 |
| Region 4                          | 4                                                                                                        | 1,6                                                                                                                   | 1                                                                                                                                                                                                            | 0                                                                                                                                                                             | 6,6                                                                 |
| Region 5                          | 2                                                                                                        | 1,7                                                                                                                   | 0,5                                                                                                                                                                                                          | 0,1                                                                                                                                                                           | 4,3                                                                 |
| Region 6                          | 4,1                                                                                                      | 1                                                                                                                     | 1,5                                                                                                                                                                                                          | 0,8                                                                                                                                                                           | 7,4                                                                 |
| Region 7                          | 4,5                                                                                                      | 1,6                                                                                                                   | 1,2                                                                                                                                                                                                          | 3,1                                                                                                                                                                           | 10,4                                                                |
| Region 8                          | 4,3                                                                                                      | 1,4                                                                                                                   | 1,5                                                                                                                                                                                                          | 2,6                                                                                                                                                                           | 9,8                                                                 |
| Region 9                          | 3                                                                                                        | 1,7                                                                                                                   | 1,3                                                                                                                                                                                                          | 2,9                                                                                                                                                                           | 8,9                                                                 |
| Region 10                         | 4,2                                                                                                      | 1,6                                                                                                                   | 0,3                                                                                                                                                                                                          | 0                                                                                                                                                                             | 6,1                                                                 |
| Region 11                         | 4,5                                                                                                      | 0,8                                                                                                                   | 0,7                                                                                                                                                                                                          | 2                                                                                                                                                                             | 8                                                                   |
| Region 12                         | 5                                                                                                        | 1,8                                                                                                                   | 1,1                                                                                                                                                                                                          | 0,5                                                                                                                                                                           | 8,4                                                                 |
| Region 13                         | 3,4                                                                                                      | 1,8                                                                                                                   | 1                                                                                                                                                                                                            | 0,9                                                                                                                                                                           | 7,1                                                                 |
| Region 14                         | 3                                                                                                        | 1,7                                                                                                                   | 1,2                                                                                                                                                                                                          | 2,3                                                                                                                                                                           | 8,2                                                                 |
| Region 15                         | 1,8                                                                                                      | 0,9                                                                                                                   | 1,1                                                                                                                                                                                                          | 3,4                                                                                                                                                                           | 7,2                                                                 |
| Region 16                         | 4,7                                                                                                      | 1,5                                                                                                                   | 0,4                                                                                                                                                                                                          | 1                                                                                                                                                                             | 7,6                                                                 |

### Indicators of the regional rehabilitation systems development in Russia (2019)

| Regions of the Russian Federation | The formation of an integrated approach to the organization of the regional system in the region, points | The satisfaction of PwD (their legal representatives) with rehabilitation or habilitation measures (services), points | The staffing of organizations providing rehabilitation and (or) habilitation services with specialists of the appropriate profile based on the needs of PwD in rehabilitation and (or) habilitation services | The formation of the information base of the regional system, taking into account information about the needs of PwD in rehabilitation and (or) habilitation services, points | The final point score of the regional rehabilitation system, points |
|-----------------------------------|----------------------------------------------------------------------------------------------------------|-----------------------------------------------------------------------------------------------------------------------|--------------------------------------------------------------------------------------------------------------------------------------------------------------------------------------------------------------|-------------------------------------------------------------------------------------------------------------------------------------------------------------------------------|---------------------------------------------------------------------|
| Region 17                         | 4,3                                                                                                      | 1,8                                                                                                                   | 1,7                                                                                                                                                                                                          | 0                                                                                                                                                                             | 7,8                                                                 |
| Region 18                         | 3,8                                                                                                      | 0,7                                                                                                                   | 0,1                                                                                                                                                                                                          | 0                                                                                                                                                                             | 4,6                                                                 |
| Region 19                         | 3                                                                                                        | 1,7                                                                                                                   | 1,1                                                                                                                                                                                                          | 2,8                                                                                                                                                                           | 8,6                                                                 |
| Region 20                         | 4,3                                                                                                      | 1,5                                                                                                                   | 1,2                                                                                                                                                                                                          | 3                                                                                                                                                                             | 10                                                                  |
| Region 21                         | 3,4                                                                                                      | 1,3                                                                                                                   | 0,2                                                                                                                                                                                                          | 2,5                                                                                                                                                                           | 7,4                                                                 |
| Region 22                         | 3,7                                                                                                      | 1,9                                                                                                                   | 0,9                                                                                                                                                                                                          | 1,6                                                                                                                                                                           | 8,1                                                                 |
| Region 23                         | 2,7                                                                                                      | 1,5                                                                                                                   | 1                                                                                                                                                                                                            | 0                                                                                                                                                                             | 5,2                                                                 |
| Region 24                         | 4,1                                                                                                      | 1,8                                                                                                                   | 0,8                                                                                                                                                                                                          | 2,1                                                                                                                                                                           | 8,8                                                                 |
| Region 25                         | 3,2                                                                                                      | 1,6                                                                                                                   | 0,4                                                                                                                                                                                                          | 0                                                                                                                                                                             | 5,2                                                                 |
| Region 26                         | 4,1                                                                                                      | 0,9                                                                                                                   | 1,3                                                                                                                                                                                                          | 2                                                                                                                                                                             | 8,3                                                                 |
| Region 27                         | 4,1                                                                                                      | 1,7                                                                                                                   | 1,1                                                                                                                                                                                                          | 0                                                                                                                                                                             | 6,9                                                                 |
| Region 28                         | 4,9                                                                                                      | 1,6                                                                                                                   | 1                                                                                                                                                                                                            | 2,3                                                                                                                                                                           | 9,8                                                                 |
| Region 29                         | 3,5                                                                                                      | 1,7                                                                                                                   | 1,3                                                                                                                                                                                                          | 0,1                                                                                                                                                                           | 6,6                                                                 |
| Region 30                         | 4,7                                                                                                      | 0,3                                                                                                                   | 0,2                                                                                                                                                                                                          | 3,8                                                                                                                                                                           | 9                                                                   |
| Region 31                         | 4,4                                                                                                      | 1,4                                                                                                                   | 0,7                                                                                                                                                                                                          | 2,3                                                                                                                                                                           | 8,8                                                                 |
| Region 32                         | 4,9                                                                                                      | 1,8                                                                                                                   | 0,7                                                                                                                                                                                                          | 0                                                                                                                                                                             | 7,4                                                                 |

### Indicators of the regional rehabilitation systems development in Russia (2019)

| Regions of the Russian Federation | The formation of an integrated approach to the organization of the regional system in the region, points | The satisfaction of PwD (their legal representatives) with rehabilitation or habilitation measures (services), points | The staffing of organizations providing rehabilitation and (or) habilitation services with specialists of the appropriate profile based on the needs of PwD in rehabilitation and (or) habilitation services | The formation of the information base of the regional system, taking into account information about the needs of PwD in rehabilitation and (or) habilitation services, points | The final point score of the regional rehabilitation system, points |
|-----------------------------------|----------------------------------------------------------------------------------------------------------|-----------------------------------------------------------------------------------------------------------------------|--------------------------------------------------------------------------------------------------------------------------------------------------------------------------------------------------------------|-------------------------------------------------------------------------------------------------------------------------------------------------------------------------------|---------------------------------------------------------------------|
| Region 33                         | 4,3                                                                                                      | 1,4                                                                                                                   | 0                                                                                                                                                                                                            | 2,8                                                                                                                                                                           | 8,5                                                                 |
| Region 34                         | 4,6                                                                                                      | 1,6                                                                                                                   | 1,1                                                                                                                                                                                                          | 0,3                                                                                                                                                                           | 7,6                                                                 |
| Region 35                         | 3,4                                                                                                      | 1                                                                                                                     | 1                                                                                                                                                                                                            | 1                                                                                                                                                                             | 6,4                                                                 |
| Region 36                         | 4,4                                                                                                      | 0,9                                                                                                                   | 0,9                                                                                                                                                                                                          | 0                                                                                                                                                                             | 6,2                                                                 |
| Region 37                         | 4,9                                                                                                      | 1,8                                                                                                                   | 2                                                                                                                                                                                                            | 0,9                                                                                                                                                                           | 9,6                                                                 |
| Region 38                         | 4,2                                                                                                      | 1,8                                                                                                                   | 1,5                                                                                                                                                                                                          | 2,9                                                                                                                                                                           | 10,4                                                                |
| Region 39                         | 4,4                                                                                                      | 1,8                                                                                                                   | 1,5                                                                                                                                                                                                          | 1,3                                                                                                                                                                           | 9                                                                   |
| Region 40                         | 5                                                                                                        | 1,4                                                                                                                   | 0,5                                                                                                                                                                                                          | 0                                                                                                                                                                             | 6,9                                                                 |
| Region 41                         | 4,2                                                                                                      | 1                                                                                                                     | 0,8                                                                                                                                                                                                          | 0,1                                                                                                                                                                           | 6,1                                                                 |
| Region 42                         | 3,7                                                                                                      | 2                                                                                                                     | 1,8                                                                                                                                                                                                          | 0                                                                                                                                                                             | 7,5                                                                 |
| Region 43                         | 5                                                                                                        | 1,8                                                                                                                   | 1,3                                                                                                                                                                                                          | 1                                                                                                                                                                             | 9,1                                                                 |
| Region 44                         | 3,5                                                                                                      | 1                                                                                                                     | 0                                                                                                                                                                                                            | 0,5                                                                                                                                                                           | 5                                                                   |
| Region 45                         | 4,4                                                                                                      | 1,7                                                                                                                   | 1,8                                                                                                                                                                                                          | 2,3                                                                                                                                                                           | 10,2                                                                |
| Region 46                         | 3                                                                                                        | 1,3                                                                                                                   | 0,3                                                                                                                                                                                                          | 0                                                                                                                                                                             | 4,6                                                                 |
| Region 47                         | 2,3                                                                                                      | 1,4                                                                                                                   | 1,8                                                                                                                                                                                                          | 0                                                                                                                                                                             | 5,5                                                                 |
| Region 48                         | 3,7                                                                                                      | 1,8                                                                                                                   | 0,7                                                                                                                                                                                                          | 0                                                                                                                                                                             | 6,2                                                                 |

### Indicators of the regional rehabilitation systems development in Russia (2019)

| Regions of the Russian Federation | The formation of an integrated approach to the organization of the regional system in the region, points | The satisfaction of PwD (their legal representatives) with rehabilitation or habilitation measures (services), points | The staffing of organizations providing rehabilitation and (or) habilitation services with specialists of the appropriate profile based on the needs of PwD in rehabilitation and (or) habilitation services | The formation of the information base of the regional system, taking into account information about the needs of PwD in rehabilitation and (or) habilitation services, points | The final point score of the regional rehabilitation system, points |
|-----------------------------------|----------------------------------------------------------------------------------------------------------|-----------------------------------------------------------------------------------------------------------------------|--------------------------------------------------------------------------------------------------------------------------------------------------------------------------------------------------------------|-------------------------------------------------------------------------------------------------------------------------------------------------------------------------------|---------------------------------------------------------------------|
| Region 49                         | 4,7                                                                                                      | 2                                                                                                                     | 1,3                                                                                                                                                                                                          | 0,5                                                                                                                                                                           | 8,5                                                                 |
| Region 50                         | 3,7                                                                                                      | 1,2                                                                                                                   | 1,7                                                                                                                                                                                                          | 1                                                                                                                                                                             | 7,6                                                                 |
| Region 51                         | 2,5                                                                                                      | 1,9                                                                                                                   | 0,5                                                                                                                                                                                                          | 1                                                                                                                                                                             | 5,9                                                                 |
| Region 52                         | 4,3                                                                                                      | 1,9                                                                                                                   | 1,1                                                                                                                                                                                                          | 0,4                                                                                                                                                                           | 7,7                                                                 |
| Region 53                         | 4,1                                                                                                      | 0,9                                                                                                                   | 0,6                                                                                                                                                                                                          | 1                                                                                                                                                                             | 6,6                                                                 |
| Region 54                         | 2,3                                                                                                      | 1,6                                                                                                                   | 1,2                                                                                                                                                                                                          | 0,6                                                                                                                                                                           | 5,7                                                                 |
| Region 55                         | 2,1                                                                                                      | 1,7                                                                                                                   | 1,8                                                                                                                                                                                                          | 0                                                                                                                                                                             | 5,6                                                                 |
| Region 56                         | 3,7                                                                                                      | 1,6                                                                                                                   | 0,3                                                                                                                                                                                                          | 2,5                                                                                                                                                                           | 8,1                                                                 |
| Region 57                         | 3,1                                                                                                      | 1                                                                                                                     | 0,5                                                                                                                                                                                                          | 1,2                                                                                                                                                                           | 5,8                                                                 |
| Region 58                         | 4,3                                                                                                      | 0,9                                                                                                                   | 0,5                                                                                                                                                                                                          | 1,7                                                                                                                                                                           | 7,4                                                                 |
| Region 59                         | 4,5                                                                                                      | 1,8                                                                                                                   | 0,9                                                                                                                                                                                                          | 0                                                                                                                                                                             | 7,2                                                                 |
| Region 60                         | 3,5                                                                                                      | 0                                                                                                                     | 1,3                                                                                                                                                                                                          | 2,8                                                                                                                                                                           | 7,6                                                                 |
| Region 61                         | 4                                                                                                        | 1                                                                                                                     | 0,1                                                                                                                                                                                                          | 3,1                                                                                                                                                                           | 8,2                                                                 |
| Region 62                         | 1,3                                                                                                      | 1,8                                                                                                                   | 1,3                                                                                                                                                                                                          | 0                                                                                                                                                                             | 4,4                                                                 |
| Region 63                         | 3,8                                                                                                      | 0,6                                                                                                                   | 0,2                                                                                                                                                                                                          | 0,8                                                                                                                                                                           | 5,4                                                                 |
| Region 64                         | 2,2                                                                                                      | 0                                                                                                                     | 0,8                                                                                                                                                                                                          | 0,1                                                                                                                                                                           | 3,1                                                                 |

### Indicators of the regional rehabilitation systems development in Russia (2019)

| Regions of the Russian Federation | The formation of an integrated approach to the organization of the regional system in the region, points | The satisfaction of PwD (their legal representatives) with rehabilitation or habilitation measures (services), points | The staffing of organizations providing rehabilitation and (or) habilitation services with specialists of the appropriate profile based on the needs of PwD in rehabilitation and (or) habilitation services | The formation of the information base of the regional system, taking into account information about the needs of PwD in rehabilitation and (or) habilitation services, points | The final point score of the regional rehabilitation system, points |
|-----------------------------------|----------------------------------------------------------------------------------------------------------|-----------------------------------------------------------------------------------------------------------------------|--------------------------------------------------------------------------------------------------------------------------------------------------------------------------------------------------------------|-------------------------------------------------------------------------------------------------------------------------------------------------------------------------------|---------------------------------------------------------------------|
| Region 65                         | 3,3                                                                                                      | 1,6                                                                                                                   | 1,7                                                                                                                                                                                                          | 1                                                                                                                                                                             | 7,6                                                                 |
| Region 66                         | 1,3                                                                                                      | 1,5                                                                                                                   | 1,7                                                                                                                                                                                                          | 0                                                                                                                                                                             | 4,5                                                                 |
| Region 67                         | 4                                                                                                        | 1,8                                                                                                                   | 1,3                                                                                                                                                                                                          | 0,7                                                                                                                                                                           | 7,8                                                                 |
| Region 68                         | 3,8                                                                                                      | 1,4                                                                                                                   | 1,5                                                                                                                                                                                                          | 2,2                                                                                                                                                                           | 8,9                                                                 |
| Region 69                         | 4,4                                                                                                      | 2                                                                                                                     | 0,6                                                                                                                                                                                                          | 0,2                                                                                                                                                                           | 7,2                                                                 |
| Region 70                         | 4                                                                                                        | 1,8                                                                                                                   | 1,5                                                                                                                                                                                                          | 2,9                                                                                                                                                                           | 10,2                                                                |
| Region 71                         | 3,7                                                                                                      | 1,8                                                                                                                   | 0,8                                                                                                                                                                                                          | 0,9                                                                                                                                                                           | 7,2                                                                 |
| Region 72                         | 2,4                                                                                                      | 1,8                                                                                                                   | 2                                                                                                                                                                                                            | 0                                                                                                                                                                             | 6,2                                                                 |
| Region 73                         | 3                                                                                                        | 1,8                                                                                                                   | 1,2                                                                                                                                                                                                          | 0,6                                                                                                                                                                           | 6,6                                                                 |
| Region 74                         | 3,7                                                                                                      | 1,8                                                                                                                   | 1,4                                                                                                                                                                                                          | 2,9                                                                                                                                                                           | 9,8                                                                 |
| Region 75                         | 4,6                                                                                                      | 1,5                                                                                                                   | 1,7                                                                                                                                                                                                          | 2,6                                                                                                                                                                           | 10,4                                                                |
| Region 76                         | 4,2                                                                                                      | 1,8                                                                                                                   | 0,3                                                                                                                                                                                                          | 3                                                                                                                                                                             | 9,3                                                                 |
| Region 77                         | 4,3                                                                                                      | 1,6                                                                                                                   | 2                                                                                                                                                                                                            | 3                                                                                                                                                                             | 10,9                                                                |
| Region 78                         | 4,5                                                                                                      | 1,8                                                                                                                   | 1,4                                                                                                                                                                                                          | 0,1                                                                                                                                                                           | 7,8                                                                 |
| Region 79                         | 4                                                                                                        | 1,8                                                                                                                   | 1,6                                                                                                                                                                                                          | 2,5                                                                                                                                                                           | 9,9                                                                 |
| Region 80                         | 4,5                                                                                                      | 1,8                                                                                                                   | 1,5                                                                                                                                                                                                          | 0                                                                                                                                                                             | 7,8                                                                 |

### Indicators of the regional rehabilitation systems development in Russia (2019)

| Regions of the Russian Federation | The formation of an integrated approach to the organization of the regional system in the region, points | The satisfaction of PwD (their legal representatives) with rehabilitation or habilitation measures (services), points | The staffing of organizations providing rehabilitation and (or) habilitation services with specialists of the appropriate profile based on the needs of PwD in rehabilitation and (or) habilitation services | The formation of the information base of the regional system, taking into account information about the needs of PwD in rehabilitation and (or) habilitation services, points | The final point score of the regional rehabilitation system, points |
|-----------------------------------|----------------------------------------------------------------------------------------------------------|-----------------------------------------------------------------------------------------------------------------------|--------------------------------------------------------------------------------------------------------------------------------------------------------------------------------------------------------------|-------------------------------------------------------------------------------------------------------------------------------------------------------------------------------|---------------------------------------------------------------------|
| Region 81                         | 5                                                                                                        | 1,8                                                                                                                   | 0                                                                                                                                                                                                            | 2,2                                                                                                                                                                           | 9                                                                   |
| Region 82                         | 3,8                                                                                                      | 1,8                                                                                                                   | 1                                                                                                                                                                                                            | 3,7                                                                                                                                                                           | 10,3                                                                |
| Region 83                         | 2,7                                                                                                      | 0                                                                                                                     | 0                                                                                                                                                                                                            | 2,9                                                                                                                                                                           | 5,6                                                                 |
| Region 84                         | 4,8                                                                                                      | 0                                                                                                                     | 1,5                                                                                                                                                                                                          | 1                                                                                                                                                                             | 7,3                                                                 |
| Region 85                         | 4,4                                                                                                      | 1,9                                                                                                                   | 1,8                                                                                                                                                                                                          | 0,9                                                                                                                                                                           | 9                                                                   |
