# Supplementary material for: Capabilities Approach Application in the Development of Regional Rehabilitation Systems in Russia
Source: MDPI journal article supplement (doi:10.3390/soc12060166), 2022-11-19
Supplement: s1 [file s1 › Indicators of the regional rehabilitation systems development in Russia (2020) (3).pdf]

**Table S3: Indicators of the regional rehabilitation systems development in Russia (2020)**

| Regions of the Russian Federation | Number of organizations providing rehabilitation and (or) habilitation services and included in the regional system regarding to the formation an integrated approach to its arrangement | Total number of organizations providing rehabilitation and (or) habilitation services and located in the region | The share of organizations providing rehabilitation and (or) habilitation services and included in the regional system regarding to the formation an integrated approach to its arrangement in the total number of organizations providing rehabilitation and (or) habilitation services and located in the region, % | The share of organizations providing rehabilitation and (or) habilitation services and included in the regional system regarding to the formation an integrated approach to its arrangement in the total number of organizations providing rehabilitation and (or) habilitation services and located in the region, points | Number of regional agencies in various fields of activities (healthcare, education, social protection, physical culture and sports, culture, labor and employment, information and communication) involved in the formation of an integrated approach to the arrangement of the regional system | Number of regional agencies in various fields of activity (healthcare, education, social protection, physical culture and sports, culture, labor and employment, information and communication) involved in the formation of an integrated approach to the arrangement of the regional system, points | Availability of the legal and methodological base of the regional system for forming an integrated approach to its arrangement, agreements on interaction between providers of rehabilitation and (or) habilitation measures (presence – 1 point, absence – 0 point) | Funding allocated for rehabilitation and habilitation measures to meet the needs of the disabled in the assessment period, million rubles | Funding allocated for rehabilitation and habilitation measures to meet the needs of PwD in the previous period, million rubles | The share of changes in funding allocated for rehabilitation and habilitation measures to meet the needs of PwD in comparison with the previous period | The share of changes in funding allocated for rehabilitation and habilitation measures to meet the needs of PwD in comparison with the previous period, points | Availability of the feasible regional recommendations on options for the provision of rehabilitation and habilitation measures for PwD (plan approved by agencies, certificates, co-financing, and others) (presence - 1 point, absence - 0 point) | The formation of an integrated approach to the organization of the regional system in the region, points |
|-----------------------------------|------------------------------------------------------------------------------------------------------------------------------------------------------------------------------------------|-----------------------------------------------------------------------------------------------------------------|-----------------------------------------------------------------------------------------------------------------------------------------------------------------------------------------------------------------------------------------------------------------------------------------------------------------------|----------------------------------------------------------------------------------------------------------------------------------------------------------------------------------------------------------------------------------------------------------------------------------------------------------------------------|-------------------------------------------------------------------------------------------------------------------------------------------------------------------------------------------------------------------------------------------------------------------------------------------------|-------------------------------------------------------------------------------------------------------------------------------------------------------------------------------------------------------------------------------------------------------------------------------------------------------|----------------------------------------------------------------------------------------------------------------------------------------------------------------------------------------------------------------------------------------------------------------------|-------------------------------------------------------------------------------------------------------------------------------------------|--------------------------------------------------------------------------------------------------------------------------------|--------------------------------------------------------------------------------------------------------------------------------------------------------|----------------------------------------------------------------------------------------------------------------------------------------------------------------|----------------------------------------------------------------------------------------------------------------------------------------------------------------------------------------------------------------------------------------------------|----------------------------------------------------------------------------------------------------------|
| Region 1                          | 116                                                                                                                                                                                      | 260                                                                                                             | 44,6                                                                                                                                                                                                                                                                                                                  | 0,4                                                                                                                                                                                                                                                                                                                        | 7                                                                                                                                                                                                                                                                                               | 1                                                                                                                                                                                                                                                                                                     | 1                                                                                                                                                                                                                                                                    | 22,1                                                                                                                                      | 15,3                                                                                                                           | 0,44                                                                                                                                                   | 1                                                                                                                                                              | 0                                                                                                                                                                                                                                                  | 3,4                                                                                                      |
| Region 2                          | 3                                                                                                                                                                                        | 55                                                                                                              | 5,5                                                                                                                                                                                                                                                                                                                   | 0,1                                                                                                                                                                                                                                                                                                                        | 7                                                                                                                                                                                                                                                                                               | 1                                                                                                                                                                                                                                                                                                     | 1                                                                                                                                                                                                                                                                    | 18,6                                                                                                                                      | 33,5                                                                                                                           | -0,45                                                                                                                                                  | 0                                                                                                                                                              | 0                                                                                                                                                                                                                                                  | 2,1                                                                                                      |
| Region 3                          | 32                                                                                                                                                                                       | 32                                                                                                              | 100,0                                                                                                                                                                                                                                                                                                                 | 1,0                                                                                                                                                                                                                                                                                                                        | 5                                                                                                                                                                                                                                                                                               | 0,7                                                                                                                                                                                                                                                                                                   | 1                                                                                                                                                                                                                                                                    | 530,5                                                                                                                                     | 395,59                                                                                                                         | 0,34                                                                                                                                                   | 1                                                                                                                                                              | 1                                                                                                                                                                                                                                                  | 4,7                                                                                                      |
| Region 4                          | 223                                                                                                                                                                                      | 297                                                                                                             | 75,1                                                                                                                                                                                                                                                                                                                  | 0,8                                                                                                                                                                                                                                                                                                                        | 6                                                                                                                                                                                                                                                                                               | 1                                                                                                                                                                                                                                                                                                     | 1                                                                                                                                                                                                                                                                    | 105                                                                                                                                       | 194                                                                                                                            | 0                                                                                                                                                      | 0                                                                                                                                                              | 0                                                                                                                                                                                                                                                  | 2,8                                                                                                      |
| Region 5                          | 57                                                                                                                                                                                       | 119                                                                                                             | 47,9                                                                                                                                                                                                                                                                                                                  | 0,5                                                                                                                                                                                                                                                                                                                        | 6                                                                                                                                                                                                                                                                                               | 1                                                                                                                                                                                                                                                                                                     | 0                                                                                                                                                                                                                                                                    | 84                                                                                                                                        | 46,1                                                                                                                           | 0,82                                                                                                                                                   | 1                                                                                                                                                              | 0                                                                                                                                                                                                                                                  | 2,5                                                                                                      |
| Region 6                          | 106                                                                                                                                                                                      | 122                                                                                                             | 86,9                                                                                                                                                                                                                                                                                                                  | 0,9                                                                                                                                                                                                                                                                                                                        | 6                                                                                                                                                                                                                                                                                               | 1                                                                                                                                                                                                                                                                                                     | 1                                                                                                                                                                                                                                                                    | 6,24                                                                                                                                      | 38,56                                                                                                                          | -0,84                                                                                                                                                  | 0                                                                                                                                                              | 1                                                                                                                                                                                                                                                  | 3,9                                                                                                      |
| Region 7                          | 53                                                                                                                                                                                       | 96                                                                                                              | 55,2                                                                                                                                                                                                                                                                                                                  | 0,6                                                                                                                                                                                                                                                                                                                        | 6                                                                                                                                                                                                                                                                                               | 1                                                                                                                                                                                                                                                                                                     | 1                                                                                                                                                                                                                                                                    | 14,47                                                                                                                                     | 10                                                                                                                             | 0,44                                                                                                                                                   | 1                                                                                                                                                              | 1                                                                                                                                                                                                                                                  | 4,6                                                                                                      |
| Region 8                          | 83                                                                                                                                                                                       | 169                                                                                                             | 49,1                                                                                                                                                                                                                                                                                                                  | 0,5                                                                                                                                                                                                                                                                                                                        | 6                                                                                                                                                                                                                                                                                               | 1                                                                                                                                                                                                                                                                                                     | 1                                                                                                                                                                                                                                                                    | 0,6                                                                                                                                       | 0,8                                                                                                                            | -0,26                                                                                                                                                  | 0                                                                                                                                                              | 1                                                                                                                                                                                                                                                  | 3,5                                                                                                      |
| Region 9                          | 136                                                                                                                                                                                      | 283                                                                                                             | 48,1                                                                                                                                                                                                                                                                                                                  | 0,5                                                                                                                                                                                                                                                                                                                        | 6                                                                                                                                                                                                                                                                                               | 1                                                                                                                                                                                                                                                                                                     | 1                                                                                                                                                                                                                                                                    | 25                                                                                                                                        | 11                                                                                                                             | 1,27                                                                                                                                                   | 1                                                                                                                                                              | 0                                                                                                                                                                                                                                                  | 3,5                                                                                                      |
| Region 10                         | 326                                                                                                                                                                                      | 326                                                                                                             | 100,0                                                                                                                                                                                                                                                                                                                 | 1,0                                                                                                                                                                                                                                                                                                                        | 6                                                                                                                                                                                                                                                                                               | 1                                                                                                                                                                                                                                                                                                     | 0                                                                                                                                                                                                                                                                    | 607                                                                                                                                       | 234                                                                                                                            | 1,59                                                                                                                                                   | 1                                                                                                                                                              | 0                                                                                                                                                                                                                                                  | 3,0                                                                                                      |
| Region 11                         | 6                                                                                                                                                                                        | 9                                                                                                               | 66,7                                                                                                                                                                                                                                                                                                                  | 0,7                                                                                                                                                                                                                                                                                                                        | 3                                                                                                                                                                                                                                                                                               | 0,4                                                                                                                                                                                                                                                                                                   | 0                                                                                                                                                                                                                                                                    | 0,5                                                                                                                                       | 0,5                                                                                                                            | 0                                                                                                                                                      | 0,5                                                                                                                                                            | 0                                                                                                                                                                                                                                                  | 1,6                                                                                                      |
| Region 12                         | 98                                                                                                                                                                                       | 135                                                                                                             | 72,6                                                                                                                                                                                                                                                                                                                  | 0,7                                                                                                                                                                                                                                                                                                                        | 7                                                                                                                                                                                                                                                                                               | 1                                                                                                                                                                                                                                                                                                     | 1                                                                                                                                                                                                                                                                    | 18,7                                                                                                                                      | 33,3                                                                                                                           | -0,44                                                                                                                                                  | 0                                                                                                                                                              | 1                                                                                                                                                                                                                                                  | 3,7                                                                                                      |
| Region 13                         | 70                                                                                                                                                                                       | 147                                                                                                             | 47,6                                                                                                                                                                                                                                                                                                                  | 0,5                                                                                                                                                                                                                                                                                                                        | 6                                                                                                                                                                                                                                                                                               | 1                                                                                                                                                                                                                                                                                                     | 1                                                                                                                                                                                                                                                                    | 29,61                                                                                                                                     | 18,7                                                                                                                           | 0,58                                                                                                                                                   | 1                                                                                                                                                              | 1                                                                                                                                                                                                                                                  | 4,5                                                                                                      |

**Indicators of the regional rehabilitation systems development in Russia (2020)**

| Regions of the Russian Federation | Number of organizations providing rehabilitation and (or) habilitation services and included in the regional system regarding to the formation an integrated approach to its arrangement | Total number of organizations providing rehabilitation and (or) habilitation services and located in the region | The share of organizations providing rehabilitation and (or) habilitation services and included in the regional system regarding to the formation an integrated approach to its arrangement in the total number of organizations providing rehabilitation and (or) habilitation services and located in the region, % | The share of organizations providing rehabilitation and (or) habilitation services and included in the regional system regarding to the formation an integrated approach to its arrangement in the total number of organizations providing rehabilitation and (or) habilitation services and located in the region, points | Number of regional agencies in various fields of activities (healthcare, education, social protection, physical culture and sports, culture, labor and employment, information and communication) involved in the formation of an integrated approach to the arrangement of the regional system | Number of regional agencies in various fields of activity (healthcare, education, social protection, physical culture and sports, culture, labor and employment, information and communication) involved in the formation of an integrated approach to the arrangement of the regional system, points | Availability of the legal and methodological base of the regional system for forming an integrated approach to its arrangement, agreements on interaction between providers of rehabilitation and (or) habilitation measures (presence – 1 point, absence – 0 point) | Funding allocated for rehabilitation and habilitation measures to meet the needs of the disabled in the assessment period, million rubles | Funding allocated for rehabilitation and habilitation measures to meet the needs of PwD in the previous period, million rubles | The share of changes in funding allocated for rehabilitation and habilitation measures to meet the needs of PwD in comparison with the previous period | The share of changes in funding allocated for rehabilitation and habilitation measures to meet the needs of PwD in comparison with the previous period, points | Availability of the feasible regional recommendations on options for the provision of rehabilitation and habilitation measures for PwD (plan approved by agencies, certificates, co-financing, and others) (presence - 1 point, absence - 0 point) | The formation of an integrated approach to the organization of the regional system in the region, points |
|-----------------------------------|------------------------------------------------------------------------------------------------------------------------------------------------------------------------------------------|-----------------------------------------------------------------------------------------------------------------|-----------------------------------------------------------------------------------------------------------------------------------------------------------------------------------------------------------------------------------------------------------------------------------------------------------------------|----------------------------------------------------------------------------------------------------------------------------------------------------------------------------------------------------------------------------------------------------------------------------------------------------------------------------|-------------------------------------------------------------------------------------------------------------------------------------------------------------------------------------------------------------------------------------------------------------------------------------------------|-------------------------------------------------------------------------------------------------------------------------------------------------------------------------------------------------------------------------------------------------------------------------------------------------------|----------------------------------------------------------------------------------------------------------------------------------------------------------------------------------------------------------------------------------------------------------------------|-------------------------------------------------------------------------------------------------------------------------------------------|--------------------------------------------------------------------------------------------------------------------------------|--------------------------------------------------------------------------------------------------------------------------------------------------------|----------------------------------------------------------------------------------------------------------------------------------------------------------------|----------------------------------------------------------------------------------------------------------------------------------------------------------------------------------------------------------------------------------------------------|----------------------------------------------------------------------------------------------------------|
| Region 14                         | 35                                                                                                                                                                                       | 286                                                                                                             | 12,2                                                                                                                                                                                                                                                                                                                  | 0,1                                                                                                                                                                                                                                                                                                                        | 6                                                                                                                                                                                                                                                                                               | 1                                                                                                                                                                                                                                                                                                     | 1                                                                                                                                                                                                                                                                    | 20,6                                                                                                                                      | 13,6                                                                                                                           | 0,51                                                                                                                                                   | 1                                                                                                                                                              | 0                                                                                                                                                                                                                                                  | 3,1                                                                                                      |
| Region 15                         | 103                                                                                                                                                                                      | 294                                                                                                             | 35,0                                                                                                                                                                                                                                                                                                                  | 0,4                                                                                                                                                                                                                                                                                                                        | 5                                                                                                                                                                                                                                                                                               | 0,7                                                                                                                                                                                                                                                                                                   | 1                                                                                                                                                                                                                                                                    | 1091                                                                                                                                      | 1530                                                                                                                           | 0                                                                                                                                                      | 0                                                                                                                                                              | 1                                                                                                                                                                                                                                                  | 3,1                                                                                                      |
| Region 16                         | 71                                                                                                                                                                                       | 115                                                                                                             | 61,7                                                                                                                                                                                                                                                                                                                  | 0,6                                                                                                                                                                                                                                                                                                                        | 6                                                                                                                                                                                                                                                                                               | 1                                                                                                                                                                                                                                                                                                     | 1                                                                                                                                                                                                                                                                    | 172,9                                                                                                                                     | 161,9                                                                                                                          | 0,06                                                                                                                                                   | 1                                                                                                                                                              | 1                                                                                                                                                                                                                                                  | 4,6                                                                                                      |
| Region 17                         | 63                                                                                                                                                                                       | 63                                                                                                              | 100,0                                                                                                                                                                                                                                                                                                                 | 1,0                                                                                                                                                                                                                                                                                                                        | 6                                                                                                                                                                                                                                                                                               | 1                                                                                                                                                                                                                                                                                                     | 1                                                                                                                                                                                                                                                                    | 4,3302                                                                                                                                    | 7,1391                                                                                                                         | -0,4                                                                                                                                                   | 0                                                                                                                                                              | 1                                                                                                                                                                                                                                                  | 4,0                                                                                                      |
| Region 18                         | 42                                                                                                                                                                                       | 95                                                                                                              | 44,2                                                                                                                                                                                                                                                                                                                  | 0,4                                                                                                                                                                                                                                                                                                                        | 6                                                                                                                                                                                                                                                                                               | 1                                                                                                                                                                                                                                                                                                     | 1                                                                                                                                                                                                                                                                    | 1902,8                                                                                                                                    | 2735,1                                                                                                                         | -0,31                                                                                                                                                  | 0                                                                                                                                                              | 0                                                                                                                                                                                                                                                  | 2,4                                                                                                      |
| Region 19                         | 68                                                                                                                                                                                       | 637                                                                                                             | 10,7                                                                                                                                                                                                                                                                                                                  | 0,1                                                                                                                                                                                                                                                                                                                        | 6                                                                                                                                                                                                                                                                                               | 1                                                                                                                                                                                                                                                                                                     | 1                                                                                                                                                                                                                                                                    | 1150                                                                                                                                      | 574                                                                                                                            | 1                                                                                                                                                      | 1                                                                                                                                                              | 1                                                                                                                                                                                                                                                  | 4,1                                                                                                      |
| Region 20                         | 62                                                                                                                                                                                       | 129                                                                                                             | 48,1                                                                                                                                                                                                                                                                                                                  | 0,5                                                                                                                                                                                                                                                                                                                        | 7                                                                                                                                                                                                                                                                                               | 1                                                                                                                                                                                                                                                                                                     | 1                                                                                                                                                                                                                                                                    | 11,3                                                                                                                                      | 4,8                                                                                                                            | 1,35                                                                                                                                                   | 1                                                                                                                                                              | 0                                                                                                                                                                                                                                                  | 3,5                                                                                                      |
| Region 21                         | 274                                                                                                                                                                                      | 274                                                                                                             | 100,0                                                                                                                                                                                                                                                                                                                 | 1,0                                                                                                                                                                                                                                                                                                                        | 6                                                                                                                                                                                                                                                                                               | 1                                                                                                                                                                                                                                                                                                     | 1                                                                                                                                                                                                                                                                    | 20134,4                                                                                                                                   | 1959,74                                                                                                                        | 9,27                                                                                                                                                   | 1                                                                                                                                                              | 1                                                                                                                                                                                                                                                  | 5,0                                                                                                      |
| Region 22                         | 77                                                                                                                                                                                       | 79                                                                                                              | 97,5                                                                                                                                                                                                                                                                                                                  | 1,0                                                                                                                                                                                                                                                                                                                        | 6                                                                                                                                                                                                                                                                                               | 1                                                                                                                                                                                                                                                                                                     | 0                                                                                                                                                                                                                                                                    | 14,2                                                                                                                                      | 38,2                                                                                                                           | -0,63                                                                                                                                                  | 0                                                                                                                                                              | 1                                                                                                                                                                                                                                                  | 3,0                                                                                                      |
| Region 23                         | 794                                                                                                                                                                                      | 794                                                                                                             | 100,0                                                                                                                                                                                                                                                                                                                 | 1,0                                                                                                                                                                                                                                                                                                                        | 6                                                                                                                                                                                                                                                                                               | 1                                                                                                                                                                                                                                                                                                     | 1                                                                                                                                                                                                                                                                    | 780,39                                                                                                                                    | 708,38                                                                                                                         | 0,1                                                                                                                                                    | 1                                                                                                                                                              | 1                                                                                                                                                                                                                                                  | 5,0                                                                                                      |
| Region 24                         | 46                                                                                                                                                                                       | 51                                                                                                              | 90,2                                                                                                                                                                                                                                                                                                                  | 0,9                                                                                                                                                                                                                                                                                                                        | 6                                                                                                                                                                                                                                                                                               | 1                                                                                                                                                                                                                                                                                                     | 1                                                                                                                                                                                                                                                                    | 129,7                                                                                                                                     | 102,7                                                                                                                          | 0,26                                                                                                                                                   | 1                                                                                                                                                              | 1                                                                                                                                                                                                                                                  | 4,9                                                                                                      |
| Region 25                         | 264                                                                                                                                                                                      | 275                                                                                                             | 96,0                                                                                                                                                                                                                                                                                                                  | 1,0                                                                                                                                                                                                                                                                                                                        | 5                                                                                                                                                                                                                                                                                               | 0,7                                                                                                                                                                                                                                                                                                   | 1                                                                                                                                                                                                                                                                    | 773,4                                                                                                                                     | 660,7                                                                                                                          | 0,17                                                                                                                                                   | 1                                                                                                                                                              | 0                                                                                                                                                                                                                                                  | 3,7                                                                                                      |
| Region 26                         | 2310                                                                                                                                                                                     | 3558                                                                                                            | 64,9                                                                                                                                                                                                                                                                                                                  | 0,6                                                                                                                                                                                                                                                                                                                        | 6                                                                                                                                                                                                                                                                                               | 1                                                                                                                                                                                                                                                                                                     | 1                                                                                                                                                                                                                                                                    | 2155                                                                                                                                      | 4412                                                                                                                           | 0                                                                                                                                                      | 0                                                                                                                                                              | 1                                                                                                                                                                                                                                                  | 3,6                                                                                                      |

**Indicators of the regional rehabilitation systems development in Russia (2020)**

| Regions of the Russian Federation | Number of organizations providing rehabilitation and (or) habilitation services and included in the regional system regarding to the formation an integrated approach to its arrangement | Total number of organizations providing rehabilitation and (or) habilitation services and located in the region | The share of organizations providing rehabilitation and (or) habilitation services and included in the regional system regarding to the formation an integrated approach to its arrangement in the total number of organizations providing rehabilitation and (or) habilitation services and located in the region, % | The share of organizations providing rehabilitation and (or) habilitation services and included in the regional system regarding to the formation an integrated approach to its arrangement in the total number of organizations providing rehabilitation and (or) habilitation services and located in the region, points | Number of regional agencies in various fields of activities (healthcare, education, social protection, physical culture and sports, culture, labor and employment, information and communication) involved in the formation of an integrated approach to the arrangement of the regional system | Number of regional agencies in various fields of activity (healthcare, education, social protection, physical culture and sports, culture, labor and employment, information and communication) involved in the formation of an integrated approach to the arrangement of the regional system, points | Availability of the legal and methodological base of the regional system for forming an integrated approach to its arrangement, agreements on interaction between providers of rehabilitation and (or) habilitation measures (presence – 1 point, absence – 0 point) | Funding allocated for rehabilitation and habilitation measures to meet the needs of the disabled in the assessment period, million rubles | Funding allocated for rehabilitation and habilitation measures to meet the needs of PwD in the previous period, million rubles | The share of changes in funding allocated for rehabilitation and habilitation measures to meet the needs of PwD in comparison with the previous period | The share of changes in funding allocated for rehabilitation and habilitation measures to meet the needs of PwD in comparison with the previous period, points | Availability of the feasible regional recommendations on options for the provision of rehabilitation and habilitation measures for PwD (plan approved by agencies, certificates, co-financing, and others) (presence - 1 point, absence - 0 point) | The formation of an integrated approach to the organization of the regional system in the region, points |
|-----------------------------------|------------------------------------------------------------------------------------------------------------------------------------------------------------------------------------------|-----------------------------------------------------------------------------------------------------------------|-----------------------------------------------------------------------------------------------------------------------------------------------------------------------------------------------------------------------------------------------------------------------------------------------------------------------|----------------------------------------------------------------------------------------------------------------------------------------------------------------------------------------------------------------------------------------------------------------------------------------------------------------------------|-------------------------------------------------------------------------------------------------------------------------------------------------------------------------------------------------------------------------------------------------------------------------------------------------|-------------------------------------------------------------------------------------------------------------------------------------------------------------------------------------------------------------------------------------------------------------------------------------------------------|----------------------------------------------------------------------------------------------------------------------------------------------------------------------------------------------------------------------------------------------------------------------|-------------------------------------------------------------------------------------------------------------------------------------------|--------------------------------------------------------------------------------------------------------------------------------|--------------------------------------------------------------------------------------------------------------------------------------------------------|----------------------------------------------------------------------------------------------------------------------------------------------------------------|----------------------------------------------------------------------------------------------------------------------------------------------------------------------------------------------------------------------------------------------------|----------------------------------------------------------------------------------------------------------|
| Region 27                         | 312                                                                                                                                                                                      | 357                                                                                                             | 87,4                                                                                                                                                                                                                                                                                                                  | 0,9                                                                                                                                                                                                                                                                                                                        | 6                                                                                                                                                                                                                                                                                               | 1                                                                                                                                                                                                                                                                                                     | 1                                                                                                                                                                                                                                                                    | 355                                                                                                                                       | 123                                                                                                                            | 1,88                                                                                                                                                   | 1                                                                                                                                                              | 1                                                                                                                                                                                                                                                  | 4,9                                                                                                      |
| Region 28                         | 116                                                                                                                                                                                      | 116                                                                                                             | 100,0                                                                                                                                                                                                                                                                                                                 | 1,0                                                                                                                                                                                                                                                                                                                        | 7                                                                                                                                                                                                                                                                                               | 1                                                                                                                                                                                                                                                                                                     | 0                                                                                                                                                                                                                                                                    | 1358,45                                                                                                                                   | 1155,12                                                                                                                        | 0,17                                                                                                                                                   | 1                                                                                                                                                              | 0                                                                                                                                                                                                                                                  | 3,0                                                                                                      |
| Region 29                         | 440                                                                                                                                                                                      | 916                                                                                                             | 48,0                                                                                                                                                                                                                                                                                                                  | 0,5                                                                                                                                                                                                                                                                                                                        | 6                                                                                                                                                                                                                                                                                               | 1                                                                                                                                                                                                                                                                                                     | 1                                                                                                                                                                                                                                                                    | 377,31                                                                                                                                    | 862,77                                                                                                                         | -0,57                                                                                                                                                  | 0                                                                                                                                                              | 1                                                                                                                                                                                                                                                  | 3,5                                                                                                      |
| Region 30                         | 174                                                                                                                                                                                      | 174                                                                                                             | 100,0                                                                                                                                                                                                                                                                                                                 | 1,0                                                                                                                                                                                                                                                                                                                        | 6                                                                                                                                                                                                                                                                                               | 1                                                                                                                                                                                                                                                                                                     | 1                                                                                                                                                                                                                                                                    | 23                                                                                                                                        | 3                                                                                                                              | 6,66                                                                                                                                                   | 1                                                                                                                                                              | 0                                                                                                                                                                                                                                                  | 4,0                                                                                                      |
| Region 31                         | 58                                                                                                                                                                                       | 132                                                                                                             | 43,9                                                                                                                                                                                                                                                                                                                  | 0,4                                                                                                                                                                                                                                                                                                                        | 6                                                                                                                                                                                                                                                                                               | 1                                                                                                                                                                                                                                                                                                     | 1                                                                                                                                                                                                                                                                    | 233,55                                                                                                                                    | 281,63                                                                                                                         | -0,18                                                                                                                                                  | 0                                                                                                                                                              | 1                                                                                                                                                                                                                                                  | 3,4                                                                                                      |
| Region 32                         | 5                                                                                                                                                                                        | 5                                                                                                               | 100,0                                                                                                                                                                                                                                                                                                                 | 1,0                                                                                                                                                                                                                                                                                                                        | 6                                                                                                                                                                                                                                                                                               | 1                                                                                                                                                                                                                                                                                                     | 0                                                                                                                                                                                                                                                                    | 66,3                                                                                                                                      | 79,4                                                                                                                           | -0,17                                                                                                                                                  | 0                                                                                                                                                              | 0                                                                                                                                                                                                                                                  | 2,0                                                                                                      |
| Region 33                         | 478                                                                                                                                                                                      | 478                                                                                                             | 100,0                                                                                                                                                                                                                                                                                                                 | 1,0                                                                                                                                                                                                                                                                                                                        | 5                                                                                                                                                                                                                                                                                               | 0,7                                                                                                                                                                                                                                                                                                   | 1                                                                                                                                                                                                                                                                    | 170,8                                                                                                                                     | 170,8                                                                                                                          | 0                                                                                                                                                      | 0,5                                                                                                                                                            | 0                                                                                                                                                                                                                                                  | 3,2                                                                                                      |
| Region 34                         | 93                                                                                                                                                                                       | 192                                                                                                             | 48,4                                                                                                                                                                                                                                                                                                                  | 0,5                                                                                                                                                                                                                                                                                                                        | 6                                                                                                                                                                                                                                                                                               | 1                                                                                                                                                                                                                                                                                                     | 1                                                                                                                                                                                                                                                                    | 7,6                                                                                                                                       | 1,3                                                                                                                            | 4,54                                                                                                                                                   | 1                                                                                                                                                              | 1                                                                                                                                                                                                                                                  | 4,5                                                                                                      |
| Region 35                         | 6                                                                                                                                                                                        | 6                                                                                                               | 100,0                                                                                                                                                                                                                                                                                                                 | 1,0                                                                                                                                                                                                                                                                                                                        | 7                                                                                                                                                                                                                                                                                               | 1                                                                                                                                                                                                                                                                                                     | 0                                                                                                                                                                                                                                                                    | 13,321                                                                                                                                    | 11,32                                                                                                                          | 0,17                                                                                                                                                   | 1                                                                                                                                                              | 0                                                                                                                                                                                                                                                  | 3,0                                                                                                      |
| Region 36                         | 34                                                                                                                                                                                       | 204                                                                                                             | 16,7                                                                                                                                                                                                                                                                                                                  | 0,2                                                                                                                                                                                                                                                                                                                        | 6                                                                                                                                                                                                                                                                                               | 1                                                                                                                                                                                                                                                                                                     | 1                                                                                                                                                                                                                                                                    | 0,3                                                                                                                                       | 0,3                                                                                                                            | 0                                                                                                                                                      | 0,5                                                                                                                                                            | 0                                                                                                                                                                                                                                                  | 2,7                                                                                                      |
| Region 37                         | 62                                                                                                                                                                                       | 129                                                                                                             | 48,1                                                                                                                                                                                                                                                                                                                  | 0,5                                                                                                                                                                                                                                                                                                                        | 6                                                                                                                                                                                                                                                                                               | 1                                                                                                                                                                                                                                                                                                     | 1                                                                                                                                                                                                                                                                    | 1843,9                                                                                                                                    | 1724,1                                                                                                                         | 0,06                                                                                                                                                   | 1                                                                                                                                                              | 1                                                                                                                                                                                                                                                  | 4,5                                                                                                      |
| Region 38                         | 78                                                                                                                                                                                       | 83                                                                                                              | 94,0                                                                                                                                                                                                                                                                                                                  | 0,9                                                                                                                                                                                                                                                                                                                        | 6                                                                                                                                                                                                                                                                                               | 1                                                                                                                                                                                                                                                                                                     | 1                                                                                                                                                                                                                                                                    | 0,5                                                                                                                                       | 0,7                                                                                                                            | -0,29                                                                                                                                                  | 0                                                                                                                                                              | 1                                                                                                                                                                                                                                                  | 3,9                                                                                                      |
| Region 39                         | 633                                                                                                                                                                                      | 1566                                                                                                            | 40,4                                                                                                                                                                                                                                                                                                                  | 0,4                                                                                                                                                                                                                                                                                                                        | 6                                                                                                                                                                                                                                                                                               | 1                                                                                                                                                                                                                                                                                                     | 1                                                                                                                                                                                                                                                                    | 566                                                                                                                                       | 613                                                                                                                            | -0,08                                                                                                                                                  | 0                                                                                                                                                              | 0                                                                                                                                                                                                                                                  | 2,4                                                                                                      |

**Indicators of the regional rehabilitation systems development in Russia (2020)**

| Regions of the Russian Federation | Number of organizations providing rehabilitation and (or) habilitation services and included in the regional system regarding to the formation an integrated approach to its arrangement | Total number of organizations providing rehabilitation and (or) habilitation services and located in the region | The share of organizations providing rehabilitation and (or) habilitation services and included in the regional system regarding to the formation an integrated approach to its arrangement in the total number of organizations providing rehabilitation and (or) habilitation services and located in the region, % | The share of organizations providing rehabilitation and (or) habilitation services and included in the regional system regarding to the formation an integrated approach to its arrangement in the total number of organizations providing rehabilitation and (or) habilitation services and located in the region, points | Number of regional agencies in various fields of activities (healthcare, education, social protection, physical culture and sports, culture, labor and employment, information and communication) involved in the formation of an integrated approach to the arrangement of the regional system | Number of regional agencies in various fields of activity (healthcare, education, social protection, physical culture and sports, culture, labor and employment, information and communication) involved in the formation of an integrated approach to the arrangement of the regional system, points | Availability of the legal and methodological base of the regional system for forming an integrated approach to its arrangement, agreements on interaction between providers of rehabilitation and (or) habilitation measures (presence – 1 point, absence – 0 point) | Funding allocated for rehabilitation and habilitation measures to meet the needs of the disabled in the assessment period, million rubles | Funding allocated for rehabilitation and habilitation measures to meet the needs of PwD in the previous period, million rubles | The share of changes in funding allocated for rehabilitation and habilitation measures to meet the needs of PwD in comparison with the previous period | The share of changes in funding allocated for rehabilitation and habilitation measures to meet the needs of PwD in comparison with the previous period, points | Availability of the feasible regional recommendations on options for the provision of rehabilitation and habilitation measures for PwD (plan approved by agencies, certificates, co-financing, and others) (presence - 1 point, absence - 0 point) | The formation of an integrated approach to the organization of the regional system in the region, points |
|-----------------------------------|------------------------------------------------------------------------------------------------------------------------------------------------------------------------------------------|-----------------------------------------------------------------------------------------------------------------|-----------------------------------------------------------------------------------------------------------------------------------------------------------------------------------------------------------------------------------------------------------------------------------------------------------------------|----------------------------------------------------------------------------------------------------------------------------------------------------------------------------------------------------------------------------------------------------------------------------------------------------------------------------|-------------------------------------------------------------------------------------------------------------------------------------------------------------------------------------------------------------------------------------------------------------------------------------------------|-------------------------------------------------------------------------------------------------------------------------------------------------------------------------------------------------------------------------------------------------------------------------------------------------------|----------------------------------------------------------------------------------------------------------------------------------------------------------------------------------------------------------------------------------------------------------------------|-------------------------------------------------------------------------------------------------------------------------------------------|--------------------------------------------------------------------------------------------------------------------------------|--------------------------------------------------------------------------------------------------------------------------------------------------------|----------------------------------------------------------------------------------------------------------------------------------------------------------------|----------------------------------------------------------------------------------------------------------------------------------------------------------------------------------------------------------------------------------------------------|----------------------------------------------------------------------------------------------------------|
| Region 40                         | 34                                                                                                                                                                                       | 53                                                                                                              | 64,2                                                                                                                                                                                                                                                                                                                  | 0,6                                                                                                                                                                                                                                                                                                                        | 6                                                                                                                                                                                                                                                                                               | 1                                                                                                                                                                                                                                                                                                     | 1                                                                                                                                                                                                                                                                    | 15,12                                                                                                                                     | 36,32                                                                                                                          | -0,59                                                                                                                                                  | 0                                                                                                                                                              | 1                                                                                                                                                                                                                                                  | 3,6                                                                                                      |
| Region 41                         | 0                                                                                                                                                                                        | 473                                                                                                             | 0,0                                                                                                                                                                                                                                                                                                                   | 0,0                                                                                                                                                                                                                                                                                                                        | 5                                                                                                                                                                                                                                                                                               | 0,7                                                                                                                                                                                                                                                                                                   | 1                                                                                                                                                                                                                                                                    | 401,6                                                                                                                                     | 370                                                                                                                            | 0,08                                                                                                                                                   | 1                                                                                                                                                              | 1                                                                                                                                                                                                                                                  | 3,7                                                                                                      |
| Region 42                         | 51                                                                                                                                                                                       | 86                                                                                                              | 59,3                                                                                                                                                                                                                                                                                                                  | 0,6                                                                                                                                                                                                                                                                                                                        | 4                                                                                                                                                                                                                                                                                               | 0,7                                                                                                                                                                                                                                                                                                   | 0                                                                                                                                                                                                                                                                    | 9,2                                                                                                                                       | 0                                                                                                                              | 0                                                                                                                                                      | 1                                                                                                                                                              | 0                                                                                                                                                                                                                                                  | 2,3                                                                                                      |
| Region 43                         | 36                                                                                                                                                                                       | 64                                                                                                              | 56,3                                                                                                                                                                                                                                                                                                                  | 0,6                                                                                                                                                                                                                                                                                                                        | 6                                                                                                                                                                                                                                                                                               | 1                                                                                                                                                                                                                                                                                                     | 1                                                                                                                                                                                                                                                                    | 225                                                                                                                                       | 220                                                                                                                            | 0,02                                                                                                                                                   | 1                                                                                                                                                              | 1                                                                                                                                                                                                                                                  | 4,6                                                                                                      |
| Region 44                         | 161                                                                                                                                                                                      | 322                                                                                                             | 50,0                                                                                                                                                                                                                                                                                                                  | 0,5                                                                                                                                                                                                                                                                                                                        | 6                                                                                                                                                                                                                                                                                               | 1                                                                                                                                                                                                                                                                                                     | 1                                                                                                                                                                                                                                                                    | 38968,1                                                                                                                                   | 46160,9                                                                                                                        | -0,16                                                                                                                                                  | 0                                                                                                                                                              | 1                                                                                                                                                                                                                                                  | 3,5                                                                                                      |
| Region 45                         | 256                                                                                                                                                                                      | 295                                                                                                             | 86,8                                                                                                                                                                                                                                                                                                                  | 0,9                                                                                                                                                                                                                                                                                                                        | 6                                                                                                                                                                                                                                                                                               | 1                                                                                                                                                                                                                                                                                                     | 1                                                                                                                                                                                                                                                                    | 1                                                                                                                                         | 1                                                                                                                              | 0                                                                                                                                                      | 0,5                                                                                                                                                            | 0                                                                                                                                                                                                                                                  | 3,4                                                                                                      |
| Region 46                         | 18                                                                                                                                                                                       | 25                                                                                                              | 72,0                                                                                                                                                                                                                                                                                                                  | 0,7                                                                                                                                                                                                                                                                                                                        | 7                                                                                                                                                                                                                                                                                               | 1                                                                                                                                                                                                                                                                                                     | 0                                                                                                                                                                                                                                                                    | 17,5                                                                                                                                      | 17,63                                                                                                                          | -0,01                                                                                                                                                  | 0                                                                                                                                                              | 0                                                                                                                                                                                                                                                  | 1,7                                                                                                      |
| Region 47                         | 52                                                                                                                                                                                       | 108                                                                                                             | 48,1                                                                                                                                                                                                                                                                                                                  | 0,5                                                                                                                                                                                                                                                                                                                        | 6                                                                                                                                                                                                                                                                                               | 1                                                                                                                                                                                                                                                                                                     | 1                                                                                                                                                                                                                                                                    | 50,431                                                                                                                                    | 83,603                                                                                                                         | -0,4                                                                                                                                                   | 0                                                                                                                                                              | 0                                                                                                                                                                                                                                                  | 2,5                                                                                                      |
| Region 48                         | 400                                                                                                                                                                                      | 832                                                                                                             | 48,1                                                                                                                                                                                                                                                                                                                  | 0,5                                                                                                                                                                                                                                                                                                                        | 5                                                                                                                                                                                                                                                                                               | 0,7                                                                                                                                                                                                                                                                                                   | 1                                                                                                                                                                                                                                                                    | 18,7                                                                                                                                      | 0                                                                                                                              | 0                                                                                                                                                      | 1                                                                                                                                                              | 0                                                                                                                                                                                                                                                  | 3,2                                                                                                      |
| Region 49                         | 11                                                                                                                                                                                       | 12                                                                                                              | 91,7                                                                                                                                                                                                                                                                                                                  | 0,9                                                                                                                                                                                                                                                                                                                        | 6                                                                                                                                                                                                                                                                                               | 1                                                                                                                                                                                                                                                                                                     | 1                                                                                                                                                                                                                                                                    | 30,2                                                                                                                                      | 141,3                                                                                                                          | -0,79                                                                                                                                                  | 0                                                                                                                                                              | 1                                                                                                                                                                                                                                                  | 3,9                                                                                                      |
| Region 50                         | 17                                                                                                                                                                                       | 41                                                                                                              | 41,5                                                                                                                                                                                                                                                                                                                  | 0,4                                                                                                                                                                                                                                                                                                                        | 7                                                                                                                                                                                                                                                                                               | 1                                                                                                                                                                                                                                                                                                     | 1                                                                                                                                                                                                                                                                    | 31                                                                                                                                        | 24                                                                                                                             | 0,29                                                                                                                                                   | 1                                                                                                                                                              | 0                                                                                                                                                                                                                                                  | 3,4                                                                                                      |
| Region 51                         | 26                                                                                                                                                                                       | 1201                                                                                                            | 2,2                                                                                                                                                                                                                                                                                                                   | 0,0                                                                                                                                                                                                                                                                                                                        | 7                                                                                                                                                                                                                                                                                               | 1                                                                                                                                                                                                                                                                                                     | 1                                                                                                                                                                                                                                                                    | 21                                                                                                                                        | 10                                                                                                                             | 1,1                                                                                                                                                    | 1                                                                                                                                                              | 1                                                                                                                                                                                                                                                  | 4,0                                                                                                      |
| Region 52                         | 72                                                                                                                                                                                       | 96                                                                                                              | 75,0                                                                                                                                                                                                                                                                                                                  | 0,8                                                                                                                                                                                                                                                                                                                        | 6                                                                                                                                                                                                                                                                                               | 1                                                                                                                                                                                                                                                                                                     | 1                                                                                                                                                                                                                                                                    | 6,6                                                                                                                                       | 23,3                                                                                                                           | -1                                                                                                                                                     | 0                                                                                                                                                              | 1                                                                                                                                                                                                                                                  | 3,8                                                                                                      |

**Indicators of the regional rehabilitation systems development in Russia (2020)**

| Regions of the Russian Federation | Number of organizations providing rehabilitation and (or) habilitation services and included in the regional system regarding to the formation an integrated approach to its arrangement | Total number of organizations providing rehabilitation and (or) habilitation services and located in the region | The share of organizations providing rehabilitation and (or) habilitation services and included in the regional system regarding to the formation an integrated approach to its arrangement in the total number of organizations providing rehabilitation and (or) habilitation services and located in the region, % | The share of organizations providing rehabilitation and (or) habilitation services and included in the regional system regarding to the formation an integrated approach to its arrangement in the total number of organizations providing rehabilitation and (or) habilitation services and located in the region, points | Number of regional agencies in various fields of activities (healthcare, education, social protection, physical culture and sports, culture, labor and employment, information and communication) involved in the formation of an integrated approach to the arrangement of the regional system | Number of regional agencies in various fields of activity (healthcare, education, social protection, physical culture and sports, culture, labor and employment, information and communication) involved in the formation of an integrated approach to the arrangement of the regional system, points | Availability of the legal and methodological base of the regional system for forming an integrated approach to its arrangement, agreements on interaction between providers of rehabilitation and (or) habilitation measures (presence – 1 point, absence – 0 point) | Funding allocated for rehabilitation and habilitation measures to meet the needs of the disabled in the assessment period, million rubles | Funding allocated for rehabilitation and habilitation measures to meet the needs of PwD in the previous period, million rubles | The share of changes in funding allocated for rehabilitation and habilitation measures to meet the needs of PwD in comparison with the previous period | The share of changes in funding allocated for rehabilitation and habilitation measures to meet the needs of PwD in comparison with the previous period, points | Availability of the feasible regional recommendations on options for the provision of rehabilitation and habilitation measures for PwD (plan approved by agencies, certificates, co-financing, and others) (presence - 1 point, absence - 0 point) | The formation of an integrated approach to the organization of the regional system in the region, points |
|-----------------------------------|------------------------------------------------------------------------------------------------------------------------------------------------------------------------------------------|-----------------------------------------------------------------------------------------------------------------|-----------------------------------------------------------------------------------------------------------------------------------------------------------------------------------------------------------------------------------------------------------------------------------------------------------------------|----------------------------------------------------------------------------------------------------------------------------------------------------------------------------------------------------------------------------------------------------------------------------------------------------------------------------|-------------------------------------------------------------------------------------------------------------------------------------------------------------------------------------------------------------------------------------------------------------------------------------------------|-------------------------------------------------------------------------------------------------------------------------------------------------------------------------------------------------------------------------------------------------------------------------------------------------------|----------------------------------------------------------------------------------------------------------------------------------------------------------------------------------------------------------------------------------------------------------------------|-------------------------------------------------------------------------------------------------------------------------------------------|--------------------------------------------------------------------------------------------------------------------------------|--------------------------------------------------------------------------------------------------------------------------------------------------------|----------------------------------------------------------------------------------------------------------------------------------------------------------------|----------------------------------------------------------------------------------------------------------------------------------------------------------------------------------------------------------------------------------------------------|----------------------------------------------------------------------------------------------------------|
| Region 53                         | 76                                                                                                                                                                                       | 127                                                                                                             | 59,8                                                                                                                                                                                                                                                                                                                  | 0,6                                                                                                                                                                                                                                                                                                                        | 6                                                                                                                                                                                                                                                                                               | 1                                                                                                                                                                                                                                                                                                     | 1                                                                                                                                                                                                                                                                    | 4355,3                                                                                                                                    | 2453,2                                                                                                                         | 0,77                                                                                                                                                   | 1                                                                                                                                                              | 1                                                                                                                                                                                                                                                  | 4,6                                                                                                      |
| Region 54                         | 0                                                                                                                                                                                        | 567                                                                                                             | 0,0                                                                                                                                                                                                                                                                                                                   | 0,0                                                                                                                                                                                                                                                                                                                        | 7                                                                                                                                                                                                                                                                                               | 1                                                                                                                                                                                                                                                                                                     | 1                                                                                                                                                                                                                                                                    | 29                                                                                                                                        | 28                                                                                                                             | 0,03                                                                                                                                                   | 1                                                                                                                                                              | 1                                                                                                                                                                                                                                                  | 4,0                                                                                                      |
| Region 55                         | 178                                                                                                                                                                                      | 582                                                                                                             | 30,6                                                                                                                                                                                                                                                                                                                  | 0,3                                                                                                                                                                                                                                                                                                                        | 4                                                                                                                                                                                                                                                                                               | 0,7                                                                                                                                                                                                                                                                                                   | 0                                                                                                                                                                                                                                                                    | 0                                                                                                                                         | 0                                                                                                                              | 0                                                                                                                                                      | 0                                                                                                                                                              | 0                                                                                                                                                                                                                                                  | 1,0                                                                                                      |
| Region 56                         | 342                                                                                                                                                                                      | 522                                                                                                             | 65,5                                                                                                                                                                                                                                                                                                                  | 0,7                                                                                                                                                                                                                                                                                                                        | 6                                                                                                                                                                                                                                                                                               | 1                                                                                                                                                                                                                                                                                                     | 1                                                                                                                                                                                                                                                                    | 1406,7                                                                                                                                    | 1309,6                                                                                                                         | 0,07                                                                                                                                                   | 1                                                                                                                                                              | 1                                                                                                                                                                                                                                                  | 4,7                                                                                                      |
| Region 57                         | 148                                                                                                                                                                                      | 148                                                                                                             | 100,0                                                                                                                                                                                                                                                                                                                 | 1,0                                                                                                                                                                                                                                                                                                                        | 7                                                                                                                                                                                                                                                                                               | 1                                                                                                                                                                                                                                                                                                     | 1                                                                                                                                                                                                                                                                    | 14,3                                                                                                                                      | 0                                                                                                                              | 0                                                                                                                                                      | 1                                                                                                                                                              | 1                                                                                                                                                                                                                                                  | 5,0                                                                                                      |
| Region 58                         | 40                                                                                                                                                                                       | 64                                                                                                              | 62,5                                                                                                                                                                                                                                                                                                                  | 0,6                                                                                                                                                                                                                                                                                                                        | 6                                                                                                                                                                                                                                                                                               | 1                                                                                                                                                                                                                                                                                                     | 1                                                                                                                                                                                                                                                                    | 15,9                                                                                                                                      | 15,8                                                                                                                           | 0                                                                                                                                                      | 1                                                                                                                                                              | 1                                                                                                                                                                                                                                                  | 4,6                                                                                                      |
| Region 59                         | 58                                                                                                                                                                                       | 64                                                                                                              | 90,6                                                                                                                                                                                                                                                                                                                  | 0,9                                                                                                                                                                                                                                                                                                                        | 6                                                                                                                                                                                                                                                                                               | 1                                                                                                                                                                                                                                                                                                     | 1                                                                                                                                                                                                                                                                    | 1751,7                                                                                                                                    | 831,6                                                                                                                          | 1,1                                                                                                                                                    | 1                                                                                                                                                              | 1                                                                                                                                                                                                                                                  | 4,9                                                                                                      |
| Region 60                         | 1507                                                                                                                                                                                     | 1507                                                                                                            | 100,0                                                                                                                                                                                                                                                                                                                 | 1,0                                                                                                                                                                                                                                                                                                                        | 7                                                                                                                                                                                                                                                                                               | 1                                                                                                                                                                                                                                                                                                     | 0                                                                                                                                                                                                                                                                    | 101,1247                                                                                                                                  | 135,9558                                                                                                                       | -0,26                                                                                                                                                  | 0                                                                                                                                                              | 0                                                                                                                                                                                                                                                  | 2,0                                                                                                      |
| Region 61                         | 1245                                                                                                                                                                                     | 1245                                                                                                            | 100,0                                                                                                                                                                                                                                                                                                                 | 1,0                                                                                                                                                                                                                                                                                                                        | 6                                                                                                                                                                                                                                                                                               | 1                                                                                                                                                                                                                                                                                                     | 1                                                                                                                                                                                                                                                                    | 0                                                                                                                                         | 0                                                                                                                              | 0                                                                                                                                                      | 0                                                                                                                                                              | 0                                                                                                                                                                                                                                                  | 3,0                                                                                                      |
| Region 62                         | 9                                                                                                                                                                                        | 9                                                                                                               | 100,0                                                                                                                                                                                                                                                                                                                 | 1,0                                                                                                                                                                                                                                                                                                                        | 6                                                                                                                                                                                                                                                                                               | 1                                                                                                                                                                                                                                                                                                     | 1                                                                                                                                                                                                                                                                    | 982722,661                                                                                                                                | 924337,911                                                                                                                     | 0,06                                                                                                                                                   | 1                                                                                                                                                              | 1                                                                                                                                                                                                                                                  | 5,0                                                                                                      |
| Region 63                         | 233                                                                                                                                                                                      | 486                                                                                                             | 47,9                                                                                                                                                                                                                                                                                                                  | 0,5                                                                                                                                                                                                                                                                                                                        | 6                                                                                                                                                                                                                                                                                               | 1                                                                                                                                                                                                                                                                                                     | 1                                                                                                                                                                                                                                                                    | 5,4                                                                                                                                       | 1,5                                                                                                                            | 2,6                                                                                                                                                    | 1                                                                                                                                                              | 1                                                                                                                                                                                                                                                  | 4,5                                                                                                      |
| Region 64                         | 371                                                                                                                                                                                      | 372                                                                                                             | 99,7                                                                                                                                                                                                                                                                                                                  | 1,0                                                                                                                                                                                                                                                                                                                        | 6                                                                                                                                                                                                                                                                                               | 1                                                                                                                                                                                                                                                                                                     | 1                                                                                                                                                                                                                                                                    | 42,3                                                                                                                                      | 44,09                                                                                                                          | -0,05                                                                                                                                                  | 0                                                                                                                                                              | 1                                                                                                                                                                                                                                                  | 4,0                                                                                                      |
| Region 65                         | 55                                                                                                                                                                                       | 114                                                                                                             | 48,2                                                                                                                                                                                                                                                                                                                  | 0,5                                                                                                                                                                                                                                                                                                                        | 6                                                                                                                                                                                                                                                                                               | 1                                                                                                                                                                                                                                                                                                     | 1                                                                                                                                                                                                                                                                    | 3795,01                                                                                                                                   | 2385,64                                                                                                                        | 0,59                                                                                                                                                   | 1                                                                                                                                                              | 1                                                                                                                                                                                                                                                  | 4,5                                                                                                      |

**Indicators of the regional rehabilitation systems development in Russia (2020)**

| Regions of the Russian Federation | Number of organizations providing rehabilitation and (or) habilitation services and included in the regional system regarding to the formation an integrated approach to its arrangement | Total number of organizations providing rehabilitation and (or) habilitation services and located in the region | The share of organizations providing rehabilitation and (or) habilitation services and included in the regional system regarding to the formation an integrated approach to its arrangement in the total number of organizations providing rehabilitation and (or) habilitation services and located in the region, % | The share of organizations providing rehabilitation and (or) habilitation services and included in the regional system regarding to the formation an integrated approach to its arrangement in the total number of organizations providing rehabilitation and (or) habilitation services and located in the region, points | Number of regional agencies in various fields of activities (healthcare, education, social protection, physical culture and sports, culture, labor and employment, information and communication) involved in the formation of an integrated approach to the arrangement of the regional system | Number of regional agencies in various fields of activity (healthcare, education, social protection, physical culture and sports, culture, labor and employment, information and communication) involved in the formation of an integrated approach to the arrangement of the regional system, points | Availability of the legal and methodological base of the regional system for forming an integrated approach to its arrangement, agreements on interaction between providers of rehabilitation and (or) habilitation measures (presence – 1 point, absence – 0 point) | Funding allocated for rehabilitation and habilitation measures to meet the needs of the disabled in the assessment period, million rubles | Funding allocated for rehabilitation and habilitation measures to meet the needs of PwD in the previous period, million rubles | The share of changes in funding allocated for rehabilitation and habilitation measures to meet the needs of PwD in comparison with the previous period | The share of changes in funding allocated for rehabilitation and habilitation measures to meet the needs of PwD in comparison with the previous period, points | Availability of the feasible regional recommendations on options for the provision of rehabilitation and habilitation measures for PwD (plan approved by agencies, certificates, co-financing, and others) (presence - 1 point, absence - 0 point) | The formation of an integrated approach to the organization of the regional system in the region, points |
|-----------------------------------|------------------------------------------------------------------------------------------------------------------------------------------------------------------------------------------|-----------------------------------------------------------------------------------------------------------------|-----------------------------------------------------------------------------------------------------------------------------------------------------------------------------------------------------------------------------------------------------------------------------------------------------------------------|----------------------------------------------------------------------------------------------------------------------------------------------------------------------------------------------------------------------------------------------------------------------------------------------------------------------------|-------------------------------------------------------------------------------------------------------------------------------------------------------------------------------------------------------------------------------------------------------------------------------------------------|-------------------------------------------------------------------------------------------------------------------------------------------------------------------------------------------------------------------------------------------------------------------------------------------------------|----------------------------------------------------------------------------------------------------------------------------------------------------------------------------------------------------------------------------------------------------------------------|-------------------------------------------------------------------------------------------------------------------------------------------|--------------------------------------------------------------------------------------------------------------------------------|--------------------------------------------------------------------------------------------------------------------------------------------------------|----------------------------------------------------------------------------------------------------------------------------------------------------------------|----------------------------------------------------------------------------------------------------------------------------------------------------------------------------------------------------------------------------------------------------|----------------------------------------------------------------------------------------------------------|
| Region 66                         | 282                                                                                                                                                                                      | 509                                                                                                             | 55,4                                                                                                                                                                                                                                                                                                                  | 0,6                                                                                                                                                                                                                                                                                                                        | 6                                                                                                                                                                                                                                                                                               | 1                                                                                                                                                                                                                                                                                                     | 0                                                                                                                                                                                                                                                                    | 49133,4                                                                                                                                   | 95637,5                                                                                                                        | -0,49                                                                                                                                                  | 0                                                                                                                                                              | 0                                                                                                                                                                                                                                                  | 1,6                                                                                                      |
| Region 67                         | 1273                                                                                                                                                                                     | 1273                                                                                                            | 100,0                                                                                                                                                                                                                                                                                                                 | 1,0                                                                                                                                                                                                                                                                                                                        | 6                                                                                                                                                                                                                                                                                               | 1                                                                                                                                                                                                                                                                                                     | 1                                                                                                                                                                                                                                                                    | 0                                                                                                                                         | 0                                                                                                                              | 0,5                                                                                                                                                    | 0                                                                                                                                                              | 0                                                                                                                                                                                                                                                  | 3,0                                                                                                      |
| Region 68                         | 36                                                                                                                                                                                       | 671                                                                                                             | 5,4                                                                                                                                                                                                                                                                                                                   | 0,1                                                                                                                                                                                                                                                                                                                        | 6                                                                                                                                                                                                                                                                                               | 1                                                                                                                                                                                                                                                                                                     | 1                                                                                                                                                                                                                                                                    | 16,3                                                                                                                                      | 6,8                                                                                                                            | 0                                                                                                                                                      | 1                                                                                                                                                              | 0                                                                                                                                                                                                                                                  | 3,1                                                                                                      |
| Region 69                         | 28                                                                                                                                                                                       | 319                                                                                                             | 8,8                                                                                                                                                                                                                                                                                                                   | 0,1                                                                                                                                                                                                                                                                                                                        | 5                                                                                                                                                                                                                                                                                               | 0,7                                                                                                                                                                                                                                                                                                   | 1                                                                                                                                                                                                                                                                    | 2,1                                                                                                                                       | 1,2                                                                                                                            | 0,7                                                                                                                                                    | 1                                                                                                                                                              | 0                                                                                                                                                                                                                                                  | 2,8                                                                                                      |
| Region 70                         | 79                                                                                                                                                                                       | 94                                                                                                              | 84,0                                                                                                                                                                                                                                                                                                                  | 0,8                                                                                                                                                                                                                                                                                                                        | 7                                                                                                                                                                                                                                                                                               | 1                                                                                                                                                                                                                                                                                                     | 1                                                                                                                                                                                                                                                                    | 6,6                                                                                                                                       | 6,6                                                                                                                            | 0                                                                                                                                                      | 0,5                                                                                                                                                            | 0                                                                                                                                                                                                                                                  | 3,3                                                                                                      |
| Region 71                         | 11                                                                                                                                                                                       | 55                                                                                                              | 20,0                                                                                                                                                                                                                                                                                                                  | 0,2                                                                                                                                                                                                                                                                                                                        | 5                                                                                                                                                                                                                                                                                               | 0,7                                                                                                                                                                                                                                                                                                   | 0                                                                                                                                                                                                                                                                    | 0                                                                                                                                         | 0                                                                                                                              | 0                                                                                                                                                      | 0                                                                                                                                                              | 0                                                                                                                                                                                                                                                  | 0,9                                                                                                      |
| Region 72                         | 180                                                                                                                                                                                      | 180                                                                                                             | 100,0                                                                                                                                                                                                                                                                                                                 | 1,0                                                                                                                                                                                                                                                                                                                        | 6                                                                                                                                                                                                                                                                                               | 1                                                                                                                                                                                                                                                                                                     | 1                                                                                                                                                                                                                                                                    | 337,9                                                                                                                                     | 315,3                                                                                                                          | 0,07                                                                                                                                                   | 1                                                                                                                                                              | 1                                                                                                                                                                                                                                                  | 5,0                                                                                                      |
| Region 73                         | 32                                                                                                                                                                                       | 32                                                                                                              | 100,0                                                                                                                                                                                                                                                                                                                 | 1,0                                                                                                                                                                                                                                                                                                                        | 6                                                                                                                                                                                                                                                                                               | 1                                                                                                                                                                                                                                                                                                     | 0                                                                                                                                                                                                                                                                    | 257,8                                                                                                                                     | 248,6                                                                                                                          | 0                                                                                                                                                      | 1                                                                                                                                                              | 0                                                                                                                                                                                                                                                  | 3,0                                                                                                      |
| Region 74                         | 187                                                                                                                                                                                      | 187                                                                                                             | 100,0                                                                                                                                                                                                                                                                                                                 | 1,0                                                                                                                                                                                                                                                                                                                        | 6                                                                                                                                                                                                                                                                                               | 1                                                                                                                                                                                                                                                                                                     | 1                                                                                                                                                                                                                                                                    | 22,4                                                                                                                                      | 25,2                                                                                                                           | -0,12                                                                                                                                                  | 0                                                                                                                                                              | 1                                                                                                                                                                                                                                                  | 4,0                                                                                                      |
| Region 75                         | 77                                                                                                                                                                                       | 158                                                                                                             | 48,7                                                                                                                                                                                                                                                                                                                  | 0,5                                                                                                                                                                                                                                                                                                                        | 6                                                                                                                                                                                                                                                                                               | 1                                                                                                                                                                                                                                                                                                     | 1                                                                                                                                                                                                                                                                    | 29,1                                                                                                                                      | 0,5                                                                                                                            | 57,2                                                                                                                                                   | 1                                                                                                                                                              | 1                                                                                                                                                                                                                                                  | 4,5                                                                                                      |
| Region 76                         | 35                                                                                                                                                                                       | 195                                                                                                             | 17,9                                                                                                                                                                                                                                                                                                                  | 0,2                                                                                                                                                                                                                                                                                                                        | 6                                                                                                                                                                                                                                                                                               | 1                                                                                                                                                                                                                                                                                                     | 1                                                                                                                                                                                                                                                                    | 2175,5                                                                                                                                    | 2134,1                                                                                                                         | 0,01                                                                                                                                                   | 1                                                                                                                                                              | 1                                                                                                                                                                                                                                                  | 4,2                                                                                                      |
| Region 77                         | 8                                                                                                                                                                                        | 8                                                                                                               | 100,0                                                                                                                                                                                                                                                                                                                 | 1,0                                                                                                                                                                                                                                                                                                                        | 6                                                                                                                                                                                                                                                                                               | 1                                                                                                                                                                                                                                                                                                     | 0                                                                                                                                                                                                                                                                    | 0                                                                                                                                         | 0                                                                                                                              | 0,5                                                                                                                                                    | 0                                                                                                                                                              | 0                                                                                                                                                                                                                                                  | 2,0                                                                                                      |
| Region 78                         | 62                                                                                                                                                                                       | 129                                                                                                             | 48,1                                                                                                                                                                                                                                                                                                                  | 0,5                                                                                                                                                                                                                                                                                                                        | 6                                                                                                                                                                                                                                                                                               | 1                                                                                                                                                                                                                                                                                                     | 1                                                                                                                                                                                                                                                                    | 27,05                                                                                                                                     | 20,99                                                                                                                          | 0,28                                                                                                                                                   | 1                                                                                                                                                              | 1                                                                                                                                                                                                                                                  | 4,5                                                                                                      |

**Indicators of the regional rehabilitation systems development in Russia (2020)**

| Regions of the Russian Federation | Number of organizations providing rehabilitation and (or) habilitation services and included in the regional system regarding to the formation an integrated approach to its arrangement | Total number of organizations providing rehabilitation and (or) habilitation services and located in the region | The share of organizations providing rehabilitation and (or) habilitation services and included in the regional system regarding to the formation an integrated approach to its arrangement in the total number of organizations providing rehabilitation and (or) habilitation services and located in the region, % | The share of organizations providing rehabilitation and (or) habilitation services and included in the regional system regarding to the formation an integrated approach to its arrangement in the total number of organizations providing rehabilitation and (or) habilitation services and located in the region, points | Number of regional agencies in various fields of activities (healthcare, education, social protection, physical culture and sports, culture, labor and employment, information and communication) involved in the formation of an integrated approach to the arrangement of the regional system | Number of regional agencies in various fields of activity (healthcare, education, social protection, physical culture and sports, culture, labor and employment, information and communication) involved in the formation of an integrated approach to the arrangement of the regional system, points | Availability of the legal and methodological base of the regional system for forming an integrated approach to its arrangement, agreements on interaction between providers of rehabilitation and (or) habilitation measures (presence – 1 point, absence – 0 point) | Funding allocated for rehabilitation and habilitation measures to meet the needs of the disabled in the assessment period, million rubles | Funding allocated for rehabilitation and habilitation measures to meet the needs of PwD in the previous period, million rubles | The share of changes in funding allocated for rehabilitation and habilitation measures to meet the needs of PwD in comparison with the previous period | The share of changes in funding allocated for rehabilitation and habilitation measures to meet the needs of PwD in comparison with the previous period, points | Availability of the feasible regional recommendations on options for the provision of rehabilitation and habilitation measures for PwD (plan approved by agencies, certificates, co-financing, and others) (presence - 1 point, absence - 0 point) | The formation of an integrated approach to the organization of the regional system in the region, points |
|-----------------------------------|------------------------------------------------------------------------------------------------------------------------------------------------------------------------------------------|-----------------------------------------------------------------------------------------------------------------|-----------------------------------------------------------------------------------------------------------------------------------------------------------------------------------------------------------------------------------------------------------------------------------------------------------------------|----------------------------------------------------------------------------------------------------------------------------------------------------------------------------------------------------------------------------------------------------------------------------------------------------------------------------|-------------------------------------------------------------------------------------------------------------------------------------------------------------------------------------------------------------------------------------------------------------------------------------------------|-------------------------------------------------------------------------------------------------------------------------------------------------------------------------------------------------------------------------------------------------------------------------------------------------------|----------------------------------------------------------------------------------------------------------------------------------------------------------------------------------------------------------------------------------------------------------------------|-------------------------------------------------------------------------------------------------------------------------------------------|--------------------------------------------------------------------------------------------------------------------------------|--------------------------------------------------------------------------------------------------------------------------------------------------------|----------------------------------------------------------------------------------------------------------------------------------------------------------------|----------------------------------------------------------------------------------------------------------------------------------------------------------------------------------------------------------------------------------------------------|----------------------------------------------------------------------------------------------------------|
| Region 79                         | 5                                                                                                                                                                                        | 83                                                                                                              | 6,0                                                                                                                                                                                                                                                                                                                   | 0,1                                                                                                                                                                                                                                                                                                                        | 6                                                                                                                                                                                                                                                                                               | 1                                                                                                                                                                                                                                                                                                     | 1                                                                                                                                                                                                                                                                    | 311,3                                                                                                                                     | 281,7                                                                                                                          | 0,1                                                                                                                                                    | 1                                                                                                                                                              | 1                                                                                                                                                                                                                                                  | 4,1                                                                                                      |
| Region 80                         | 60                                                                                                                                                                                       | 81                                                                                                              | 74,1                                                                                                                                                                                                                                                                                                                  | 0,7                                                                                                                                                                                                                                                                                                                        | 6                                                                                                                                                                                                                                                                                               | 1                                                                                                                                                                                                                                                                                                     | 1                                                                                                                                                                                                                                                                    | 21,42                                                                                                                                     | 44,65                                                                                                                          | -0,55                                                                                                                                                  | 0                                                                                                                                                              | 1                                                                                                                                                                                                                                                  | 3,7                                                                                                      |
| Region 81                         | 891                                                                                                                                                                                      | 1114                                                                                                            | 80,0                                                                                                                                                                                                                                                                                                                  | 0,8                                                                                                                                                                                                                                                                                                                        | 6                                                                                                                                                                                                                                                                                               | 1                                                                                                                                                                                                                                                                                                     | 1                                                                                                                                                                                                                                                                    | 2000                                                                                                                                      | 1900                                                                                                                           | 0,05                                                                                                                                                   | 1                                                                                                                                                              | 1                                                                                                                                                                                                                                                  | 4,8                                                                                                      |
| Region 82                         | 116                                                                                                                                                                                      | 116                                                                                                             | 100,0                                                                                                                                                                                                                                                                                                                 | 1,0                                                                                                                                                                                                                                                                                                                        | 6                                                                                                                                                                                                                                                                                               | 1                                                                                                                                                                                                                                                                                                     | 1                                                                                                                                                                                                                                                                    | 0                                                                                                                                         | 0                                                                                                                              | 0                                                                                                                                                      | 0                                                                                                                                                              | 0                                                                                                                                                                                                                                                  | 3,0                                                                                                      |
| Region 83                         | 0                                                                                                                                                                                        | 0                                                                                                               | 0,0                                                                                                                                                                                                                                                                                                                   | 0,0                                                                                                                                                                                                                                                                                                                        | 3                                                                                                                                                                                                                                                                                               | 0,4                                                                                                                                                                                                                                                                                                   | 0                                                                                                                                                                                                                                                                    | 0                                                                                                                                         | 0                                                                                                                              | 0                                                                                                                                                      | 0                                                                                                                                                              | 0                                                                                                                                                                                                                                                  | 0,4                                                                                                      |

### Indicators of the regional rehabilitation systems development in Russia (2020)

| Regions of the Russian Federation | Total number of PwD (their legal representatives) who were interviewed on the quality of the provision of rehabilitation and (or) habilitation services | Number of PwD (their legal representatives) who are satisfied with the quality of the provision of rehabilitation and (or) habilitation services | The share of PwD (their legal representatives) who are satisfied with the quality of the provision of rehabilitation and (or) habilitation services in the total number of interviewed PwD (their legal representatives), % | The share of PwD (their legal representatives) who are satisfied with the quality of the provision of rehabilitation and (or) habilitation services in the total number of interviewed PwD (their legal representatives), % | The share of PwD (their legal representatives) who are satisfied with the quality of the provision of rehabilitation and (or) habilitation services in the total number of interviewed PwD (their legal representatives), points | Total number of PwD (their legal representatives) who were interviewed to evaluate the system for the provision of rehabilitation and (or) habilitation services | Number of PwD (their legal representatives) who evaluate positively the system for the provision of rehabilitation and (or) habilitation services | The share of PwD (their legal representatives) who evaluate positively the system for the provision of rehabilitation and (or) habilitation services in the total number of interviewed PwD (their legal representatives), % | The share of PwD (their legal representatives) who evaluate positively the system for the provision of rehabilitation and (or) habilitation services in the total number of interviewed PwD (their legal representatives), % | The share of PwD (their legal representatives) who evaluate positively the system for the provision of rehabilitation and (or) habilitation services in the total number of interviewed PwD (their legal representatives), points | The satisfaction of PwD (their legal representatives) with rehabilitation or habilitation measures (services), points |
|-----------------------------------|---------------------------------------------------------------------------------------------------------------------------------------------------------|--------------------------------------------------------------------------------------------------------------------------------------------------|-----------------------------------------------------------------------------------------------------------------------------------------------------------------------------------------------------------------------------|-----------------------------------------------------------------------------------------------------------------------------------------------------------------------------------------------------------------------------|----------------------------------------------------------------------------------------------------------------------------------------------------------------------------------------------------------------------------------|------------------------------------------------------------------------------------------------------------------------------------------------------------------|---------------------------------------------------------------------------------------------------------------------------------------------------|------------------------------------------------------------------------------------------------------------------------------------------------------------------------------------------------------------------------------|------------------------------------------------------------------------------------------------------------------------------------------------------------------------------------------------------------------------------|-----------------------------------------------------------------------------------------------------------------------------------------------------------------------------------------------------------------------------------|-----------------------------------------------------------------------------------------------------------------------|
| Region 1                          | 600                                                                                                                                                     | 515                                                                                                                                              | 0,85                                                                                                                                                                                                                        | 85,8                                                                                                                                                                                                                        | 0,8                                                                                                                                                                                                                              | 600                                                                                                                                                              | 508                                                                                                                                               | 0,84                                                                                                                                                                                                                         | 84,7                                                                                                                                                                                                                         | 0,8                                                                                                                                                                                                                               | 1,6                                                                                                                   |
| Region 2                          | 502                                                                                                                                                     | 331                                                                                                                                              | 0,65                                                                                                                                                                                                                        | 65,9                                                                                                                                                                                                                        | 0,6                                                                                                                                                                                                                              | 502                                                                                                                                                              | 314                                                                                                                                               | 0,62                                                                                                                                                                                                                         | 62,6                                                                                                                                                                                                                         | 0,6                                                                                                                                                                                                                               | 1,2                                                                                                                   |
| Region 3                          | 2350                                                                                                                                                    | 1271                                                                                                                                             | 0,5                                                                                                                                                                                                                         | 54,1                                                                                                                                                                                                                        | 0,5                                                                                                                                                                                                                              | 2350                                                                                                                                                             | 1319                                                                                                                                              | 0,5                                                                                                                                                                                                                          | 56,1                                                                                                                                                                                                                         | 0,5                                                                                                                                                                                                                               | 1                                                                                                                     |
| Region 4                          | 774                                                                                                                                                     | 698                                                                                                                                              | 0,9                                                                                                                                                                                                                         | 90,2                                                                                                                                                                                                                        | 0,9                                                                                                                                                                                                                              | 774                                                                                                                                                              | 627                                                                                                                                               | 0,81                                                                                                                                                                                                                         | 81,0                                                                                                                                                                                                                         | 0,8                                                                                                                                                                                                                               | 1,7                                                                                                                   |
| Region 5                          | 540                                                                                                                                                     | 513                                                                                                                                              | 0,95                                                                                                                                                                                                                        | 95,0                                                                                                                                                                                                                        | 0,9                                                                                                                                                                                                                              | 540                                                                                                                                                              | 507                                                                                                                                               | 0,93                                                                                                                                                                                                                         | 93,9                                                                                                                                                                                                                         | 0,9                                                                                                                                                                                                                               | 1,8                                                                                                                   |
| Region 6                          | 600                                                                                                                                                     | 432                                                                                                                                              | 0,72                                                                                                                                                                                                                        | 72,0                                                                                                                                                                                                                        | 0,7                                                                                                                                                                                                                              | 600                                                                                                                                                              | 418                                                                                                                                               | 0,69                                                                                                                                                                                                                         | 69,7                                                                                                                                                                                                                         | 0,6                                                                                                                                                                                                                               | 1,3                                                                                                                   |
| Region 7                          | 14574                                                                                                                                                   | 12542                                                                                                                                            | 0,86                                                                                                                                                                                                                        | 86,1                                                                                                                                                                                                                        | 0,8                                                                                                                                                                                                                              | 14574                                                                                                                                                            | 12542                                                                                                                                             | 0,86                                                                                                                                                                                                                         | 86,1                                                                                                                                                                                                                         | 0,8                                                                                                                                                                                                                               | 1,6                                                                                                                   |
| Region 8                          | 4019                                                                                                                                                    | 4002                                                                                                                                             | 0,9                                                                                                                                                                                                                         | 99,6                                                                                                                                                                                                                        | 0,9                                                                                                                                                                                                                              | 300                                                                                                                                                              | 161                                                                                                                                               | 0,53                                                                                                                                                                                                                         | 53,7                                                                                                                                                                                                                         | 0,5                                                                                                                                                                                                                               | 1,4                                                                                                                   |
| Region 9                          | 1349                                                                                                                                                    | 1222                                                                                                                                             | 0,9                                                                                                                                                                                                                         | 90,6                                                                                                                                                                                                                        | 0,9                                                                                                                                                                                                                              | 1349                                                                                                                                                             | 1197                                                                                                                                              | 0,88                                                                                                                                                                                                                         | 88,7                                                                                                                                                                                                                         | 0,8                                                                                                                                                                                                                               | 1,7                                                                                                                   |
| Region 10                         | 2207                                                                                                                                                    | 2172                                                                                                                                             | 0,98                                                                                                                                                                                                                        | 98,4                                                                                                                                                                                                                        | 0,9                                                                                                                                                                                                                              | 300                                                                                                                                                              | 255                                                                                                                                               | 0,85                                                                                                                                                                                                                         | 85,0                                                                                                                                                                                                                         | 0,8                                                                                                                                                                                                                               | 1,7                                                                                                                   |
| Region 11                         | 1920                                                                                                                                                    | 1075                                                                                                                                             | 0,55                                                                                                                                                                                                                        | 56,0                                                                                                                                                                                                                        | 0,5                                                                                                                                                                                                                              | 1300                                                                                                                                                             | 633                                                                                                                                               | 0,48                                                                                                                                                                                                                         | 48,7                                                                                                                                                                                                                         | 0,4                                                                                                                                                                                                                               | 0,9                                                                                                                   |
| Region 12                         | 10556                                                                                                                                                   | 10029                                                                                                                                            | 0,95                                                                                                                                                                                                                        | 95,0                                                                                                                                                                                                                        | 0,9                                                                                                                                                                                                                              | 480                                                                                                                                                              | 473                                                                                                                                               | 0,98                                                                                                                                                                                                                         | 98,5                                                                                                                                                                                                                         | 0,9                                                                                                                                                                                                                               | 1,8                                                                                                                   |
| Region 13                         | 7054                                                                                                                                                    | 6701                                                                                                                                             | 0,94                                                                                                                                                                                                                        | 95,0                                                                                                                                                                                                                        | 0,9                                                                                                                                                                                                                              | 2411                                                                                                                                                             | 2170                                                                                                                                              | 0,9                                                                                                                                                                                                                          | 90,0                                                                                                                                                                                                                         | 0,9                                                                                                                                                                                                                               | 1,8                                                                                                                   |
| Region 14                         | 929                                                                                                                                                     | 706                                                                                                                                              | 0,75                                                                                                                                                                                                                        | 76,0                                                                                                                                                                                                                        | 0,7                                                                                                                                                                                                                              | 0                                                                                                                                                                | 0                                                                                                                                                 | 0                                                                                                                                                                                                                            | 0,0                                                                                                                                                                                                                          | 0                                                                                                                                                                                                                                 | 0,7                                                                                                                   |
| Region 15                         | 2987                                                                                                                                                    | 2714                                                                                                                                             | 0,9                                                                                                                                                                                                                         | 90,9                                                                                                                                                                                                                        | 0,9                                                                                                                                                                                                                              | 354                                                                                                                                                              | 285                                                                                                                                               | 0,8                                                                                                                                                                                                                          | 80,5                                                                                                                                                                                                                         | 0,8                                                                                                                                                                                                                               | 1,7                                                                                                                   |
| Region 16                         | 515                                                                                                                                                     | 319                                                                                                                                              | 0,61                                                                                                                                                                                                                        | 61,9                                                                                                                                                                                                                        | 0,6                                                                                                                                                                                                                              | 515                                                                                                                                                              | 329                                                                                                                                               | 0,63                                                                                                                                                                                                                         | 63,9                                                                                                                                                                                                                         | 0,6                                                                                                                                                                                                                               | 1,2                                                                                                                   |
| Region 17                         | 1116                                                                                                                                                    | 948                                                                                                                                              | 0,84                                                                                                                                                                                                                        | 85,0                                                                                                                                                                                                                        | 0,8                                                                                                                                                                                                                              | 1116                                                                                                                                                             | 602                                                                                                                                               | 0,53                                                                                                                                                                                                                         | 53,9                                                                                                                                                                                                                         | 0,5                                                                                                                                                                                                                               | 1,3                                                                                                                   |
| Region 18                         | 6336                                                                                                                                                    | 6334                                                                                                                                             | 0,99                                                                                                                                                                                                                        | 100,0                                                                                                                                                                                                                       | 0,9                                                                                                                                                                                                                              | 6309                                                                                                                                                             | 6281                                                                                                                                              | 0,99                                                                                                                                                                                                                         | 99,6                                                                                                                                                                                                                         | 0,9                                                                                                                                                                                                                               | 1,8                                                                                                                   |
| Region 19                         | 20981                                                                                                                                                   | 20578                                                                                                                                            | 0,98                                                                                                                                                                                                                        | 98,1                                                                                                                                                                                                                        | 0,9                                                                                                                                                                                                                              | 20981                                                                                                                                                            | 20575                                                                                                                                             | 0,98                                                                                                                                                                                                                         | 98,1                                                                                                                                                                                                                         | 0,9                                                                                                                                                                                                                               | 1,8                                                                                                                   |
| Region 20                         | 336                                                                                                                                                     | 265                                                                                                                                              | 0,78                                                                                                                                                                                                                        | 78,9                                                                                                                                                                                                                        | 0,7                                                                                                                                                                                                                              | 336                                                                                                                                                              | 265                                                                                                                                               | 0,78                                                                                                                                                                                                                         | 78,9                                                                                                                                                                                                                         | 0,7                                                                                                                                                                                                                               | 1,4                                                                                                                   |

**Indicators of the regional rehabilitation systems development in Russia (2020)**

| Regions of the Russian Federation | Total number of PwD (their legal representatives) who were interviewed on the quality of the provision of rehabilitation and (or) habilitation services | Number of PwD (their legal representatives) who are satisfied with the quality of the provision of rehabilitation and (or) habilitation services | The share of PwD (their legal representatives) who are satisfied with the quality of the provision of rehabilitation and (or) habilitation services in the total number of interviewed PwD (their legal representatives), % | The share of PwD (their legal representatives) who are satisfied with the quality of the provision of rehabilitation and (or) habilitation services in the total number of interviewed PwD (their legal representatives), % | The share of PwD (their legal representatives) who are satisfied with the quality of the provision of rehabilitation and (or) habilitation services in the total number of interviewed PwD (their legal representatives), points | Total number of PwD (their legal representatives) who were interviewed to evaluate the system for the provision of rehabilitation and (or) habilitation services | Number of PwD (their legal representatives) who evaluate positively the system for the provision of rehabilitation and (or) habilitation services | The share of PwD (their legal representatives) who evaluate positively the system for the provision of rehabilitation and (or) habilitation services in the total number of interviewed PwD (their legal representatives), % | The share of PwD (their legal representatives) who evaluate positively the system for the provision of rehabilitation and (or) habilitation services in the total number of interviewed PwD (their legal representatives), % | The share of PwD (their legal representatives) who evaluate positively the system for the provision of rehabilitation and (or) habilitation services in the total number of interviewed PwD (their legal representatives), points | The satisfaction of PwD (their legal representatives) with rehabilitation or habilitation measures (services), points |
|-----------------------------------|---------------------------------------------------------------------------------------------------------------------------------------------------------|--------------------------------------------------------------------------------------------------------------------------------------------------|-----------------------------------------------------------------------------------------------------------------------------------------------------------------------------------------------------------------------------|-----------------------------------------------------------------------------------------------------------------------------------------------------------------------------------------------------------------------------|----------------------------------------------------------------------------------------------------------------------------------------------------------------------------------------------------------------------------------|------------------------------------------------------------------------------------------------------------------------------------------------------------------|---------------------------------------------------------------------------------------------------------------------------------------------------|------------------------------------------------------------------------------------------------------------------------------------------------------------------------------------------------------------------------------|------------------------------------------------------------------------------------------------------------------------------------------------------------------------------------------------------------------------------|-----------------------------------------------------------------------------------------------------------------------------------------------------------------------------------------------------------------------------------|-----------------------------------------------------------------------------------------------------------------------|
| Region 21                         | 5360                                                                                                                                                    | 5065                                                                                                                                             | 0,94                                                                                                                                                                                                                        | 94,5                                                                                                                                                                                                                        | 0,9                                                                                                                                                                                                                              | 5403                                                                                                                                                             | 4958                                                                                                                                              | 0,91                                                                                                                                                                                                                         | 91,8                                                                                                                                                                                                                         | 0,9                                                                                                                                                                                                                               | 1,8                                                                                                                   |
| Region 22                         | 19643                                                                                                                                                   | 19092                                                                                                                                            | 0,97                                                                                                                                                                                                                        | 97,2                                                                                                                                                                                                                        | 0,9                                                                                                                                                                                                                              | 19643                                                                                                                                                            | 19092                                                                                                                                             | 0,97                                                                                                                                                                                                                         | 97,2                                                                                                                                                                                                                         | 0,9                                                                                                                                                                                                                               | 1,8                                                                                                                   |
| Region 23                         | 5609                                                                                                                                                    | 5529                                                                                                                                             | 0,98                                                                                                                                                                                                                        | 98,6                                                                                                                                                                                                                        | 0,9                                                                                                                                                                                                                              | 79                                                                                                                                                               | 72                                                                                                                                                | 0,91                                                                                                                                                                                                                         | 91,1                                                                                                                                                                                                                         | 0,9                                                                                                                                                                                                                               | 1,8                                                                                                                   |
| Region 24                         | 500                                                                                                                                                     | 280                                                                                                                                              | 0,56                                                                                                                                                                                                                        | 56,0                                                                                                                                                                                                                        | 0,5                                                                                                                                                                                                                              | 500                                                                                                                                                              | 475                                                                                                                                               | 0,95                                                                                                                                                                                                                         | 95,0                                                                                                                                                                                                                         | 0,9                                                                                                                                                                                                                               | 1,4                                                                                                                   |
| Region 25                         | 2898                                                                                                                                                    | 1838                                                                                                                                             | 0,6                                                                                                                                                                                                                         | 63,4                                                                                                                                                                                                                        | 0,6                                                                                                                                                                                                                              | 2876                                                                                                                                                             | 2838                                                                                                                                              | 0,9                                                                                                                                                                                                                          | 98,7                                                                                                                                                                                                                         | 0,9                                                                                                                                                                                                                               | 1,5                                                                                                                   |
| Region 26                         | 33046                                                                                                                                                   | 25217                                                                                                                                            | 0,7                                                                                                                                                                                                                         | 76,3                                                                                                                                                                                                                        | 0,7                                                                                                                                                                                                                              | 33046                                                                                                                                                            | 32891                                                                                                                                             | 0,9                                                                                                                                                                                                                          | 99,5                                                                                                                                                                                                                         | 0,9                                                                                                                                                                                                                               | 1,6                                                                                                                   |
| Region 27                         | 222                                                                                                                                                     | 204                                                                                                                                              | 0,91                                                                                                                                                                                                                        | 91,9                                                                                                                                                                                                                        | 0,9                                                                                                                                                                                                                              | 222                                                                                                                                                              | 201                                                                                                                                               | 0,9                                                                                                                                                                                                                          | 90,5                                                                                                                                                                                                                         | 0,9                                                                                                                                                                                                                               | 1,8                                                                                                                   |
| Region 28                         | 9014                                                                                                                                                    | 8768                                                                                                                                             | 0,97                                                                                                                                                                                                                        | 97,3                                                                                                                                                                                                                        | 0,9                                                                                                                                                                                                                              | 734                                                                                                                                                              | 664                                                                                                                                               | 0,9                                                                                                                                                                                                                          | 90,5                                                                                                                                                                                                                         | 0,9                                                                                                                                                                                                                               | 1,8                                                                                                                   |
| Region 29                         | 4607                                                                                                                                                    | 4411                                                                                                                                             | 0,95                                                                                                                                                                                                                        | 95,8                                                                                                                                                                                                                        | 0,9                                                                                                                                                                                                                              | 7799                                                                                                                                                             | 6167                                                                                                                                              | 0,79                                                                                                                                                                                                                         | 79,1                                                                                                                                                                                                                         | 0,7                                                                                                                                                                                                                               | 1,6                                                                                                                   |
| Region 30                         | 2039                                                                                                                                                    | 1986                                                                                                                                             | 0,97                                                                                                                                                                                                                        | 97,4                                                                                                                                                                                                                        | 0,9                                                                                                                                                                                                                              | 2039                                                                                                                                                             | 1996                                                                                                                                              | 0,97                                                                                                                                                                                                                         | 97,9                                                                                                                                                                                                                         | 0,9                                                                                                                                                                                                                               | 1,8                                                                                                                   |
| Region 31                         | 1429                                                                                                                                                    | 1415                                                                                                                                             | 0,99                                                                                                                                                                                                                        | 99,0                                                                                                                                                                                                                        | 0,9                                                                                                                                                                                                                              | 1283                                                                                                                                                             | 1232                                                                                                                                              | 0,96                                                                                                                                                                                                                         | 96,0                                                                                                                                                                                                                         | 0,9                                                                                                                                                                                                                               | 1,8                                                                                                                   |
| Region 32                         | 2084                                                                                                                                                    | 2065                                                                                                                                             | 0,99                                                                                                                                                                                                                        | 99,1                                                                                                                                                                                                                        | 0,9                                                                                                                                                                                                                              | 2084                                                                                                                                                             | 2084                                                                                                                                              | 1                                                                                                                                                                                                                            | 100,0                                                                                                                                                                                                                        | 1                                                                                                                                                                                                                                 | 1,9                                                                                                                   |
| Region 33                         | 220                                                                                                                                                     | 206                                                                                                                                              | 0,93                                                                                                                                                                                                                        | 93,6                                                                                                                                                                                                                        | 0,9                                                                                                                                                                                                                              | 220                                                                                                                                                              | 202                                                                                                                                               | 0,91                                                                                                                                                                                                                         | 91,8                                                                                                                                                                                                                         | 0,9                                                                                                                                                                                                                               | 1,8                                                                                                                   |
| Region 34                         | 8632                                                                                                                                                    | 7723                                                                                                                                             | 0,89                                                                                                                                                                                                                        | 89,5                                                                                                                                                                                                                        | 0,8                                                                                                                                                                                                                              | 8632                                                                                                                                                             | 7875                                                                                                                                              | 0,91                                                                                                                                                                                                                         | 91,2                                                                                                                                                                                                                         | 0,9                                                                                                                                                                                                                               | 1,7                                                                                                                   |
| Region 35                         | 684                                                                                                                                                     | 509                                                                                                                                              | 0,74                                                                                                                                                                                                                        | 74,4                                                                                                                                                                                                                        | 0,7                                                                                                                                                                                                                              | 684                                                                                                                                                              | 438                                                                                                                                               | 0,64                                                                                                                                                                                                                         | 64,0                                                                                                                                                                                                                         | 0,6                                                                                                                                                                                                                               | 1,3                                                                                                                   |
| Region 36                         | 705                                                                                                                                                     | 501                                                                                                                                              | 0,71                                                                                                                                                                                                                        | 71,1                                                                                                                                                                                                                        | 0,7                                                                                                                                                                                                                              | 705                                                                                                                                                              | 501                                                                                                                                               | 0,71                                                                                                                                                                                                                         | 71,1                                                                                                                                                                                                                         | 0,7                                                                                                                                                                                                                               | 1,4                                                                                                                   |
| Region 37                         | 7602                                                                                                                                                    | 6353                                                                                                                                             | 0,83                                                                                                                                                                                                                        | 83,6                                                                                                                                                                                                                        | 0,8                                                                                                                                                                                                                              | 7602                                                                                                                                                             | 6250                                                                                                                                              | 0,82                                                                                                                                                                                                                         | 82,2                                                                                                                                                                                                                         | 0,8                                                                                                                                                                                                                               | 1,6                                                                                                                   |
| Region 38                         | 2517                                                                                                                                                    | 2517                                                                                                                                             | 1                                                                                                                                                                                                                           | 100,0                                                                                                                                                                                                                       | 1                                                                                                                                                                                                                                | 2517                                                                                                                                                             | 2504                                                                                                                                              | 0,99                                                                                                                                                                                                                         | 99,5                                                                                                                                                                                                                         | 0,9                                                                                                                                                                                                                               | 1,9                                                                                                                   |
| Region 39                         | 1937                                                                                                                                                    | 1697                                                                                                                                             | 0,87                                                                                                                                                                                                                        | 87,6                                                                                                                                                                                                                        | 0,8                                                                                                                                                                                                                              | 1905                                                                                                                                                             | 1644                                                                                                                                              | 0,86                                                                                                                                                                                                                         | 86,3                                                                                                                                                                                                                         | 0,8                                                                                                                                                                                                                               | 1,6                                                                                                                   |
| Region 40                         | 2687                                                                                                                                                    | 2633                                                                                                                                             | 0,97                                                                                                                                                                                                                        | 98,0                                                                                                                                                                                                                        | 0,9                                                                                                                                                                                                                              | 2667                                                                                                                                                             | 2649                                                                                                                                              | 0,99                                                                                                                                                                                                                         | 99,3                                                                                                                                                                                                                         | 0,9                                                                                                                                                                                                                               | 1,8                                                                                                                   |

**Indicators of the regional rehabilitation systems development in Russia (2020)**

| Regions of the Russian Federation | Total number of PwD (their legal representatives) who were interviewed on the quality of the provision of rehabilitation and (or) habilitation services | Number of PwD (their legal representatives) who are satisfied with the quality of the provision of rehabilitation and (or) habilitation services | The share of PwD (their legal representatives) who are satisfied with the quality of the provision of rehabilitation and (or) habilitation services in the total number of interviewed PwD (their legal representatives), % | The share of PwD (their legal representatives) who are satisfied with the quality of the provision of rehabilitation and (or) habilitation services in the total number of interviewed PwD (their legal representatives), % | The share of PwD (their legal representatives) who are satisfied with the quality of the provision of rehabilitation and (or) habilitation services in the total number of interviewed PwD (their legal representatives), points | Total number of PwD (their legal representatives) who were interviewed to evaluate the system for the provision of rehabilitation and (or) habilitation services | Number of PwD (their legal representatives) who evaluate positively the system for the provision of rehabilitation and (or) habilitation services | The share of PwD (their legal representatives) who evaluate positively the system for the provision of rehabilitation and (or) habilitation services in the total number of interviewed PwD (their legal representatives), % | The share of PwD (their legal representatives) who evaluate positively the system for the provision of rehabilitation and (or) habilitation services in the total number of interviewed PwD (their legal representatives), % | The share of PwD (their legal representatives) who evaluate positively the system for the provision of rehabilitation and (or) habilitation services in the total number of interviewed PwD (their legal representatives), points | The satisfaction of PwD (their legal representatives) with rehabilitation or habilitation measures (services), points |
|-----------------------------------|---------------------------------------------------------------------------------------------------------------------------------------------------------|--------------------------------------------------------------------------------------------------------------------------------------------------|-----------------------------------------------------------------------------------------------------------------------------------------------------------------------------------------------------------------------------|-----------------------------------------------------------------------------------------------------------------------------------------------------------------------------------------------------------------------------|----------------------------------------------------------------------------------------------------------------------------------------------------------------------------------------------------------------------------------|------------------------------------------------------------------------------------------------------------------------------------------------------------------|---------------------------------------------------------------------------------------------------------------------------------------------------|------------------------------------------------------------------------------------------------------------------------------------------------------------------------------------------------------------------------------|------------------------------------------------------------------------------------------------------------------------------------------------------------------------------------------------------------------------------|-----------------------------------------------------------------------------------------------------------------------------------------------------------------------------------------------------------------------------------|-----------------------------------------------------------------------------------------------------------------------|
| Region 41                         | 19718                                                                                                                                                   | 17874                                                                                                                                            | 0,9                                                                                                                                                                                                                         | 90,7                                                                                                                                                                                                                        | 0,9                                                                                                                                                                                                                              | 19718                                                                                                                                                            | 18036                                                                                                                                             | 0,91                                                                                                                                                                                                                         | 91,5                                                                                                                                                                                                                         | 0,9                                                                                                                                                                                                                               | 1,8                                                                                                                   |
| Region 42                         | 30137                                                                                                                                                   | 30137                                                                                                                                            | 1                                                                                                                                                                                                                           | 100,0                                                                                                                                                                                                                       | 1                                                                                                                                                                                                                                | 30137                                                                                                                                                            | 30137                                                                                                                                             | 1                                                                                                                                                                                                                            | 100,0                                                                                                                                                                                                                        | 1                                                                                                                                                                                                                                 | 2                                                                                                                     |
| Region 43                         | 17347                                                                                                                                                   | 15913                                                                                                                                            | 0,91                                                                                                                                                                                                                        | 91,7                                                                                                                                                                                                                        | 0,9                                                                                                                                                                                                                              | 17347                                                                                                                                                            | 15614                                                                                                                                             | 0,9                                                                                                                                                                                                                          | 90,0                                                                                                                                                                                                                         | 0,9                                                                                                                                                                                                                               | 1,8                                                                                                                   |
| Region 44                         | 13572                                                                                                                                                   | 12215                                                                                                                                            | 0,9                                                                                                                                                                                                                         | 90,0                                                                                                                                                                                                                        | 0,9                                                                                                                                                                                                                              | 13572                                                                                                                                                            | 12215                                                                                                                                             | 0,9                                                                                                                                                                                                                          | 90,0                                                                                                                                                                                                                         | 0,9                                                                                                                                                                                                                               | 1,8                                                                                                                   |
| Region 45                         | 4393                                                                                                                                                    | 4246                                                                                                                                             | 0,96                                                                                                                                                                                                                        | 96,7                                                                                                                                                                                                                        | 0,9                                                                                                                                                                                                                              | 4402                                                                                                                                                             | 4198                                                                                                                                              | 0,95                                                                                                                                                                                                                         | 95,4                                                                                                                                                                                                                         | 0,9                                                                                                                                                                                                                               | 1,8                                                                                                                   |
| Region 46                         | 6402                                                                                                                                                    | 6360                                                                                                                                             | 0,99                                                                                                                                                                                                                        | 99,3                                                                                                                                                                                                                        | 0,9                                                                                                                                                                                                                              | 6402                                                                                                                                                             | 6286                                                                                                                                              | 0,98                                                                                                                                                                                                                         | 98,2                                                                                                                                                                                                                         | 0,9                                                                                                                                                                                                                               | 1,8                                                                                                                   |
| Region 47                         | 500                                                                                                                                                     | 480                                                                                                                                              | 0,96                                                                                                                                                                                                                        | 96,0                                                                                                                                                                                                                        | 0,9                                                                                                                                                                                                                              | 500                                                                                                                                                              | 475                                                                                                                                               | 0,95                                                                                                                                                                                                                         | 95,0                                                                                                                                                                                                                         | 0,9                                                                                                                                                                                                                               | 1,8                                                                                                                   |
| Region 48                         | 5077                                                                                                                                                    | 4213                                                                                                                                             | 0,82                                                                                                                                                                                                                        | 83,0                                                                                                                                                                                                                        | 0,8                                                                                                                                                                                                                              | 5077                                                                                                                                                             | 4213                                                                                                                                              | 0,82                                                                                                                                                                                                                         | 83,0                                                                                                                                                                                                                         | 0,8                                                                                                                                                                                                                               | 1,6                                                                                                                   |
| Region 49                         | 985                                                                                                                                                     | 941                                                                                                                                              | 0,95                                                                                                                                                                                                                        | 95,5                                                                                                                                                                                                                        | 0,9                                                                                                                                                                                                                              | 985                                                                                                                                                              | 899                                                                                                                                               | 0,91                                                                                                                                                                                                                         | 91,3                                                                                                                                                                                                                         | 0,9                                                                                                                                                                                                                               | 1,8                                                                                                                   |
| Region 50                         | 3020                                                                                                                                                    | 3020                                                                                                                                             | 1                                                                                                                                                                                                                           | 100,0                                                                                                                                                                                                                       | 1                                                                                                                                                                                                                                | 3020                                                                                                                                                             | 3020                                                                                                                                              | 1                                                                                                                                                                                                                            | 100,0                                                                                                                                                                                                                        | 1                                                                                                                                                                                                                                 | 2                                                                                                                     |
| Region 51                         | 29285                                                                                                                                                   | 28859                                                                                                                                            | 0,98                                                                                                                                                                                                                        | 98,6                                                                                                                                                                                                                        | 0,9                                                                                                                                                                                                                              | 29041                                                                                                                                                            | 28489                                                                                                                                             | 0,98                                                                                                                                                                                                                         | 98,1                                                                                                                                                                                                                         | 0,9                                                                                                                                                                                                                               | 1,8                                                                                                                   |
| Region 52                         | 1109                                                                                                                                                    | 998                                                                                                                                              | 0,89                                                                                                                                                                                                                        | 90,0                                                                                                                                                                                                                        | 0,8                                                                                                                                                                                                                              | 1109                                                                                                                                                             | 1007                                                                                                                                              | 0,9                                                                                                                                                                                                                          | 90,8                                                                                                                                                                                                                         | 0,9                                                                                                                                                                                                                               | 1,7                                                                                                                   |
| Region 53                         | 2087                                                                                                                                                    | 2045                                                                                                                                             | 0,97                                                                                                                                                                                                                        | 98,0                                                                                                                                                                                                                        | 0,9                                                                                                                                                                                                                              | 2087                                                                                                                                                             | 2045                                                                                                                                              | 0,97                                                                                                                                                                                                                         | 98,0                                                                                                                                                                                                                         | 0,9                                                                                                                                                                                                                               | 1,8                                                                                                                   |
| Region 54                         | 4092                                                                                                                                                    | 3916                                                                                                                                             | 0,95                                                                                                                                                                                                                        | 95,7                                                                                                                                                                                                                        | 0,9                                                                                                                                                                                                                              | 3729                                                                                                                                                             | 3553                                                                                                                                              | 0,95                                                                                                                                                                                                                         | 95,3                                                                                                                                                                                                                         | 0,9                                                                                                                                                                                                                               | 1,8                                                                                                                   |
| Region 55                         | 22673                                                                                                                                                   | 21993                                                                                                                                            | 0,9                                                                                                                                                                                                                         | 97,0                                                                                                                                                                                                                        | 0,9                                                                                                                                                                                                                              | 650                                                                                                                                                              | 638                                                                                                                                               | 0,98                                                                                                                                                                                                                         | 98,2                                                                                                                                                                                                                         | 0,9                                                                                                                                                                                                                               | 1,8                                                                                                                   |
| Region 56                         | 1550                                                                                                                                                    | 1530                                                                                                                                             | 0,98                                                                                                                                                                                                                        | 98,7                                                                                                                                                                                                                        | 0,9                                                                                                                                                                                                                              | 1550                                                                                                                                                             | 1487                                                                                                                                              | 0,95                                                                                                                                                                                                                         | 95,9                                                                                                                                                                                                                         | 0,9                                                                                                                                                                                                                               | 1,8                                                                                                                   |
| Region 57                         | 17492                                                                                                                                                   | 17474                                                                                                                                            | 0,99                                                                                                                                                                                                                        | 99,9                                                                                                                                                                                                                        | 0,9                                                                                                                                                                                                                              | 17492                                                                                                                                                            | 17474                                                                                                                                             | 0,99                                                                                                                                                                                                                         | 99,9                                                                                                                                                                                                                         | 0,9                                                                                                                                                                                                                               | 1,8                                                                                                                   |
| Region 58                         | 315                                                                                                                                                     | 267                                                                                                                                              | 0,84                                                                                                                                                                                                                        | 84,8                                                                                                                                                                                                                        | 0,8                                                                                                                                                                                                                              | 315                                                                                                                                                              | 267                                                                                                                                               | 0,84                                                                                                                                                                                                                         | 84,8                                                                                                                                                                                                                         | 0,8                                                                                                                                                                                                                               | 1,6                                                                                                                   |
| Region 59                         | 2289                                                                                                                                                    | 2182                                                                                                                                             | 0,95                                                                                                                                                                                                                        | 95,3                                                                                                                                                                                                                        | 0,9                                                                                                                                                                                                                              | 2289                                                                                                                                                             | 2182                                                                                                                                              | 0,95                                                                                                                                                                                                                         | 95,3                                                                                                                                                                                                                         | 0,9                                                                                                                                                                                                                               | 1,8                                                                                                                   |
| Region 60                         | 3075                                                                                                                                                    | 2816                                                                                                                                             | 0,91                                                                                                                                                                                                                        | 91,6                                                                                                                                                                                                                        | 0,9                                                                                                                                                                                                                              | 3075                                                                                                                                                             | 2764                                                                                                                                              | 0,89                                                                                                                                                                                                                         | 89,9                                                                                                                                                                                                                         | 0,8                                                                                                                                                                                                                               | 1,7                                                                                                                   |

**Indicators of the regional rehabilitation systems development in Russia (2020)**

| Regions of the Russian Federation | Total number of PwD (their legal representatives) who were interviewed on the quality of the provision of rehabilitation and (or) habilitation services | Number of PwD (their legal representatives) who are satisfied with the quality of the provision of rehabilitation and (or) habilitation services | The share of PwD (their legal representatives) who are satisfied with the quality of the provision of rehabilitation and (or) habilitation services in the total number of interviewed PwD (their legal representatives), % | The share of PwD (their legal representatives) who are satisfied with the quality of the provision of rehabilitation and (or) habilitation services in the total number of interviewed PwD (their legal representatives), % | The share of PwD (their legal representatives) who are satisfied with the quality of the provision of rehabilitation and (or) habilitation services in the total number of interviewed PwD (their legal representatives), points | Total number of PwD (their legal representatives) who were interviewed to evaluate the system for the provision of rehabilitation and (or) habilitation services | Number of PwD (their legal representatives) who evaluate positively the system for the provision of rehabilitation and (or) habilitation services | The share of PwD (their legal representatives) who evaluate positively the system for the provision of rehabilitation and (or) habilitation services in the total number of interviewed PwD (their legal representatives), % | The share of PwD (their legal representatives) who evaluate positively the system for the provision of rehabilitation and (or) habilitation services in the total number of interviewed PwD (their legal representatives), % | The share of PwD (their legal representatives) who evaluate positively the system for the provision of rehabilitation and (or) habilitation services in the total number of interviewed PwD (their legal representatives), points | The satisfaction of PwD (their legal representatives) with rehabilitation or habilitation measures (services), points |
|-----------------------------------|---------------------------------------------------------------------------------------------------------------------------------------------------------|--------------------------------------------------------------------------------------------------------------------------------------------------|-----------------------------------------------------------------------------------------------------------------------------------------------------------------------------------------------------------------------------|-----------------------------------------------------------------------------------------------------------------------------------------------------------------------------------------------------------------------------|----------------------------------------------------------------------------------------------------------------------------------------------------------------------------------------------------------------------------------|------------------------------------------------------------------------------------------------------------------------------------------------------------------|---------------------------------------------------------------------------------------------------------------------------------------------------|------------------------------------------------------------------------------------------------------------------------------------------------------------------------------------------------------------------------------|------------------------------------------------------------------------------------------------------------------------------------------------------------------------------------------------------------------------------|-----------------------------------------------------------------------------------------------------------------------------------------------------------------------------------------------------------------------------------|-----------------------------------------------------------------------------------------------------------------------|
| Region 61                         | 21176                                                                                                                                                   | 20834                                                                                                                                            | 0,98                                                                                                                                                                                                                        | 98,4                                                                                                                                                                                                                        | 0,9                                                                                                                                                                                                                              | 20559                                                                                                                                                            | 20114                                                                                                                                             | 0,97                                                                                                                                                                                                                         | 97,8                                                                                                                                                                                                                         | 0,9                                                                                                                                                                                                                               | 1,8                                                                                                                   |
| Region 62                         | 13664                                                                                                                                                   | 13294                                                                                                                                            | 0,97                                                                                                                                                                                                                        | 97,3                                                                                                                                                                                                                        | 0,9                                                                                                                                                                                                                              | 11194                                                                                                                                                            | 11041                                                                                                                                             | 0,98                                                                                                                                                                                                                         | 98,6                                                                                                                                                                                                                         | 0,9                                                                                                                                                                                                                               | 1,8                                                                                                                   |
| Region 63                         | 756                                                                                                                                                     | 681                                                                                                                                              | 0,9                                                                                                                                                                                                                         | 90,1                                                                                                                                                                                                                        | 0,9                                                                                                                                                                                                                              | 744                                                                                                                                                              | 674                                                                                                                                               | 0,9                                                                                                                                                                                                                          | 90,6                                                                                                                                                                                                                         | 0,9                                                                                                                                                                                                                               | 1,8                                                                                                                   |
| Region 64                         | 3961                                                                                                                                                    | 2426                                                                                                                                             | 0,61                                                                                                                                                                                                                        | 61,3                                                                                                                                                                                                                        | 0,6                                                                                                                                                                                                                              | 1000                                                                                                                                                             | 676                                                                                                                                               | 0,67                                                                                                                                                                                                                         | 67,6                                                                                                                                                                                                                         | 0,6                                                                                                                                                                                                                               | 1,2                                                                                                                   |
| Region 65                         | 3353                                                                                                                                                    | 3290                                                                                                                                             | 0,98                                                                                                                                                                                                                        | 98,1                                                                                                                                                                                                                        | 0,9                                                                                                                                                                                                                              | 3353                                                                                                                                                             | 3353                                                                                                                                              | 1                                                                                                                                                                                                                            | 100,0                                                                                                                                                                                                                        | 1                                                                                                                                                                                                                                 | 1,9                                                                                                                   |
| Region 66                         | 3700                                                                                                                                                    | 3480                                                                                                                                             | 0,94                                                                                                                                                                                                                        | 94,1                                                                                                                                                                                                                        | 0,9                                                                                                                                                                                                                              | 3700                                                                                                                                                             | 2074                                                                                                                                              | 0,56                                                                                                                                                                                                                         | 56,1                                                                                                                                                                                                                         | 0,5                                                                                                                                                                                                                               | 1,4                                                                                                                   |
| Region 67                         | 600                                                                                                                                                     | 425                                                                                                                                              | 0,7                                                                                                                                                                                                                         | 70,8                                                                                                                                                                                                                        | 0,7                                                                                                                                                                                                                              | 600                                                                                                                                                              | 425                                                                                                                                               | 0,7                                                                                                                                                                                                                          | 70,8                                                                                                                                                                                                                         | 0,7                                                                                                                                                                                                                               | 1,4                                                                                                                   |
| Region 68                         | 1387                                                                                                                                                    | 1322                                                                                                                                             | 0,95                                                                                                                                                                                                                        | 95,3                                                                                                                                                                                                                        | 0,9                                                                                                                                                                                                                              | 1387                                                                                                                                                             | 1322                                                                                                                                              | 0,95                                                                                                                                                                                                                         | 95,3                                                                                                                                                                                                                         | 0,9                                                                                                                                                                                                                               | 1,8                                                                                                                   |
| Region 69                         | 2527                                                                                                                                                    | 2347                                                                                                                                             | 0,92                                                                                                                                                                                                                        | 92,9                                                                                                                                                                                                                        | 0,9                                                                                                                                                                                                                              | 2527                                                                                                                                                             | 2347                                                                                                                                              | 0,92                                                                                                                                                                                                                         | 92,9                                                                                                                                                                                                                         | 0,9                                                                                                                                                                                                                               | 1,8                                                                                                                   |
| Region 70                         | 380                                                                                                                                                     | 378                                                                                                                                              | 0,99                                                                                                                                                                                                                        | 99,5                                                                                                                                                                                                                        | 0,9                                                                                                                                                                                                                              | 380                                                                                                                                                              | 378                                                                                                                                               | 0,99                                                                                                                                                                                                                         | 99,5                                                                                                                                                                                                                         | 0,9                                                                                                                                                                                                                               | 1,8                                                                                                                   |
| Region 71                         | 100                                                                                                                                                     | 96                                                                                                                                               | 0,96                                                                                                                                                                                                                        | 96,0                                                                                                                                                                                                                        | 0,9                                                                                                                                                                                                                              | 100                                                                                                                                                              | 85                                                                                                                                                | 0,85                                                                                                                                                                                                                         | 85,0                                                                                                                                                                                                                         | 0,8                                                                                                                                                                                                                               | 1,7                                                                                                                   |
| Region 72                         | 858                                                                                                                                                     | 566                                                                                                                                              | 0,65                                                                                                                                                                                                                        | 66,0                                                                                                                                                                                                                        | 0,6                                                                                                                                                                                                                              | 239                                                                                                                                                              | 74                                                                                                                                                | 0,3                                                                                                                                                                                                                          | 31,0                                                                                                                                                                                                                         | 0,3                                                                                                                                                                                                                               | 0,9                                                                                                                   |
| Region 73                         | 794                                                                                                                                                     | 761                                                                                                                                              | 0,95                                                                                                                                                                                                                        | 95,8                                                                                                                                                                                                                        | 0,9                                                                                                                                                                                                                              | 794                                                                                                                                                              | 761                                                                                                                                               | 0,95                                                                                                                                                                                                                         | 95,8                                                                                                                                                                                                                         | 0,9                                                                                                                                                                                                                               | 1,8                                                                                                                   |
| Region 74                         | 59325                                                                                                                                                   | 52635                                                                                                                                            | 0,88                                                                                                                                                                                                                        | 88,7                                                                                                                                                                                                                        | 0,8                                                                                                                                                                                                                              | 59325                                                                                                                                                            | 52634                                                                                                                                             | 0,88                                                                                                                                                                                                                         | 88,7                                                                                                                                                                                                                         | 0,8                                                                                                                                                                                                                               | 1,6                                                                                                                   |
| Region 75                         | 40397                                                                                                                                                   | 30297                                                                                                                                            | 0,74                                                                                                                                                                                                                        | 75,0                                                                                                                                                                                                                        | 0,7                                                                                                                                                                                                                              | 40397                                                                                                                                                            | 30297                                                                                                                                             | 0,74                                                                                                                                                                                                                         | 75,0                                                                                                                                                                                                                         | 0,7                                                                                                                                                                                                                               | 1,4                                                                                                                   |
| Region 76                         | 24689                                                                                                                                                   | 24446                                                                                                                                            | 0,99                                                                                                                                                                                                                        | 99,0                                                                                                                                                                                                                        | 0,9                                                                                                                                                                                                                              | 550                                                                                                                                                              | 550                                                                                                                                               | 1                                                                                                                                                                                                                            | 100,0                                                                                                                                                                                                                        | 1                                                                                                                                                                                                                                 | 1,9                                                                                                                   |
| Region 77                         | 0                                                                                                                                                       | 0                                                                                                                                                | 0                                                                                                                                                                                                                           | 0,0                                                                                                                                                                                                                         | 0                                                                                                                                                                                                                                | 0                                                                                                                                                                | 0                                                                                                                                                 | 0                                                                                                                                                                                                                            | 0,0                                                                                                                                                                                                                          | 0                                                                                                                                                                                                                                 | 0                                                                                                                     |
| Region 78                         | 4685                                                                                                                                                    | 4238                                                                                                                                             | 0,9                                                                                                                                                                                                                         | 90,5                                                                                                                                                                                                                        | 0,9                                                                                                                                                                                                                              | 0                                                                                                                                                                | 0                                                                                                                                                 | 0                                                                                                                                                                                                                            | 0,0                                                                                                                                                                                                                          | 0                                                                                                                                                                                                                                 | 0,9                                                                                                                   |
| Region 79                         | 13949                                                                                                                                                   | 13893                                                                                                                                            | 0,99                                                                                                                                                                                                                        | 99,6                                                                                                                                                                                                                        | 0,9                                                                                                                                                                                                                              | 13949                                                                                                                                                            | 13891                                                                                                                                             | 0,99                                                                                                                                                                                                                         | 99,6                                                                                                                                                                                                                         | 0,9                                                                                                                                                                                                                               | 1,8                                                                                                                   |
| Region 80                         | 120                                                                                                                                                     | 106                                                                                                                                              | 0,8                                                                                                                                                                                                                         | 88,3                                                                                                                                                                                                                        | 0,8                                                                                                                                                                                                                              | 120                                                                                                                                                              | 84                                                                                                                                                | 0,7                                                                                                                                                                                                                          | 70,0                                                                                                                                                                                                                         | 0,7                                                                                                                                                                                                                               | 1,5                                                                                                                   |

**Indicators of the regional rehabilitation systems development in Russia (2020)**

| Regions of the Russian Federation | Total number of PwD (their legal representatives) who were interviewed on the quality of the provision of rehabilitation and (or) habilitation services | Number of PwD (their legal representatives) who are satisfied with the quality of the provision of rehabilitation and (or) habilitation services | The share of PwD (their legal representatives) who are satisfied with the quality of the provision of rehabilitation and (or) habilitation services in the total number of interviewed PwD (their legal representatives), % | The share of PwD (their legal representatives) who are satisfied with the quality of the provision of rehabilitation and (or) habilitation services in the total number of interviewed PwD (their legal representatives), % | The share of PwD (their legal representatives) who are satisfied with the quality of the provision of rehabilitation and (or) habilitation services in the total number of interviewed PwD (their legal representatives), points | Total number of PwD (their legal representatives) who were interviewed to evaluate the system for the provision of rehabilitation and (or) habilitation services | Number of PwD (their legal representatives) who evaluate positively the system for the provision of rehabilitation and (or) habilitation services | The share of PwD (their legal representatives) who evaluate positively the system for the provision of rehabilitation and (or) habilitation services in the total number of interviewed PwD (their legal representatives), % | The share of PwD (their legal representatives) who evaluate positively the system for the provision of rehabilitation and (or) habilitation services in the total number of interviewed PwD (their legal representatives), % | The share of PwD (their legal representatives) who evaluate positively the system for the provision of rehabilitation and (or) habilitation services in the total number of interviewed PwD (their legal representatives), points | The satisfaction of PwD (their legal representatives) with rehabilitation or habilitation measures (services), points |
|-----------------------------------|---------------------------------------------------------------------------------------------------------------------------------------------------------|--------------------------------------------------------------------------------------------------------------------------------------------------|-----------------------------------------------------------------------------------------------------------------------------------------------------------------------------------------------------------------------------|-----------------------------------------------------------------------------------------------------------------------------------------------------------------------------------------------------------------------------|----------------------------------------------------------------------------------------------------------------------------------------------------------------------------------------------------------------------------------|------------------------------------------------------------------------------------------------------------------------------------------------------------------|---------------------------------------------------------------------------------------------------------------------------------------------------|------------------------------------------------------------------------------------------------------------------------------------------------------------------------------------------------------------------------------|------------------------------------------------------------------------------------------------------------------------------------------------------------------------------------------------------------------------------|-----------------------------------------------------------------------------------------------------------------------------------------------------------------------------------------------------------------------------------|-----------------------------------------------------------------------------------------------------------------------|
| Region 81                         | 3704                                                                                                                                                    | 3636                                                                                                                                             | 0,9                                                                                                                                                                                                                         | 98,2                                                                                                                                                                                                                        | 0,9                                                                                                                                                                                                                              | 3704                                                                                                                                                             | 3636                                                                                                                                              | 0,9                                                                                                                                                                                                                          | 98,2                                                                                                                                                                                                                         | 0,9                                                                                                                                                                                                                               | 1,8                                                                                                                   |
| Region 82                         | 0                                                                                                                                                       | 0                                                                                                                                                | 0                                                                                                                                                                                                                           | 0,0                                                                                                                                                                                                                         | 0                                                                                                                                                                                                                                | 0                                                                                                                                                                | 0                                                                                                                                                 | 0                                                                                                                                                                                                                            | 0,0                                                                                                                                                                                                                          | 0                                                                                                                                                                                                                                 | 0                                                                                                                     |
| Region 83                         | 0                                                                                                                                                       | 0                                                                                                                                                | 0                                                                                                                                                                                                                           | 0,0                                                                                                                                                                                                                         | 0                                                                                                                                                                                                                                | 0                                                                                                                                                                | 0                                                                                                                                                 | 0                                                                                                                                                                                                                            | 0,0                                                                                                                                                                                                                          | 0                                                                                                                                                                                                                                 | 0                                                                                                                     |

**Indicators of the regional rehabilitation systems development in Russia (2020)**

| Regions of the Russian Federation | Total number of professionals providing rehabilitation and (or) habilitation measures for PwD | Number of professionals providing rehabilitation and (or) habilitation measures for PwD, who have updated skills and (or) been trained under programs including application of techniques on rehabilitation and (or) habilitation for PwD | The share of professionals providing rehabilitation and (or) habilitation measures for PwD, who have updated skills and (or) been trained under programs including application of techniques on rehabilitation and (or) habilitation for PwD in the total number of those professionals, % | The share of professionals providing rehabilitation and (or) habilitation measures for PwD, who have updated skills and (or) been trained under programs including application of techniques on rehabilitation and (or) habilitation for PwD in the total number of those professionals, % | The share of professionals providing rehabilitation and (or) habilitation measures for PwD, who have updated skills and (or) been trained under programs including application of techniques on rehabilitation and (or) habilitation for PwD in the total number of those professionals, points | The total number of professionals in educational organizations, who teach professionals providing rehabilitation and (or) habilitation measures | Number of professionals in educational organizations, who have been trained under programs on rehabilitation and habilitation for PwD for the last 5 years and teach professionals providing rehabilitation and (or) habilitation measures | The share of professionals in educational organizations, who have been trained under programs on rehabilitation and for PwD for the last 5 years and teach professionals providing rehabilitation and (or) habilitation measures in the total numbers of those professionals, % | The share of professionals in educational organizations, who have been trained under programs on rehabilitation and for PwD for the last 5 years and teach professionals providing rehabilitation and (or) habilitation measures in the total numbers of those professionals, % | The share of professionals in educational organizations, who have been trained under programs on rehabilitation and habilitation for PwD for the last 5 years and teach professionals providing rehabilitation and (or) habilitation measures in the total numbers of those professionals, points | The staffing of organizations providing rehabilitation and (or) habilitation services with specialists of the appropriate profile based on the needs of PwD in rehabilitation and (or) habilitation services, points |
|-----------------------------------|-----------------------------------------------------------------------------------------------|-------------------------------------------------------------------------------------------------------------------------------------------------------------------------------------------------------------------------------------------|--------------------------------------------------------------------------------------------------------------------------------------------------------------------------------------------------------------------------------------------------------------------------------------------|--------------------------------------------------------------------------------------------------------------------------------------------------------------------------------------------------------------------------------------------------------------------------------------------|-------------------------------------------------------------------------------------------------------------------------------------------------------------------------------------------------------------------------------------------------------------------------------------------------|-------------------------------------------------------------------------------------------------------------------------------------------------|--------------------------------------------------------------------------------------------------------------------------------------------------------------------------------------------------------------------------------------------|---------------------------------------------------------------------------------------------------------------------------------------------------------------------------------------------------------------------------------------------------------------------------------|---------------------------------------------------------------------------------------------------------------------------------------------------------------------------------------------------------------------------------------------------------------------------------|---------------------------------------------------------------------------------------------------------------------------------------------------------------------------------------------------------------------------------------------------------------------------------------------------|----------------------------------------------------------------------------------------------------------------------------------------------------------------------------------------------------------------------|
| Region 1                          | 5210                                                                                          | 891                                                                                                                                                                                                                                       | 0,17                                                                                                                                                                                                                                                                                       | 17,1                                                                                                                                                                                                                                                                                       | 0,2                                                                                                                                                                                                                                                                                             | 5                                                                                                                                               | 5                                                                                                                                                                                                                                          | 1                                                                                                                                                                                                                                                                               | 100,0                                                                                                                                                                                                                                                                           | 1                                                                                                                                                                                                                                                                                                 | 1,2                                                                                                                                                                                                                  |
| Region 2                          | 4051                                                                                          | 473                                                                                                                                                                                                                                       | 0,11                                                                                                                                                                                                                                                                                       | 11,7                                                                                                                                                                                                                                                                                       | 0,2                                                                                                                                                                                                                                                                                             | 22                                                                                                                                              | 22                                                                                                                                                                                                                                         | 1                                                                                                                                                                                                                                                                               | 100,0                                                                                                                                                                                                                                                                           | 1                                                                                                                                                                                                                                                                                                 | 1,2                                                                                                                                                                                                                  |
| Region 3                          | 989                                                                                           | 89                                                                                                                                                                                                                                        | 0,09                                                                                                                                                                                                                                                                                       | 9,0                                                                                                                                                                                                                                                                                        | 0,1                                                                                                                                                                                                                                                                                             | 0                                                                                                                                               | 0                                                                                                                                                                                                                                          | 0                                                                                                                                                                                                                                                                               | 0,0                                                                                                                                                                                                                                                                             | 0                                                                                                                                                                                                                                                                                                 | 0,1                                                                                                                                                                                                                  |
| Region 4                          | 4075                                                                                          | 2853                                                                                                                                                                                                                                      | 0,7                                                                                                                                                                                                                                                                                        | 70,0                                                                                                                                                                                                                                                                                       | 0,8                                                                                                                                                                                                                                                                                             | 63                                                                                                                                              | 44                                                                                                                                                                                                                                         | 0,69                                                                                                                                                                                                                                                                            | 69,8                                                                                                                                                                                                                                                                            | 0,7                                                                                                                                                                                                                                                                                               | 1,5                                                                                                                                                                                                                  |
| Region 5                          | 2876                                                                                          | 1609                                                                                                                                                                                                                                      | 0,5                                                                                                                                                                                                                                                                                        | 56,0                                                                                                                                                                                                                                                                                       | 0,5                                                                                                                                                                                                                                                                                             | 699                                                                                                                                             | 6                                                                                                                                                                                                                                          | 0,9                                                                                                                                                                                                                                                                             | 0,9                                                                                                                                                                                                                                                                             | 0                                                                                                                                                                                                                                                                                                 | 0,5                                                                                                                                                                                                                  |
| Region 6                          | 1565                                                                                          | 897                                                                                                                                                                                                                                       | 0,5                                                                                                                                                                                                                                                                                        | 57,3                                                                                                                                                                                                                                                                                       | 0,5                                                                                                                                                                                                                                                                                             | 426                                                                                                                                             | 426                                                                                                                                                                                                                                        | 1                                                                                                                                                                                                                                                                               | 100,0                                                                                                                                                                                                                                                                           | 1                                                                                                                                                                                                                                                                                                 | 1,5                                                                                                                                                                                                                  |
| Region 7                          | 2763                                                                                          | 1382                                                                                                                                                                                                                                      | 0,5                                                                                                                                                                                                                                                                                        | 50,0                                                                                                                                                                                                                                                                                       | 0,5                                                                                                                                                                                                                                                                                             | 89                                                                                                                                              | 61                                                                                                                                                                                                                                         | 0,68                                                                                                                                                                                                                                                                            | 68,5                                                                                                                                                                                                                                                                            | 0,7                                                                                                                                                                                                                                                                                               | 1,2                                                                                                                                                                                                                  |
| Region 8                          | 2630                                                                                          | 1391                                                                                                                                                                                                                                      | 0,52                                                                                                                                                                                                                                                                                       | 52,9                                                                                                                                                                                                                                                                                       | 0,5                                                                                                                                                                                                                                                                                             | 164                                                                                                                                             | 164                                                                                                                                                                                                                                        | 1                                                                                                                                                                                                                                                                               | 100,0                                                                                                                                                                                                                                                                           | 1                                                                                                                                                                                                                                                                                                 | 1,5                                                                                                                                                                                                                  |
| Region 9                          | 1005                                                                                          | 385                                                                                                                                                                                                                                       | 0,38                                                                                                                                                                                                                                                                                       | 38,3                                                                                                                                                                                                                                                                                       | 0,3                                                                                                                                                                                                                                                                                             | 1680                                                                                                                                            | 1295                                                                                                                                                                                                                                       | 0,77                                                                                                                                                                                                                                                                            | 77,1                                                                                                                                                                                                                                                                            | 0,8                                                                                                                                                                                                                                                                                               | 1,1                                                                                                                                                                                                                  |
| Region 10                         | 2513                                                                                          | 2270                                                                                                                                                                                                                                      | 0,9                                                                                                                                                                                                                                                                                        | 90,3                                                                                                                                                                                                                                                                                       | 1                                                                                                                                                                                                                                                                                               | 1600                                                                                                                                            | 300                                                                                                                                                                                                                                        | 0,18                                                                                                                                                                                                                                                                            | 18,8                                                                                                                                                                                                                                                                            | 0,2                                                                                                                                                                                                                                                                                               | 1,2                                                                                                                                                                                                                  |
| Region 11                         | 776                                                                                           | 217                                                                                                                                                                                                                                       | 0,27                                                                                                                                                                                                                                                                                       | 28,0                                                                                                                                                                                                                                                                                       | 0,3                                                                                                                                                                                                                                                                                             | 14285                                                                                                                                           | 10000                                                                                                                                                                                                                                      | 0,7                                                                                                                                                                                                                                                                             | 70,0                                                                                                                                                                                                                                                                            | 0,8                                                                                                                                                                                                                                                                                               | 1,1                                                                                                                                                                                                                  |
| Region 12                         | 2253                                                                                          | 928                                                                                                                                                                                                                                       | 0,41                                                                                                                                                                                                                                                                                       | 41,2                                                                                                                                                                                                                                                                                       | 0,5                                                                                                                                                                                                                                                                                             | 66                                                                                                                                              | 45                                                                                                                                                                                                                                         | 0,68                                                                                                                                                                                                                                                                            | 68,2                                                                                                                                                                                                                                                                            | 0,7                                                                                                                                                                                                                                                                                               | 1,2                                                                                                                                                                                                                  |

**Indicators of the regional rehabilitation systems development in Russia (2020)**

| Regions of the Russian Federation | Total number of professionals providing rehabilitation and (or) habilitation measures for PwD | Number of professionals providing rehabilitation and (or) habilitation measures for PwD, who have updated skills and (or) been trained under programs including application of techniques on rehabilitation and (or) habilitation for PwD | The share of professionals providing rehabilitation and (or) habilitation measures for PwD, who have updated skills and (or) been trained under programs including application of techniques on rehabilitation and (or) habilitation for PwD in the total number of those professionals, % | The share of professionals providing rehabilitation and (or) habilitation measures for PwD, who have updated skills and (or) been trained under programs including application of techniques on rehabilitation and (or) habilitation for PwD in the total number of those professionals, % | The share of professionals providing rehabilitation and (or) habilitation measures for PwD, who have updated skills and (or) been trained under programs including application of techniques on rehabilitation and (or) habilitation for PwD in the total number of those professionals, points | The total number of professionals in educational organizations, who teach professionals providing rehabilitation and (or) habilitation measures | Number of professionals in educational organizations, who have been trained under programs on rehabilitation and habilitation for PwD for the last 5 years and teach professionals providing rehabilitation and (or) habilitation measures | The share of professionals in educational organizations, who have been trained under programs on rehabilitation and for PwD for the last 5 years and teach professionals providing rehabilitation and (or) habilitation measures in the total numbers of those professionals, % | The share of professionals in educational organizations, who have been trained under programs on rehabilitation and for PwD for the last 5 years and teach professionals providing rehabilitation and (or) habilitation measures in the total numbers of those professionals, % | The share of professionals in educational organizations, who have been trained under programs on rehabilitation and habilitation for PwD for the last 5 years and teach professionals providing rehabilitation and (or) habilitation measures in the total numbers of those professionals, points | The staffing of organizations providing rehabilitation and (or) habilitation services with specialists of the appropriate profile based on the needs of PwD in rehabilitation and (or) habilitation services, points |
|-----------------------------------|-----------------------------------------------------------------------------------------------|-------------------------------------------------------------------------------------------------------------------------------------------------------------------------------------------------------------------------------------------|--------------------------------------------------------------------------------------------------------------------------------------------------------------------------------------------------------------------------------------------------------------------------------------------|--------------------------------------------------------------------------------------------------------------------------------------------------------------------------------------------------------------------------------------------------------------------------------------------|-------------------------------------------------------------------------------------------------------------------------------------------------------------------------------------------------------------------------------------------------------------------------------------------------|-------------------------------------------------------------------------------------------------------------------------------------------------|--------------------------------------------------------------------------------------------------------------------------------------------------------------------------------------------------------------------------------------------|---------------------------------------------------------------------------------------------------------------------------------------------------------------------------------------------------------------------------------------------------------------------------------|---------------------------------------------------------------------------------------------------------------------------------------------------------------------------------------------------------------------------------------------------------------------------------|---------------------------------------------------------------------------------------------------------------------------------------------------------------------------------------------------------------------------------------------------------------------------------------------------|----------------------------------------------------------------------------------------------------------------------------------------------------------------------------------------------------------------------|
| Region 13                         | 3048                                                                                          | 2237                                                                                                                                                                                                                                      | 0,73                                                                                                                                                                                                                                                                                       | 73,4                                                                                                                                                                                                                                                                                       | 0,8                                                                                                                                                                                                                                                                                             | 7                                                                                                                                               | 7                                                                                                                                                                                                                                          | 1                                                                                                                                                                                                                                                                               | 100,0                                                                                                                                                                                                                                                                           | 1                                                                                                                                                                                                                                                                                                 | 1,8                                                                                                                                                                                                                  |
| Region 14                         | 3622                                                                                          | 254                                                                                                                                                                                                                                       | 0,07                                                                                                                                                                                                                                                                                       | 7,0                                                                                                                                                                                                                                                                                        | 0,1                                                                                                                                                                                                                                                                                             | 10                                                                                                                                              | 0                                                                                                                                                                                                                                          | 0                                                                                                                                                                                                                                                                               | 0,0                                                                                                                                                                                                                                                                             | 0                                                                                                                                                                                                                                                                                                 | 0,1                                                                                                                                                                                                                  |
| Region 15                         | 1904                                                                                          | 1580                                                                                                                                                                                                                                      | 0,82                                                                                                                                                                                                                                                                                       | 83,0                                                                                                                                                                                                                                                                                       | 0,8                                                                                                                                                                                                                                                                                             | 18                                                                                                                                              | 10                                                                                                                                                                                                                                         | 0,55                                                                                                                                                                                                                                                                            | 55,6                                                                                                                                                                                                                                                                            | 0,5                                                                                                                                                                                                                                                                                               | 1,3                                                                                                                                                                                                                  |
| Region 16                         | 1570                                                                                          | 699                                                                                                                                                                                                                                       | 0,44                                                                                                                                                                                                                                                                                       | 44,5                                                                                                                                                                                                                                                                                       | 0,5                                                                                                                                                                                                                                                                                             | 151                                                                                                                                             | 117                                                                                                                                                                                                                                        | 0,77                                                                                                                                                                                                                                                                            | 77,5                                                                                                                                                                                                                                                                            | 0,8                                                                                                                                                                                                                                                                                               | 1,3                                                                                                                                                                                                                  |
| Region 17                         | 462                                                                                           | 272                                                                                                                                                                                                                                       | 0,58                                                                                                                                                                                                                                                                                       | 58,9                                                                                                                                                                                                                                                                                       | 0,5                                                                                                                                                                                                                                                                                             | 0                                                                                                                                               | 0                                                                                                                                                                                                                                          | 0                                                                                                                                                                                                                                                                               | 0,0                                                                                                                                                                                                                                                                             | 0                                                                                                                                                                                                                                                                                                 | 0,5                                                                                                                                                                                                                  |
| Region 18                         | 2301                                                                                          | 870                                                                                                                                                                                                                                       | 0,37                                                                                                                                                                                                                                                                                       | 37,8                                                                                                                                                                                                                                                                                       | 0,3                                                                                                                                                                                                                                                                                             | 299                                                                                                                                             | 294                                                                                                                                                                                                                                        | 0,98                                                                                                                                                                                                                                                                            | 98,3                                                                                                                                                                                                                                                                            | 1                                                                                                                                                                                                                                                                                                 | 1,3                                                                                                                                                                                                                  |
| Region 19                         | 3277                                                                                          | 533                                                                                                                                                                                                                                       | 0,16                                                                                                                                                                                                                                                                                       | 16,3                                                                                                                                                                                                                                                                                       | 0,2                                                                                                                                                                                                                                                                                             | 1216                                                                                                                                            | 929                                                                                                                                                                                                                                        | 0,76                                                                                                                                                                                                                                                                            | 76,4                                                                                                                                                                                                                                                                            | 0,8                                                                                                                                                                                                                                                                                               | 1                                                                                                                                                                                                                    |
| Region 20                         | 1502                                                                                          | 855                                                                                                                                                                                                                                       | 0,56                                                                                                                                                                                                                                                                                       | 56,9                                                                                                                                                                                                                                                                                       | 0,5                                                                                                                                                                                                                                                                                             | 4875                                                                                                                                            | 789                                                                                                                                                                                                                                        | 0,16                                                                                                                                                                                                                                                                            | 16,2                                                                                                                                                                                                                                                                            | 0,2                                                                                                                                                                                                                                                                                               | 0,7                                                                                                                                                                                                                  |
| Region 21                         | 4736                                                                                          | 1523                                                                                                                                                                                                                                      | 0,32                                                                                                                                                                                                                                                                                       | 32,2                                                                                                                                                                                                                                                                                       | 0,3                                                                                                                                                                                                                                                                                             | 14463                                                                                                                                           | 12530                                                                                                                                                                                                                                      | 0,86                                                                                                                                                                                                                                                                            | 86,6                                                                                                                                                                                                                                                                            | 0,8                                                                                                                                                                                                                                                                                               | 1,1                                                                                                                                                                                                                  |
| Region 22                         | 411                                                                                           | 236                                                                                                                                                                                                                                       | 0,57                                                                                                                                                                                                                                                                                       | 57,4                                                                                                                                                                                                                                                                                       | 0,5                                                                                                                                                                                                                                                                                             | 275                                                                                                                                             | 275                                                                                                                                                                                                                                        | 1                                                                                                                                                                                                                                                                               | 100,0                                                                                                                                                                                                                                                                           | 1                                                                                                                                                                                                                                                                                                 | 1,5                                                                                                                                                                                                                  |
| Region 23                         | 2963                                                                                          | 1107                                                                                                                                                                                                                                      | 0,37                                                                                                                                                                                                                                                                                       | 37,4                                                                                                                                                                                                                                                                                       | 0,3                                                                                                                                                                                                                                                                                             | 30                                                                                                                                              | 30                                                                                                                                                                                                                                         | 1                                                                                                                                                                                                                                                                               | 100,0                                                                                                                                                                                                                                                                           | 1                                                                                                                                                                                                                                                                                                 | 1,3                                                                                                                                                                                                                  |
| Region 24                         | 655                                                                                           | 333                                                                                                                                                                                                                                       | 0,5                                                                                                                                                                                                                                                                                        | 50,8                                                                                                                                                                                                                                                                                       | 0,5                                                                                                                                                                                                                                                                                             | 0                                                                                                                                               | 0                                                                                                                                                                                                                                          | 0                                                                                                                                                                                                                                                                               | 0,0                                                                                                                                                                                                                                                                             | 0                                                                                                                                                                                                                                                                                                 | 0,5                                                                                                                                                                                                                  |

**Indicators of the regional rehabilitation systems development in Russia (2020)**

| Regions of the Russian Federation | Total number of professionals providing rehabilitation and (or) habilitation measures for PwD | Number of professionals providing rehabilitation and (or) habilitation measures for PwD, who have updated skills and (or) been trained under programs including application of techniques on rehabilitation and (or) habilitation for PwD | The share of professionals providing rehabilitation and (or) habilitation measures for PwD, who have updated skills and (or) been trained under programs including application of techniques on rehabilitation and (or) habilitation for PwD in the total number of those professionals, % | The share of professionals providing rehabilitation and (or) habilitation measures for PwD, who have updated skills and (or) been trained under programs including application of techniques on rehabilitation and (or) habilitation for PwD in the total number of those professionals, % | The share of professionals providing rehabilitation and (or) habilitation measures for PwD, who have updated skills and (or) been trained under programs including application of techniques on rehabilitation and (or) habilitation for PwD in the total number of those professionals, points | The total number of professionals in educational organizations, who teach professionals providing rehabilitation and (or) habilitation measures | Number of professionals in educational organizations, who have been trained under programs on rehabilitation and habilitation for PwD for the last 5 years and teach professionals providing rehabilitation and (or) habilitation measures | The share of professionals in educational organizations, who have been trained under programs on rehabilitation and for PwD for the last 5 years and teach professionals providing rehabilitation and (or) habilitation measures in the total numbers of those professionals, % | The share of professionals in educational organizations, who have been trained under programs on rehabilitation and for PwD for the last 5 years and teach professionals providing rehabilitation and (or) habilitation measures in the total numbers of those professionals, % | The share of professionals in educational organizations, who have been trained under programs on rehabilitation and habilitation for PwD for the last 5 years and teach professionals providing rehabilitation and (or) habilitation measures in the total numbers of those professionals, points | The staffing of organizations providing rehabilitation and (or) habilitation services with specialists of the appropriate profile based on the needs of PwD in rehabilitation and (or) habilitation services, points |
|-----------------------------------|-----------------------------------------------------------------------------------------------|-------------------------------------------------------------------------------------------------------------------------------------------------------------------------------------------------------------------------------------------|--------------------------------------------------------------------------------------------------------------------------------------------------------------------------------------------------------------------------------------------------------------------------------------------|--------------------------------------------------------------------------------------------------------------------------------------------------------------------------------------------------------------------------------------------------------------------------------------------|-------------------------------------------------------------------------------------------------------------------------------------------------------------------------------------------------------------------------------------------------------------------------------------------------|-------------------------------------------------------------------------------------------------------------------------------------------------|--------------------------------------------------------------------------------------------------------------------------------------------------------------------------------------------------------------------------------------------|---------------------------------------------------------------------------------------------------------------------------------------------------------------------------------------------------------------------------------------------------------------------------------|---------------------------------------------------------------------------------------------------------------------------------------------------------------------------------------------------------------------------------------------------------------------------------|---------------------------------------------------------------------------------------------------------------------------------------------------------------------------------------------------------------------------------------------------------------------------------------------------|----------------------------------------------------------------------------------------------------------------------------------------------------------------------------------------------------------------------|
| Region 25                         | 216                                                                                           | 77                                                                                                                                                                                                                                        | 0,3                                                                                                                                                                                                                                                                                        | 35,7                                                                                                                                                                                                                                                                                       | 0,3                                                                                                                                                                                                                                                                                             | 1285                                                                                                                                            | 1285                                                                                                                                                                                                                                       | 1                                                                                                                                                                                                                                                                               | 100,0                                                                                                                                                                                                                                                                           | 1                                                                                                                                                                                                                                                                                                 | 1,3                                                                                                                                                                                                                  |
| Region 26                         | 16722                                                                                         | 6445                                                                                                                                                                                                                                      | 0,3                                                                                                                                                                                                                                                                                        | 38,5                                                                                                                                                                                                                                                                                       | 0,3                                                                                                                                                                                                                                                                                             | 4744                                                                                                                                            | 2206                                                                                                                                                                                                                                       | 0,46                                                                                                                                                                                                                                                                            | 46,5                                                                                                                                                                                                                                                                            | 0,5                                                                                                                                                                                                                                                                                               | 0,8                                                                                                                                                                                                                  |
| Region 27                         | 1691                                                                                          | 778                                                                                                                                                                                                                                       | 0,46                                                                                                                                                                                                                                                                                       | 46,0                                                                                                                                                                                                                                                                                       | 0,5                                                                                                                                                                                                                                                                                             | 50                                                                                                                                              | 50                                                                                                                                                                                                                                         | 1                                                                                                                                                                                                                                                                               | 100,0                                                                                                                                                                                                                                                                           | 1                                                                                                                                                                                                                                                                                                 | 1,5                                                                                                                                                                                                                  |
| Region 28                         | 1933                                                                                          | 1206                                                                                                                                                                                                                                      | 0,7                                                                                                                                                                                                                                                                                        | 62,4                                                                                                                                                                                                                                                                                       | 0,7                                                                                                                                                                                                                                                                                             | 1737                                                                                                                                            | 680                                                                                                                                                                                                                                        | 0,39                                                                                                                                                                                                                                                                            | 39,2                                                                                                                                                                                                                                                                            | 0,3                                                                                                                                                                                                                                                                                               | 1                                                                                                                                                                                                                    |
| Region 29                         | 23757                                                                                         | 8151                                                                                                                                                                                                                                      | 0,34                                                                                                                                                                                                                                                                                       | 34,3                                                                                                                                                                                                                                                                                       | 0,3                                                                                                                                                                                                                                                                                             | 987                                                                                                                                             | 987                                                                                                                                                                                                                                        | 1                                                                                                                                                                                                                                                                               | 100,0                                                                                                                                                                                                                                                                           | 1                                                                                                                                                                                                                                                                                                 | 1,3                                                                                                                                                                                                                  |
| Region 30                         | 2084                                                                                          | 557                                                                                                                                                                                                                                       | 0,3                                                                                                                                                                                                                                                                                        | 26,7                                                                                                                                                                                                                                                                                       | 0,3                                                                                                                                                                                                                                                                                             | 3505                                                                                                                                            | 1415                                                                                                                                                                                                                                       | 0,4                                                                                                                                                                                                                                                                             | 40,4                                                                                                                                                                                                                                                                            | 0,5                                                                                                                                                                                                                                                                                               | 0,8                                                                                                                                                                                                                  |
| Region 31                         | 3448                                                                                          | 2911                                                                                                                                                                                                                                      | 0,84                                                                                                                                                                                                                                                                                       | 84,4                                                                                                                                                                                                                                                                                       | 0,8                                                                                                                                                                                                                                                                                             | 6986                                                                                                                                            | 2836                                                                                                                                                                                                                                       | 0,4                                                                                                                                                                                                                                                                             | 40,6                                                                                                                                                                                                                                                                            | 0,5                                                                                                                                                                                                                                                                                               | 1,3                                                                                                                                                                                                                  |
| Region 32                         | 179                                                                                           | 35                                                                                                                                                                                                                                        | 0,2                                                                                                                                                                                                                                                                                        | 19,6                                                                                                                                                                                                                                                                                       | 0,2                                                                                                                                                                                                                                                                                             | 1069                                                                                                                                            | 1069                                                                                                                                                                                                                                       | 1                                                                                                                                                                                                                                                                               | 100,0                                                                                                                                                                                                                                                                           | 1                                                                                                                                                                                                                                                                                                 | 1,2                                                                                                                                                                                                                  |
| Region 33                         | 2031                                                                                          | 992                                                                                                                                                                                                                                       | 0,48                                                                                                                                                                                                                                                                                       | 48,8                                                                                                                                                                                                                                                                                       | 0,5                                                                                                                                                                                                                                                                                             | 116                                                                                                                                             | 85                                                                                                                                                                                                                                         | 0,73                                                                                                                                                                                                                                                                            | 73,3                                                                                                                                                                                                                                                                            | 0,8                                                                                                                                                                                                                                                                                               | 1,3                                                                                                                                                                                                                  |
| Region 34                         | 1689                                                                                          | 1234                                                                                                                                                                                                                                      | 0,73                                                                                                                                                                                                                                                                                       | 73,1                                                                                                                                                                                                                                                                                       | 0,8                                                                                                                                                                                                                                                                                             | 27                                                                                                                                              | 27                                                                                                                                                                                                                                         | 1                                                                                                                                                                                                                                                                               | 100,0                                                                                                                                                                                                                                                                           | 1                                                                                                                                                                                                                                                                                                 | 1,8                                                                                                                                                                                                                  |
| Region 35                         | 112                                                                                           | 39                                                                                                                                                                                                                                        | 0,34                                                                                                                                                                                                                                                                                       | 34,8                                                                                                                                                                                                                                                                                       | 0,3                                                                                                                                                                                                                                                                                             | 0                                                                                                                                               | 0                                                                                                                                                                                                                                          | 0                                                                                                                                                                                                                                                                               | 0,0                                                                                                                                                                                                                                                                             | 0                                                                                                                                                                                                                                                                                                 | 0,3                                                                                                                                                                                                                  |
| Region 36                         | 369                                                                                           | 303                                                                                                                                                                                                                                       | 0,82                                                                                                                                                                                                                                                                                       | 82,1                                                                                                                                                                                                                                                                                       | 0,8                                                                                                                                                                                                                                                                                             | 198                                                                                                                                             | 198                                                                                                                                                                                                                                        | 1                                                                                                                                                                                                                                                                               | 100,0                                                                                                                                                                                                                                                                           | 1                                                                                                                                                                                                                                                                                                 | 1,8                                                                                                                                                                                                                  |

**Indicators of the regional rehabilitation systems development in Russia (2020)**

| Regions of the Russian Federation | Total number of professionals providing rehabilitation and (or) habilitation measures for PwD | Number of professionals providing rehabilitation and (or) habilitation measures for PwD, who have updated skills and (or) been trained under programs including application of techniques on rehabilitation and (or) habilitation for PwD | The share of professionals providing rehabilitation and (or) habilitation measures for PwD, who have updated skills and (or) been trained under programs including application of techniques on rehabilitation and (or) habilitation for PwD in the total number of those professionals, % | The share of professionals providing rehabilitation and (or) habilitation measures for PwD, who have updated skills and (or) been trained under programs including application of techniques on rehabilitation and (or) habilitation for PwD in the total number of those professionals, % | The share of professionals providing rehabilitation and (or) habilitation measures for PwD, who have updated skills and (or) been trained under programs including application of techniques on rehabilitation and (or) habilitation for PwD in the total number of those professionals, points | The total number of professionals in educational organizations, who teach professionals providing rehabilitation and (or) habilitation measures | Number of professionals in educational organizations, who have been trained under programs on rehabilitation and habilitation for PwD for the last 5 years and teach professionals providing rehabilitation and (or) habilitation measures | The share of professionals in educational organizations, who have been trained under programs on rehabilitation and for PwD for the last 5 years and teach professionals providing rehabilitation and (or) habilitation measures in the total numbers of those professionals, % | The share of professionals in educational organizations, who have been trained under programs on rehabilitation and for PwD for the last 5 years and teach professionals providing rehabilitation and (or) habilitation measures in the total numbers of those professionals, % | The share of professionals in educational organizations, who have been trained under programs on rehabilitation and habilitation for PwD for the last 5 years and teach professionals providing rehabilitation and (or) habilitation measures in the total numbers of those professionals, points | The staffing of organizations providing rehabilitation and (or) habilitation services with specialists of the appropriate profile based on the needs of PwD in rehabilitation and (or) habilitation services, points |
|-----------------------------------|-----------------------------------------------------------------------------------------------|-------------------------------------------------------------------------------------------------------------------------------------------------------------------------------------------------------------------------------------------|--------------------------------------------------------------------------------------------------------------------------------------------------------------------------------------------------------------------------------------------------------------------------------------------|--------------------------------------------------------------------------------------------------------------------------------------------------------------------------------------------------------------------------------------------------------------------------------------------|-------------------------------------------------------------------------------------------------------------------------------------------------------------------------------------------------------------------------------------------------------------------------------------------------|-------------------------------------------------------------------------------------------------------------------------------------------------|--------------------------------------------------------------------------------------------------------------------------------------------------------------------------------------------------------------------------------------------|---------------------------------------------------------------------------------------------------------------------------------------------------------------------------------------------------------------------------------------------------------------------------------|---------------------------------------------------------------------------------------------------------------------------------------------------------------------------------------------------------------------------------------------------------------------------------|---------------------------------------------------------------------------------------------------------------------------------------------------------------------------------------------------------------------------------------------------------------------------------------------------|----------------------------------------------------------------------------------------------------------------------------------------------------------------------------------------------------------------------|
| Region 37                         | 990                                                                                           | 757                                                                                                                                                                                                                                       | 0,76                                                                                                                                                                                                                                                                                       | 76,5                                                                                                                                                                                                                                                                                       | 0,8                                                                                                                                                                                                                                                                                             | 202                                                                                                                                             | 202                                                                                                                                                                                                                                        | 1                                                                                                                                                                                                                                                                               | 100,0                                                                                                                                                                                                                                                                           | 1                                                                                                                                                                                                                                                                                                 | 1,8                                                                                                                                                                                                                  |
| Region 38                         | 904                                                                                           | 407                                                                                                                                                                                                                                       | 0,45                                                                                                                                                                                                                                                                                       | 45,0                                                                                                                                                                                                                                                                                       | 0,5                                                                                                                                                                                                                                                                                             | 253                                                                                                                                             | 101                                                                                                                                                                                                                                        | 0,39                                                                                                                                                                                                                                                                            | 39,9                                                                                                                                                                                                                                                                            | 0,3                                                                                                                                                                                                                                                                                               | 0,8                                                                                                                                                                                                                  |
| Region 39                         | 5166                                                                                          | 1859                                                                                                                                                                                                                                      | 0,35                                                                                                                                                                                                                                                                                       | 36,0                                                                                                                                                                                                                                                                                       | 0,3                                                                                                                                                                                                                                                                                             | 141                                                                                                                                             | 68                                                                                                                                                                                                                                         | 0,48                                                                                                                                                                                                                                                                            | 48,2                                                                                                                                                                                                                                                                            | 0,5                                                                                                                                                                                                                                                                                               | 0,8                                                                                                                                                                                                                  |
| Region 40                         | 1199                                                                                          | 492                                                                                                                                                                                                                                       | 0,5                                                                                                                                                                                                                                                                                        | 41,0                                                                                                                                                                                                                                                                                       | 0,5                                                                                                                                                                                                                                                                                             | 263                                                                                                                                             | 252                                                                                                                                                                                                                                        | 0,95                                                                                                                                                                                                                                                                            | 95,8                                                                                                                                                                                                                                                                            | 1                                                                                                                                                                                                                                                                                                 | 1,5                                                                                                                                                                                                                  |
| Region 41                         | 2179                                                                                          | 2130                                                                                                                                                                                                                                      | 0,97                                                                                                                                                                                                                                                                                       | 97,8                                                                                                                                                                                                                                                                                       | 1                                                                                                                                                                                                                                                                                               | 0                                                                                                                                               | 0                                                                                                                                                                                                                                          | 0                                                                                                                                                                                                                                                                               | 0,0                                                                                                                                                                                                                                                                             | 0                                                                                                                                                                                                                                                                                                 | 1                                                                                                                                                                                                                    |
| Region 42                         | 652                                                                                           | 345                                                                                                                                                                                                                                       | 0,52                                                                                                                                                                                                                                                                                       | 52,9                                                                                                                                                                                                                                                                                       | 0,5                                                                                                                                                                                                                                                                                             | 0                                                                                                                                               | 0                                                                                                                                                                                                                                          | 0                                                                                                                                                                                                                                                                               | 0,0                                                                                                                                                                                                                                                                             | 0                                                                                                                                                                                                                                                                                                 | 0,5                                                                                                                                                                                                                  |
| Region 43                         | 2379                                                                                          | 965                                                                                                                                                                                                                                       | 0,4                                                                                                                                                                                                                                                                                        | 40,6                                                                                                                                                                                                                                                                                       | 0,5                                                                                                                                                                                                                                                                                             | 1493                                                                                                                                            | 390                                                                                                                                                                                                                                        | 0,26                                                                                                                                                                                                                                                                            | 26,1                                                                                                                                                                                                                                                                            | 0,3                                                                                                                                                                                                                                                                                               | 0,8                                                                                                                                                                                                                  |
| Region 44                         | 1249                                                                                          | 563                                                                                                                                                                                                                                       | 0,45                                                                                                                                                                                                                                                                                       | 45,1                                                                                                                                                                                                                                                                                       | 0,5                                                                                                                                                                                                                                                                                             | 2561                                                                                                                                            | 2561                                                                                                                                                                                                                                       | 1                                                                                                                                                                                                                                                                               | 100,0                                                                                                                                                                                                                                                                           | 1                                                                                                                                                                                                                                                                                                 | 1,5                                                                                                                                                                                                                  |
| Region 45                         | 1481                                                                                          | 610                                                                                                                                                                                                                                       | 0,41                                                                                                                                                                                                                                                                                       | 41,2                                                                                                                                                                                                                                                                                       | 0,5                                                                                                                                                                                                                                                                                             | 251                                                                                                                                             | 251                                                                                                                                                                                                                                        | 1                                                                                                                                                                                                                                                                               | 100,0                                                                                                                                                                                                                                                                           | 1                                                                                                                                                                                                                                                                                                 | 1,5                                                                                                                                                                                                                  |
| Region 46                         | 2348                                                                                          | 64                                                                                                                                                                                                                                        | 0,02                                                                                                                                                                                                                                                                                       | 2,7                                                                                                                                                                                                                                                                                        | 0                                                                                                                                                                                                                                                                                               | 37                                                                                                                                              | 1                                                                                                                                                                                                                                          | 0,02                                                                                                                                                                                                                                                                            | 2,7                                                                                                                                                                                                                                                                             | 0                                                                                                                                                                                                                                                                                                 | 0                                                                                                                                                                                                                    |
| Region 47                         | 1755                                                                                          | 1000                                                                                                                                                                                                                                      | 0,5                                                                                                                                                                                                                                                                                        | 57,0                                                                                                                                                                                                                                                                                       | 0,5                                                                                                                                                                                                                                                                                             | 76                                                                                                                                              | 62                                                                                                                                                                                                                                         | 0,8                                                                                                                                                                                                                                                                             | 81,6                                                                                                                                                                                                                                                                            | 0,8                                                                                                                                                                                                                                                                                               | 1,3                                                                                                                                                                                                                  |

**Indicators of the regional rehabilitation systems development in Russia (2020)**

| Regions of the Russian Federation | Total number of professionals providing rehabilitation and (or) habilitation measures for PwD | Number of professionals providing rehabilitation and (or) habilitation measures for PwD, who have updated skills and (or) been trained under programs including application of techniques on rehabilitation and (or) habilitation for PwD | The share of professionals providing rehabilitation and (or) habilitation measures for PwD, who have updated skills and (or) been trained under programs including application of techniques on rehabilitation and (or) habilitation for PwD in the total number of those professionals, % | The share of professionals providing rehabilitation and (or) habilitation measures for PwD, who have updated skills and (or) been trained under programs including application of techniques on rehabilitation and (or) habilitation for PwD in the total number of those professionals, % | The share of professionals providing rehabilitation and (or) habilitation measures for PwD, who have updated skills and (or) been trained under programs including application of techniques on rehabilitation and (or) habilitation for PwD in the total number of those professionals, points | The total number of professionals in educational organizations, who teach professionals providing rehabilitation and (or) habilitation measures | Number of professionals in educational organizations, who have been trained under programs on rehabilitation and habilitation for PwD for the last 5 years and teach professionals providing rehabilitation and (or) habilitation measures | The share of professionals in educational organizations, who have been trained under programs on rehabilitation and for PwD for the last 5 years and teach professionals providing rehabilitation and (or) habilitation measures in the total numbers of those professionals, % | The share of professionals in educational organizations, who have been trained under programs on rehabilitation and for PwD for the last 5 years and teach professionals providing rehabilitation and (or) habilitation measures in the total numbers of those professionals, % | The share of professionals in educational organizations, who have been trained under programs on rehabilitation and habilitation for PwD for the last 5 years and teach professionals providing rehabilitation and (or) habilitation measures in the total numbers of those professionals, points | The staffing of organizations providing rehabilitation and (or) habilitation services with specialists of the appropriate profile based on the needs of PwD in rehabilitation and (or) habilitation services, points |
|-----------------------------------|-----------------------------------------------------------------------------------------------|-------------------------------------------------------------------------------------------------------------------------------------------------------------------------------------------------------------------------------------------|--------------------------------------------------------------------------------------------------------------------------------------------------------------------------------------------------------------------------------------------------------------------------------------------|--------------------------------------------------------------------------------------------------------------------------------------------------------------------------------------------------------------------------------------------------------------------------------------------|-------------------------------------------------------------------------------------------------------------------------------------------------------------------------------------------------------------------------------------------------------------------------------------------------|-------------------------------------------------------------------------------------------------------------------------------------------------|--------------------------------------------------------------------------------------------------------------------------------------------------------------------------------------------------------------------------------------------|---------------------------------------------------------------------------------------------------------------------------------------------------------------------------------------------------------------------------------------------------------------------------------|---------------------------------------------------------------------------------------------------------------------------------------------------------------------------------------------------------------------------------------------------------------------------------|---------------------------------------------------------------------------------------------------------------------------------------------------------------------------------------------------------------------------------------------------------------------------------------------------|----------------------------------------------------------------------------------------------------------------------------------------------------------------------------------------------------------------------|
| Region 48                         | 4267                                                                                          | 2433                                                                                                                                                                                                                                      | 0,57                                                                                                                                                                                                                                                                                       | 57,0                                                                                                                                                                                                                                                                                       | 0,5                                                                                                                                                                                                                                                                                             | 6                                                                                                                                               | 3                                                                                                                                                                                                                                          | 0,5                                                                                                                                                                                                                                                                             | 50,0                                                                                                                                                                                                                                                                            | 0,5                                                                                                                                                                                                                                                                                               | 1                                                                                                                                                                                                                    |
| Region 49                         | 170                                                                                           | 59                                                                                                                                                                                                                                        | 0,3                                                                                                                                                                                                                                                                                        | 34,7                                                                                                                                                                                                                                                                                       | 0,3                                                                                                                                                                                                                                                                                             | 4414                                                                                                                                            | 2990                                                                                                                                                                                                                                       | 0,67                                                                                                                                                                                                                                                                            | 67,7                                                                                                                                                                                                                                                                            | 0,7                                                                                                                                                                                                                                                                                               | 1                                                                                                                                                                                                                    |
| Region 50                         | 1820                                                                                          | 16                                                                                                                                                                                                                                        | 0                                                                                                                                                                                                                                                                                          | 0,9                                                                                                                                                                                                                                                                                        | 0                                                                                                                                                                                                                                                                                               | 16                                                                                                                                              | 13                                                                                                                                                                                                                                         | 0,81                                                                                                                                                                                                                                                                            | 81,3                                                                                                                                                                                                                                                                            | 0,8                                                                                                                                                                                                                                                                                               | 0,8                                                                                                                                                                                                                  |
| Region 51                         | 3221                                                                                          | 974                                                                                                                                                                                                                                       | 0,3                                                                                                                                                                                                                                                                                        | 30,2                                                                                                                                                                                                                                                                                       | 0,3                                                                                                                                                                                                                                                                                             | 1522                                                                                                                                            | 1100                                                                                                                                                                                                                                       | 0,72                                                                                                                                                                                                                                                                            | 72,3                                                                                                                                                                                                                                                                            | 0,8                                                                                                                                                                                                                                                                                               | 1,1                                                                                                                                                                                                                  |
| Region 52                         | 155                                                                                           | 70                                                                                                                                                                                                                                        | 0,5                                                                                                                                                                                                                                                                                        | 45,2                                                                                                                                                                                                                                                                                       | 0,5                                                                                                                                                                                                                                                                                             | 64                                                                                                                                              | 23                                                                                                                                                                                                                                         | 0,35                                                                                                                                                                                                                                                                            | 35,9                                                                                                                                                                                                                                                                            | 0,3                                                                                                                                                                                                                                                                                               | 0,8                                                                                                                                                                                                                  |
| Region 53                         | 1827                                                                                          | 199                                                                                                                                                                                                                                       | 0,1                                                                                                                                                                                                                                                                                        | 10,9                                                                                                                                                                                                                                                                                       | 0,2                                                                                                                                                                                                                                                                                             | 3                                                                                                                                               | 3                                                                                                                                                                                                                                          | 1                                                                                                                                                                                                                                                                               | 100,0                                                                                                                                                                                                                                                                           | 1                                                                                                                                                                                                                                                                                                 | 1,2                                                                                                                                                                                                                  |
| Region 54                         | 2011                                                                                          | 776                                                                                                                                                                                                                                       | 0,38                                                                                                                                                                                                                                                                                       | 38,6                                                                                                                                                                                                                                                                                       | 0,3                                                                                                                                                                                                                                                                                             | 11                                                                                                                                              | 11                                                                                                                                                                                                                                         | 1                                                                                                                                                                                                                                                                               | 100,0                                                                                                                                                                                                                                                                           | 1                                                                                                                                                                                                                                                                                                 | 1,3                                                                                                                                                                                                                  |
| Region 55                         | 3710                                                                                          | 1517                                                                                                                                                                                                                                      | 0,4                                                                                                                                                                                                                                                                                        | 40,9                                                                                                                                                                                                                                                                                       | 0,5                                                                                                                                                                                                                                                                                             | 5                                                                                                                                               | 5                                                                                                                                                                                                                                          | 1                                                                                                                                                                                                                                                                               | 100,0                                                                                                                                                                                                                                                                           | 1                                                                                                                                                                                                                                                                                                 | 1,5                                                                                                                                                                                                                  |
| Region 56                         | 8454                                                                                          | 7257                                                                                                                                                                                                                                      | 0,85                                                                                                                                                                                                                                                                                       | 85,8                                                                                                                                                                                                                                                                                       | 0,8                                                                                                                                                                                                                                                                                             | 1277                                                                                                                                            | 1277                                                                                                                                                                                                                                       | 1                                                                                                                                                                                                                                                                               | 100,0                                                                                                                                                                                                                                                                           | 1                                                                                                                                                                                                                                                                                                 | 1,8                                                                                                                                                                                                                  |
| Region 57                         | 2585                                                                                          | 492                                                                                                                                                                                                                                       | 0,19                                                                                                                                                                                                                                                                                       | 19,0                                                                                                                                                                                                                                                                                       | 0,2                                                                                                                                                                                                                                                                                             | 0                                                                                                                                               | 0                                                                                                                                                                                                                                          | 0                                                                                                                                                                                                                                                                               | 0,0                                                                                                                                                                                                                                                                             | 0                                                                                                                                                                                                                                                                                                 | 0,2                                                                                                                                                                                                                  |
| Region 58                         | 1967                                                                                          | 1780                                                                                                                                                                                                                                      | 0,9                                                                                                                                                                                                                                                                                        | 90,5                                                                                                                                                                                                                                                                                       | 1                                                                                                                                                                                                                                                                                               | 968                                                                                                                                             | 968                                                                                                                                                                                                                                        | 1                                                                                                                                                                                                                                                                               | 100,0                                                                                                                                                                                                                                                                           | 1                                                                                                                                                                                                                                                                                                 | 2                                                                                                                                                                                                                    |

**Indicators of the regional rehabilitation systems development in Russia (2020)**

| Regions of the Russian Federation | Total number of professionals providing rehabilitation and (or) habilitation measures for PwD | Number of professionals providing rehabilitation and (or) habilitation measures for PwD, who have updated skills and (or) been trained under programs including application of techniques on rehabilitation and (or) habilitation for PwD | The share of professionals providing rehabilitation and (or) habilitation measures for PwD, who have updated skills and (or) been trained under programs including application of techniques on rehabilitation and (or) habilitation for PwD in the total number of those professionals, % | The share of professionals providing rehabilitation and (or) habilitation measures for PwD, who have updated skills and (or) been trained under programs including application of techniques on rehabilitation and (or) habilitation for PwD in the total number of those professionals, % | The share of professionals providing rehabilitation and (or) habilitation measures for PwD, who have updated skills and (or) been trained under programs including application of techniques on rehabilitation and (or) habilitation for PwD in the total number of those professionals, points | The total number of professionals in educational organizations, who teach professionals providing rehabilitation and (or) habilitation measures | Number of professionals in educational organizations, who have been trained under programs on rehabilitation and habilitation for PwD for the last 5 years and teach professionals providing rehabilitation and (or) habilitation measures | The share of professionals in educational organizations, who have been trained under programs on rehabilitation and for PwD for the last 5 years and teach professionals providing rehabilitation and (or) habilitation measures in the total numbers of those professionals, % | The share of professionals in educational organizations, who have been trained under programs on rehabilitation and for PwD for the last 5 years and teach professionals providing rehabilitation and (or) habilitation measures in the total numbers of those professionals, % | The share of professionals in educational organizations, who have been trained under programs on rehabilitation and habilitation for PwD for the last 5 years and teach professionals providing rehabilitation and (or) habilitation measures in the total numbers of those professionals, points | The staffing of organizations providing rehabilitation and (or) habilitation services with specialists of the appropriate profile based on the needs of PwD in rehabilitation and (or) habilitation services, points |
|-----------------------------------|-----------------------------------------------------------------------------------------------|-------------------------------------------------------------------------------------------------------------------------------------------------------------------------------------------------------------------------------------------|--------------------------------------------------------------------------------------------------------------------------------------------------------------------------------------------------------------------------------------------------------------------------------------------|--------------------------------------------------------------------------------------------------------------------------------------------------------------------------------------------------------------------------------------------------------------------------------------------|-------------------------------------------------------------------------------------------------------------------------------------------------------------------------------------------------------------------------------------------------------------------------------------------------|-------------------------------------------------------------------------------------------------------------------------------------------------|--------------------------------------------------------------------------------------------------------------------------------------------------------------------------------------------------------------------------------------------|---------------------------------------------------------------------------------------------------------------------------------------------------------------------------------------------------------------------------------------------------------------------------------|---------------------------------------------------------------------------------------------------------------------------------------------------------------------------------------------------------------------------------------------------------------------------------|---------------------------------------------------------------------------------------------------------------------------------------------------------------------------------------------------------------------------------------------------------------------------------------------------|----------------------------------------------------------------------------------------------------------------------------------------------------------------------------------------------------------------------|
| Region 59                         | 1332                                                                                          | 856                                                                                                                                                                                                                                       | 0,64                                                                                                                                                                                                                                                                                       | 64,3                                                                                                                                                                                                                                                                                       | 0,7                                                                                                                                                                                                                                                                                             | 456                                                                                                                                             | 441                                                                                                                                                                                                                                        | 0,96                                                                                                                                                                                                                                                                            | 96,7                                                                                                                                                                                                                                                                            | 1                                                                                                                                                                                                                                                                                                 | 1,7                                                                                                                                                                                                                  |
| Region 60                         | 12618                                                                                         | 7710                                                                                                                                                                                                                                      | 0,61                                                                                                                                                                                                                                                                                       | 61,1                                                                                                                                                                                                                                                                                       | 0,7                                                                                                                                                                                                                                                                                             | 5256                                                                                                                                            | 4603                                                                                                                                                                                                                                       | 0,87                                                                                                                                                                                                                                                                            | 87,6                                                                                                                                                                                                                                                                            | 0,8                                                                                                                                                                                                                                                                                               | 1,5                                                                                                                                                                                                                  |
| Region 61                         | 6420                                                                                          | 2889                                                                                                                                                                                                                                      | 0,45                                                                                                                                                                                                                                                                                       | 45,0                                                                                                                                                                                                                                                                                       | 0,5                                                                                                                                                                                                                                                                                             | 36                                                                                                                                              | 9                                                                                                                                                                                                                                          | 0,25                                                                                                                                                                                                                                                                            | 25,0                                                                                                                                                                                                                                                                            | 0,3                                                                                                                                                                                                                                                                                               | 0,8                                                                                                                                                                                                                  |
| Region 62                         | 1069                                                                                          | 599                                                                                                                                                                                                                                       | 0,56                                                                                                                                                                                                                                                                                       | 56,0                                                                                                                                                                                                                                                                                       | 0,5                                                                                                                                                                                                                                                                                             | 4                                                                                                                                               | 4                                                                                                                                                                                                                                          | 1                                                                                                                                                                                                                                                                               | 100,0                                                                                                                                                                                                                                                                           | 1                                                                                                                                                                                                                                                                                                 | 1,5                                                                                                                                                                                                                  |
| Region 63                         | 828                                                                                           | 582                                                                                                                                                                                                                                       | 0,7                                                                                                                                                                                                                                                                                        | 70,3                                                                                                                                                                                                                                                                                       | 0,8                                                                                                                                                                                                                                                                                             | 64                                                                                                                                              | 52                                                                                                                                                                                                                                         | 0,81                                                                                                                                                                                                                                                                            | 81,3                                                                                                                                                                                                                                                                            | 0,8                                                                                                                                                                                                                                                                                               | 1,6                                                                                                                                                                                                                  |
| Region 64                         | 3076                                                                                          | 1549                                                                                                                                                                                                                                      | 0,5                                                                                                                                                                                                                                                                                        | 50,4                                                                                                                                                                                                                                                                                       | 0,5                                                                                                                                                                                                                                                                                             | 7611                                                                                                                                            | 4263                                                                                                                                                                                                                                       | 0,56                                                                                                                                                                                                                                                                            | 56,0                                                                                                                                                                                                                                                                            | 0,5                                                                                                                                                                                                                                                                                               | 1                                                                                                                                                                                                                    |
| Region 65                         | 1417                                                                                          | 1018                                                                                                                                                                                                                                      | 0,71                                                                                                                                                                                                                                                                                       | 71,8                                                                                                                                                                                                                                                                                       | 0,8                                                                                                                                                                                                                                                                                             | 900                                                                                                                                             | 900                                                                                                                                                                                                                                        | 1                                                                                                                                                                                                                                                                               | 100,0                                                                                                                                                                                                                                                                           | 1                                                                                                                                                                                                                                                                                                 | 1,8                                                                                                                                                                                                                  |
| Region 66                         | 5786                                                                                          | 2441                                                                                                                                                                                                                                      | 0,42                                                                                                                                                                                                                                                                                       | 42,2                                                                                                                                                                                                                                                                                       | 0,5                                                                                                                                                                                                                                                                                             | 126                                                                                                                                             | 89                                                                                                                                                                                                                                         | 0,7                                                                                                                                                                                                                                                                             | 70,6                                                                                                                                                                                                                                                                            | 0,8                                                                                                                                                                                                                                                                                               | 1,3                                                                                                                                                                                                                  |
| Region 67                         | 116261                                                                                        | 69756                                                                                                                                                                                                                                     | 0,5                                                                                                                                                                                                                                                                                        | 60,0                                                                                                                                                                                                                                                                                       | 0,5                                                                                                                                                                                                                                                                                             | 0                                                                                                                                               | 0                                                                                                                                                                                                                                          | 0                                                                                                                                                                                                                                                                               | 0,0                                                                                                                                                                                                                                                                             | 0                                                                                                                                                                                                                                                                                                 | 0,5                                                                                                                                                                                                                  |
| Region 68                         | 1708                                                                                          | 451                                                                                                                                                                                                                                       | 0,26                                                                                                                                                                                                                                                                                       | 26,4                                                                                                                                                                                                                                                                                       | 0,3                                                                                                                                                                                                                                                                                             | 1288                                                                                                                                            | 1031                                                                                                                                                                                                                                       | 0,8                                                                                                                                                                                                                                                                             | 80,1                                                                                                                                                                                                                                                                            | 0,8                                                                                                                                                                                                                                                                                               | 1,1                                                                                                                                                                                                                  |
| Region 69                         | 3357                                                                                          | 493                                                                                                                                                                                                                                       | 0,14                                                                                                                                                                                                                                                                                       | 14,7                                                                                                                                                                                                                                                                                       | 0,2                                                                                                                                                                                                                                                                                             | 22                                                                                                                                              | 5                                                                                                                                                                                                                                          | 0,22                                                                                                                                                                                                                                                                            | 22,7                                                                                                                                                                                                                                                                            | 0,3                                                                                                                                                                                                                                                                                               | 0,5                                                                                                                                                                                                                  |

**Indicators of the regional rehabilitation systems development in Russia (2020)**

| Regions of the Russian Federation | Total number of professionals providing rehabilitation and (or) habilitation measures for PwD | Number of professionals providing rehabilitation and (or) habilitation measures for PwD, who have updated skills and (or) been trained under programs including application of techniques on rehabilitation and (or) habilitation for PwD | The share of professionals providing rehabilitation and (or) habilitation measures for PwD, who have updated skills and (or) been trained under programs including application of techniques on rehabilitation and (or) habilitation for PwD in the total number of those professionals, % | The share of professionals providing rehabilitation and (or) habilitation measures for PwD, who have updated skills and (or) been trained under programs including application of techniques on rehabilitation and (or) habilitation for PwD in the total number of those professionals, % | The share of professionals providing rehabilitation and (or) habilitation measures for PwD, who have updated skills and (or) been trained under programs including application of techniques on rehabilitation and (or) habilitation for PwD in the total number of those professionals, points | The total number of professionals in educational organizations, who teach professionals providing rehabilitation and (or) habilitation measures | Number of professionals in educational organizations, who have been trained under programs on rehabilitation and habilitation for PwD for the last 5 years and teach professionals providing rehabilitation and (or) habilitation measures | The share of professionals in educational organizations, who have been trained under programs on rehabilitation and for PwD for the last 5 years and teach professionals providing rehabilitation and (or) habilitation measures in the total numbers of those professionals, % | The share of professionals in educational organizations, who have been trained under programs on rehabilitation and for PwD for the last 5 years and teach professionals providing rehabilitation and (or) habilitation measures in the total numbers of those professionals, % | The share of professionals in educational organizations, who have been trained under programs on rehabilitation and habilitation for PwD for the last 5 years and teach professionals providing rehabilitation and (or) habilitation measures in the total numbers of those professionals, points | The staffing of organizations providing rehabilitation and (or) habilitation services with specialists of the appropriate profile based on the needs of PwD in rehabilitation and (or) habilitation services, points |
|-----------------------------------|-----------------------------------------------------------------------------------------------|-------------------------------------------------------------------------------------------------------------------------------------------------------------------------------------------------------------------------------------------|--------------------------------------------------------------------------------------------------------------------------------------------------------------------------------------------------------------------------------------------------------------------------------------------|--------------------------------------------------------------------------------------------------------------------------------------------------------------------------------------------------------------------------------------------------------------------------------------------|-------------------------------------------------------------------------------------------------------------------------------------------------------------------------------------------------------------------------------------------------------------------------------------------------|-------------------------------------------------------------------------------------------------------------------------------------------------|--------------------------------------------------------------------------------------------------------------------------------------------------------------------------------------------------------------------------------------------|---------------------------------------------------------------------------------------------------------------------------------------------------------------------------------------------------------------------------------------------------------------------------------|---------------------------------------------------------------------------------------------------------------------------------------------------------------------------------------------------------------------------------------------------------------------------------|---------------------------------------------------------------------------------------------------------------------------------------------------------------------------------------------------------------------------------------------------------------------------------------------------|----------------------------------------------------------------------------------------------------------------------------------------------------------------------------------------------------------------------|
| Region 70                         | 1246                                                                                          | 1155                                                                                                                                                                                                                                      | 0,92                                                                                                                                                                                                                                                                                       | 92,7                                                                                                                                                                                                                                                                                       | 1                                                                                                                                                                                                                                                                                               | 26                                                                                                                                              | 26                                                                                                                                                                                                                                         | 1                                                                                                                                                                                                                                                                               | 100,0                                                                                                                                                                                                                                                                           | 1                                                                                                                                                                                                                                                                                                 | 2                                                                                                                                                                                                                    |
| Region 71                         | 20                                                                                            | 20                                                                                                                                                                                                                                        | 1                                                                                                                                                                                                                                                                                          | 100,0                                                                                                                                                                                                                                                                                      | 1                                                                                                                                                                                                                                                                                               | 40                                                                                                                                              | 40                                                                                                                                                                                                                                         | 1                                                                                                                                                                                                                                                                               | 100,0                                                                                                                                                                                                                                                                           | 1                                                                                                                                                                                                                                                                                                 | 2                                                                                                                                                                                                                    |
| Region 72                         | 5637                                                                                          | 978                                                                                                                                                                                                                                       | 0,17                                                                                                                                                                                                                                                                                       | 17,4                                                                                                                                                                                                                                                                                       | 0,2                                                                                                                                                                                                                                                                                             | 1407                                                                                                                                            | 1032                                                                                                                                                                                                                                       | 0,73                                                                                                                                                                                                                                                                            | 73,4                                                                                                                                                                                                                                                                            | 0,8                                                                                                                                                                                                                                                                                               | 1                                                                                                                                                                                                                    |
| Region 73                         | 630                                                                                           | 174                                                                                                                                                                                                                                       | 0,3                                                                                                                                                                                                                                                                                        | 27,6                                                                                                                                                                                                                                                                                       | 0,3                                                                                                                                                                                                                                                                                             | 41                                                                                                                                              | 32                                                                                                                                                                                                                                         | 78                                                                                                                                                                                                                                                                              | 78,1                                                                                                                                                                                                                                                                            | 0,8                                                                                                                                                                                                                                                                                               | 1,1                                                                                                                                                                                                                  |
| Region 74                         | 6529                                                                                          | 515                                                                                                                                                                                                                                       | 0,07                                                                                                                                                                                                                                                                                       | 7,9                                                                                                                                                                                                                                                                                        | 0,1                                                                                                                                                                                                                                                                                             | 100                                                                                                                                             | 100                                                                                                                                                                                                                                        | 1                                                                                                                                                                                                                                                                               | 100,0                                                                                                                                                                                                                                                                           | 1                                                                                                                                                                                                                                                                                                 | 1,1                                                                                                                                                                                                                  |
| Region 75                         | 2169                                                                                          | 1379                                                                                                                                                                                                                                      | 0,63                                                                                                                                                                                                                                                                                       | 63,6                                                                                                                                                                                                                                                                                       | 0,7                                                                                                                                                                                                                                                                                             | 198                                                                                                                                             | 0                                                                                                                                                                                                                                          | 0                                                                                                                                                                                                                                                                               | 0,0                                                                                                                                                                                                                                                                             | 0                                                                                                                                                                                                                                                                                                 | 0,7                                                                                                                                                                                                                  |
| Region 76                         | 10422                                                                                         | 3396                                                                                                                                                                                                                                      | 0,32                                                                                                                                                                                                                                                                                       | 32,6                                                                                                                                                                                                                                                                                       | 0,3                                                                                                                                                                                                                                                                                             | 11                                                                                                                                              | 11                                                                                                                                                                                                                                         | 1                                                                                                                                                                                                                                                                               | 100,0                                                                                                                                                                                                                                                                           | 1                                                                                                                                                                                                                                                                                                 | 1,3                                                                                                                                                                                                                  |
| Region 77                         | 8                                                                                             | 4                                                                                                                                                                                                                                         | 0,5                                                                                                                                                                                                                                                                                        | 50,0                                                                                                                                                                                                                                                                                       | 0,5                                                                                                                                                                                                                                                                                             | 1                                                                                                                                               | 1                                                                                                                                                                                                                                          | 1                                                                                                                                                                                                                                                                               | 100,0                                                                                                                                                                                                                                                                           | 1                                                                                                                                                                                                                                                                                                 | 1,5                                                                                                                                                                                                                  |
| Region 78                         | 645                                                                                           | 214                                                                                                                                                                                                                                       | 0,33                                                                                                                                                                                                                                                                                       | 33,2                                                                                                                                                                                                                                                                                       | 0,3                                                                                                                                                                                                                                                                                             | 132                                                                                                                                             | 128                                                                                                                                                                                                                                        | 0,97                                                                                                                                                                                                                                                                            | 97,0                                                                                                                                                                                                                                                                            | 1                                                                                                                                                                                                                                                                                                 | 1,3                                                                                                                                                                                                                  |
| Region 79                         | 1109                                                                                          | 810                                                                                                                                                                                                                                       | 0,73                                                                                                                                                                                                                                                                                       | 73,0                                                                                                                                                                                                                                                                                       | 0,8                                                                                                                                                                                                                                                                                             | 30715                                                                                                                                           | 3660                                                                                                                                                                                                                                       | 0,11                                                                                                                                                                                                                                                                            | 11,9                                                                                                                                                                                                                                                                            | 0,2                                                                                                                                                                                                                                                                                               | 1                                                                                                                                                                                                                    |
| Region 80                         | 4861                                                                                          | 1074                                                                                                                                                                                                                                      | 0,3                                                                                                                                                                                                                                                                                        | 22,1                                                                                                                                                                                                                                                                                       | 0,3                                                                                                                                                                                                                                                                                             | 27                                                                                                                                              | 0                                                                                                                                                                                                                                          | 0                                                                                                                                                                                                                                                                               | 0,0                                                                                                                                                                                                                                                                             | 0                                                                                                                                                                                                                                                                                                 | 0,3                                                                                                                                                                                                                  |

**Indicators of the regional rehabilitation systems development in Russia (2020)**

| Regions of the Russian Federation | Total number of professionals providing rehabilitation and (or) habilitation measures for PwD | Number of professionals providing rehabilitation and (or) habilitation measures for PwD, who have updated skills and (or) been trained under programs including application of techniques on rehabilitation and (or) habilitation for PwD | The share of professionals providing rehabilitation and (or) habilitation measures for PwD, who have updated skills and (or) been trained under programs including application of techniques on rehabilitation and (or) habilitation for PwD in the total number of those professionals, % | The share of professionals providing rehabilitation and (or) habilitation measures for PwD, who have updated skills and (or) been trained under programs including application of techniques on rehabilitation and (or) habilitation for PwD in the total number of those professionals, % | The share of professionals providing rehabilitation and (or) habilitation measures for PwD, who have updated skills and (or) been trained under programs including application of techniques on rehabilitation and (or) habilitation for PwD in the total number of those professionals, points | The total number of professionals in educational organizations, who teach professionals providing rehabilitation and (or) habilitation measures | Number of professionals in educational organizations, who have been trained under programs on rehabilitation and habilitation for PwD for the last 5 years and teach professionals providing rehabilitation and (or) habilitation measures | The share of professionals in educational organizations, who have been trained under programs on rehabilitation and for PwD for the last 5 years and teach professionals providing rehabilitation and (or) habilitation measures in the total numbers of those professionals, % | The share of professionals in educational organizations, who have been trained under programs on rehabilitation and for PwD for the last 5 years and teach professionals providing rehabilitation and (or) habilitation measures in the total numbers of those professionals, % | The share of professionals in educational organizations, who have been trained under programs on rehabilitation and habilitation for PwD for the last 5 years and teach professionals providing rehabilitation and (or) habilitation measures in the total numbers of those professionals, points | The staffing of organizations providing rehabilitation and (or) habilitation services with specialists of the appropriate profile based on the needs of PwD in rehabilitation and (or) habilitation services, points |
|-----------------------------------|-----------------------------------------------------------------------------------------------|-------------------------------------------------------------------------------------------------------------------------------------------------------------------------------------------------------------------------------------------|--------------------------------------------------------------------------------------------------------------------------------------------------------------------------------------------------------------------------------------------------------------------------------------------|--------------------------------------------------------------------------------------------------------------------------------------------------------------------------------------------------------------------------------------------------------------------------------------------|-------------------------------------------------------------------------------------------------------------------------------------------------------------------------------------------------------------------------------------------------------------------------------------------------|-------------------------------------------------------------------------------------------------------------------------------------------------|--------------------------------------------------------------------------------------------------------------------------------------------------------------------------------------------------------------------------------------------|---------------------------------------------------------------------------------------------------------------------------------------------------------------------------------------------------------------------------------------------------------------------------------|---------------------------------------------------------------------------------------------------------------------------------------------------------------------------------------------------------------------------------------------------------------------------------|---------------------------------------------------------------------------------------------------------------------------------------------------------------------------------------------------------------------------------------------------------------------------------------------------|----------------------------------------------------------------------------------------------------------------------------------------------------------------------------------------------------------------------|
| Region 81                         | 3448                                                                                          | 3139                                                                                                                                                                                                                                      | 0,9                                                                                                                                                                                                                                                                                        | 91,0                                                                                                                                                                                                                                                                                       | 1                                                                                                                                                                                                                                                                                               | 2797                                                                                                                                            | 2517                                                                                                                                                                                                                                       | 0,89                                                                                                                                                                                                                                                                            | 90,0                                                                                                                                                                                                                                                                            | 0,8                                                                                                                                                                                                                                                                                               | 1,8                                                                                                                                                                                                                  |
| Region 82                         | 567                                                                                           | 0                                                                                                                                                                                                                                         | 0                                                                                                                                                                                                                                                                                          | 0,0                                                                                                                                                                                                                                                                                        | 0                                                                                                                                                                                                                                                                                               | 78                                                                                                                                              | 0                                                                                                                                                                                                                                          | 0                                                                                                                                                                                                                                                                               | 0,0                                                                                                                                                                                                                                                                             | 0                                                                                                                                                                                                                                                                                                 | 0                                                                                                                                                                                                                    |
| Region 83                         | 0                                                                                             | 0                                                                                                                                                                                                                                         | 0                                                                                                                                                                                                                                                                                          | 0,0                                                                                                                                                                                                                                                                                        | 0                                                                                                                                                                                                                                                                                               | 0                                                                                                                                               | 0                                                                                                                                                                                                                                          | 0                                                                                                                                                                                                                                                                               | 0,0                                                                                                                                                                                                                                                                             | 0                                                                                                                                                                                                                                                                                                 | 0                                                                                                                                                                                                                    |

**Indicators of the regional rehabilitation systems development in Russia (2020)**

| Regions of the Russian Federation | Availability of an interagency information system (presence - 1 point, absence - 0 point) | Total number of PwD in the region | Total number of PwD in the region | Number of PwD, whose data are stored in the interagency information system | The share of of PwD, whose data are stored in the interagency information system, % | The share of of PwD, whose data are stored in the interagency information system, points | Number of organizations providing rehabilitation and (or) habilitation measures in the region | Number of organizations providing rehabilitation and (or) habilitation measures in the regions and connected to the interagency information system | The share of organizations providing rehabilitation and (or) habilitation measures in the regions and connected to the interagency information system in the total number of those organizations, % | The share of organizations providing rehabilitation and (or) habilitation measures in the regions and connected to the interagency information system in the total number of those organizations, points | The number of PwD who received measures that were written in the individual rehabilitation/habilitation programs and determined by the regional agencies in the assessment period | The number of PwD who received the individual rehabilitation/habilitation programs in the bureaus of medical and social expertise in the assessment period | The share of PwD who received measures that were written in the individual rehabilitation/habilitation programs and determined by the regional agencies in the total number of PwD who received the individual rehabilitation/habilitation programs in the bureaus of medical and social expertise in the assessment period, % | The share of PwD who received measures that were written in the individual rehabilitation/habilitation programs and determined by the regional agencies in the total number of PwD who received the individual rehabilitation/habilitation programs in the bureaus of medical and social expertise in the assessment period, points | The formation of the information base of the regional system, taking into account information about the needs of PwD in rehabilitation and (or) habilitation services, points |
|-----------------------------------|-------------------------------------------------------------------------------------------|-----------------------------------|-----------------------------------|----------------------------------------------------------------------------|-------------------------------------------------------------------------------------|------------------------------------------------------------------------------------------|-----------------------------------------------------------------------------------------------|----------------------------------------------------------------------------------------------------------------------------------------------------|-----------------------------------------------------------------------------------------------------------------------------------------------------------------------------------------------------|----------------------------------------------------------------------------------------------------------------------------------------------------------------------------------------------------------|-----------------------------------------------------------------------------------------------------------------------------------------------------------------------------------|------------------------------------------------------------------------------------------------------------------------------------------------------------|--------------------------------------------------------------------------------------------------------------------------------------------------------------------------------------------------------------------------------------------------------------------------------------------------------------------------------|-------------------------------------------------------------------------------------------------------------------------------------------------------------------------------------------------------------------------------------------------------------------------------------------------------------------------------------|-------------------------------------------------------------------------------------------------------------------------------------------------------------------------------|
| Region 1                          | 0                                                                                         | 179084                            | 179084                            | 0                                                                          | 0,0                                                                                 | 0                                                                                        | 260                                                                                           | 18                                                                                                                                                 | 6,9                                                                                                                                                                                                 | 0,1                                                                                                                                                                                                      | 93738                                                                                                                                                                             | 33426                                                                                                                                                      | 280,4                                                                                                                                                                                                                                                                                                                          | 1                                                                                                                                                                                                                                                                                                                                   | 1,1                                                                                                                                                                           |
| Region 2                          | 0                                                                                         | 66851                             | 65352                             | 0                                                                          | 0,0                                                                                 | 0                                                                                        | 55                                                                                            | 0                                                                                                                                                  | 0,0                                                                                                                                                                                                 | 0                                                                                                                                                                                                        | 19121                                                                                                                                                                             | 31578                                                                                                                                                      | 60,6                                                                                                                                                                                                                                                                                                                           | 0,6                                                                                                                                                                                                                                                                                                                                 | 0,6                                                                                                                                                                           |
| Region 3                          | 1                                                                                         | 88162                             | 82000                             | 81937                                                                      | 99,9                                                                                | 0,9                                                                                      | 53                                                                                            | 51                                                                                                                                                 | 96,2                                                                                                                                                                                                | 0,9                                                                                                                                                                                                      | 6115                                                                                                                                                                              | 19124                                                                                                                                                      | 32,0                                                                                                                                                                                                                                                                                                                           | 0,3                                                                                                                                                                                                                                                                                                                                 | 3,1                                                                                                                                                                           |
| Region 4                          | 0                                                                                         | 47182                             | 48706                             | 0                                                                          | 0,0                                                                                 | 0                                                                                        | 35                                                                                            | 0                                                                                                                                                  | 0,0                                                                                                                                                                                                 | 0                                                                                                                                                                                                        | 29433                                                                                                                                                                             | 36791                                                                                                                                                      | 80,0                                                                                                                                                                                                                                                                                                                           | 0,8                                                                                                                                                                                                                                                                                                                                 | 0,8                                                                                                                                                                           |
| Region 5                          | 1                                                                                         | 198249                            | 193276                            | 129218                                                                     | 66,9                                                                                | 0,6                                                                                      | 119                                                                                           | 47                                                                                                                                                 | 39,5                                                                                                                                                                                                | 0,3                                                                                                                                                                                                      | 27503                                                                                                                                                                             | 29845                                                                                                                                                      | 92,2                                                                                                                                                                                                                                                                                                                           | 0,9                                                                                                                                                                                                                                                                                                                                 | 2,8                                                                                                                                                                           |
| Region 6                          | 1                                                                                         | 108557                            | 107431                            | 3508                                                                       | 3,3                                                                                 | 0                                                                                        | 122                                                                                           | 40                                                                                                                                                 | 32,8                                                                                                                                                                                                | 0,3                                                                                                                                                                                                      | 24819                                                                                                                                                                             | 24404                                                                                                                                                      | 101,7                                                                                                                                                                                                                                                                                                                          | 1                                                                                                                                                                                                                                                                                                                                   | 2,3                                                                                                                                                                           |
| Region 7                          | 1                                                                                         | 124431                            | 122857                            | 122857                                                                     | 100,0                                                                               | 1                                                                                        | 96                                                                                            | 51                                                                                                                                                 | 53,1                                                                                                                                                                                                | 0,5                                                                                                                                                                                                      | 14574                                                                                                                                                                             | 22658                                                                                                                                                      | 64,3                                                                                                                                                                                                                                                                                                                           | 0,6                                                                                                                                                                                                                                                                                                                                 | 3,1                                                                                                                                                                           |
| Region 8                          | 1                                                                                         | 176486                            | 173529                            | 40330                                                                      | 23,2                                                                                | 0,2                                                                                      | 169                                                                                           | 104                                                                                                                                                | 61,5                                                                                                                                                                                                | 0,6                                                                                                                                                                                                      | 38281                                                                                                                                                                             | 33596                                                                                                                                                      | 113,9                                                                                                                                                                                                                                                                                                                          | 1                                                                                                                                                                                                                                                                                                                                   | 2,8                                                                                                                                                                           |
| Region 9                          | 1                                                                                         | 96255                             | 94992                             | 43316                                                                      | 45,6                                                                                | 0,4                                                                                      | 283                                                                                           | 193                                                                                                                                                | 68,2                                                                                                                                                                                                | 0,6                                                                                                                                                                                                      | 23929                                                                                                                                                                             | 21122                                                                                                                                                      | 113,3                                                                                                                                                                                                                                                                                                                          | 1                                                                                                                                                                                                                                                                                                                                   | 3                                                                                                                                                                             |
| Region 10                         | 1                                                                                         | 12998                             | 13378                             | 13378                                                                      | 100,0                                                                               | 1                                                                                        | 326                                                                                           | 135                                                                                                                                                | 41,4                                                                                                                                                                                                | 0,4                                                                                                                                                                                                      | 1517                                                                                                                                                                              | 3274                                                                                                                                                       | 46,3                                                                                                                                                                                                                                                                                                                           | 0,4                                                                                                                                                                                                                                                                                                                                 | 2,8                                                                                                                                                                           |
| Region 11                         | 1                                                                                         | 81260                             | 80583                             | 70818                                                                      | 87,9                                                                                | 0,8                                                                                      | 9                                                                                             | 6                                                                                                                                                  | 66,7                                                                                                                                                                                                | 0,6                                                                                                                                                                                                      | 9853                                                                                                                                                                              | 4198                                                                                                                                                       | 234,7                                                                                                                                                                                                                                                                                                                          | 1                                                                                                                                                                                                                                                                                                                                   | 3,4                                                                                                                                                                           |
| Region 12                         | 1                                                                                         | 79118                             | 74973                             | 0                                                                          | 0,0                                                                                 | 0                                                                                        | 98                                                                                            | 0                                                                                                                                                  | 0,0                                                                                                                                                                                                 | 0                                                                                                                                                                                                        | 10029                                                                                                                                                                             | 10029                                                                                                                                                      | 100,0                                                                                                                                                                                                                                                                                                                          | 1                                                                                                                                                                                                                                                                                                                                   | 2                                                                                                                                                                             |
| Region 13                         | 0                                                                                         | 217123                            | 217123                            | 0                                                                          | 0,0                                                                                 | 0                                                                                        | 147                                                                                           | 0                                                                                                                                                  | 0,0                                                                                                                                                                                                 | 0                                                                                                                                                                                                        | 25543                                                                                                                                                                             | 35422                                                                                                                                                      | 72,1                                                                                                                                                                                                                                                                                                                           | 0,7                                                                                                                                                                                                                                                                                                                                 | 0,7                                                                                                                                                                           |
| Region 14                         | 0                                                                                         | 61240                             | 60110                             | 0                                                                          | 0,0                                                                                 | 0                                                                                        | 286                                                                                           | 0                                                                                                                                                  | 0,0                                                                                                                                                                                                 | 0                                                                                                                                                                                                        | 13188                                                                                                                                                                             | 14557                                                                                                                                                      | 90,6                                                                                                                                                                                                                                                                                                                           | 0,9                                                                                                                                                                                                                                                                                                                                 | 0,9                                                                                                                                                                           |
| Region 15                         | 1                                                                                         | 70656                             | 70656                             | 70656                                                                      | 100,0                                                                               | 1                                                                                        | 294                                                                                           | 53                                                                                                                                                 | 18,0                                                                                                                                                                                                | 0,1                                                                                                                                                                                                      | 9299                                                                                                                                                                              | 13497                                                                                                                                                      | 68,9                                                                                                                                                                                                                                                                                                                           | 0,6                                                                                                                                                                                                                                                                                                                                 | 2,7                                                                                                                                                                           |
| Region 16                         | 1                                                                                         | 79275                             | 75495                             | 63408                                                                      | 84,0                                                                                | 0,8                                                                                      | 115                                                                                           | 60                                                                                                                                                 | 52,2                                                                                                                                                                                                | 0,5                                                                                                                                                                                                      | 12856                                                                                                                                                                             | 21655                                                                                                                                                      | 59,4                                                                                                                                                                                                                                                                                                                           | 0,5                                                                                                                                                                                                                                                                                                                                 | 2,8                                                                                                                                                                           |
| Region 17                         | 1                                                                                         | 14503                             | 13742                             | 6964                                                                       | 50,7                                                                                | 0,5                                                                                      | 63                                                                                            | 17                                                                                                                                                 | 27,0                                                                                                                                                                                                | 0,2                                                                                                                                                                                                      | 1663                                                                                                                                                                              | 3310                                                                                                                                                       | 50,2                                                                                                                                                                                                                                                                                                                           | 0,5                                                                                                                                                                                                                                                                                                                                 | 2,2                                                                                                                                                                           |
| Region 18                         | 0                                                                                         | 225348                            | 224421                            | 0                                                                          | 0,0                                                                                 | 0                                                                                        | 98                                                                                            | 0                                                                                                                                                  | 0,0                                                                                                                                                                                                 | 0                                                                                                                                                                                                        | 31769                                                                                                                                                                             | 4272                                                                                                                                                       | 743,7                                                                                                                                                                                                                                                                                                                          | 1                                                                                                                                                                                                                                                                                                                                   | 1                                                                                                                                                                             |
| Region 19                         | 1                                                                                         | 122117                            | 122117                            | 104895                                                                     | 85,9                                                                                | 0,8                                                                                      | 639                                                                                           | 77                                                                                                                                                 | 12,1                                                                                                                                                                                                | 0,1                                                                                                                                                                                                      | 26048                                                                                                                                                                             | 26048                                                                                                                                                      | 100,0                                                                                                                                                                                                                                                                                                                          | 1                                                                                                                                                                                                                                                                                                                                   | 2,9                                                                                                                                                                           |
| Region 20                         | 0                                                                                         | 58936                             | 56253                             | 0                                                                          | 0,0                                                                                 | 0                                                                                        | 129                                                                                           | 0                                                                                                                                                  | 0,0                                                                                                                                                                                                 | 0                                                                                                                                                                                                        | 5551                                                                                                                                                                              | 7388                                                                                                                                                       | 75,1                                                                                                                                                                                                                                                                                                                           | 0,7                                                                                                                                                                                                                                                                                                                                 | 0,7                                                                                                                                                                           |
| Region 21                         | 0                                                                                         | 193307                            | 193307                            | 0                                                                          | 0,0                                                                                 | 0                                                                                        | 274                                                                                           | 0                                                                                                                                                  | 0,0                                                                                                                                                                                                 | 0                                                                                                                                                                                                        | 29014                                                                                                                                                                             | 41046                                                                                                                                                      | 70,7                                                                                                                                                                                                                                                                                                                           | 0,7                                                                                                                                                                                                                                                                                                                                 | 0,7                                                                                                                                                                           |
| Region 22                         | 1                                                                                         | 74696                             | 72725                             | 36362                                                                      | 50,0                                                                                | 0,5                                                                                      | 79                                                                                            | 77                                                                                                                                                 | 97,5                                                                                                                                                                                                | 0,9                                                                                                                                                                                                      | 0                                                                                                                                                                                 | 0                                                                                                                                                          |                                                                                                                                                                                                                                                                                                                                |                                                                                                                                                                                                                                                                                                                                     | 2,4                                                                                                                                                                           |
| Region 23                         | 1                                                                                         | 131142                            | 132683                            | 132683                                                                     | 100,0                                                                               | 1                                                                                        | 794                                                                                           | 794                                                                                                                                                | 100,0                                                                                                                                                                                               | 1                                                                                                                                                                                                        | 22818                                                                                                                                                                             | 23839                                                                                                                                                      | 95,7                                                                                                                                                                                                                                                                                                                           | 0,9                                                                                                                                                                                                                                                                                                                                 | 3,9                                                                                                                                                                           |
| Region 24                         | 0                                                                                         | 5565                              | 4987                              | 0                                                                          | 0,0                                                                                 | 0                                                                                        | 51                                                                                            | 0                                                                                                                                                  | 0,0                                                                                                                                                                                                 | 0                                                                                                                                                                                                        | 1435                                                                                                                                                                              | 1650                                                                                                                                                       | 87,0                                                                                                                                                                                                                                                                                                                           | 0,8                                                                                                                                                                                                                                                                                                                                 | 0,8                                                                                                                                                                           |
| Region 25                         | 0                                                                                         | 30787                             | 30787                             | 0                                                                          | 0,0                                                                                 | 0                                                                                        | 275                                                                                           | 0                                                                                                                                                  | 0,0                                                                                                                                                                                                 | 0                                                                                                                                                                                                        | 7424                                                                                                                                                                              | 7925                                                                                                                                                       | 93,7                                                                                                                                                                                                                                                                                                                           | 0,9                                                                                                                                                                                                                                                                                                                                 | 0,9                                                                                                                                                                           |
| Region 26                         | 0                                                                                         | 287968                            | 273773                            | 0                                                                          | 0,0                                                                                 | 0                                                                                        | 3558                                                                                          | 0                                                                                                                                                  | 0,0                                                                                                                                                                                                 | 0                                                                                                                                                                                                        | 9340                                                                                                                                                                              | 14698                                                                                                                                                      | 63,5                                                                                                                                                                                                                                                                                                                           | 0,6                                                                                                                                                                                                                                                                                                                                 | 0,6                                                                                                                                                                           |
| Region 27                         | 0                                                                                         | 57382                             | 57382                             | 0                                                                          | 0,0                                                                                 | 0                                                                                        | 357                                                                                           | 0                                                                                                                                                  | 0,0                                                                                                                                                                                                 | 0                                                                                                                                                                                                        | 7677                                                                                                                                                                              | 8698                                                                                                                                                       | 88,3                                                                                                                                                                                                                                                                                                                           | 0,8                                                                                                                                                                                                                                                                                                                                 | 0,8                                                                                                                                                                           |
| Region 28                         | 1                                                                                         | 192160                            | 191760                            | 167834                                                                     | 87,5                                                                                | 0,8                                                                                      | 77                                                                                            | 73                                                                                                                                                 | 94,8                                                                                                                                                                                                | 0,9                                                                                                                                                                                                      | 51522                                                                                                                                                                             | 51522                                                                                                                                                      | 100,0                                                                                                                                                                                                                                                                                                                          | 1                                                                                                                                                                                                                                                                                                                                   | 3,7                                                                                                                                                                           |
| Region 29                         | 1                                                                                         | 131663                            | 129141                            | 44080                                                                      | 34,1                                                                                | 0,3                                                                                      | 916                                                                                           | 162                                                                                                                                                | 17,7                                                                                                                                                                                                | 0,1                                                                                                                                                                                                      | 17296                                                                                                                                                                             | 30751                                                                                                                                                      | 56,2                                                                                                                                                                                                                                                                                                                           | 0,5                                                                                                                                                                                                                                                                                                                                 | 1,9                                                                                                                                                                           |
| Region 30                         | 0                                                                                         | 190639                            | 187649                            | 0                                                                          | 0,0                                                                                 | 0                                                                                        | 174                                                                                           | 0                                                                                                                                                  | 0,0                                                                                                                                                                                                 | 0                                                                                                                                                                                                        | 0                                                                                                                                                                                 | 0                                                                                                                                                          |                                                                                                                                                                                                                                                                                                                                |                                                                                                                                                                                                                                                                                                                                     | 0                                                                                                                                                                             |
| Region 31                         | 0                                                                                         | 61574                             | 58235                             | 0                                                                          | 0,0                                                                                 | 0                                                                                        | 58                                                                                            | 0                                                                                                                                                  | 0,0                                                                                                                                                                                                 | 0                                                                                                                                                                                                        | 16472                                                                                                                                                                             | 10083                                                                                                                                                      | 163,4                                                                                                                                                                                                                                                                                                                          | 1                                                                                                                                                                                                                                                                                                                                   | 1                                                                                                                                                                             |
| Region 32                         | 0                                                                                         | 98376                             | 94683                             | 0                                                                          | 0,0                                                                                 | 0                                                                                        | 5                                                                                             | 0                                                                                                                                                  | 0,0                                                                                                                                                                                                 | 0                                                                                                                                                                                                        | 2084                                                                                                                                                                              | 26979                                                                                                                                                      | 7,7                                                                                                                                                                                                                                                                                                                            | 0,1                                                                                                                                                                                                                                                                                                                                 | 0,1                                                                                                                                                                           |
| Region 33                         | 1                                                                                         | 203074                            | 203056                            | 56253                                                                      | 27,7                                                                                | 0,2                                                                                      | 478                                                                                           | 40                                                                                                                                                 | 8,4                                                                                                                                                                                                 | 0,1                                                                                                                                                                                                      | 20927                                                                                                                                                                             | 38909                                                                                                                                                      | 53,8                                                                                                                                                                                                                                                                                                                           | 0,5                                                                                                                                                                                                                                                                                                                                 | 1,8                                                                                                                                                                           |
| Region 34                         | 1                                                                                         | 49269                             | 49269                             | 49269                                                                      | 100,0                                                                               | 1                                                                                        | 192                                                                                           | 118                                                                                                                                                | 61,5                                                                                                                                                                                                | 0,6                                                                                                                                                                                                      | 35556                                                                                                                                                                             | 46428                                                                                                                                                      | 76,6                                                                                                                                                                                                                                                                                                                           | 0,7                                                                                                                                                                                                                                                                                                                                 | 3,3                                                                                                                                                                           |
| Region 35                         | 0                                                                                         | 34145                             | 35096                             | 0                                                                          | 0,0                                                                                 | 0                                                                                        | 6                                                                                             | 0                                                                                                                                                  | 0,0                                                                                                                                                                                                 | 0                                                                                                                                                                                                        | 7432                                                                                                                                                                              | 7432                                                                                                                                                       | 100,0                                                                                                                                                                                                                                                                                                                          | 1                                                                                                                                                                                                                                                                                                                                   | 1                                                                                                                                                                             |
| Region 36                         | 0                                                                                         | 22069                             | 22069                             | 0                                                                          | 0,0                                                                                 | 0                                                                                        | 204                                                                                           | 0                                                                                                                                                  | 0,0                                                                                                                                                                                                 | 0                                                                                                                                                                                                        | 4293                                                                                                                                                                              | 3342                                                                                                                                                       | 128,5                                                                                                                                                                                                                                                                                                                          | 1                                                                                                                                                                                                                                                                                                                                   | 1                                                                                                                                                                             |
| Region 37                         | 0                                                                                         | 80147                             | 78518                             | 0                                                                          | 0,0                                                                                 | 0                                                                                        | 129                                                                                           | 0                                                                                                                                                  | 0,0                                                                                                                                                                                                 | 0                                                                                                                                                                                                        | 56572                                                                                                                                                                             | 78518                                                                                                                                                      | 72,0                                                                                                                                                                                                                                                                                                                           | 0,7                                                                                                                                                                                                                                                                                                                                 | 0,7                                                                                                                                                                           |
| Region 38                         | 0                                                                                         | 22673                             | 22673                             | 0                                                                          | 0,0                                                                                 | 0                                                                                        | 83                                                                                            | 0                                                                                                                                                  | 0,0                                                                                                                                                                                                 | 0                                                                                                                                                                                                        | 4683                                                                                                                                                                              | 12668                                                                                                                                                      | 37,0                                                                                                                                                                                                                                                                                                                           | 0,3                                                                                                                                                                                                                                                                                                                                 | 0,3                                                                                                                                                                           |
| Region 39                         | 0                                                                                         | 63782                             | 63782                             | 0                                                                          | 0,0                                                                                 | 0                                                                                        | 1566                                                                                          | 0                                                                                                                                                  | 0,0                                                                                                                                                                                                 | 0                                                                                                                                                                                                        | 0                                                                                                                                                                                 | 0                                                                                                                                                          |                                                                                                                                                                                                                                                                                                                                |                                                                                                                                                                                                                                                                                                                                     | 0                                                                                                                                                                             |
| Region 40                         | 0                                                                                         | 130631                            | 130631                            | 0                                                                          | 0,0                                                                                 | 0                                                                                        | 53                                                                                            | 0                                                                                                                                                  | 0,0                                                                                                                                                                                                 | 0                                                                                                                                                                                                        | 21716                                                                                                                                                                             | 29340                                                                                                                                                      | 74,0                                                                                                                                                                                                                                                                                                                           | 0,7                                                                                                                                                                                                                                                                                                                                 | 0,7                                                                                                                                                                           |

**Indicators of the regional rehabilitation systems development in Russia (2020)**

| Regions of the Russian Federation | Availability of an interagency information system (presence - 1 point, absence - 0 point) | Total number of PwD in the region | Total number of PwD in the region | Number of PwD, whose data are stored in the interagency information system | The share of of PwD, whose data are stored in the interagency information system, % | The share of PwD, whose data are stored in the interagency information system, points | Number of organizations providing rehabilitation and (or) habilitation measures in the region | Number of organizations providing rehabilitation and (or) habilitation measures in the regions and connected to the interagency information system | The share of organizations providing rehabilitation and (or) habilitation measures in the regions and connected to the interagency information system in the total number of those organizations, % | The share of organizations providing rehabilitation and (or) habilitation measures in the regions and connected to the interagency information system in the total number of those organizations, points | The number of PwD who received measures that were written in the individual rehabilitation/habilitation programs and determined by the regional agencies in the assessment period | The number of PwD who received the individual rehabilitation/habilitation programs in the bureaus of medical and social expertise in the assessment period | The share of PwD who received measures that were written in the individual rehabilitation/habilitation programs and determined by the regional agencies in the total number of PwD who received the individual rehabilitation/habilitation programs in the bureaus of medical and social expertise in the assessment period, % | The share of PwD who received measures that were written in the individual rehabilitation/habilitation programs and determined by the regional agencies in the total number of PwD who received the individual rehabilitation/habilitation programs in the bureaus of medical and social expertise in the assessment period, points | The formation of the information base of the regional system, taking into account the needs of PwD in rehabilitation and (or) habilitation services, points |
|-----------------------------------|-------------------------------------------------------------------------------------------|-----------------------------------|-----------------------------------|----------------------------------------------------------------------------|-------------------------------------------------------------------------------------|---------------------------------------------------------------------------------------|-----------------------------------------------------------------------------------------------|----------------------------------------------------------------------------------------------------------------------------------------------------|-----------------------------------------------------------------------------------------------------------------------------------------------------------------------------------------------------|----------------------------------------------------------------------------------------------------------------------------------------------------------------------------------------------------------|-----------------------------------------------------------------------------------------------------------------------------------------------------------------------------------|------------------------------------------------------------------------------------------------------------------------------------------------------------|--------------------------------------------------------------------------------------------------------------------------------------------------------------------------------------------------------------------------------------------------------------------------------------------------------------------------------|-------------------------------------------------------------------------------------------------------------------------------------------------------------------------------------------------------------------------------------------------------------------------------------------------------------------------------------|-------------------------------------------------------------------------------------------------------------------------------------------------------------|
| Region 41                         | 1                                                                                         | 63185                             | 63867                             | 22340                                                                      | 35,0                                                                                | 0,3                                                                                   | 473                                                                                           | 448                                                                                                                                                | 94,7                                                                                                                                                                                                | 0,9                                                                                                                                                                                                      | 20458                                                                                                                                                                             | 22083                                                                                                                                                      | 92,6                                                                                                                                                                                                                                                                                                                           | 0,9                                                                                                                                                                                                                                                                                                                                 | 3,1                                                                                                                                                         |
| Region 42                         | 1                                                                                         | 68865                             | 67931                             | 67931                                                                      | 100,0                                                                               | 1                                                                                     | 86                                                                                            | 64                                                                                                                                                 | 74,4                                                                                                                                                                                                | 0,7                                                                                                                                                                                                      | 9081                                                                                                                                                                              | 11854                                                                                                                                                      | 76,6                                                                                                                                                                                                                                                                                                                           | 0,7                                                                                                                                                                                                                                                                                                                                 | 3,4                                                                                                                                                         |
| Region 43                         | 0                                                                                         | 58684                             | 56484                             | 0                                                                          | 0,0                                                                                 | 0                                                                                     | 64                                                                                            | 0                                                                                                                                                  | 0,0                                                                                                                                                                                                 | 0                                                                                                                                                                                                        | 6194                                                                                                                                                                              | 11071                                                                                                                                                      | 55,9                                                                                                                                                                                                                                                                                                                           | 0,5                                                                                                                                                                                                                                                                                                                                 | 0,5                                                                                                                                                         |
| Region 44                         | 1                                                                                         | 291847                            | 291847                            | 262663                                                                     | 90,0                                                                                | 0,9                                                                                   | 322                                                                                           | 290                                                                                                                                                | 90,1                                                                                                                                                                                                | 0,9                                                                                                                                                                                                      | 41502                                                                                                                                                                             | 43946                                                                                                                                                      | 94,4                                                                                                                                                                                                                                                                                                                           | 0,9                                                                                                                                                                                                                                                                                                                                 | 3,7                                                                                                                                                         |
| Region 45                         | 0                                                                                         | 359053                            | 359063                            | 0                                                                          | 0,0                                                                                 | 0                                                                                     | 296                                                                                           | 0                                                                                                                                                  | 0,0                                                                                                                                                                                                 | 0                                                                                                                                                                                                        | 30554                                                                                                                                                                             | 66134                                                                                                                                                      | 46,2                                                                                                                                                                                                                                                                                                                           | 0,4                                                                                                                                                                                                                                                                                                                                 | 0,4                                                                                                                                                         |
| Region 46                         | 0                                                                                         | 130252                            | 126097                            | 0                                                                          | 0,0                                                                                 | 0                                                                                     | 25                                                                                            | 0                                                                                                                                                  | 0,0                                                                                                                                                                                                 | 0                                                                                                                                                                                                        | 13994                                                                                                                                                                             | 122125                                                                                                                                                     | 11,5                                                                                                                                                                                                                                                                                                                           | 0,1                                                                                                                                                                                                                                                                                                                                 | 0,1                                                                                                                                                         |
| Region 47                         | 1                                                                                         | 216543                            | 215664                            | 69013                                                                      | 32,0                                                                                | 0,3                                                                                   | 108                                                                                           | 52                                                                                                                                                 | 48,1                                                                                                                                                                                                | 0,4                                                                                                                                                                                                      | 13280                                                                                                                                                                             | 36082                                                                                                                                                      | 36,8                                                                                                                                                                                                                                                                                                                           | 0,3                                                                                                                                                                                                                                                                                                                                 | 2                                                                                                                                                           |
| Region 48                         | 1                                                                                         | 140753                            | 138199                            | 138199                                                                     | 100,0                                                                               | 1                                                                                     | 832                                                                                           | 832                                                                                                                                                | 100,0                                                                                                                                                                                               | 1                                                                                                                                                                                                        | 5654                                                                                                                                                                              | 8486                                                                                                                                                       | 66,6                                                                                                                                                                                                                                                                                                                           | 0,6                                                                                                                                                                                                                                                                                                                                 | 3,6                                                                                                                                                         |
| Region 49                         | 0                                                                                         | 23606                             | 22865                             | 0                                                                          | 0,0                                                                                 | 0                                                                                     | 12                                                                                            | 0                                                                                                                                                  | 0,0                                                                                                                                                                                                 | 0                                                                                                                                                                                                        | 0                                                                                                                                                                                 | 0                                                                                                                                                          |                                                                                                                                                                                                                                                                                                                                |                                                                                                                                                                                                                                                                                                                                     | 0                                                                                                                                                           |
| Region 50                         | 0                                                                                         | 75101                             | 72025                             | 0                                                                          | 0,0                                                                                 | 0                                                                                     | 41                                                                                            | 0                                                                                                                                                  | 0,0                                                                                                                                                                                                 | 0                                                                                                                                                                                                        | 9404                                                                                                                                                                              | 9929                                                                                                                                                       | 94,7                                                                                                                                                                                                                                                                                                                           | 0,9                                                                                                                                                                                                                                                                                                                                 | 0,9                                                                                                                                                         |
| Region 51                         | 1                                                                                         | 220469                            | 220469                            | 119202                                                                     | 54,1                                                                                | 0,5                                                                                   | 1201                                                                                          | 899                                                                                                                                                | 74,9                                                                                                                                                                                                | 0,7                                                                                                                                                                                                      | 29430                                                                                                                                                                             | 42529                                                                                                                                                      | 69,2                                                                                                                                                                                                                                                                                                                           | 0,6                                                                                                                                                                                                                                                                                                                                 | 2,8                                                                                                                                                         |
| Region 52                         | 0                                                                                         | 109339                            | 105068                            | 0                                                                          | 0,0                                                                                 | 0                                                                                     | 72                                                                                            | 0                                                                                                                                                  | 0,0                                                                                                                                                                                                 | 0                                                                                                                                                                                                        | 13636                                                                                                                                                                             | 18835                                                                                                                                                      | 72,4                                                                                                                                                                                                                                                                                                                           | 0,7                                                                                                                                                                                                                                                                                                                                 | 0,7                                                                                                                                                         |
| Region 53                         | 0                                                                                         | 99085                             | 99085                             | 0                                                                          | 0,0                                                                                 | 0                                                                                     | 127                                                                                           | 0                                                                                                                                                  | 0,0                                                                                                                                                                                                 | 0                                                                                                                                                                                                        | 71144                                                                                                                                                                             | 98949                                                                                                                                                      | 71,9                                                                                                                                                                                                                                                                                                                           | 0,7                                                                                                                                                                                                                                                                                                                                 | 0,7                                                                                                                                                         |
| Region 54                         | 0                                                                                         | 69964                             | 63181                             | 0                                                                          | 0,0                                                                                 | 0                                                                                     | 567                                                                                           | 0                                                                                                                                                  | 0,0                                                                                                                                                                                                 | 0                                                                                                                                                                                                        | 6262                                                                                                                                                                              | 11908                                                                                                                                                      | 52,6                                                                                                                                                                                                                                                                                                                           | 0,5                                                                                                                                                                                                                                                                                                                                 | 0,5                                                                                                                                                         |
| Region 55                         | 1                                                                                         | 147570                            | 21993                             | 14478                                                                      | 65,8                                                                                | 0,6                                                                                   | 582                                                                                           | 178                                                                                                                                                | 30,6                                                                                                                                                                                                | 0,3                                                                                                                                                                                                      | 0                                                                                                                                                                                 | 0                                                                                                                                                          |                                                                                                                                                                                                                                                                                                                                |                                                                                                                                                                                                                                                                                                                                     | 1,9                                                                                                                                                         |
| Region 56                         | 1                                                                                         | 98404                             | 98404                             | 98404                                                                      | 100,0                                                                               | 1                                                                                     | 522                                                                                           | 266                                                                                                                                                | 51,0                                                                                                                                                                                                | 0,5                                                                                                                                                                                                      | 71296                                                                                                                                                                             | 71296                                                                                                                                                      | 100,0                                                                                                                                                                                                                                                                                                                          | 1                                                                                                                                                                                                                                                                                                                                   | 3,5                                                                                                                                                         |
| Region 57                         | 1                                                                                         | 107160                            | 109369                            | 107157                                                                     | 98,0                                                                                | 0,9                                                                                   | 148                                                                                           | 148                                                                                                                                                | 100,0                                                                                                                                                                                               | 1                                                                                                                                                                                                        | 39471                                                                                                                                                                             | 107157                                                                                                                                                     | 36,8                                                                                                                                                                                                                                                                                                                           | 0,3                                                                                                                                                                                                                                                                                                                                 | 3,2                                                                                                                                                         |
| Region 58                         | 0                                                                                         | 113509                            | 113509                            | 0                                                                          | 0,0                                                                                 | 0                                                                                     | 64                                                                                            | 0                                                                                                                                                  | 0,0                                                                                                                                                                                                 | 0                                                                                                                                                                                                        | 15168                                                                                                                                                                             | 20600                                                                                                                                                      | 73,6                                                                                                                                                                                                                                                                                                                           | 0,7                                                                                                                                                                                                                                                                                                                                 | 0,7                                                                                                                                                         |
| Region 59                         | 0                                                                                         | 69628                             | 63984                             | 0                                                                          | 0,0                                                                                 | 0                                                                                     | 6                                                                                             | 0                                                                                                                                                  | 0,0                                                                                                                                                                                                 | 0                                                                                                                                                                                                        | 16089                                                                                                                                                                             | 2493                                                                                                                                                       | 645,4                                                                                                                                                                                                                                                                                                                          | 1                                                                                                                                                                                                                                                                                                                                   | 1                                                                                                                                                           |
| Region 60                         | 1                                                                                         | 59434                             | 59434                             | 42432                                                                      | 71,4                                                                                | 0,7                                                                                   | 1507                                                                                          | 135                                                                                                                                                | 9,0                                                                                                                                                                                                 | 0,1                                                                                                                                                                                                      | 53553                                                                                                                                                                             | 59434                                                                                                                                                      | 90,1                                                                                                                                                                                                                                                                                                                           | 0,9                                                                                                                                                                                                                                                                                                                                 | 2,7                                                                                                                                                         |
| Region 61                         | 0                                                                                         | 229976                            | 224932                            | 0                                                                          | 0,0                                                                                 | 0                                                                                     | 1245                                                                                          | 0                                                                                                                                                  | 0,0                                                                                                                                                                                                 | 0                                                                                                                                                                                                        | 49017                                                                                                                                                                             | 52850                                                                                                                                                      | 92,7                                                                                                                                                                                                                                                                                                                           | 0,9                                                                                                                                                                                                                                                                                                                                 | 0,9                                                                                                                                                         |
| Region 62                         | 1                                                                                         | 239368                            | 239368                            | 114010                                                                     | 47,6                                                                                | 0,4                                                                                   | 9                                                                                             | 6                                                                                                                                                  | 66,7                                                                                                                                                                                                | 0,6                                                                                                                                                                                                      | 37422                                                                                                                                                                             | 56059                                                                                                                                                      | 66,8                                                                                                                                                                                                                                                                                                                           | 0,6                                                                                                                                                                                                                                                                                                                                 | 2,6                                                                                                                                                         |
| Region 63                         | 1                                                                                         | 80030                             | 79704                             | 76265                                                                      | 95,7                                                                                | 0,9                                                                                   | 487                                                                                           | 469                                                                                                                                                | 96,3                                                                                                                                                                                                | 0,9                                                                                                                                                                                                      | 20424                                                                                                                                                                             | 14378                                                                                                                                                      | 142,1                                                                                                                                                                                                                                                                                                                          | 1                                                                                                                                                                                                                                                                                                                                   | 3,8                                                                                                                                                         |
| Region 64                         | 0                                                                                         | 16178                             | 13733                             | 0                                                                          | 0,0                                                                                 | 0                                                                                     | 372                                                                                           | 0                                                                                                                                                  | 0,0                                                                                                                                                                                                 | 0                                                                                                                                                                                                        | 7161                                                                                                                                                                              | 4380                                                                                                                                                       | 163,5                                                                                                                                                                                                                                                                                                                          | 1                                                                                                                                                                                                                                                                                                                                   | 1                                                                                                                                                           |
| Region 65                         | 0                                                                                         | 100553                            | 100553                            | 0                                                                          | 0,0                                                                                 | 0                                                                                     | 114                                                                                           | 0                                                                                                                                                  | 0,0                                                                                                                                                                                                 | 0                                                                                                                                                                                                        | 28882                                                                                                                                                                             | 36224                                                                                                                                                      | 79,7                                                                                                                                                                                                                                                                                                                           | 0,7                                                                                                                                                                                                                                                                                                                                 | 0,7                                                                                                                                                         |
| Region 66                         | 1                                                                                         | 286528                            | 286170                            | 161546                                                                     | 56,5                                                                                | 0,5                                                                                   | 509                                                                                           | 358                                                                                                                                                | 70,3                                                                                                                                                                                                | 0,7                                                                                                                                                                                                      | 43256                                                                                                                                                                             | 52207                                                                                                                                                      | 82,9                                                                                                                                                                                                                                                                                                                           | 0,8                                                                                                                                                                                                                                                                                                                                 | 3                                                                                                                                                           |
| Region 67                         | 0                                                                                         | 569956                            | 586235                            | 0                                                                          | 0,0                                                                                 | 0                                                                                     | 1273                                                                                          | 0                                                                                                                                                  | 0,0                                                                                                                                                                                                 | 0                                                                                                                                                                                                        |                                                                                                                                                                                   |                                                                                                                                                            |                                                                                                                                                                                                                                                                                                                                |                                                                                                                                                                                                                                                                                                                                     | 0                                                                                                                                                           |
| Region 68                         | 0                                                                                         | 123311                            | 122674                            | 0                                                                          | 0,0                                                                                 | 0                                                                                     | 671                                                                                           | 0                                                                                                                                                  | 0,0                                                                                                                                                                                                 | 0                                                                                                                                                                                                        | 43066                                                                                                                                                                             | 27938                                                                                                                                                      | 154,1                                                                                                                                                                                                                                                                                                                          | 1                                                                                                                                                                                                                                                                                                                                   | 1                                                                                                                                                           |
| Region 69                         | 0                                                                                         | 61504                             | 61504                             | 0                                                                          | 0,0                                                                                 | 0                                                                                     | 28                                                                                            | 0                                                                                                                                                  | 0,0                                                                                                                                                                                                 | 0                                                                                                                                                                                                        | 4539                                                                                                                                                                              | 823                                                                                                                                                        | 551,5                                                                                                                                                                                                                                                                                                                          | 1                                                                                                                                                                                                                                                                                                                                   | 1                                                                                                                                                           |
| Region 70                         | 0                                                                                         | 112444                            | 112294                            | 0                                                                          | 0,0                                                                                 | 0                                                                                     | 94                                                                                            | 0                                                                                                                                                  | 0,0                                                                                                                                                                                                 | 0                                                                                                                                                                                                        | 6838                                                                                                                                                                              | 0                                                                                                                                                          |                                                                                                                                                                                                                                                                                                                                |                                                                                                                                                                                                                                                                                                                                     | 0                                                                                                                                                           |
| Region 71                         | 0                                                                                         | 23357                             | 22721                             | 0                                                                          | 0,0                                                                                 | 0                                                                                     | 55                                                                                            | 0                                                                                                                                                  | 0,0                                                                                                                                                                                                 | 0                                                                                                                                                                                                        | 0                                                                                                                                                                                 | 3889                                                                                                                                                       | 0,0                                                                                                                                                                                                                                                                                                                            | 0                                                                                                                                                                                                                                                                                                                                   | 0                                                                                                                                                           |
| Region 72                         | 1                                                                                         | 55445                             | 52886                             | 27616                                                                      | 52,2                                                                                | 0,5                                                                                   | 180                                                                                           | 64                                                                                                                                                 | 35,6                                                                                                                                                                                                | 0,3                                                                                                                                                                                                      | 2040                                                                                                                                                                              | 8818                                                                                                                                                       | 23,1                                                                                                                                                                                                                                                                                                                           | 0,2                                                                                                                                                                                                                                                                                                                                 | 2                                                                                                                                                           |
| Region 73                         | 0                                                                                         | 29210                             | 28745                             | 0                                                                          | 0,0                                                                                 | 0                                                                                     | 32                                                                                            | 0                                                                                                                                                  | 0,0                                                                                                                                                                                                 | 0                                                                                                                                                                                                        | 2466                                                                                                                                                                              | 1919                                                                                                                                                       | 128,5                                                                                                                                                                                                                                                                                                                          | 1                                                                                                                                                                                                                                                                                                                                   | 1                                                                                                                                                           |
| Region 74                         | 1                                                                                         | 350587                            | 335414                            | 19540                                                                      | 5,8                                                                                 | 0,1                                                                                   | 187                                                                                           | 70                                                                                                                                                 | 37,4                                                                                                                                                                                                | 0,3                                                                                                                                                                                                      | 172922                                                                                                                                                                            | 335578                                                                                                                                                     | 51,5                                                                                                                                                                                                                                                                                                                           | 0,5                                                                                                                                                                                                                                                                                                                                 | 1,9                                                                                                                                                         |
| Region 75                         | 1                                                                                         | 220433                            | 66864                             | 40636                                                                      | 60,8                                                                                | 0,6                                                                                   | 158                                                                                           | 22                                                                                                                                                 | 13,9                                                                                                                                                                                                | 0,1                                                                                                                                                                                                      | 29185                                                                                                                                                                             | 40397                                                                                                                                                      | 72,2                                                                                                                                                                                                                                                                                                                           | 0,7                                                                                                                                                                                                                                                                                                                                 | 2,4                                                                                                                                                         |
| Region 76                         | 1                                                                                         | 453247                            | 454067                            | 37187                                                                      | 8,2                                                                                 | 0,1                                                                                   | 195                                                                                           | 125                                                                                                                                                | 64,1                                                                                                                                                                                                | 0,6                                                                                                                                                                                                      | 55173                                                                                                                                                                             | 108183                                                                                                                                                     | 51,0                                                                                                                                                                                                                                                                                                                           | 0,5                                                                                                                                                                                                                                                                                                                                 | 2,2                                                                                                                                                         |
| Region 77                         | 0                                                                                         | 74309                             | 59141                             | 0                                                                          | 0,0                                                                                 | 0                                                                                     | 7                                                                                             | 0                                                                                                                                                  | 0,0                                                                                                                                                                                                 | 0                                                                                                                                                                                                        | 0                                                                                                                                                                                 | 0                                                                                                                                                          |                                                                                                                                                                                                                                                                                                                                |                                                                                                                                                                                                                                                                                                                                     | 0                                                                                                                                                           |
| Region 78                         | 1                                                                                         | 59196                             | 59196                             | 15442                                                                      | 26,1                                                                                | 0,2                                                                                   | 129                                                                                           | 73                                                                                                                                                 | 56,6                                                                                                                                                                                                | 0,5                                                                                                                                                                                                      | 11285                                                                                                                                                                             | 13613                                                                                                                                                      | 82,9                                                                                                                                                                                                                                                                                                                           | 0,8                                                                                                                                                                                                                                                                                                                                 | 2,5                                                                                                                                                         |
| Region 79                         | 0                                                                                         | 259317                            | 259315                            | 0                                                                          | 0,0                                                                                 | 0                                                                                     | 83                                                                                            | 0                                                                                                                                                  | 0,0                                                                                                                                                                                                 | 0                                                                                                                                                                                                        | 44688                                                                                                                                                                             | 77963                                                                                                                                                      | 57,3                                                                                                                                                                                                                                                                                                                           | 0,5                                                                                                                                                                                                                                                                                                                                 | 0,5                                                                                                                                                         |
| Region 80                         | 1                                                                                         |                                   | 116115                            | 22815                                                                      | 19,6                                                                                | 0,1                                                                                   | 81                                                                                            | 43                                                                                                                                                 | 53,1                                                                                                                                                                                                | 0,5                                                                                                                                                                                                      | 18668                                                                                                                                                                             | 18742                                                                                                                                                      | 99,6                                                                                                                                                                                                                                                                                                                           | 0,9                                                                                                                                                                                                                                                                                                                                 | 2,5                                                                                                                                                         |

**Indicators of the regional rehabilitation systems development in Russia (2020)**

| Regions of the Russian Federation | Availability of an interagency information system (presence - 1 point, absence - 0 point) | Total number of PwD in the region | Total number of PwD in the region | Number of PwD, whose data are stored in the interagency information system | The share of of PwD, whose data are stored in the interagency information system, % | The share of PwD, whose data are stored in the interagency information system, points | Number of organizations providing rehabilitation and (or) habilitation measures in the region | Number of organizations providing rehabilitation and (or) habilitation measures in the regions and connected to the interagency information system | The share of organizations providing rehabilitation and (or) habilitation measures in the regions and connected to the interagency information system in the total number of those organizations, % | The share of organizations providing rehabilitation and (or) habilitation measures in the regions and connected to the interagency information system in the total number of those organizations, points | The number of PwD who received measures that were written in the individual rehabilitation/habilitation programs and determined by the regional agencies in the assessment period | The number of PwD who received the individual rehabilitation/habilitation programs in the bureaus of medical and social expertise in the assessment period | The share of PwD who received measures that were written in the individual rehabilitation/habilitation programs and determined by the regional agencies in the total number of PWD who received the individual rehabilitation/habilitation programs in the bureaus of medical and social expertise in the assessment period, % | The share of PwD who received measures that were written in the individual rehabilitation/habilitation programs and determined by the regional agencies in the total number of PWD who received the individual rehabilitation/habilitation programs in the bureaus of medical and social expertise in the assessment period, points | The formation of the information base of the regional system, taking into account the needs of PwD in rehabilitation and (or) habilitation services, points |
|-----------------------------------|-------------------------------------------------------------------------------------------|-----------------------------------|-----------------------------------|----------------------------------------------------------------------------|-------------------------------------------------------------------------------------|---------------------------------------------------------------------------------------|-----------------------------------------------------------------------------------------------|----------------------------------------------------------------------------------------------------------------------------------------------------|-----------------------------------------------------------------------------------------------------------------------------------------------------------------------------------------------------|----------------------------------------------------------------------------------------------------------------------------------------------------------------------------------------------------------|-----------------------------------------------------------------------------------------------------------------------------------------------------------------------------------|------------------------------------------------------------------------------------------------------------------------------------------------------------|--------------------------------------------------------------------------------------------------------------------------------------------------------------------------------------------------------------------------------------------------------------------------------------------------------------------------------|-------------------------------------------------------------------------------------------------------------------------------------------------------------------------------------------------------------------------------------------------------------------------------------------------------------------------------------|-------------------------------------------------------------------------------------------------------------------------------------------------------------|
| Region 81                         | 1                                                                                         |                                   | 432772                            | 432772                                                                     | 100,0                                                                               | 1                                                                                     | 1114                                                                                          | 891                                                                                                                                                | 80,0                                                                                                                                                                                                | 0,7                                                                                                                                                                                                      | 20955                                                                                                                                                                             | 101830                                                                                                                                                     | 20,6                                                                                                                                                                                                                                                                                                                           | 0,2                                                                                                                                                                                                                                                                                                                                 | 2,9                                                                                                                                                         |
| Region 82                         | 1                                                                                         |                                   | 1895                              | 1262                                                                       | 66,6                                                                                | 0,6                                                                                   | 4                                                                                             | 3                                                                                                                                                  | 75,0                                                                                                                                                                                                | 0,7                                                                                                                                                                                                      | 561                                                                                                                                                                               | 561                                                                                                                                                        | 100,0                                                                                                                                                                                                                                                                                                                          | 1                                                                                                                                                                                                                                                                                                                                   | 3,3                                                                                                                                                         |
| Region 83                         | 0                                                                                         | 2 869                             | 2869                              | 0                                                                          | 0,0                                                                                 | 0                                                                                     | 0                                                                                             | 0                                                                                                                                                  | 0,0                                                                                                                                                                                                 | 0                                                                                                                                                                                                        | 0                                                                                                                                                                                 | 0                                                                                                                                                          |                                                                                                                                                                                                                                                                                                                                |                                                                                                                                                                                                                                                                                                                                     | 0                                                                                                                                                           |

### Indicators of the regional rehabilitation systems development in Russia (2020)

| Regions of the Russian Federation | The formation of an integrated approach to the organization of the regional system in the region, points | The satisfaction of PwD (their legal representatives) with rehabilitation or habilitation measures (services), points | The staffing of organizations providing rehabilitation and (or) habilitation services with specialists of the appropriate profile based on the needs of PwD in rehabilitation and (or) habilitation services | The formation of the information base of the regional system, taking into account information about the needs of PwD in rehabilitation and (or) habilitation services, points | The final point score of the regional rehabilitation system, points |
|-----------------------------------|----------------------------------------------------------------------------------------------------------|-----------------------------------------------------------------------------------------------------------------------|--------------------------------------------------------------------------------------------------------------------------------------------------------------------------------------------------------------|-------------------------------------------------------------------------------------------------------------------------------------------------------------------------------|---------------------------------------------------------------------|
| Region 1                          | 3,4                                                                                                      | 1,6                                                                                                                   | 1,2                                                                                                                                                                                                          | 1,1                                                                                                                                                                           | 7,3                                                                 |
| Region 2                          | 2,1                                                                                                      | 1,2                                                                                                                   | 1,2                                                                                                                                                                                                          | 0,6                                                                                                                                                                           | 5,1                                                                 |
| Region 3                          | 4,7                                                                                                      | 1                                                                                                                     | 0,1                                                                                                                                                                                                          | 3,1                                                                                                                                                                           | 8,9                                                                 |
| Region 4                          | 2,8                                                                                                      | 1,7                                                                                                                   | 1,5                                                                                                                                                                                                          | 0,8                                                                                                                                                                           | 6,8                                                                 |
| Region 5                          | 2,5                                                                                                      | 1,8                                                                                                                   | 0,5                                                                                                                                                                                                          | 2,8                                                                                                                                                                           | 7,6                                                                 |
| Region 6                          | 3,9                                                                                                      | 1,3                                                                                                                   | 1,5                                                                                                                                                                                                          | 2,3                                                                                                                                                                           | 9                                                                   |
| Region 7                          | 4,6                                                                                                      | 1,6                                                                                                                   | 1,2                                                                                                                                                                                                          | 3,1                                                                                                                                                                           | 10,5                                                                |
| Region 8                          | 3,5                                                                                                      | 1,4                                                                                                                   | 1,5                                                                                                                                                                                                          | 2,8                                                                                                                                                                           | 9,2                                                                 |
| Region 9                          | 3,5                                                                                                      | 1,7                                                                                                                   | 1,1                                                                                                                                                                                                          | 3                                                                                                                                                                             | 9,3                                                                 |
| Region 10                         | 3                                                                                                        | 1,7                                                                                                                   | 1,2                                                                                                                                                                                                          | 2,8                                                                                                                                                                           | 8,7                                                                 |
| Region 11                         | 1,6                                                                                                      | 0,9                                                                                                                   | 1,1                                                                                                                                                                                                          | 3,4                                                                                                                                                                           | 7                                                                   |
| Region 12                         | 3,7                                                                                                      | 1,8                                                                                                                   | 1,2                                                                                                                                                                                                          | 2                                                                                                                                                                             | 8,7                                                                 |
| Region 13                         | 4,5                                                                                                      | 1,8                                                                                                                   | 1,8                                                                                                                                                                                                          | 0,7                                                                                                                                                                           | 8,8                                                                 |
| Region 14                         | 3,1                                                                                                      | 0,7                                                                                                                   | 0,1                                                                                                                                                                                                          | 0,9                                                                                                                                                                           | 4,8                                                                 |
| Region 15                         | 3,1                                                                                                      | 1,7                                                                                                                   | 1,3                                                                                                                                                                                                          | 2,7                                                                                                                                                                           | 8,8                                                                 |
| Region 16                         | 4,6                                                                                                      | 1,2                                                                                                                   | 1,3                                                                                                                                                                                                          | 2,8                                                                                                                                                                           | 9,9                                                                 |

### Indicators of the regional rehabilitation systems development in Russia (2020)

| Regions of the Russian Federation | The formation of an integrated approach to the organization of the regional system in the region, points | The satisfaction of PwD (their legal representatives) with rehabilitation or habilitation measures (services), points | The staffing of organizations providing rehabilitation and (or) habilitation services with specialists of the appropriate profile based on the needs of PwD in rehabilitation and (or) habilitation services | The formation of the information base of the regional system, taking into account information about the needs of PwD in rehabilitation and (or) habilitation services, points | The final point score of the regional rehabilitation system, points |
|-----------------------------------|----------------------------------------------------------------------------------------------------------|-----------------------------------------------------------------------------------------------------------------------|--------------------------------------------------------------------------------------------------------------------------------------------------------------------------------------------------------------|-------------------------------------------------------------------------------------------------------------------------------------------------------------------------------|---------------------------------------------------------------------|
| Region 17                         | 4                                                                                                        | 1,3                                                                                                                   | 0,5                                                                                                                                                                                                          | 2,2                                                                                                                                                                           | 8                                                                   |
| Region 18                         | 2,4                                                                                                      | 1,8                                                                                                                   | 1,3                                                                                                                                                                                                          | 1                                                                                                                                                                             | 6,5                                                                 |
| Region 19                         | 4,1                                                                                                      | 1,8                                                                                                                   | 1                                                                                                                                                                                                            | 2,9                                                                                                                                                                           | 9,8                                                                 |
| Region 20                         | 3,5                                                                                                      | 1,4                                                                                                                   | 0,7                                                                                                                                                                                                          | 0,7                                                                                                                                                                           | 6,3                                                                 |
| Region 21                         | 5                                                                                                        | 1,8                                                                                                                   | 1,1                                                                                                                                                                                                          | 0,7                                                                                                                                                                           | 8,6                                                                 |
| Region 22                         | 3                                                                                                        | 1,8                                                                                                                   | 1,5                                                                                                                                                                                                          | 2,4                                                                                                                                                                           | 8,7                                                                 |
| Region 23                         | 5                                                                                                        | 1,8                                                                                                                   | 1,3                                                                                                                                                                                                          | 3,9                                                                                                                                                                           | 12                                                                  |
| Region 24                         | 4,9                                                                                                      | 1,4                                                                                                                   | 0,5                                                                                                                                                                                                          | 0,8                                                                                                                                                                           | 7,6                                                                 |
| Region 25                         | 3,7                                                                                                      | 1,5                                                                                                                   | 1,3                                                                                                                                                                                                          | 0,9                                                                                                                                                                           | 7,4                                                                 |
| Region 26                         | 3,6                                                                                                      | 1,6                                                                                                                   | 0,8                                                                                                                                                                                                          | 0,6                                                                                                                                                                           | 6,6                                                                 |
| Region 27                         | 4,9                                                                                                      | 1,8                                                                                                                   | 1,5                                                                                                                                                                                                          | 0,8                                                                                                                                                                           | 9                                                                   |
| Region 28                         | 3                                                                                                        | 1,8                                                                                                                   | 1                                                                                                                                                                                                            | 3,7                                                                                                                                                                           | 9,5                                                                 |
| Region 29                         | 3,5                                                                                                      | 1,6                                                                                                                   | 1,3                                                                                                                                                                                                          | 1,9                                                                                                                                                                           | 8,3                                                                 |
| Region 30                         | 4                                                                                                        | 1,8                                                                                                                   | 0,8                                                                                                                                                                                                          | 0                                                                                                                                                                             | 6,6                                                                 |
| Region 31                         | 3,4                                                                                                      | 1,8                                                                                                                   | 1,3                                                                                                                                                                                                          | 1                                                                                                                                                                             | 7,5                                                                 |
| Region 32                         | 2                                                                                                        | 1,9                                                                                                                   | 1,2                                                                                                                                                                                                          | 0,1                                                                                                                                                                           | 5,2                                                                 |

### Indicators of the regional rehabilitation systems development in Russia (2020)

| Regions of the Russian Federation | The formation of an integrated approach to the organization of the regional system in the region, points | The satisfaction of PwD (their legal representatives) with rehabilitation or habilitation measures (services), points | The staffing of organizations providing rehabilitation and (or) habilitation services with specialists of the appropriate profile based on the needs of PwD in rehabilitation and (or) habilitation services | The formation of the information base of the regional system, taking into account information about the needs of PwD in rehabilitation and (or) habilitation services, points | The final point score of the regional rehabilitation system, points |
|-----------------------------------|----------------------------------------------------------------------------------------------------------|-----------------------------------------------------------------------------------------------------------------------|--------------------------------------------------------------------------------------------------------------------------------------------------------------------------------------------------------------|-------------------------------------------------------------------------------------------------------------------------------------------------------------------------------|---------------------------------------------------------------------|
| Region 33                         | 3,2                                                                                                      | 1,8                                                                                                                   | 1,3                                                                                                                                                                                                          | 1,8                                                                                                                                                                           | 8,1                                                                 |
| Region 34                         | 4,5                                                                                                      | 1,7                                                                                                                   | 1,8                                                                                                                                                                                                          | 3,3                                                                                                                                                                           | 11,3                                                                |
| Region 35                         | 3                                                                                                        | 1,3                                                                                                                   | 0,3                                                                                                                                                                                                          | 1                                                                                                                                                                             | 5,6                                                                 |
| Region 36                         | 2,7                                                                                                      | 1,4                                                                                                                   | 1,8                                                                                                                                                                                                          | 1                                                                                                                                                                             | 6,9                                                                 |
| Region 37                         | 4,5                                                                                                      | 1,6                                                                                                                   | 1,8                                                                                                                                                                                                          | 0,7                                                                                                                                                                           | 8,6                                                                 |
| Region 38                         | 3,9                                                                                                      | 1,9                                                                                                                   | 0,8                                                                                                                                                                                                          | 0,3                                                                                                                                                                           | 6,9                                                                 |
| Region 39                         | 2,4                                                                                                      | 1,6                                                                                                                   | 0,8                                                                                                                                                                                                          | 0                                                                                                                                                                             | 4,8                                                                 |
| Region 40                         | 3,6                                                                                                      | 1,8                                                                                                                   | 1,5                                                                                                                                                                                                          | 0,7                                                                                                                                                                           | 7,6                                                                 |
| Region 41                         | 3,7                                                                                                      | 1,8                                                                                                                   | 1                                                                                                                                                                                                            | 3,1                                                                                                                                                                           | 9,6                                                                 |
| Region 42                         | 2,3                                                                                                      | 2                                                                                                                     | 0,5                                                                                                                                                                                                          | 3,4                                                                                                                                                                           | 8,2                                                                 |
| Region 43                         | 4,6                                                                                                      | 1,8                                                                                                                   | 0,8                                                                                                                                                                                                          | 0,5                                                                                                                                                                           | 7,7                                                                 |
| Region 44                         | 3,5                                                                                                      | 1,8                                                                                                                   | 1,5                                                                                                                                                                                                          | 3,7                                                                                                                                                                           | 10,5                                                                |
| Region 45                         | 3,4                                                                                                      | 1,8                                                                                                                   | 1,5                                                                                                                                                                                                          | 0,4                                                                                                                                                                           | 7,1                                                                 |
| Region 46                         | 1,7                                                                                                      | 1,8                                                                                                                   | 0                                                                                                                                                                                                            | 0,1                                                                                                                                                                           | 3,6                                                                 |
| Region 47                         | 2,5                                                                                                      | 1,8                                                                                                                   | 1,3                                                                                                                                                                                                          | 2                                                                                                                                                                             | 7,6                                                                 |
| Region 48                         | 3,2                                                                                                      | 1,6                                                                                                                   | 1                                                                                                                                                                                                            | 3,6                                                                                                                                                                           | 9,4                                                                 |

### Indicators of the regional rehabilitation systems development in Russia (2020)

| Regions of the Russian Federation | The formation of an integrated approach to the organization of the regional system in the region, points | The satisfaction of PwD (their legal representatives) with rehabilitation or habilitation measures (services), points | The staffing of organizations providing rehabilitation and (or) habilitation services with specialists of the appropriate profile based on the needs of PwD in rehabilitation and (or) habilitation services | The formation of the information base of the regional system, taking into account information about the needs of PwD in rehabilitation and (or) habilitation services, points | The final point score of the regional rehabilitation system, points |
|-----------------------------------|----------------------------------------------------------------------------------------------------------|-----------------------------------------------------------------------------------------------------------------------|--------------------------------------------------------------------------------------------------------------------------------------------------------------------------------------------------------------|-------------------------------------------------------------------------------------------------------------------------------------------------------------------------------|---------------------------------------------------------------------|
| Region 49                         | 3,9                                                                                                      | 1,8                                                                                                                   | 1                                                                                                                                                                                                            | 0                                                                                                                                                                             | 6,7                                                                 |
| Region 50                         | 3,4                                                                                                      | 2                                                                                                                     | 0,8                                                                                                                                                                                                          | 0,9                                                                                                                                                                           | 7,1                                                                 |
| Region 51                         | 4                                                                                                        | 1,8                                                                                                                   | 1,1                                                                                                                                                                                                          | 2,8                                                                                                                                                                           | 9,7                                                                 |
| Region 52                         | 3,8                                                                                                      | 1,7                                                                                                                   | 0,8                                                                                                                                                                                                          | 0,7                                                                                                                                                                           | 7                                                                   |
| Region 53                         | 4,6                                                                                                      | 1,8                                                                                                                   | 1,2                                                                                                                                                                                                          | 0,7                                                                                                                                                                           | 8,3                                                                 |
| Region 54                         | 4                                                                                                        | 1,8                                                                                                                   | 1,3                                                                                                                                                                                                          | 0,5                                                                                                                                                                           | 7,6                                                                 |
| Region 55                         | 1                                                                                                        | 1,8                                                                                                                   | 1,5                                                                                                                                                                                                          | 1,9                                                                                                                                                                           | 6,2                                                                 |
| Region 56                         | 4,7                                                                                                      | 1,8                                                                                                                   | 1,8                                                                                                                                                                                                          | 3,5                                                                                                                                                                           | 11,8                                                                |
| Region 57                         | 5                                                                                                        | 1,8                                                                                                                   | 0,2                                                                                                                                                                                                          | 3,2                                                                                                                                                                           | 10,2                                                                |
| Region 58                         | 4,6                                                                                                      | 1,6                                                                                                                   | 2                                                                                                                                                                                                            | 0,7                                                                                                                                                                           | 8,9                                                                 |
| Region 59                         | 4,9                                                                                                      | 1,8                                                                                                                   | 1,7                                                                                                                                                                                                          | 1                                                                                                                                                                             | 9,4                                                                 |
| Region 60                         | 2                                                                                                        | 1,7                                                                                                                   | 1,5                                                                                                                                                                                                          | 2,7                                                                                                                                                                           | 7,9                                                                 |
| Region 61                         | 3                                                                                                        | 1,8                                                                                                                   | 0,8                                                                                                                                                                                                          | 0,9                                                                                                                                                                           | 6,5                                                                 |
| Region 62                         | 5                                                                                                        | 1,8                                                                                                                   | 1,5                                                                                                                                                                                                          | 2,6                                                                                                                                                                           | 10,9                                                                |
| Region 63                         | 4,5                                                                                                      | 1,8                                                                                                                   | 1,6                                                                                                                                                                                                          | 3,8                                                                                                                                                                           | 11,7                                                                |
| Region 64                         | 4                                                                                                        | 1,2                                                                                                                   | 1                                                                                                                                                                                                            | 1                                                                                                                                                                             | 7,2                                                                 |

### Indicators of the regional rehabilitation systems development in Russia (2020)

| Regions of the Russian Federation | The formation of an integrated approach to the organization of the regional system in the region, points | The satisfaction of PwD (their legal representatives) with rehabilitation or habilitation measures (services), points | The staffing of organizations providing rehabilitation and (or) habilitation services with specialists of the appropriate profile based on the needs of PwD in rehabilitation and (or) habilitation services | The formation of the information base of the regional system, taking into account information about the needs of PwD in rehabilitation and (or) habilitation services, points | The final point score of the regional rehabilitation system, points |
|-----------------------------------|----------------------------------------------------------------------------------------------------------|-----------------------------------------------------------------------------------------------------------------------|--------------------------------------------------------------------------------------------------------------------------------------------------------------------------------------------------------------|-------------------------------------------------------------------------------------------------------------------------------------------------------------------------------|---------------------------------------------------------------------|
| Region 65                         | 4,5                                                                                                      | 1,9                                                                                                                   | 1,8                                                                                                                                                                                                          | 0,7                                                                                                                                                                           | 8,9                                                                 |
| Region 66                         | 1,6                                                                                                      | 1,4                                                                                                                   | 1,3                                                                                                                                                                                                          | 3                                                                                                                                                                             | 7,3                                                                 |
| Region 67                         | 3                                                                                                        | 1,4                                                                                                                   | 0,5                                                                                                                                                                                                          | 0                                                                                                                                                                             | 4,9                                                                 |
| Region 68                         | 3,1                                                                                                      | 1,8                                                                                                                   | 1,1                                                                                                                                                                                                          | 1                                                                                                                                                                             | 7                                                                   |
| Region 69                         | 2,8                                                                                                      | 1,8                                                                                                                   | 0,5                                                                                                                                                                                                          | 1                                                                                                                                                                             | 6,1                                                                 |
| Region 70                         | 3,3                                                                                                      | 1,8                                                                                                                   | 2                                                                                                                                                                                                            | 0                                                                                                                                                                             | 7,1                                                                 |
| Region 71                         | 0,9                                                                                                      | 1,7                                                                                                                   | 2                                                                                                                                                                                                            | 0                                                                                                                                                                             | 4,6                                                                 |
| Region 72                         | 5                                                                                                        | 0,9                                                                                                                   | 1                                                                                                                                                                                                            | 2                                                                                                                                                                             | 8,9                                                                 |
| Region 73                         | 3                                                                                                        | 1,8                                                                                                                   | 1,1                                                                                                                                                                                                          | 1                                                                                                                                                                             | 6,9                                                                 |
| Region 74                         | 4                                                                                                        | 1,6                                                                                                                   | 1,1                                                                                                                                                                                                          | 1,9                                                                                                                                                                           | 8,6                                                                 |
| Region 75                         | 4,5                                                                                                      | 1,4                                                                                                                   | 0,7                                                                                                                                                                                                          | 2,4                                                                                                                                                                           | 9                                                                   |
| Region 76                         | 4,2                                                                                                      | 1,9                                                                                                                   | 1,3                                                                                                                                                                                                          | 2,2                                                                                                                                                                           | 9,6                                                                 |
| Region 77                         | 2                                                                                                        | 0                                                                                                                     | 1,5                                                                                                                                                                                                          | 0                                                                                                                                                                             | 3,5                                                                 |
| Region 78                         | 4,5                                                                                                      | 0,9                                                                                                                   | 1,3                                                                                                                                                                                                          | 2,5                                                                                                                                                                           | 9,2                                                                 |
| Region 79                         | 4,1                                                                                                      | 1,8                                                                                                                   | 1                                                                                                                                                                                                            | 0,5                                                                                                                                                                           | 7,4                                                                 |
| Region 80                         | 3,7                                                                                                      | 1,5                                                                                                                   | 0,3                                                                                                                                                                                                          | 2,5                                                                                                                                                                           | 8                                                                   |

### Indicators of the regional rehabilitation systems development in Russia (2020)

| Regions of the Russian Federation | The formation of an integrated approach to the organization of the regional system in the region, points | The satisfaction of PwD (their legal representatives) with rehabilitation or habilitation measures (services), points | The staffing of organizations providing rehabilitation and (or) habilitation services with specialists of the appropriate profile based on the needs of PwD in rehabilitation and (or) habilitation services | The formation of the information base of the regional system, taking into account information about the needs of PwD in rehabilitation and (or) habilitation services, points | The final point score of the regional rehabilitation system, points |
|-----------------------------------|----------------------------------------------------------------------------------------------------------|-----------------------------------------------------------------------------------------------------------------------|--------------------------------------------------------------------------------------------------------------------------------------------------------------------------------------------------------------|-------------------------------------------------------------------------------------------------------------------------------------------------------------------------------|---------------------------------------------------------------------|
| Region 81                         | 4,8                                                                                                      | 1,8                                                                                                                   | 1,8                                                                                                                                                                                                          | 2,9                                                                                                                                                                           | 11,3                                                                |
| Region 82                         | 3                                                                                                        | 0                                                                                                                     | 0                                                                                                                                                                                                            | 3,3                                                                                                                                                                           | 6,3                                                                 |
| Region 83                         | 0,4                                                                                                      | 0                                                                                                                     | 0                                                                                                                                                                                                            | 0                                                                                                                                                                             | 0,4                                                                 |
